# Supplementary material for: Mouse Gnal transcripts and transcriptomics in isolated dystonia
Source: Research Square preprint supplement (doi:10.21203/rs.3.rs-7222154/v1), 2025-08-29
Supplement: Supplementary file 1 [file de6c3f7e9d480a24018805a7.xlsx]

## Sheet: Striatum
Gene	log2FoldChange	pvalue	padj	1SW	2SW	3SW	4SW	5SW	6SW	7SW	8SW
Mmp12	-2.08367	0.0182553	0.999875	7.49927	26.6581	5.14521	2.71074	2.02747	0	4.07586	3.8152
Rtn4rl2	-2.03836	0.000565771	0.410673	29.9971	8.04773	22.9196	26.4298	5.06868	0	4.07586	8.58419
Gucy2g	-1.84572	0.000347721	0.364404	42.853	19.6163	15.4356	18.9752	5.57554	2.83281	12.2276	7.6304
Igf2bp2	-1.84097	0.00577445	0.893581	9.64192	10.5626	11.6937	10.1653	3.04121	2.83281	0	3.8152
Cd74	-1.76384	0.0327015	0.999875	29.9971	88.0221	11.2259	12.1983	16.2198	5.66562	8.15172	9.53799
Cybb	-1.61477	0.0230218	0.999875	4.2853	34.2029	26.6615	5.42149	9.12362	2.83281	4.07586	4.769
Lipg	-1.61169	0.0199664	0.999875	4.2853	14.0835	13.0969	12.1983	5.57554	2.83281	0	2.8614
Dkkl1	-1.58858	0.011346	0.984178	22.4978	6.0358	12.6292	23.0413	7.60302	0	8.15172	3.8152
Iigp1	-1.58411	0.0086196	0.938155	21.4265	32.1909	8.88718	9.48761	5.57554	8.49842	0	7.6304
Smoc2	-1.56699	0.0177184	0.999875	8.57059	9.55668	11.6937	25.7521	3.04121	0	4.07586	9.53799
Gm35501	-1.53116	0.00761327	0.931647	10.7132	13.5805	14.0324	12.1983	4.56181	8.49842	0	3.8152
Dtl	-1.47696	0.00374841	0.777381	33.211	14.0835	21.0486	30.4959	12.1648	2.83281	20.3793	2.8614
Scube1	-1.45187	4.25728e-05	0.145374	117.846	54.8252	60.807	54.2149	34.9739	11.3312	16.3034	29.5678
Lilrb4a	-1.42674	0.0172943	0.999875	25.7118	37.7237	21.9841	4.7438	11.658	8.49842	0	8.58419
Nr4a2	-1.37727	0.0178028	0.999875	101.776	34.7058	127.695	203.306	56.7692	28.3281	28.531	61.0432
Nov	-1.36017	7.44763e-06	0.0594656	89.9912	51.3043	116.937	127.405	38.5219	45.3249	44.8345	27.6602
Serpina3n	-1.30273	0.0450298	0.999875	365.321	985.847	311.519	99.6199	243.803	161.47	154.883	152.608
Slfn2	-1.28833	0.00588688	0.893581	24.6405	22.6342	20.5808	12.1983	7.60302	8.49842	16.3034	5.7228
Parp14	-1.28467	0.000953078	0.491239	70.7074	54.3222	32.7422	23.0413	18.7541	22.6625	12.2276	18.1222
Tnfsfm13	-1.27205	0.02832	0.999875	16.0699	12.5746	13.5646	10.1653	7.60302	2.83281	0	5.7228
Cst7	-1.26952	0.0887131	0.999875	10.7132	25.1492	8.88718	2.03306	4.56181	0	8.15172	6.6766
Cd48	-1.26098	0.00851968	0.938155	18.2125	20.1193	21.0486	11.5207	6.08241	11.3312	4.07586	8.58419
Oasl2	-1.24777	0.00745405	0.931647	98.5618	48.2864	27.1293	16.2645	20.7816	16.9968	20.3793	20.0298
Slc30a3	-1.20844	4.55175e-05	0.145374	100.704	66.8968	76.2427	70.4794	41.0563	8.49842	28.531	42.921
Lyz2	-1.20433	0.0228052	0.999875	232.477	454.697	199.26	78.6116	143.95	90.6498	85.593	95.3799
Ushbp1	-1.20019	0.0077541	0.931647	23.5691	13.0776	23.8551	23.0413	9.63049	2.83281	16.3034	8.58419
Hgf	-1.18172	0.000731834	0.472472	34.2824	32.6939	50.0489	38.6281	21.7953	8.49842	12.2276	18.1222
Igfn1	-1.16276	0.00156166	0.593766	124.274	50.2983	38.823	50.8265	26.864	19.8297	36.6827	33.383
Ptgs2	-1.1579	0.00014355	0.229234	67.4934	45.2685	57.0651	52.8595	28.8915	11.3312	16.3034	30.5216
Gbp3	-1.15572	0.000953623	0.491239	104.99	62.8729	52.3876	31.1736	29.3983	31.1609	24.4552	25.7526
Prss12	-1.11232	0.023553	0.999875	24.6405	10.0597	40.2262	46.7603	9.63049	11.3312	12.2276	21.9374
Actl10	-1.0999	0.0572162	0.999875	12.8559	14.0835	13.0969	10.843	10.1374	2.83281	4.07586	2.8614
Ifit1	-1.09634	0.0185912	0.999875	64.2794	42.7536	16.8389	17.6198	14.6992	19.8297	8.15172	20.0298
Drd5	-1.08836	0.0706847	0.999875	14.9985	11.5686	7.95169	16.2645	10.1374	2.83281	4.07586	2.8614
Irf7	-1.08646	0.128369	0.999875	19.2838	15.0895	6.54845	3.38843	7.60302	2.83281	0	5.7228
Ifit3b	-1.07937	0.000503966	0.410673	156.413	98.5847	50.5166	83.3554	45.6181	42.4921	36.6827	52.459
Myo3b	-1.07446	0.00565323	0.893581	61.0655	27.1611	72.0329	43.3719	31.4258	14.164	8.15172	30.5216
Dgat2l6	-1.07183	0.0151938	0.999875	24.6405	17.6044	19.6453	14.2314	8.10988	5.66562	12.2276	10.4918
Egln3	-1.06528	0.0235537	0.999875	37.4963	31.185	16.8389	18.9752	20.2747	5.66562	8.15172	8.58419
Ifit3	-1.06447	0.0216547	0.999875	284.972	189.625	72.0329	99.6199	79.0714	73.653	65.2137	87.7495
Esm1	-1.06267	0.119825	0.999875	7.49927	15.5925	14.9679	6.77686	5.06868	0	0	11.4456
Stra6	-1.04653	0.0473716	0.999875	12.8559	36.2148	29.0003	23.0413	23.8228	2.83281	4.07586	9.53799
Gm11549	-1.0445	0.0304407	0.999875	56.7802	10.0597	38.823	48.1157	23.3159	5.66562	16.3034	22.8912
Clec7a	-1.04343	0.0214487	0.999875	40.7103	96.0698	55.6618	14.2314	33.4533	19.8297	28.531	18.1222
Sln	-1.043	0.215227	0.999875	12.8559	19.1134	2.33873	6.09917	10.6442	0	0	3.8152
Bmp3	-1.04276	0.0832917	0.999875	41.7816	21.1253	74.3717	118.595	44.0975	19.8297	20.3793	35.2906
Arhgap9	-1.03348	0.0946009	0.999875	11.7846	9.0537	7.95169	12.1983	6.58928	2.83281	0	5.7228
Dsp	-1.02076	0.0622209	0.999875	11.7846	19.6163	11.6937	20.3306	10.6442	2.83281	0	10.4918
Ntng2	-0.99929	3.58439e-05	0.145374	114.632	79.4714	132.372	116.562	52.7142	31.1609	61.1379	70.5812
NA	-0.988712	0.0731851	0.999875	18.2125	15.5925	8.88718	12.1983	10.1374	2.83281	4.07586	5.7228
C130074G19Rik	-0.988272	0.00102981	0.498332	96.4192	106.632	181.018	147.736	103.908	25.4953	61.1379	62.9508
Irgm2	-0.973601	0.021473	0.999875	76.064	42.2506	23.3873	24.3967	28.3846	16.9968	12.2276	19.076
Usp18	-0.973003	0.117292	0.999875	34.2824	17.1014	9.35493	4.7438	11.658	8.49842	4.07586	5.7228
Lgals3	-0.966638	0.0752603	0.999875	28.9257	33.1969	12.6292	9.48761	11.658	8.49842	0	16.2146
Nwd2	-0.965712	9.09234e-05	0.161328	168.198	99.0877	116.937	122.661	70.4546	33.9937	52.9862	83.9343
C130073E24Rik	-0.959494	0.0625345	0.999875	21.4265	17.6044	12.1614	9.48761	8.61675	11.3312	0	7.6304
Adamts8	-0.958039	0.0697483	0.999875	10.7132	11.5686	11.2259	13.5537	5.57554	5.66562	4.07586	7.6304
Sstr3	-0.957755	0.000950066	0.491239	49.2809	43.2566	44.4359	55.5703	29.9052	19.8297	16.3034	23.845
Gm10451	-0.955654	0.115561	0.999875	17.1412	13.0776	12.1614	6.77686	10.6442	2.83281	8.15172	1.9076
Gm15344	-0.946747	0.0481947	0.999875	11.7846	13.5805	21.0486	22.3636	10.6442	2.83281	8.15172	10.4918
Rsad2	-0.943603	0.0414776	0.999875	16.0699	21.1253	19.6453	12.876	10.1374	2.83281	8.15172	11.4456
Dnase1l1	-0.943326	0.0416095	0.999875	17.1412	27.1611	15.4356	12.1983	8.10988	8.49842	12.2276	10.4918
Klf10	-0.940675	0.00208044	0.692137	158.556	65.8908	110.856	124.017	84.6469	28.3281	44.8345	63.9046
Wfikkn2	-0.939619	0.214421	0.999875	10.7132	24.6462	3.74197	5.42149	10.6442	0	4.07586	4.769
H2-Q4	-0.936466	0.0186269	0.999875	33.211	36.7178	25.2583	14.9091	13.1786	16.9968	12.2276	15.2608
Fmo2	-0.925887	0.103978	0.999875	35.3537	55.8311	12.6292	8.13223	9.63049	5.66562	24.4552	20.9836
Gm44846	-0.924571	0.130188	0.999875	11.7846	15.5925	8.41944	13.5537	11.658	0	4.07586	4.769
Chp2	-0.922569	0.0952885	0.999875	17.1412	13.5805	23.3873	5.42149	6.58928	11.3312	12.2276	5.7228
Glt8d2	-0.920805	0.0299749	0.999875	24.6405	15.0895	46.3069	44.0496	15.7129	19.8297	8.15172	21.9374
Xkr7	-0.911276	0.0375008	0.999875	19.2838	12.5746	27.1293	27.1074	12.1648	5.66562	12.2276	13.3532
Calhm2	-0.907336	0.0313065	0.999875	14.9985	18.6104	19.6453	21.0083	10.6442	8.49842	8.15172	10.4918
H2-Q6	-0.901874	0.165537	0.999875	22.4978	16.0955	15.4356	4.06612	2.53434	5.66562	24.4552	6.6766
Slc17a7	-0.900311	0.017996	0.999875	1038.11	363.657	837.266	1124.28	467.839	308.776	542.089	482.622
Gnrh1	-0.878711	0.224065	0.999875	6.42794	4.52685	17.7744	6.77686	7.60302	0	4.07586	4.769
Ube2l6	-0.878562	0.0219219	0.999875	27.8544	24.1432	21.9841	18.2975	12.1648	8.49842	16.3034	13.3532
H2-Aa	-0.876744	0.249319	0.999875	16.0699	32.1909	0.935493	12.876	12.1648	0	8.15172	10.4918
Drd3	-0.876067	0.0494691	0.999875	24.6405	28.67	30.4035	10.843	13.6854	22.6625	4.07586	10.4918
Ighg2c	-0.873595	0.188429	0.999875	11.7846	4.52685	7.95169	14.9091	8.61675	2.83281	4.07586	2.8614
Cartpt	-0.864079	0.0115243	0.984178	64.2794	106.129	82.3234	39.3058	55.7554	42.4921	12.2276	38.152
Gm2238	-0.856591	0.130427	0.999875	7.49927	12.0716	10.2904	12.876	7.09615	0	8.15172	6.6766
Capg	-0.854253	0.0299296	0.999875	29.9971	37.2208	21.0486	23.0413	16.2198	5.66562	12.2276	20.9836
2900037B21Rik	-0.853939	0.143608	0.999875	18.2125	7.54475	14.0324	6.09917	7.09615	8.49842	4.07586	4.769
Hs3st2	-0.853646	0.0131293	0.999875	61.0655	30.179	75.3072	87.4215	45.1112	25.4953	44.8345	24.7988
Gm3086	-0.852029	0.138192	0.999875	5.35662	12.5746	17.3066	17.6198	4.56181	2.83281	8.15172	13.3532
Ly9	-0.851544	0.0949633	0.999875	16.0699	27.6641	19.6453	6.77686	8.61675	11.3312	16.3034	7.6304
Ccne1	-0.85045	0.00762911	0.931647	68.5647	52.8132	31.8068	46.0827	32.9464	28.3281	16.3034	24.7988
Rspo2	-0.846571	0.0824015	0.999875	10.7132	10.5626	28.5325	27.1074	10.1374	8.49842	12.2276	12.3994
Mc3r	-0.841388	0.127008	0.999875	8.57059	14.0835	12.6292	22.3636	12.1648	0	8.15172	7.6304
D030055H07Rik	-0.837691	0.164689	0.999875	12.8559	4.52685	15.4356	15.5868	5.57554	0	12.2276	9.53799
Rtp4	-0.831852	0.0566299	0.999875	68.5647	38.2267	19.1776	17.6198	19.7678	16.9968	24.4552	19.076
Mx2	-0.829225	0.142456	0.999875	34.2824	12.0716	8.41944	11.5207	11.1511	2.83281	8.15172	10.4918
Gm37694	-0.823975	0.120111	0.999875	13.9272	18.1074	14.0324	14.2314	8.61675	2.83281	0	15.2608
Nlrp3	-0.823894	0.151105	0.999875	18.2125	14.5865	8.41944	8.80992	10.6442	2.83281	4.07586	5.7228
Sstr2	-0.820979	0.00885266	0.938155	44.9956	37.7237	55.1941	65.7356	39.5357	25.4953	20.3793	21.9374
Shisa8	-0.818238	0.101895	0.999875	26.7831	19.6163	11.6937	10.843	9.12362	14.164	16.3034	4.769
Gnal	-0.817824	0.00493455	0.885392	3541.8	2599.42	4276.61	1860.93	1575.85	1753.51	2245.8	1402.09
C030018K13Rik	-0.816971	0.0723347	0.999875	32.1397	13.5805	49.1134	25.0744	21.7953	14.164	4.07586	20.0298
Islr	-0.813875	0.0438413	0.999875	19.2838	47.7834	23.3873	35.9174	24.8365	11.3312	12.2276	17.1684
Itgax	-0.811898	0.105927	0.999875	23.5691	51.3043	24.3228	8.13223	14.1923	8.49842	28.531	14.307
P2rx3	-0.807582	0.141854	0.999875	10.7132	12.5746	7.95169	10.1653	5.57554	8.49842	4.07586	5.7228
Gm45881	-0.806826	0.160336	0.999875	9.64192	11.0656	16.3711	6.09917	7.60302	5.66562	4.07586	5.7228
A830092H15Rik	-0.805809	0.110316	0.999875	11.7846	10.0597	19.6453	16.2645	10.1374	2.83281	16.3034	5.7228
Bdnf	-0.804988	0.00613501	0.907129	107.132	67.3998	70.6297	102.331	50.6868	45.3249	12.2276	71.535
Gm2065	-0.803224	0.0873321	0.999875	14.9985	14.5865	15.9034	11.5207	9.12362	5.66562	12.2276	6.6766
Isg15	-0.801902	0.151087	0.999875	42.853	16.0955	12.6292	6.77686	11.658	14.164	4.07586	11.4456
Snora31	-0.799344	0.167632	0.999875	10.7132	10.5626	15.4356	8.80992	7.09615	0	4.07586	10.4918
Tcerg1l	-0.797085	0.00520581	0.886436	67.4934	84.5012	75.3072	65.7356	63.3585	33.9937	20.3793	34.3368
Gm42527	-0.795323	0.203613	0.999875	7.49927	6.53878	11.2259	11.5207	6.08241	0	4.07586	7.6304
Gbp5	-0.792787	0.04095	0.999875	38.5677	37.2208	25.7261	15.5868	13.6854	19.8297	16.3034	19.076
Lat2	-0.79139	0.0437266	0.999875	26.7831	28.67	21.0486	20.3306	17.7404	8.49842	8.15172	14.307
Gm44891	-0.788073	0.177668	0.999875	4.2853	11.5686	16.8389	11.5207	7.60302	11.3312	4.07586	3.8152
Slc16a3	-0.787463	0.0587036	0.999875	33.211	35.2088	35.081	18.2975	24.3297	8.49842	4.07586	21.9374
Ifitm3	-0.782187	0.00585828	0.893581	91.0625	62.8729	58.0006	44.7273	43.0838	22.6625	40.7586	36.2444
9130230N09Rik	-0.779914	0.175544	0.999875	12.8559	9.55668	11.2259	6.77686	6.58928	8.49842	0	5.7228
Mas1	-0.77925	0.011533	0.984178	67.4934	41.2446	54.7263	33.8843	23.3159	22.6625	36.6827	34.3368
Psmb9	-0.77864	0.118376	0.999875	12.8559	17.6044	14.5001	9.48761	9.63049	11.3312	4.07586	5.7228
Pparg	-0.776646	0.188617	0.999875	9.64192	8.55072	10.2904	11.5207	9.12362	2.83281	4.07586	3.8152
C4b	-0.770985	0.0519041	0.999875	1356.3	2015.45	1272.27	509.62	779.563	685.539	876.31	681.013
Tuba8	-0.769077	0.0423768	0.999875	37.4963	20.1193	23.8551	27.7851	19.7678	8.49842	16.3034	14.307
Ighm	-0.765809	0.00700621	0.931647	143.557	103.112	307.777	154.512	126.717	104.814	89.6689	91.5647
Mir1898	-0.765318	0.182525	0.999875	9.64192	9.55668	12.6292	7.45455	6.08241	2.83281	4.07586	7.6304
Gpnmb	-0.76282	0.106247	0.999875	26.7831	57.8431	27.597	16.2645	31.9327	5.66562	16.3034	15.2608
Adam18	-0.759161	0.218677	0.999875	5.35662	7.54475	15.4356	10.843	6.58928	5.66562	0	7.6304
Gbp2	-0.758839	0.0526973	0.999875	36.425	59.352	32.7422	20.3306	30.9189	19.8297	16.3034	16.2146
Gucy1a2	-0.757319	0.0086926	0.938155	92.1339	58.3461	55.6618	48.7934	47.6456	25.4953	32.6069	34.3368
Npbwr1	-0.756874	0.251796	0.999875	6.42794	9.55668	9.82267	18.2975	12.6717	5.66562	0	2.8614
Otof	-0.755496	0.0754338	0.999875	363.179	419.991	157.631	140.959	135.334	209.628	142.655	154.515
Gm42047	-0.753689	0.00262914	0.702494	73.9214	115.183	131.904	78.6116	50.1799	48.1577	69.2896	73.4426
Prdm12	-0.750957	0.17816	0.999875	7.49927	11.0656	26.6615	12.876	11.1511	11.3312	0	8.58419
Myo15b	-0.750827	0.215516	0.999875	13.9272	6.0358	12.1614	8.13223	8.61675	2.83281	4.07586	4.769
Gm45533	-0.750805	0.200541	0.999875	10.7132	6.0358	11.2259	10.843	7.60302	2.83281	8.15172	3.8152
Cdh23	-0.750421	0.116472	0.999875	16.0699	20.6223	28.5325	8.13223	11.1511	14.164	8.15172	10.4918
Nlrc5	-0.748338	0.185706	0.999875	18.2125	32.1909	12.6292	10.1653	18.2472	5.66562	0	11.4456
Pdpn	-0.7475	0.0117778	0.984178	93.2052	201.696	87.4686	107.074	94.7843	48.1577	48.9103	84.8881
Tpx2	-0.745923	0.0651534	0.999875	16.0699	20.6223	29.9358	25.7521	18.2472	11.3312	8.15172	12.3994
Tbr1	-0.743887	0.00898852	0.938155	126.416	67.9027	115.533	189.074	85.1538	70.8202	93.7448	52.459
Glp1r	-0.737259	0.170714	0.999875	10.7132	15.0895	26.1938	9.48761	11.658	8.49842	0	11.4456
Gm37107	-0.73674	0.232881	0.999875	12.8559	7.04177	13.0969	7.45455	6.58928	2.83281	0	9.53799
Sidt1	-0.736286	0.180987	0.999875	101.776	109.65	118.34	140.281	96.3049	62.3218	8.15172	105.872
Adamtsl3	-0.733266	0.252271	0.999875	16.0699	11.0656	18.7099	10.843	17.7404	0	0	7.6304
Gm26843	-0.729183	0.145521	0.999875	18.2125	11.0656	13.5646	14.9091	10.1374	2.83281	4.07586	11.4456
1700030C10Rik	-0.728719	0.262576	0.999875	4.2853	8.04773	18.2421	7.45455	8.10988	2.83281	4.07586	5.7228
Cckbr	-0.7276	0.00897908	0.938155	65.3508	58.3461	98.2267	110.463	57.2761	56.6562	61.1379	32.4292
Tgm7	-0.727356	0.197705	0.999875	12.8559	10.5626	8.41944	7.45455	5.06868	5.66562	4.07586	7.6304
Avpr1a	-0.726553	0.232777	0.999875	9.64192	16.0955	11.6937	7.45455	11.1511	0	4.07586	6.6766
1700034P13Rik	-0.720809	0.189705	0.999875	14.9985	12.0716	7.95169	9.48761	5.57554	5.66562	16.3034	4.769
Oxtr	-0.720366	0.0239135	0.999875	36.425	38.2267	39.7584	37.9504	31.4258	25.4953	12.2276	16.2146
Prss53	-0.719921	0.172782	0.999875	10.7132	11.0656	10.7582	10.1653	6.58928	5.66562	4.07586	7.6304
Anxa9	-0.717731	0.108136	0.999875	16.0699	15.0895	19.1776	14.2314	11.658	2.83281	16.3034	8.58419
1700016P03Rik	-0.714305	0.246472	0.999875	92.1339	98.5847	203.937	93.5207	78.5645	22.6625	36.6827	152.608
Nptxr	-0.713978	0.000544191	0.410673	775.639	523.103	478.972	936.562	508.895	371.098	313.841	435.886
Stac	-0.713778	0.207849	0.999875	17.1412	14.5865	14.5001	9.48761	15.206	5.66562	0	5.7228
Gm45206	-0.709031	0.209011	0.999875	4.2853	14.0835	11.2259	12.876	5.57554	11.3312	4.07586	6.6766
Ccdc183	-0.708971	0.220128	0.999875	12.8559	8.04773	13.5646	7.45455	4.05494	2.83281	8.15172	10.4918
Lingo4	-0.708258	0.260586	0.999875	17.1412	17.1014	10.7582	3.38843	7.60302	16.9968	4.07586	2.8614
3110070M22Rik	-0.70793	0.276926	0.999875	2.14265	10.0597	10.7582	14.2314	5.57554	0	12.2276	6.6766
Doc2a	-0.707636	0.0205283	0.999875	44.9956	52.8132	39.2907	70.4794	41.0563	33.9937	16.3034	26.7064
Gm38375	-0.706264	0.227226	0.999875	10.7132	12.0716	9.35493	6.77686	6.58928	5.66562	0	7.6304
Nts	-0.704716	0.128785	0.999875	208.908	287.203	159.502	124.017	159.156	155.804	36.6827	119.225
Satb2	-0.701956	0.115234	0.999875	42.853	11.0656	43.0327	75.2232	27.8777	22.6625	36.6827	20.9836
Pdzrn3	-0.701745	0.0133685	0.999875	53.5662	38.7297	41.1617	54.8926	33.4533	22.6625	24.4552	27.6602
Sag	-0.700135	0.163657	0.999875	16.0699	18.1074	16.3711	6.77686	9.12362	14.164	4.07586	7.6304
Cenpp	-0.69954	0.119615	0.999875	32.1397	19.1134	20.1131	12.1983	15.7129	19.8297	4.07586	8.58419
Gm8995	-0.697195	0.0613937	0.999875	37.4963	34.7058	29.9358	16.9422	21.2884	19.8297	8.15172	18.1222
Vim	-0.695682	0.0898688	0.999875	237.834	476.828	253.051	184.331	272.188	116.145	130.427	183.129
Cela1	-0.693453	0.158283	0.999875	18.2125	24.1432	8.88718	12.1983	10.1374	5.66562	12.2276	10.4918
Asprv1	-0.693217	0.277714	0.999875	7.49927	9.55668	6.0807	15.5868	6.58928	2.83281	0	9.53799
Ncf4	-0.692177	0.262895	0.999875	6.42794	14.5865	12.6292	4.7438	4.05494	8.49842	12.2276	4.769
Gm16183	-0.691402	0.0861156	0.999875	17.1412	29.676	33.21	18.2975	13.1786	8.49842	16.3034	21.9374
Gm37121	-0.690582	0.313016	0.999875	10.7132	12.0716	11.6937	2.03306	5.06868	0	8.15172	8.58419
Gm31305	-0.690436	0.0216015	0.999875	37.4963	39.2327	44.9037	35.2397	29.9052	14.164	24.4552	22.8912
Fadd	-0.689064	0.123458	0.999875	20.3552	23.1372	16.8389	17.6198	18.2472	14.164	4.07586	6.6766
Gm37277	-0.686565	0.0832844	0.999875	28.9257	27.1611	36.4842	21.0083	19.7678	2.83281	40.7586	13.3532
Ikzf3	-0.678414	0.248016	0.999875	11.7846	6.0358	16.8389	6.77686	5.57554	5.66562	12.2276	5.7228
Smim27	-0.678334	0.340898	0.999875	11.7846	10.0597	5.14521	8.80992	10.1374	0	0	5.7228
Sstr4	-0.675082	0.0812119	0.999875	35.3537	21.1253	58.0006	43.3719	34.467	22.6625	8.15172	23.845
Rasl10a	-0.673913	0.0228577	0.999875	66.4221	34.2029	68.7587	52.1818	38.0151	31.1609	24.4552	37.1982
H2-Ab1	-0.673368	0.41673	0.999875	3.21397	25.6521	1.87099	4.7438	2.53434	5.66562	12.2276	5.7228
Ctgf	-0.669666	0.336192	0.999875	49.2809	28.67	49.1134	90.1322	45.6181	2.83281	61.1379	27.6602
Traf1	-0.667063	0.207293	0.999875	10.7132	13.5805	16.8389	12.1983	13.1786	2.83281	4.07586	7.6304
Gm26668	-0.665768	0.310931	0.999875	3.21397	16.0955	9.35493	6.77686	6.58928	8.49842	0	5.7228
Lgals3bp	-0.665548	0.120756	0.999875	267.831	174.032	84.6621	104.364	138.375	84.9842	85.593	82.9805
Gna15	-0.662205	0.141608	0.999875	24.6405	21.1253	13.5646	14.2314	11.1511	2.83281	12.2276	16.2146
Gm14634	-0.661819	0.218703	0.999875	14.9985	11.0656	6.54845	11.5207	6.58928	8.49842	8.15172	5.7228
Atp2b4	-0.661435	6.42493e-05	0.161328	771.353	845.515	1120.72	1091.07	768.918	552.398	611.379	480.715
Blnk	-0.659863	0.0432086	0.999875	31.0684	32.6939	31.8068	37.2727	25.8503	8.49842	20.3793	21.9374
NA	-0.656599	0.121191	0.999875	26.7831	18.6104	13.5646	18.2975	13.1786	14.164	16.3034	7.6304
Ccl6	-0.654616	0.0907003	0.999875	32.1397	46.7774	26.6615	19.6529	23.3159	11.3312	12.2276	24.7988
Sp110	-0.653639	0.224288	0.999875	13.9272	18.6104	14.5001	6.77686	8.10988	19.8297	0	6.6766
Stard8	-0.653302	0.00631947	0.925831	52.4949	79.9743	75.7749	79.967	50.1799	59.489	32.6069	40.0596
Kcng2	-0.652905	0.176026	0.999875	11.7846	20.6223	17.7744	16.9422	16.2198	11.3312	0	8.58419
Samd9l	-0.652658	0.0140556	0.999875	64.2794	61.364	50.0489	39.9835	34.467	39.6593	36.6827	29.5678
Slfn5	-0.652635	0.0689826	0.999875	54.6375	27.6641	34.6132	24.3967	16.2198	33.9937	20.3793	22.8912
Ccdc110	-0.652072	0.221712	0.999875	9.64192	8.04773	10.7582	12.876	7.09615	5.66562	8.15172	5.7228
Gm26604	-0.650638	0.290373	0.999875	4.2853	8.55072	13.0969	9.48761	5.06868	8.49842	0	7.6304
Nr4a1	-0.650293	0.0678838	0.999875	617.083	291.73	741.846	450.661	342.136	220.959	309.765	458.778
Gm11400	-0.647259	0.256551	0.999875	12.8559	5.53282	8.41944	14.9091	5.06868	8.49842	8.15172	6.6766
Ccdc155	-0.646573	0.141283	0.999875	22.4978	13.5805	19.1776	15.5868	8.10988	5.66562	20.3793	14.307
Nlrp10	-0.645523	0.256076	0.999875	12.8559	14.5865	29.468	4.7438	12.6717	5.66562	8.15172	10.4918
Pcdh8	-0.643642	0.014278	0.999875	88.9199	160.452	83.2589	117.24	89.7156	82.1514	69.2896	47.69
Gm42507	-0.643327	0.230049	0.999875	12.8559	8.04773	11.6937	11.5207	5.57554	2.83281	8.15172	10.4918
Gm13713	-0.641562	0.242927	0.999875	10.7132	16.0955	13.0969	8.80992	12.6717	5.66562	4.07586	4.769
Zdhhc23	-0.640399	0.0546967	0.999875	51.4236	45.7715	88.4041	46.7603	47.1387	28.3281	12.2276	46.7362
Efcab6	-0.637116	0.111735	0.999875	21.4265	22.6342	41.1617	39.3058	26.864	2.83281	24.4552	20.9836
Lrrc26	-0.634753	0.326042	0.999875	10.7132	9.0537	13.5646	2.71074	6.58928	2.83281	12.2276	3.8152
4930417O13Rik	-0.634739	0.241385	0.999875	7.49927	13.5805	15.9034	8.13223	7.60302	5.66562	4.07586	9.53799
Tll1	-0.630909	0.104539	0.999875	19.2838	27.1611	16.8389	24.3967	13.1786	14.164	24.4552	11.4456
Mamdc2	-0.63088	0.195648	0.999875	13.9272	24.1432	7.95169	16.9422	10.1374	11.3312	8.15172	10.4918
Robo3	-0.62815	0.245456	0.999875	84.6346	19.6163	124.888	78.6116	53.2211	39.6593	61.1379	45.7824
Adra2a	-0.627019	0.0732457	0.999875	35.3537	91.04	57.5328	63.0248	61.331	39.6593	12.2276	34.3368
Gm34583	-0.626234	0.0737621	0.999875	22.4978	21.6283	31.8068	27.1074	17.7404	14.164	16.3034	17.1684
Gm11110	-0.625164	0.311655	0.999875	8.57059	9.55668	7.95169	9.48761	8.10988	2.83281	0	6.6766
Npas4	-0.625145	0.123918	0.999875	162.841	133.291	338.648	170.099	152.567	67.9874	175.262	126.855
Gm43850	-0.624676	0.288553	0.999875	6.42794	14.0835	7.48394	7.45455	6.08241	5.66562	8.15172	4.769
Ntn1	-0.622262	0.0102794	0.966261	112.489	96.0698	71.0975	70.4794	55.2486	76.4858	61.1379	42.921
Neurod6	-0.62193	0.333436	0.999875	71.7787	45.2685	159.502	180.264	83.6332	22.6625	57.062	128.763
Slc2a10	-0.621496	0.246486	0.999875	7.49927	18.6104	13.5646	12.876	10.6442	0	8.15172	11.4456
Dlk1	-0.619852	0.0188495	0.999875	140.343	277.647	149.679	224.314	168.787	169.968	85.593	85.8419
Pla1a	-0.618509	0.26931	0.999875	12.8559	12.0716	6.54845	15.5868	9.12362	0	8.15172	9.53799
Slfn9	-0.617625	0.249025	0.999875	17.1412	11.5686	9.82267	7.45455	9.12362	8.49842	4.07586	5.7228
Mir3074-1	-0.617481	0.272618	0.999875	7.49927	8.04773	18.7099	12.1983	6.08241	5.66562	4.07586	12.3994
Gbp6	-0.616576	0.144262	0.999875	27.8544	43.2566	21.0486	14.9091	13.6854	31.1609	16.3034	14.307
Fzd3	-0.615621	0.000186996	0.271467	219.621	215.78	224.986	257.521	176.39	141.64	97.8206	153.562
Scn5a	-0.61335	0.0166657	0.999875	69.6361	111.159	107.582	90.1322	84.6469	50.9905	32.6069	61.0432
Nrp2	-0.610986	0.00322021	0.702494	266.76	338.005	181.953	222.959	191.596	186.965	110.048	157.377
Klhl35	-0.609196	0.180036	0.999875	18.2125	16.0955	15.9034	14.9091	8.10988	25.4953	4.07586	8.58419
4833445I07Rik	-0.607015	0.143911	0.999875	17.1412	24.6462	31.339	16.9422	18.7541	8.49842	8.15172	17.1684
Spi1	-0.605958	0.10193	0.999875	26.7831	39.2327	29.9358	17.6198	17.2335	22.6625	28.531	14.307
Msantd1	-0.6047	0.0671328	0.999875	37.4963	33.1969	27.1293	33.8843	25.8503	14.164	12.2276	23.845
Gm15609	-0.603766	0.156965	0.999875	22.4978	14.5865	20.1131	14.2314	11.1511	8.49842	8.15172	15.2608
Lck	-0.603655	0.209376	0.999875	14.9985	15.5925	12.6292	14.9091	7.60302	0	16.3034	14.307
Neurod2	-0.603516	0.0902256	0.999875	50.3522	38.7297	73.4362	71.8347	36.4945	14.164	24.4552	66.766
2610028E06Rik	-0.602945	0.201633	0.999875	10.7132	24.6462	27.597	12.876	12.6717	14.164	24.4552	6.6766
Dusp14	-0.601605	0.00226168	0.702494	194.981	153.41	259.132	157.223	129.251	135.975	105.972	127.809
Fhl2	-0.601506	0.0988576	0.999875	80.3493	30.682	67.3555	77.9339	54.2348	11.3312	36.6827	54.3666
Mmp19	-0.600577	0.306022	0.999875	8.57059	12.5746	7.0162	8.13223	5.57554	8.49842	0	7.6304
6430584L05Rik	-0.6004	0.0590747	0.999875	26.7831	29.676	34.6132	31.1736	19.261	14.164	32.6069	20.0298
Vwf	-0.599679	0.156946	0.999875	35.3537	56.8371	23.3873	14.9091	19.261	14.164	36.6827	20.9836
Xlr	-0.599262	0.180824	0.999875	22.4978	14.0835	13.0969	12.876	9.12362	11.3312	8.15172	11.4456
Tmub1	-0.598473	0.0344954	0.999875	61.0655	55.3282	47.7101	35.9174	34.467	48.1577	20.3793	27.6602
Hck	-0.598343	0.151159	0.999875	33.211	22.6342	26.1938	16.2645	22.3022	2.83281	16.3034	16.2146
Htr1a	-0.598139	0.0396769	0.999875	63.2081	91.04	118.808	79.2893	79.5782	79.3186	32.6069	36.2444
Tubb6	-0.597542	0.0576327	0.999875	52.4949	56.8371	48.1779	25.7521	24.8365	33.9937	40.7586	29.5678
Plscr1	-0.597209	0.0738806	0.999875	25.7118	29.173	23.8551	26.4298	16.2198	19.8297	16.3034	18.1222
Sp100	-0.596002	0.107823	0.999875	33.211	27.1611	21.9841	23.719	12.6717	33.9937	12.2276	16.2146
Chrdl1	-0.594575	0.0333136	0.999875	94.2765	51.8073	103.84	90.1322	62.8516	33.9937	40.7586	72.4888
Igfbp6	-0.594299	0.09245	0.999875	62.1368	29.676	84.6621	50.1488	48.1524	14.164	40.7586	40.0596
St3gal1	-0.594171	0.00813973	0.931647	59.9941	72.4296	87.4686	93.5207	51.7005	59.489	52.9862	48.6438
Ifih1	-0.593499	0.0368842	0.999875	51.4236	45.2685	35.5487	36.595	29.3983	22.6625	24.4552	29.5678
Kcnq4	-0.592135	0.0914794	0.999875	41.7816	31.185	25.7261	31.8512	27.3709	11.3312	12.2276	23.845
Ifi204	-0.591161	0.390689	0.999875	31.0684	13.0776	7.48394	2.71074	10.1374	5.66562	20.3793	2.8614
Lefty1	-0.59098	0.317975	0.999875	18.2125	9.55668	12.1614	7.45455	10.6442	2.83281	0	10.4918
9430025C20Rik	-0.590455	0.158985	0.999875	14.9985	13.5805	19.1776	21.0083	10.6442	14.164	8.15172	12.3994
Ssc5d	-0.590342	0.0921345	0.999875	29.9971	26.6581	38.3552	19.6529	20.2747	16.9968	16.3034	20.0298
Tgfb1i1	-0.590309	0.151375	0.999875	21.4265	24.6462	29.9358	25.7521	22.3022	11.3312	0	21.9374
Dok2	-0.590286	0.276074	0.999875	11.7846	8.04773	16.8389	10.843	7.09615	0	12.2276	11.4456
Tsku	-0.589989	0.238236	0.999875	14.9985	14.5865	9.82267	23.719	15.7129	5.66562	8.15172	7.6304
Fezf2	-0.588781	0.0907142	0.999875	23.5691	29.173	49.5811	46.0827	28.3846	14.164	20.3793	29.5678
Pcsk5	-0.588393	0.058547	0.999875	26.7831	34.2029	52.8553	51.5041	27.8777	22.6625	32.6069	28.614
Tmc3	-0.585971	0.267606	0.999875	8.57059	11.5686	16.8389	8.13223	9.12362	5.66562	8.15172	6.6766
Aanat	-0.584126	0.280271	0.999875	8.57059	8.55072	16.8389	8.80992	6.58928	5.66562	8.15172	8.58419
4921504A21Rik	-0.582471	0.135373	0.999875	23.5691	24.6462	17.7744	19.6529	12.6717	8.49842	12.2276	20.0298
Gm10535	-0.579523	0.371566	0.999875	7.49927	5.02983	16.3711	10.1653	9.12362	0	4.07586	8.58419
Tnfrsf1b	-0.579116	0.0697554	0.999875	38.5677	43.2566	29.468	25.7521	20.2747	25.4953	20.3793	25.7526
Clec4a2	-0.578371	0.354069	0.999875	11.7846	9.55668	6.0807	10.1653	5.57554	2.83281	0	11.4456
Gpr63	-0.577027	0.0503063	0.999875	49.2809	44.2625	47.7101	50.8265	21.7953	31.1609	24.4552	48.6438
Rgs12	-0.576787	8.11014e-05	0.161328	248.547	227.348	259.599	275.141	162.198	144.473	224.172	165.007
Trim5	-0.576398	0.289893	0.999875	14.9985	20.6223	15.9034	8.13223	6.08241	2.83281	8.15172	20.0298
Gm16075	-0.57527	0.373766	0.999875	6.42794	4.52685	17.7744	8.80992	6.58928	2.83281	16.3034	3.8152
Amn	-0.574926	0.205789	0.999875	11.7846	17.1014	15.9034	12.1983	10.6442	11.3312	12.2276	6.6766
Apobec1	-0.573969	0.0964698	0.999875	38.5677	53.8192	33.6777	26.4298	33.4533	25.4953	28.531	15.2608
Csf2rb	-0.573052	0.245976	0.999875	19.2838	17.6044	18.2421	7.45455	14.6992	8.49842	12.2276	5.7228
Tpbgl	-0.571188	0.148575	0.999875	26.7831	21.6283	22.4518	41.3389	17.7404	25.4953	32.6069	9.53799
6530402F18Rik	-0.570321	0.0299497	0.999875	99.6331	47.2804	91.2106	81.3223	48.6593	59.489	65.2137	48.6438
Nfkbid	-0.569912	0.173306	0.999875	18.2125	18.1074	28.5325	25.0744	18.2472	14.164	0	19.076
Gabre	-0.56765	0.348748	0.999875	10.7132	26.6581	4.67746	23.719	19.7678	5.66562	8.15172	6.6766
Pcdhac1	-0.56728	0.268857	0.999875	16.0699	10.5626	8.41944	22.3636	12.1648	11.3312	4.07586	7.6304
Gm20712	-0.56674	0.237278	0.999875	18.2125	15.0895	20.5808	10.843	14.6992	16.9968	0	7.6304
Il1a	-0.565452	0.273317	0.999875	10.7132	9.55668	13.5646	10.843	6.08241	2.83281	16.3034	8.58419
1110032F04Rik	-0.5636	0.130196	0.999875	22.4978	28.67	27.1293	31.8512	26.864	11.3312	24.4552	10.4918
Tgfb1	-0.560304	0.109971	0.999875	21.4265	31.6879	21.0486	26.4298	17.7404	16.9968	20.3793	15.2608
Crhbp	-0.559552	0.0547721	0.999875	40.7103	44.2625	39.7584	55.5703	37.0013	31.1609	12.2276	30.5216
Styk1	-0.55905	0.513066	0.999875	1.07132	9.55668	18.7099	7.45455	15.206	0	0	4.769
3300002P13Rik	-0.558234	0.0248173	0.999875	64.2794	65.3878	48.6456	65.0579	44.6044	48.1577	20.3793	41.9672
C230057M02Rik	-0.556898	0.0369996	0.999875	76.064	57.8431	115.533	95.5537	52.7142	56.6562	93.7448	47.69
Fgf2os	-0.556886	0.324725	0.999875	12.8559	11.0656	7.95169	6.09917	5.57554	11.3312	4.07586	5.7228
Myd88	-0.554757	0.0872957	0.999875	46.0669	36.7178	26.6615	38.6281	29.3983	28.3281	8.15172	24.7988
Gm37776	-0.55392	0.193331	0.999875	11.7846	18.6104	27.597	23.0413	12.1648	16.9968	4.07586	19.076
Gpx7	-0.553409	0.191991	0.999875	21.4265	26.6581	17.7744	16.2645	12.6717	16.9968	0	20.0298
H2-Q7	-0.552865	0.336063	0.999875	18.2125	18.1074	9.82267	3.38843	7.60302	11.3312	8.15172	7.6304
2900093K20Rik	-0.55249	0.296292	0.999875	18.2125	14.0835	10.2904	6.09917	9.63049	5.66562	8.15172	7.6304
Gm44645	-0.551263	0.293522	0.999875	18.2125	14.5865	8.88718	21.0083	13.1786	5.66562	0	15.2608
H2-T10	-0.549721	0.322491	0.999875	13.9272	12.0716	11.6937	4.7438	7.09615	2.83281	12.2276	7.6304
Gm44321	-0.549045	0.34137	0.999875	17.1412	10.5626	5.14521	12.876	8.10988	11.3312	12.2276	2.8614
Rras	-0.548908	0.0714323	0.999875	54.6375	47.7834	39.2907	33.2066	34.9739	42.4921	20.3793	20.0298
Syne4	-0.547171	0.0930412	0.999875	42.853	38.7297	49.5811	31.8512	25.8503	11.3312	24.4552	41.9672
Nes	-0.546516	0.0576669	0.999875	37.4963	51.3043	35.5487	38.6281	28.8915	25.4953	20.3793	31.4754
Gm26594	-0.54538	0.322956	0.999875	7.49927	12.5746	13.5646	10.843	12.1648	2.83281	8.15172	4.769
AI606473	-0.544717	0.221137	0.999875	33.211	22.1313	11.6937	18.2975	12.1648	28.3281	8.15172	11.4456
Schip1	-0.543697	0.00317388	0.702494	126.416	111.159	115.066	113.851	88.7019	53.8233	81.5172	82.9805
NA	-0.543555	0.181944	0.999875	29.9971	20.6223	20.5808	20.3306	22.3022	8.49842	8.15172	14.307
Anxa2	-0.543509	0.0960138	0.999875	55.7088	102.106	56.5973	64.3802	67.4134	22.6625	24.4552	59.1356
Sox1ot	-0.542995	0.00270081	0.702494	253.904	362.651	359.229	258.876	248.872	164.303	175.262	236.542
Gm42568	-0.542836	0.345876	0.999875	5.35662	19.6163	9.82267	15.5868	5.57554	22.6625	4.07586	6.6766
Naip2	-0.542332	0.159031	0.999875	39.639	23.6402	23.3873	16.9422	16.2198	11.3312	16.3034	22.8912
Stx1a	-0.541336	0.00692896	0.931647	357.822	187.613	331.632	370.017	237.721	181.3	220.096	209.836
Gm14038	-0.539944	0.259562	0.999875	18.2125	12.5746	9.82267	13.5537	7.09615	8.49842	8.15172	12.3994
Cd72	-0.539321	0.235435	0.999875	33.211	10.0597	29.9358	18.9752	15.7129	28.3281	8.15172	11.4456
Snhg15	-0.538688	0.216622	0.999875	10.7132	20.6223	23.8551	17.6198	12.6717	2.83281	20.3793	15.2608
Adam33	-0.537857	0.277436	0.999875	21.4265	12.5746	14.5001	12.876	15.206	0	12.2276	9.53799
H2-Q2	-0.537392	0.305129	0.999875	10.7132	12.0716	18.2421	25.7521	17.7404	2.83281	4.07586	13.3532
Pdyn	-0.537147	0.000880984	0.491239	535.662	539.198	549.602	361.884	340.108	362.599	407.586	280.417
Myoc	-0.537109	0.466933	0.999875	51.4236	54.3222	13.0969	22.3636	23.8228	14.164	4.07586	49.5976
NA	-0.537067	0.00258962	0.702494	587.086	503.989	454.65	454.05	464.291	277.615	240.476	353.86
Hspb6	-0.535466	0.129417	0.999875	48.2096	32.1909	27.597	27.1074	30.4121	22.6625	8.15172	20.9836
Fcgr2b	-0.535061	0.0990811	0.999875	61.0655	107.135	49.5811	39.3058	54.2348	48.1577	40.7586	33.383
Krt20	-0.534855	0.148083	0.999875	47.1383	42.7536	26.1938	21.686	14.6992	31.1609	32.6069	24.7988
Rhoh	-0.534751	0.296883	0.999875	9.64192	16.0955	9.35493	10.843	7.60302	2.83281	12.2276	9.53799
S1pr3	-0.534348	0.0984258	0.999875	42.853	62.8729	47.2424	27.7851	37.5082	19.8297	44.8345	24.7988
Tmem215	-0.533175	0.305312	0.999875	36.425	35.2088	4.20972	37.2727	23.8228	14.164	16.3034	20.0298
Xkr4	-0.533034	0.022095	0.999875	246.405	217.792	164.179	213.471	142.43	169.968	52.9862	192.667
Osmr	-0.53233	0.134881	0.999875	42.853	92.0459	54.7263	25.7521	39.5357	25.4953	48.9103	37.1982
Egr1	-0.532096	0.0880895	0.999875	1108.82	576.922	1314.37	1081.59	550.965	620.385	1027.12	637.138
Tex15	-0.531401	0.223235	0.999875	18.2125	21.1253	12.1614	15.5868	8.61675	16.9968	16.3034	10.4918
Gm3052	-0.530452	0.372837	0.999875	16.0699	7.04177	10.2904	7.45455	10.6442	2.83281	4.07586	5.7228
Gapdhs	-0.530282	0.070916	0.999875	44.9956	40.2387	73.4362	39.3058	33.9601	31.1609	36.6827	36.2444
Ttc9b	-0.52963	0.00314256	0.702494	176.768	124.74	154.824	151.124	118.607	96.3155	85.593	103.01
Mfng	-0.529563	0.182302	0.999875	25.7118	22.1313	14.5001	22.3636	15.7129	11.3312	8.15172	17.1684
Tac1	-0.528529	0.000431762	0.405577	1430.22	1218.73	1422.42	884.38	770.439	824.347	925.22	923.278
Dok1	-0.526833	0.314532	0.999875	12.8559	8.04773	10.7582	14.2314	10.1374	5.66562	4.07586	7.6304
Greb1l	-0.526133	0.0229388	0.999875	82.4919	96.5728	64.0813	82.6777	57.7829	39.6593	48.9103	68.6736
Txnrd3	-0.526084	0.147448	0.999875	28.9257	36.2148	16.8389	37.2727	23.3159	22.6625	16.3034	18.1222
Tmem200c	-0.525538	0.114882	0.999875	46.0669	46.7774	26.6615	26.4298	28.8915	28.3281	24.4552	19.076
Syk	-0.525193	0.0993127	0.999875	37.4963	45.2685	40.2262	29.8182	34.9739	22.6625	32.6069	16.2146
Tmem106a	-0.525024	0.346034	0.999875	13.9272	12.5746	7.0162	7.45455	8.61675	2.83281	8.15172	6.6766
Cchcr1	-0.524677	0.0942805	0.999875	23.5691	46.2745	40.6939	40.6612	27.3709	14.164	36.6827	28.614
Fcgr1	-0.524353	0.0721771	0.999875	52.4949	43.7595	33.6777	32.5289	27.3709	31.1609	32.6069	24.7988
2610316D01Rik	-0.523564	0.0665064	0.999875	63.2081	48.2864	50.9844	67.0909	48.1524	33.9937	12.2276	46.7362
Necab3	-0.522984	0.0117046	0.984178	124.274	102.106	77.1782	103.008	74.0027	65.1546	65.2137	70.5812
Cxcl5	-0.522125	0.216492	0.999875	20.3552	31.185	29.468	14.2314	18.2472	5.66562	12.2276	23.845
Frmd7	-0.522039	0.320451	0.999875	12.8559	15.0895	15.4356	9.48761	13.6854	0	8.15172	9.53799
Kcna5	-0.522026	0.00795935	0.931647	136.058	109.147	121.146	105.719	95.798	65.1546	101.896	65.8122
Slc26a5	-0.52201	0.307113	0.999875	10.7132	10.0597	11.6937	10.843	5.57554	11.3312	4.07586	9.53799
NA	-0.52182	0.11424	0.999875	48.2096	40.7416	29.0003	24.3967	22.3022	36.8265	20.3793	21.9374
Gm12371	-0.521511	0.253245	0.999875	29.9971	20.6223	11.2259	16.9422	18.2472	14.164	4.07586	11.4456
Kcnk9	-0.521247	0.0312041	0.999875	58.9228	76.4535	58.4683	90.1322	56.7692	45.3249	52.9862	41.9672
NA	-0.521019	0.191742	0.999875	16.0699	29.173	26.6615	23.719	23.8228	5.66562	16.3034	15.2608
Ccdc27	-0.520121	0.363866	0.999875	19.2838	9.0537	9.35493	8.80992	11.658	11.3312	0	4.769
Ano1	-0.519668	0.147812	0.999875	29.9971	60.358	77.1782	48.1157	46.6318	19.8297	16.3034	54.3666
NA	-0.519062	0.411942	0.999875	13.9272	11.5686	7.95169	2.71074	7.60302	5.66562	4.07586	5.7228
Ryr1	-0.518899	0.0272471	0.999875	382.463	302.796	607.135	264.298	257.996	237.956	383.131	225.097
Map3k6	-0.518171	0.251239	0.999875	23.5691	19.6163	10.7582	18.2975	17.2335	8.49842	8.15172	10.4918
Bend5	-0.517943	0.057781	0.999875	38.5677	46.2745	36.0165	46.7603	30.4121	33.9937	28.531	25.7526
Gprin1	-0.516773	0.0160142	0.999875	190.696	211.253	144.534	215.504	179.431	130.309	122.276	91.5647
Ccnf	-0.516737	0.179371	0.999875	20.3552	20.1193	18.2421	21.686	14.1923	5.66562	16.3034	17.1684
Tnfrsf8	-0.516688	0.433269	0.999875	1.07132	13.0776	11.6937	12.1983	10.1374	2.83281	8.15172	4.769
C3	-0.516165	0.167593	0.999875	67.4934	75.4475	45.3714	25.7521	58.7967	28.3281	20.3793	30.5216
Fosl2	-0.51535	0.0564783	0.999875	216.407	153.913	246.035	117.24	126.21	93.4827	77.4413	196.483
Nptx1	-0.513962	0.009592	0.957341	369.607	260.545	431.262	473.703	338.588	229.457	289.386	212.697
Sema5b	-0.513713	0.00260323	0.702494	149.985	137.817	164.179	126.727	99.8529	82.1514	114.124	108.733
1700001L19Rik	-0.513669	0.0683295	0.999875	52.4949	62.3699	73.9039	65.7356	63.3585	33.9937	20.3793	42.921
Lrmp	-0.513612	0.253177	0.999875	18.2125	15.0895	29.9358	10.1653	13.1786	14.164	12.2276	12.3994
Slc30a2	-0.513408	0.333105	0.999875	18.2125	6.0358	13.0969	12.876	7.60302	2.83281	12.2276	11.4456
Ltbr	-0.512886	0.17794	0.999875	39.639	46.7774	23.8551	33.2066	36.4945	14.164	8.15172	27.6602
Thbd	-0.51256	0.214451	0.999875	16.0699	19.6163	25.7261	18.2975	11.1511	11.3312	8.15172	21.9374
9430064I24Rik	-0.512126	0.302565	0.999875	18.2125	18.1074	18.7099	10.1653	17.2335	8.49842	0	11.4456
Casp12	-0.51186	0.354495	0.999875	10.7132	11.0656	8.41944	10.843	7.09615	0	20.3793	5.7228
Runx2	-0.511802	0.0914638	0.999875	36.425	30.682	40.6939	36.595	26.3571	14.164	44.8345	21.9374
Gng4	-0.511215	0.00609015	0.907129	271.045	265.072	198.792	258.198	225.556	164.303	114.124	163.1
Bst2	-0.508785	0.285927	0.999875	77.1353	41.7476	17.7744	14.9091	36.4945	14.164	20.3793	27.6602
Kcnj6	-0.508166	0.0545355	0.999875	44.9956	59.352	58.4683	63.0248	48.6593	33.9937	20.3793	41.9672
Airn	-0.507652	0.34628	0.999875	13.9272	8.55072	13.0969	6.77686	9.12362	5.66562	8.15172	5.7228
Gfap	-0.506686	0.157477	0.999875	3455.02	4926.72	2513.67	1444.83	2598.2	2033.96	2070.54	1980.09
Oxt	-0.506574	0.735816	0.999875	23.5691	34.7058	0.467746	113.851	82.1126	11.3312	0	25.7526
Dram1	-0.506562	0.222289	0.999875	17.1412	16.0955	21.0486	22.3636	18.2472	5.66562	12.2276	12.3994
Myo5b	-0.506498	0.0116207	0.984178	326.754	319.897	507.973	388.314	334.026	164.303	313.841	266.11
Lamc2	-0.506217	0.126367	0.999875	42.853	27.6641	24.7906	35.2397	17.7404	19.8297	32.6069	25.7526
Arl5c	-0.505687	0.181953	0.999875	22.4978	22.6342	26.1938	17.6198	15.206	16.9968	28.531	10.4918
Irak3	-0.505242	0.158796	0.999875	23.5691	22.6342	29.9358	23.0413	13.6854	14.164	32.6069	18.1222
Myh11	-0.503344	0.327692	0.999875	10.7132	19.1134	11.2259	8.13223	6.08241	14.164	8.15172	9.53799
Gm44899	-0.500682	0.355116	0.999875	16.0699	10.5626	9.35493	6.09917	8.10988	5.66562	8.15172	6.6766
Epop	-0.500507	0.0917591	0.999875	69.6361	38.2267	58.0006	84.0331	47.6456	22.6625	65.2137	41.9672
Pstpip1	-0.500472	0.229224	0.999875	16.0699	20.1193	14.9679	14.9091	11.658	11.3312	8.15172	13.3532
Hoga1	-0.50007	0.289045	0.999875	17.1412	12.0716	12.6292	15.5868	13.6854	8.49842	4.07586	8.58419
Nr4a3	-0.499319	0.441613	0.999875	199.266	103.615	170.727	82.6777	63.8653	53.8233	36.6827	232.727
Gm38300	-0.499001	0.424232	0.999875	10.7132	8.04773	12.6292	4.7438	8.61675	11.3312	4.07586	1.9076
Pik3ap1	-0.498884	0.178483	0.999875	31.0684	26.6581	20.1131	18.2975	20.2747	14.164	20.3793	12.3994
Arg2	-0.498633	0.0759729	0.999875	78.2067	38.2267	87.0008	63.7025	46.125	39.6593	57.062	47.69
Cd52	-0.497971	0.238569	0.999875	33.211	44.7655	27.597	10.1653	20.2747	14.164	24.4552	22.8912
Poc1a	-0.496464	0.128291	0.999875	53.5662	34.7058	42.5649	37.9504	24.8365	31.1609	61.1379	19.076
Cdhr1	-0.496349	0.201207	0.999875	28.9257	22.6342	27.1293	37.9504	12.6717	36.8265	32.6069	14.307
Spag6	-0.496208	0.41159	0.999875	8.57059	5.02983	14.0324	12.876	11.1511	5.66562	8.15172	2.8614
Ltbp1	-0.49551	0.114289	0.999875	28.9257	26.1551	32.2745	34.562	24.3297	22.6625	20.3793	18.1222
Dusp6	-0.495164	0.00739677	0.931647	253.904	171.517	297.954	271.752	186.02	141.64	191.565	182.176
Cxcl12	-0.494113	0.0526887	0.999875	85.7059	140.835	83.7266	70.4794	67.4134	59.489	97.8206	57.228
Dph2	-0.493352	0.0429246	0.999875	76.064	60.358	57.5328	52.8595	38.5219	36.8265	40.7586	54.3666
Psme2b	-0.493009	0.162464	0.999875	32.1397	37.7237	29.468	23.0413	29.3983	11.3312	16.3034	20.9836
Gm13421	-0.492756	0.402271	0.999875	7.49927	10.5626	12.6292	6.09917	6.08241	2.83281	4.07586	10.4918
Pde4c	-0.492544	0.228363	0.999875	24.6405	13.5805	21.0486	16.9422	12.1648	11.3312	24.4552	11.4456
Emp1	-0.492514	0.252226	0.999875	17.1412	25.6521	13.5646	15.5868	13.1786	5.66562	24.4552	11.4456
Mpped1	-0.49199	0.00777491	0.931647	346.038	245.959	393.842	374.083	302.6	218.126	248.627	190.76
Col23a1	-0.49193	0.119337	0.999875	50.3522	75.9505	48.6456	51.5041	45.6181	19.8297	20.3793	59.1356
Has3	-0.491346	0.0841525	0.999875	49.2809	49.2924	60.807	46.7603	28.8915	19.8297	69.2896	41.0134
Npl	-0.491183	0.0566682	0.999875	52.4949	54.8252	50.0489	45.405	31.9327	25.4953	36.6827	46.7362
Dgkg	-0.490757	0.0259652	0.999875	288.186	287.706	477.569	321.901	317.806	144.473	216.021	278.509
Irgm1	-0.490232	0.0529735	0.999875	93.2052	129.267	78.5814	60.3141	64.3722	70.8202	73.3655	55.3204
Nxph3	-0.490156	0.131573	0.999875	36.425	31.6879	65.4845	63.7025	43.0838	19.8297	44.8345	31.4754
Tgm4	-0.487613	0.407576	0.999875	9.64192	7.04177	6.54845	13.5537	7.09615	2.83281	4.07586	8.58419
Sdcbp2	-0.487473	0.257675	0.999875	14.9985	21.6283	23.8551	12.876	12.1648	14.164	4.07586	18.1222
Riox1	-0.487076	0.0905152	0.999875	52.4949	34.2029	36.952	47.438	34.467	33.9937	20.3793	26.7064
Mc4r	-0.4867	0.224294	0.999875	31.0684	35.2088	16.8389	21.686	22.3022	16.9968	4.07586	21.9374
Yjefn3	-0.486468	0.0638331	0.999875	68.5647	60.358	95.4203	53.5372	48.1524	31.1609	73.3655	51.5052
Crip3	-0.485828	0.225913	0.999875	26.7831	22.6342	32.7422	16.2645	24.3297	5.66562	20.3793	15.2608
Fgf10	-0.484832	0.142572	0.999875	40.7103	42.7536	41.1617	28.4628	35.9876	16.9968	12.2276	30.5216
Atf3	-0.484265	0.363053	0.999875	14.9985	19.1134	19.1776	4.7438	11.1511	2.83281	20.3793	9.53799
Psrc1	-0.484261	0.327946	0.999875	8.57059	12.5746	20.5808	18.2975	11.1511	11.3312	0	15.2608
Rab43	-0.483812	0.210473	0.999875	29.9971	16.0955	18.2421	19.6529	14.1923	16.9968	16.3034	13.3532
Nbl1	-0.48348	0.0856638	0.999875	98.5618	183.086	93.5493	105.719	120.635	65.1546	44.8345	93.4723
Cyp2a5	-0.483391	0.313699	0.999875	18.2125	6.53878	22.9196	23.719	10.6442	11.3312	20.3793	12.3994
Gm20544	-0.483106	0.367996	0.999875	18.2125	7.54475	10.2904	10.1653	7.60302	5.66562	4.07586	11.4456
Gm9989	-0.48296	0.0782978	0.999875	43.9243	40.2387	60.807	49.4711	35.9876	19.8297	52.9862	34.3368
NA	-0.482924	0.00203656	0.691955	2571.18	2270.47	2033.76	1829.07	1991.48	1215.27	1320.58	1657.7
Myo1f	-0.481915	0.0997941	0.999875	51.4236	55.8311	37.8875	33.8843	26.3571	45.3249	24.4552	34.3368
Lpin3	-0.481785	0.389186	0.999875	5.35662	15.5925	10.2904	9.48761	9.12362	11.3312	4.07586	4.769
Gm42902	-0.481552	0.215578	0.999875	32.1397	22.1313	39.2907	20.3306	22.3022	2.83281	32.6069	22.8912
Galnt2	-0.480894	0.281981	0.999875	12.8559	15.0895	12.6292	14.9091	11.658	8.49842	12.2276	7.6304
Col11a1	-0.479763	0.0125602	0.999875	173.554	181.577	211.889	130.116	121.141	167.136	110.048	109.687
Mlip	-0.479459	0.0435236	0.999875	98.5618	59.352	79.5169	73.8678	60.8241	36.8265	52.9862	61.0432
Gpat2	-0.479429	0.379929	0.999875	27.8544	10.5626	6.54845	12.876	7.60302	5.66562	12.2276	14.307
5730522E02Rik	-0.479266	0.151561	0.999875	26.7831	36.7178	23.3873	24.3967	19.261	19.8297	20.3793	20.9836
Gm20163	-0.479113	0.379106	0.999875	12.8559	7.04177	9.82267	12.876	10.1374	2.83281	12.2276	4.769
NA	-0.47884	0.0103361	0.966261	638.509	550.264	401.794	411.355	469.866	283.281	313.841	342.414
Prdm8	-0.476968	0.416683	0.999875	23.5691	11.5686	3.74197	14.2314	8.61675	2.83281	12.2276	12.3994
Emp3	-0.476534	0.342872	0.999875	11.7846	18.6104	14.0324	7.45455	8.10988	5.66562	20.3793	8.58419
Ramp2	-0.474725	0.219839	0.999875	46.0669	31.185	18.2421	19.6529	23.3159	22.6625	12.2276	19.076
Gbp7	-0.473504	0.0592646	0.999875	59.9941	70.4177	51.9199	44.0496	38.5219	45.3249	40.7586	41.0134
Slamf9	-0.47325	0.290768	0.999875	16.0699	24.6462	16.8389	11.5207	12.6717	2.83281	16.3034	16.2146
Gm2420	-0.473236	0.403089	0.999875	8.57059	10.0597	17.7744	5.42149	8.61675	8.49842	4.07586	7.6304
Lypd6b	-0.472535	0.0436692	0.999875	68.5647	72.4296	56.1296	85.3884	49.673	67.9874	48.9103	42.921
Best1	-0.472329	0.361164	0.999875	6.42794	12.0716	18.2421	17.6198	14.1923	8.49842	12.2276	4.769
Mei1	-0.471899	0.244979	0.999875	19.2838	24.6462	53.3231	24.3967	21.2884	11.3312	20.3793	31.4754
Gm37264	-0.471755	0.367578	0.999875	10.7132	9.0537	11.6937	8.13223	6.58928	5.66562	12.2276	6.6766
2810459M11Rik	-0.471322	0.0491626	0.999875	95.3478	100.597	77.1782	69.8017	79.0714	48.1577	40.7586	61.0432
Muc15	-0.470655	0.417618	0.999875	4.2853	7.04177	12.6292	12.1983	6.08241	5.66562	12.2276	5.7228
Arhgap36	-0.469971	0.509542	0.999875	44.9956	94.5609	13.0969	77.9339	57.2761	65.1546	12.2276	29.5678
N4bp2os	-0.469429	0.293697	0.999875	23.5691	18.6104	18.7099	11.5207	17.7404	5.66562	8.15172	13.3532
Gm44524	-0.468988	0.304775	0.999875	22.4978	15.5925	17.3066	8.13223	10.6442	8.49842	12.2276	13.3532
Adamts18	-0.468681	0.31242	0.999875	12.8559	17.6044	16.8389	20.3306	9.63049	16.9968	28.531	5.7228
A2m	-0.46867	0.488833	0.999875	125.345	375.729	64.549	103.686	234.68	79.3186	73.3655	91.5647
Rcn3	-0.468598	0.209421	0.999875	21.4265	20.1193	19.1776	23.0413	17.7404	16.9968	8.15172	13.3532
Gm26673	-0.46825	0.391426	0.999875	8.57059	9.55668	13.0969	9.48761	9.63049	0	12.2276	6.6766
Sik2	-0.467033	0.00919163	0.946975	217.479	192.14	283.454	233.124	135.841	201.129	203.793	156.423
Cyb561a3	-0.466851	0.0756027	0.999875	38.5677	51.3043	58.4683	70.4794	39.0288	39.6593	52.9862	35.2906
Gm8281	-0.466608	0.403479	0.999875	10.7132	11.5686	11.2259	6.09917	7.09615	8.49842	0	9.53799
Clec2d	-0.465377	0.311121	0.999875	14.9985	18.6104	12.6292	11.5207	9.12362	11.3312	4.07586	14.307
Gpr150	-0.464624	0.342039	0.999875	10.7132	10.0597	14.0324	12.1983	7.60302	5.66562	8.15172	11.4456
NA	-0.464363	0.0613482	0.999875	110.346	105.124	70.162	104.364	94.2774	67.9874	36.6827	63.9046
Slc6a13	-0.463852	0.225695	0.999875	32.1397	32.1909	19.6453	16.9422	18.7541	28.3281	16.3034	12.3994
Gm38372	-0.463661	0.221749	0.999875	27.8544	27.6641	15.4356	21.686	19.7678	16.9968	12.2276	14.307
Gimap8	-0.463532	0.268893	0.999875	20.3552	18.6104	16.3711	11.5207	11.1511	8.49842	16.3034	13.3532
D830036C21Rik	-0.463334	0.312489	0.999875	19.2838	13.0776	24.3228	10.843	8.61675	16.9968	20.3793	10.4918
Phospho1	-0.462517	0.353547	0.999875	20.3552	10.0597	9.82267	10.1653	9.63049	8.49842	12.2276	6.6766
Tspan4	-0.461898	0.0887828	0.999875	115.703	115.183	55.1941	87.4215	74.0027	39.6593	65.2137	81.0729
S100a3	-0.460862	0.421339	0.999875	6.42794	11.0656	7.48394	11.5207	6.58928	8.49842	0	8.58419
Dnah17	-0.459863	0.261677	0.999875	23.5691	22.6342	25.7261	14.2314	15.7129	5.66562	12.2276	22.8912
Ccdc96	-0.458961	0.246392	0.999875	18.2125	16.5984	20.5808	33.2066	17.2335	11.3312	12.2276	19.076
Cd180	-0.457626	0.142609	0.999875	29.9971	31.6879	28.5325	25.7521	19.261	19.8297	24.4552	22.8912
Kcnv1	-0.457384	0.0179027	0.999875	404.96	286.7	588.893	523.174	306.148	308.776	338.296	361.49
Pgam2	-0.457268	0.227359	0.999875	33.211	20.1193	28.5325	40.6612	28.8915	19.8297	32.6069	10.4918
Gm38575	-0.457105	0.212204	0.999875	27.8544	17.6044	45.8391	37.2727	22.809	16.9968	36.6827	21.9374
Rnf39	-0.456867	0.330536	0.999875	8.57059	11.5686	16.8389	19.6529	11.658	8.49842	16.3034	7.6304
Mir1188	-0.456664	0.247488	0.999875	23.5691	19.6163	21.0486	12.876	12.6717	14.164	12.2276	16.2146
Tlr1	-0.456099	0.349765	0.999875	9.64192	11.5686	15.9034	12.1983	10.6442	11.3312	12.2276	4.769
Arc	-0.455192	0.188655	0.999875	596.727	320.903	840.073	534.017	405.494	263.451	505.407	496.929
4930452B06Rik	-0.454871	0.079697	0.999875	63.2081	77.4594	50.0489	46.7603	43.5906	56.6562	32.6069	40.0596
Frzb	-0.454829	0.219973	0.999875	23.5691	24.1432	17.7744	21.0083	17.2335	22.6625	12.2276	11.4456
Aldh1l2	-0.45473	0.17396	0.999875	39.639	57.3401	51.4521	32.5289	47.6456	19.8297	16.3034	34.3368
H2-D1	-0.453976	0.0619851	0.999875	318.183	449.667	196.453	185.686	200.72	249.287	207.869	186.945
Piezo2	-0.453744	0.376136	0.999875	11.7846	27.1611	9.35493	12.1983	9.63049	11.3312	4.07586	16.2146
Aloxe3	-0.453663	0.0926666	0.999875	46.0669	37.2208	42.0972	39.9835	29.9052	31.1609	20.3793	33.383
Gm45838	-0.453295	0.29523	0.999875	9.64192	23.1372	34.6132	16.9422	17.7404	14.164	16.3034	14.307
Mdga1	-0.452549	0.0442279	0.999875	175.697	219.301	113.195	142.992	113.538	152.972	130.427	91.5647
4930473A02Rik	-0.452399	0.262198	0.999875	22.4978	22.1313	15.9034	13.5537	13.6854	16.9968	8.15172	13.3532
Trpc4	-0.452391	0.282999	0.999875	83.5633	188.116	260.535	146.38	181.459	76.4858	105.972	125.902
Sox21	-0.452294	0.0763962	0.999875	71.7787	66.8968	44.4359	63.0248	43.0838	56.6562	24.4552	48.6438
Fes	-0.451879	0.208224	0.999875	21.4265	34.7058	33.6777	18.9752	20.2747	19.8297	12.2276	23.845
Tmem51	-0.451628	0.181454	0.999875	26.7831	28.67	21.5163	25.7521	20.2747	14.164	16.3034	20.0298
Gm14323	-0.451318	0.36463	0.999875	14.9985	15.0895	12.6292	13.5537	12.6717	5.66562	0	14.307
Cd300c2	-0.450749	0.192709	0.999875	28.9257	55.3282	42.5649	24.3967	27.8777	19.8297	48.9103	22.8912
Rexo5	-0.449996	0.259629	0.999875	18.2125	20.6223	19.6453	13.5537	12.6717	8.49842	16.3034	15.2608
H2-K1	-0.449433	0.0383313	0.999875	266.76	322.412	186.631	159.934	193.117	186.965	130.427	164.053
Cdh4	-0.449239	0.014251	0.999875	166.055	167.493	144.066	134.86	102.894	147.306	130.427	89.6571
Tnfrsf1a	-0.448724	0.143923	0.999875	54.6375	82.9922	39.2907	45.405	49.673	50.9905	28.531	30.5216
Clec5a	-0.448506	0.146715	0.999875	34.2824	33.1969	35.5487	29.8182	30.9189	16.9968	24.4552	20.0298
Postn	-0.44841	0.11164	0.999875	58.9228	73.9385	45.8391	63.7025	53.728	48.1577	12.2276	47.69
Baz1a	-0.447629	0.0939715	0.999875	79.278	62.3699	86.5331	42.0165	42.07	50.9905	52.9862	55.3204
Pcdha11	-0.446989	0.312194	0.999875	26.7831	13.0776	18.7099	14.9091	13.1786	11.3312	28.531	7.6304
Cenpf	-0.446324	0.407241	0.999875	7.49927	17.1014	14.5001	14.2314	14.6992	5.66562	0	11.4456
Islr2	-0.445973	0.0609537	0.999875	108.204	134.8	200.663	195.174	149.526	82.1514	142.655	94.4261
Creb3l1	-0.444697	0.482384	0.999875	5.35662	9.55668	8.41944	17.6198	13.1786	5.66562	0	5.7228
Dnajb5	-0.444685	0.00399195	0.796842	748.855	608.61	937.364	580.777	523.594	487.243	521.71	574.187
5930403N24Rik	-0.444684	0.388058	0.999875	16.0699	11.5686	8.41944	11.5207	10.1374	11.3312	0	8.58419
Plin2	-0.444256	0.116301	0.999875	83.5633	76.9564	59.8715	61.6694	77.5508	45.3249	28.531	39.1058
Gm15337	-0.443899	0.282764	0.999875	16.0699	13.5805	19.6453	18.2975	13.6854	16.9968	12.2276	8.58419
Slc14a2	-0.443337	0.466873	0.999875	7.49927	6.53878	12.1614	14.2314	10.6442	0	4.07586	9.53799
Mki67	-0.442496	0.183826	0.999875	25.7118	33.6999	42.0972	29.8182	26.3571	22.6625	8.15172	30.5216
Egr4	-0.442107	0.141918	0.999875	111.418	60.861	179.147	83.3554	74.0027	53.8233	110.048	86.7957
4930447F24Rik	-0.441814	0.40681	0.999875	12.8559	12.5746	21.5163	5.42149	10.1374	5.66562	8.15172	12.3994
Got1l1	-0.441743	0.425573	0.999875	6.42794	20.1193	16.3711	18.2975	19.261	0	8.15172	11.4456
NA	-0.441548	0.00834276	0.931647	235.691	226.342	215.631	165.355	177.404	130.309	142.655	153.562
F8a	-0.441396	0.0850035	0.999875	79.278	56.3341	52.3876	49.4711	49.1662	50.9905	36.6827	34.3368
Eif2ak2	-0.44109	0.145441	0.999875	130.702	126.752	68.291	64.3802	64.3722	118.978	32.6069	68.6736
Htr4	-0.440899	0.106058	0.999875	63.2081	62.3699	45.3714	36.595	39.5357	45.3249	28.531	36.2444
Ltbp4	-0.440536	0.00675568	0.931647	164.984	181.577	167.921	165.355	133.813	130.309	77.4413	136.393
Igsf21	-0.440186	0.0433541	0.999875	115.703	79.4714	140.324	139.603	92.7568	93.4827	89.6689	76.304
Asb4	-0.440075	0.33143	0.999875	23.5691	38.2267	19.1776	50.8265	43.5906	11.3312	8.15172	21.9374
Sfrp1	-0.439065	0.0712456	0.999875	78.2067	127.255	153.421	121.983	118.1	59.489	77.4413	86.7957
Sgcd	-0.438943	0.373719	0.999875	18.2125	16.5984	12.1614	8.80992	10.6442	11.3312	0	13.3532
Gm15624	-0.43888	0.216018	0.999875	22.4978	18.1074	30.8713	28.4628	19.7678	16.9968	24.4552	15.2608
Far1os	-0.43872	0.196564	0.999875	36.425	32.1909	38.3552	31.1736	19.261	14.164	20.3793	41.9672
Anxa3	-0.438507	0.0542891	0.999875	116.774	151.901	82.3234	90.1322	83.6332	90.6498	69.2896	79.1653
Vip	-0.438346	0.15863	0.999875	54.6375	31.6879	40.2262	42.6942	27.8777	31.1609	12.2276	42.921
Mpp3	-0.438341	0.0185199	0.999875	271.045	213.768	296.551	185.008	157.129	144.473	203.793	209.836
Sstr1	-0.438161	0.132663	0.999875	62.1368	55.3282	38.823	68.4463	55.7554	28.3281	44.8345	30.5216
AU020206	-0.437287	0.194802	0.999875	59.9941	87.5191	52.3876	26.4298	31.4258	39.6593	52.9862	48.6438
Tigd2	-0.437173	0.0340378	0.999875	110.346	134.8	97.2913	137.57	104.922	65.1546	73.3655	93.4723
Doc2g	-0.436826	0.27229	0.999875	22.4978	24.6462	22.4518	21.0083	19.261	5.66562	8.15172	23.845
Gm14033	-0.436143	0.444038	0.999875	11.7846	7.54475	9.82267	9.48761	5.57554	2.83281	4.07586	12.3994
Psmb8	-0.435584	0.239715	0.999875	28.9257	46.2745	32.7422	20.3306	33.4533	22.6625	20.3793	15.2608
Rprml	-0.43543	0.0752636	0.999875	111.418	61.364	85.1298	69.8017	64.8791	62.3218	73.3655	45.7824
Adrb2	-0.435175	0.446665	0.999875	14.9985	12.0716	4.67746	11.5207	5.06868	14.164	12.2276	5.7228
Sh3rf1	-0.434739	0.0273588	0.999875	145.7	136.811	102.436	134.182	116.58	87.817	77.4413	85.8419
2810407A14Rik	-0.433884	0.443149	0.999875	9.64192	6.0358	9.35493	11.5207	6.08241	2.83281	16.3034	5.7228
Tnfrsf25	-0.433786	0.209744	0.999875	31.0684	39.2327	61.7425	29.8182	27.3709	14.164	32.6069	42.921
Lcp2	-0.433269	0.238948	0.999875	22.4978	24.6462	22.4518	29.1405	24.8365	16.9968	8.15172	15.2608
Gpr3	-0.432375	0.184763	0.999875	51.4236	32.6939	37.8875	24.3967	23.3159	31.1609	40.7586	21.9374
Gbx1	-0.431785	0.299378	0.999875	48.2096	48.7894	24.3228	21.0083	17.7404	53.8233	28.531	15.2608
Hcrtr1	-0.430098	0.428577	0.999875	12.8559	11.0656	10.2904	8.13223	8.10988	0	8.15172	11.4456
2310075C17Rik	-0.429742	0.45102	0.999875	12.8559	5.02983	9.82267	11.5207	6.08241	5.66562	4.07586	10.4918
Pde1a	-0.429396	0.00514549	0.886436	960.978	909.897	1144.11	1261.85	938.719	849.842	562.469	792.607
Pxdc1	-0.429355	0.230367	0.999875	26.7831	23.1372	21.9841	25.0744	22.3022	11.3312	12.2276	18.1222
Col5a1	-0.429209	0.173027	0.999875	58.9228	43.2566	43.0327	60.9917	40.5494	11.3312	32.6069	55.3204
Adm	-0.429193	0.439847	0.999875	11.7846	18.1074	6.0807	8.80992	5.57554	5.66562	12.2276	11.4456
Epsti1	-0.42904	0.344215	0.999875	17.1412	17.1014	10.2904	18.2975	7.09615	11.3312	16.3034	15.2608
Coa4	-0.428602	0.244863	0.999875	23.5691	22.6342	20.1131	21.686	19.7678	14.164	8.15172	16.2146
Apobec3	-0.428596	0.161173	0.999875	27.8544	56.3341	47.2424	33.8843	33.9601	22.6625	36.6827	30.5216
Sv2b	-0.428129	0.0246946	0.999875	1704.48	960.698	1989.79	2059.49	1379.69	1070.8	1210.53	1317.2
Gm30934	-0.427634	0.399992	0.999875	10.7132	9.55668	11.6937	11.5207	9.12362	5.66562	4.07586	9.53799
3110035E14Rik	-0.427008	0.365331	0.999875	646.008	270.605	904.154	1276.08	761.315	439.085	501.331	597.078
Syt17	-0.426812	0.0819411	0.999875	112.489	97.5788	57.0651	94.8761	77.0439	70.8202	48.9103	61.997
Etv5	-0.426447	0.0014504	0.575717	346.038	341.526	442.02	387.636	293.983	311.609	260.855	263.249
NA	-0.426394	0.0200189	0.999875	432.815	360.136	295.148	298.86	339.095	198.297	228.248	239.404
Socs3	-0.425467	0.383613	0.999875	17.1412	20.1193	13.5646	8.13223	14.6992	14.164	4.07586	7.6304
Ly6a	-0.42541	0.154098	0.999875	77.1353	83.9982	53.7908	33.8843	44.6044	39.6593	40.7586	55.3204
Gm43339	-0.424851	0.40186	0.999875	13.9272	8.04773	10.2904	12.1983	8.10988	8.49842	4.07586	9.53799
Neil2	-0.424788	0.280259	0.999875	14.9985	22.6342	14.9679	23.0413	14.6992	14.164	12.2276	14.307
Gm16253	-0.42391	0.457294	0.999875	9.64192	12.5746	8.41944	5.42149	6.58928	5.66562	4.07586	8.58419
1700029I15Rik	-0.423853	0.161245	0.999875	35.3537	34.2029	49.5811	37.9504	29.3983	19.8297	20.3793	39.1058
Pcdhgb1	-0.423211	0.21916	0.999875	24.6405	25.6521	21.0486	27.7851	16.7266	14.164	32.6069	17.1684
Ddx59	-0.423046	0.0584592	0.999875	62.1368	68.4057	85.5976	86.0661	60.8241	53.8233	73.3655	45.7824
Ddx60	-0.42283	0.407207	0.999875	23.5691	20.6223	7.95169	8.80992	7.60302	16.9968	12.2276	11.4456
Gm43172	-0.422714	0.301134	0.999875	21.4265	15.5925	21.9841	12.1983	13.6854	11.3312	16.3034	12.3994
Tdo2	-0.422227	0.450355	0.999875	11.7846	12.5746	5.61296	14.9091	12.1648	2.83281	8.15172	6.6766
Rasgef1c	-0.421953	0.0391084	0.999875	84.6346	72.9326	91.2106	100.975	70.9615	53.8233	69.2896	62.9508
NA	-0.421119	0.193434	0.999875	33.211	41.2446	30.4035	30.4959	33.9601	19.8297	16.3034	21.9374
Dhcr24	-0.421006	0.00670555	0.931647	351.394	317.885	253.986	363.24	249.886	283.281	220.096	207.928
Cpne4	-0.4205	0.00195125	0.691955	355.68	272.617	347.536	320.546	236.2	223.792	240.476	260.387
Rnf213	-0.420344	0.0666255	0.999875	201.409	167.996	121.146	98.9422	105.428	113.312	81.5172	128.763
Pik3r5	-0.420323	0.293794	0.999875	21.4265	21.1253	40.6939	27.7851	27.3709	22.6625	28.531	8.58419
Cadps2	-0.420143	0.0402514	0.999875	371.749	399.872	372.794	514.364	429.824	331.439	171.186	277.556
Ptar1	-0.419934	0.131755	0.999875	43.9243	50.2983	46.3069	48.1157	46.125	19.8297	28.531	34.3368
Gm44698	-0.419696	0.393011	0.999875	19.2838	8.55072	22.4518	12.1983	7.60302	8.49842	24.4552	12.3994
Jph2	-0.4187	0.487838	0.999875	13.9272	7.54475	5.61296	11.5207	9.63049	5.66562	0	7.6304
4933427I04Rik	-0.418422	0.452806	0.999875	19.2838	6.53878	9.35493	8.13223	8.61675	2.83281	12.2276	7.6304
Pdia5	-0.418317	0.204634	0.999875	31.0684	40.7416	52.8553	25.7521	23.3159	22.6625	28.531	38.152
Slc37a1	-0.417908	0.0700296	0.999875	49.2809	62.3699	57.5328	57.6033	45.6181	42.4921	40.7586	40.0596
Rbm20	-0.417546	0.2243	0.999875	39.639	39.7357	29.0003	31.1736	33.9601	16.9968	8.15172	30.5216
3110040N11Rik	-0.416331	0.0633148	0.999875	106.061	87.5191	85.5976	73.8678	79.0714	39.6593	61.1379	68.6736
Il17rc	-0.415476	0.166252	0.999875	29.9971	34.2029	29.0003	31.8512	25.8503	19.8297	24.4552	21.9374
Gen1	-0.41508	0.431754	0.999875	12.8559	9.0537	10.7582	8.80992	6.58928	2.83281	8.15172	11.4456
Gm16759	-0.413803	0.442895	0.999875	24.6405	12.5746	6.0807	8.80992	8.10988	11.3312	12.2276	8.58419
Siah1b	-0.41366	0.199383	0.999875	27.8544	26.6581	31.8068	31.8512	27.3709	16.9968	16.3034	20.9836
Ggt1	-0.413012	0.373105	0.999875	18.2125	13.5805	13.5646	16.2645	11.1511	5.66562	4.07586	18.1222
Gm14286	-0.412426	0.196907	0.999875	36.425	31.6879	68.7587	47.438	29.9052	25.4953	36.6827	45.7824
Gpx3	-0.412231	0.418624	0.999875	122.131	197.169	62.2103	154.512	180.445	84.9842	48.9103	80.1191
Arhgap15	-0.411529	0.242017	0.999875	38.5677	25.1492	44.4359	58.9587	38.5219	22.6625	12.2276	39.1058
Fchsd1	-0.41138	0.080751	0.999875	54.6375	51.8073	49.5811	58.9587	38.5219	45.3249	32.6069	42.921
Fgfrl1	-0.410367	0.0453334	0.999875	95.3478	85.5072	78.5814	73.8678	61.8379	70.8202	40.7586	67.7198
Gm16386	-0.410301	0.387984	0.999875	13.9272	12.0716	13.5646	8.80992	9.12362	5.66562	12.2276	9.53799
Hes5	-0.41009	0.16023	0.999875	85.7059	76.4535	36.0165	78.6116	40.0425	59.489	65.2137	51.5052
Vgf	-0.409649	0.0100581	0.966261	756.355	750.954	626.78	565.868	529.17	538.233	623.606	367.213
Capn3	-0.409269	0.0682326	0.999875	68.5647	75.4475	65.4845	53.5372	49.1662	53.8233	40.7586	51.5052
Phlda1	-0.408321	0.0260997	0.999875	138.201	117.698	109.92	108.43	84.6469	107.647	101.896	76.304
Gm32200	-0.408245	0.526203	0.999875	16.0699	2.51492	8.88718	10.843	9.63049	2.83281	8.15172	5.7228
Gm22771	-0.408215	0.294398	0.999875	17.1412	15.5925	22.4518	33.8843	15.7129	14.164	20.3793	18.1222
NA	-0.407835	0.15499	0.999875	73.9214	54.3222	46.7746	43.3719	50.6868	28.3281	24.4552	44.8286
Gbp9	-0.407394	0.325061	0.999875	27.8544	37.2208	26.6615	12.1983	12.6717	22.6625	16.3034	27.6602
Dera	-0.407142	0.363739	0.999875	23.5691	23.1372	14.5001	12.876	18.7541	5.66562	8.15172	15.2608
Slc1a5	-0.406774	0.308539	0.999875	36.425	78.9684	29.9358	18.9752	33.4533	22.6625	36.6827	31.4754
Krt77	-0.406513	0.0958079	0.999875	58.9228	61.8669	53.3231	69.124	48.1524	67.9874	36.6827	34.3368
B3gnt5	-0.406275	0.530596	0.999875	5.35662	13.5805	7.48394	8.13223	10.1374	2.83281	0	7.6304
Camk1g	-0.405757	0.0261428	0.999875	163.913	195.158	161.373	151.124	154.595	99.1483	97.8206	130.671
Bhlhe22	-0.405385	0.204024	0.999875	27.8544	34.2029	29.0003	37.2727	24.3297	25.4953	8.15172	30.5216
Rnf17	-0.404576	0.290562	0.999875	18.2125	21.1253	24.3228	16.9422	13.1786	25.4953	16.3034	12.3994
Osbpl10	-0.404506	0.0367999	0.999875	122.131	102.106	89.8073	94.8761	70.4546	67.9874	77.4413	88.7033
Ncald	-0.404003	0.0137157	0.999875	1720.55	1669.4	2073.99	2317.69	1875.41	1356.91	1039.34	1567.09
Xdh	-0.403153	0.356355	0.999875	34.2824	30.682	14.5001	14.9091	18.7541	8.49842	36.6827	12.3994
Renbp	-0.402791	0.273126	0.999875	34.2824	28.1671	21.0486	32.5289	29.9052	28.3281	12.2276	12.3994
Junb	-0.401557	0.283266	0.999875	322.469	169.002	396.649	237.868	217.446	116.145	211.945	300.447
Wnt7a	-0.401147	0.0981579	0.999875	77.1353	63.8789	71.5652	93.5207	56.2623	87.817	57.062	41.0134
Gm2164	-0.400958	0.465467	0.999875	4.2853	14.0835	32.7422	16.2645	13.6854	2.83281	20.3793	15.2608
Trpc7	-0.400349	0.179431	0.999875	56.7802	59.855	70.6297	61.6694	65.8928	28.3281	16.3034	56.2742
Znf41-ps	-0.398701	0.346157	0.999875	23.5691	15.0895	16.3711	31.1736	13.6854	22.6625	28.531	9.53799
AC153912.1	-0.39858	0.259169	0.999875	18.2125	24.6462	31.8068	45.405	22.3022	16.9968	28.531	24.7988
Coro1a	-0.398505	0.00696455	0.931647	339.61	315.874	329.293	271.752	261.544	206.795	183.414	268.018
Vasn	-0.398028	0.056661	0.999875	76.064	78.9684	89.3396	65.0579	58.7967	50.9905	69.2896	59.1356
NA	-0.396893	0.00828736	0.931647	431.744	345.55	299.358	354.43	313.244	257.786	232.324	258.48
Gm2464	-0.396775	0.547349	0.999875	6.42794	8.04773	8.41944	10.843	11.658	8.49842	0	1.9076
Spire2	-0.396647	0.0424495	0.999875	99.6331	97.5788	75.3072	93.5207	71.4683	67.9874	65.2137	68.6736
Impg2	-0.396235	0.440561	0.999875	22.4978	16.0955	14.9679	7.45455	13.6854	0	12.2276	15.2608
Brd3os	-0.395739	0.0293134	0.999875	118.917	92.0459	113.195	106.397	77.0439	84.9842	89.6689	81.0729
Zfp747	-0.395698	0.175824	0.999875	28.9257	31.185	33.6777	35.2397	25.3434	22.6625	24.4552	24.7988
Gm14411	-0.395693	0.398887	0.999875	17.1412	13.5805	10.2904	21.686	14.6992	8.49842	4.07586	13.3532
Gm28800	-0.394848	0.374397	0.999875	11.7846	18.1074	19.1776	12.876	15.206	14.164	12.2276	6.6766
Plp2	-0.394603	0.379395	0.999875	18.2125	13.0776	19.6453	21.686	20.2747	8.49842	4.07586	13.3532
Rasgrf2	-0.394446	0.0122223	0.999875	845.275	803.264	575.796	693.951	610.776	674.208	480.951	450.193
Lzts1	-0.394443	0.0166999	0.999875	506.736	377.74	571.118	505.554	377.616	317.274	501.331	317.615
Zbtb45	-0.394427	0.0565008	0.999875	87.8486	67.9027	69.6942	79.2893	57.2761	53.8233	65.2137	56.2742
Wscd2	-0.3942	0.028227	0.999875	245.333	211.253	293.745	272.43	183.486	186.965	285.31	153.562
Gm45251	-0.394039	0.451598	0.999875	8.57059	13.0776	11.2259	8.80992	7.60302	5.66562	4.07586	11.4456
Tec	-0.39361	0.366659	0.999875	14.9985	29.676	28.5325	19.6529	24.3297	14.164	0	21.9374
Ninj1	-0.393484	0.0784393	0.999875	117.846	108.644	82.3234	75.2232	84.14	82.1514	65.2137	57.228
1500035N22Rik	-0.39341	0.51877	0.999875	5.35662	10.5626	11.6937	10.843	7.60302	2.83281	0	13.3532
Mgp	-0.393398	0.391426	0.999875	14.9985	40.7416	12.1614	26.4298	13.1786	16.9968	12.2276	27.6602
Mt3	-0.393385	0.0595556	0.999875	1920.88	2304.67	1885.02	1047.03	1778.09	1059.47	1116.79	1469.8
Gm37608	-0.39298	0.288734	0.999875	23.5691	25.1492	45.8391	29.1405	17.7404	11.3312	32.6069	34.3368
Gm4724	-0.392898	0.499754	0.999875	16.0699	10.5626	7.48394	5.42149	8.61675	11.3312	0	6.6766
F13a1	-0.392802	0.543529	0.999875	4.2853	15.5925	5.61296	8.13223	9.12362	2.83281	4.07586	6.6766
Tnk2os	-0.392557	0.472927	0.999875	6.42794	13.0776	11.2259	10.1653	6.58928	0	16.3034	10.4918
Ccdc80	-0.392211	0.1447	0.999875	36.425	47.7834	45.3714	51.5041	40.0425	28.3281	24.4552	36.2444
Gm29609	-0.391905	0.462478	0.999875	7.49927	9.55668	14.9679	8.13223	8.10988	8.49842	4.07586	8.58419
Acsm5	-0.391516	0.509901	0.999875	7.49927	9.0537	19.1776	6.09917	8.61675	0	12.2276	10.4918
Fam19a2	-0.391483	0.0935717	0.999875	306.399	236.905	151.082	170.777	165.746	152.972	105.972	213.651
Adgra2	-0.390802	0.107894	0.999875	72.85	68.4057	82.3234	48.1157	50.1799	42.4921	48.9103	61.0432
Cxcr4	-0.390766	0.392168	0.999875	10.7132	17.1014	14.0324	16.9422	15.206	11.3312	4.07586	9.53799
Mrps26	-0.390447	0.0120094	0.993669	221.764	210.247	176.808	182.298	168.28	152.972	130.427	138.301
Esyt1	-0.390426	0.238778	0.999875	59.9941	49.7953	34.1455	24.3967	34.467	39.6593	16.3034	31.4754
NA	-0.390382	0.187969	0.999875	47.1383	51.8073	44.9037	35.9174	45.1112	14.164	36.6827	32.4292
B3gnt2	-0.390272	0.130348	0.999875	62.1368	50.8013	92.6138	87.4215	50.1799	48.1577	52.9862	69.6274
Slco5a1	-0.389955	0.129513	0.999875	82.4919	99.0877	142.663	60.3141	68.934	84.9842	69.2896	74.3964
Bean1	-0.389927	0.219959	0.999875	51.4236	53.3162	29.468	31.1736	35.4807	39.6593	16.3034	28.614
Stxbp5l	-0.389465	0.00586458	0.893581	365.321	344.544	413.488	382.893	322.368	226.625	248.627	319.523
NA	-0.389235	0.0056131	0.893581	13821.2	12347.7	10445.2	9152.15	10469.9	7679.74	7923.47	8836
NA	-0.389135	0.00570557	0.893581	12033.1	10752.8	9395.62	8152.56	9548.37	6835.57	6965.64	7413.88
Gbp4	-0.388715	0.550821	0.999875	3.21397	29.173	10.2904	4.7438	6.58928	11.3312	12.2276	9.53799
Bvht	-0.388231	0.493162	0.999875	7.49927	13.0776	7.0162	8.80992	4.05494	8.49842	8.15172	9.53799
Fgd2	-0.388193	0.119372	0.999875	52.4949	52.8132	47.7101	41.3389	35.4807	36.8265	48.9103	34.3368
Arpc1b	-0.387867	0.0660311	0.999875	149.985	163.47	120.211	92.1653	95.798	79.3186	118.2	109.687
Kcnf1	-0.387586	0.00250421	0.702494	395.319	339.011	413.488	355.108	311.217	297.445	277.158	258.48
Gm9954	-0.387517	0.354336	0.999875	14.9985	27.1611	20.1131	13.5537	15.206	22.6625	4.07586	14.307
Nectin1	-0.387053	0.0435881	0.999875	94.2765	94.5609	77.1782	89.4546	69.4409	70.8202	65.2137	64.8584
Gm17705	-0.386303	0.421778	0.999875	12.8559	16.5984	13.5646	10.1653	11.658	2.83281	8.15172	13.3532
Htr3a	-0.386154	0.37041	0.999875	18.2125	16.0955	12.1614	18.9752	9.63049	19.8297	4.07586	15.2608
4932438H23Rik	-0.386131	0.38394	0.999875	14.9985	27.1611	11.6937	21.0083	17.7404	14.164	4.07586	15.2608
Gm7244	-0.385631	0.468056	0.999875	11.7846	7.04177	23.3873	12.1983	13.6854	2.83281	16.3034	8.58419
Ncf2	-0.385557	0.139416	0.999875	51.4236	50.8013	45.3714	37.2727	37.0013	45.3249	28.531	30.5216
Cd300a	-0.38511	0.481973	0.999875	5.35662	15.0895	18.2421	10.1653	14.1923	11.3312	4.07586	5.7228
Kank3	-0.384602	0.118576	0.999875	82.4919	63.3759	90.2751	53.5372	51.1936	39.6593	77.4413	59.1356
Tert	-0.384068	0.450347	0.999875	12.8559	22.1313	10.7582	20.3306	19.7678	8.49842	0	13.3532
Frmd6	-0.383897	0.0311206	0.999875	175.697	177.553	236.212	164.678	121.648	169.968	130.427	162.146
B130055M24Rik	-0.383551	0.127798	0.999875	71.7787	69.4117	104.307	72.5124	70.9615	28.3281	65.2137	69.6274
Ak4	-0.383463	0.0489808	0.999875	254.975	348.064	198.324	248.033	229.611	232.29	134.503	192.667
Ggta1	-0.383415	0.147342	0.999875	59.9941	106.632	78.1137	50.8265	51.1936	67.9874	65.2137	52.459
A930015D03Rik	-0.383359	0.355786	0.999875	19.2838	17.6044	22.4518	12.1983	13.1786	11.3312	8.15172	18.1222
Lama1	-0.383071	0.307967	0.999875	21.4265	28.1671	15.9034	30.4959	19.261	19.8297	8.15172	20.9836
Rbpms2	-0.38259	0.389122	0.999875	18.2125	35.7118	14.9679	16.9422	23.8228	8.49842	12.2276	15.2608
Ly6e	-0.381971	0.0232358	0.999875	381.391	334.987	239.018	315.802	285.367	218.126	248.627	212.697
Hspa1b	-0.381598	0.413829	0.999875	19.2838	18.1074	15.9034	8.80992	14.1923	8.49842	4.07586	14.307
Syt5	-0.381531	0.000365111	0.364404	784.209	797.731	897.605	825.422	703.026	606.221	643.986	578.002
Bmp4	-0.38094	0.607567	0.999875	4.2853	8.55072	5.14521	13.5537	10.6442	0	0	7.6304
Nat8f3	-0.379886	0.240962	0.999875	26.7831	33.6999	21.9841	29.8182	22.3022	16.9968	24.4552	21.9374
Edc3	-0.379781	0.0100701	0.966261	216.407	210.247	217.97	210.76	187.034	130.309	146.731	168.822
Fcrls	-0.379743	0.0343604	0.999875	167.127	224.834	212.825	170.777	183.486	141.64	142.655	122.086
Lingo1	-0.379424	0.00891826	0.938155	387.819	278.653	326.487	388.992	261.037	271.95	293.462	245.126
C3ar1	-0.378294	0.242336	0.999875	37.4963	61.364	47.2424	25.0744	27.8777	39.6593	44.8345	29.5678
Lrrc9	-0.37738	0.11767	0.999875	61.0655	84.5012	101.033	88.0992	82.1126	39.6593	61.1379	63.9046
Nfam1	-0.377193	0.301331	0.999875	22.4978	30.682	20.5808	18.9752	21.7953	16.9968	16.3034	14.307
Tmem74	-0.376718	0.147904	0.999875	56.7802	48.7894	65.4845	42.0165	41.5632	36.8265	28.531	48.6438
Shisa5	-0.376556	0.0384385	0.999875	249.618	194.152	163.711	170.099	155.102	169.968	163.034	118.271
Pla2g5	-0.376018	0.421886	0.999875	16.0699	38.2267	23.3873	38.6281	40.0425	5.66562	8.15172	23.845
Gm20627	-0.375917	0.570003	0.999875	6.42794	6.0358	18.2421	4.7438	10.6442	5.66562	8.15172	2.8614
Kcnd3os	-0.37581	0.455419	0.999875	9.64192	15.0895	14.0324	8.80992	8.61675	14.164	0	11.4456
Cdh22	-0.375682	0.0326437	0.999875	157.485	129.267	128.163	128.083	117.593	96.3155	118.2	85.8419
2024-03-03	-0.375679	0.274883	0.999875	24.6405	26.1551	35.5487	23.0413	26.3571	22.6625	12.2276	18.1222
S100a6	-0.375185	0.159702	0.999875	79.278	85.0042	58.0006	50.8265	63.8653	39.6593	32.6069	58.1818
Ptpru	-0.374334	0.0204272	0.999875	146.771	162.464	172.131	164.678	140.909	93.4827	138.579	119.225
Cks1b	-0.374141	0.513208	0.999875	9.64192	9.55668	6.0807	14.9091	9.63049	2.83281	4.07586	9.53799
Ephb2	-0.374118	0.172663	0.999875	49.2809	53.3162	37.4197	52.8595	46.6318	36.8265	28.531	29.5678
Fam13c	-0.373888	0.00932562	0.954621	244.262	230.869	244.631	222.281	180.952	189.798	228.248	152.608
Gm15893	-0.373859	0.246992	0.999875	29.9971	29.173	29.0003	24.3967	21.2884	33.9937	20.3793	16.2146
Ppp1r3f	-0.373608	0.167159	0.999875	71.7787	59.352	43.9682	47.438	52.7142	33.9937	48.9103	32.4292
Parp16	-0.373403	0.29954	0.999875	24.6405	32.1909	17.7744	23.0413	19.261	14.164	16.3034	21.9374
5530401A14Rik	-0.373281	0.533279	0.999875	5.35662	11.0656	13.0969	10.843	5.06868	2.83281	4.07586	16.2146
Kirrel	-0.373018	0.0710754	0.999875	70.7074	68.9087	75.3072	79.2893	60.3173	62.3218	40.7586	56.2742
Rgs2	-0.372979	0.0196061	0.999875	1354.15	1191.57	1996.34	1328.26	1138.42	1090.63	957.827	1327.69
NA	-0.372903	0.434238	0.999875	14.9985	9.55668	20.5808	11.5207	14.1923	8.49842	8.15172	9.53799
Mettl27	-0.372432	0.314405	0.999875	39.639	31.6879	17.3066	35.2397	28.3846	33.9937	8.15172	19.076
A430027H14Rik	-0.372304	0.38548	0.999875	14.9985	11.5686	22.9196	15.5868	11.658	11.3312	20.3793	11.4456
Chrm1	-0.372238	0.0795072	0.999875	439.243	263.06	387.294	428.975	249.379	246.454	468.724	237.496
Fdxacb1	-0.371495	0.128836	0.999875	48.2096	48.2864	69.6942	63.0248	45.6181	36.8265	44.8345	47.69
Blvrb	-0.370898	0.142668	0.999875	61.0655	56.3341	48.6456	48.1157	50.6868	31.1609	36.6827	37.1982
Hectd2	-0.370497	0.134582	0.999875	152.128	173.026	178.211	124.694	142.43	79.3186	61.1379	174.545
Satb1	-0.370484	0.0181239	0.999875	223.907	187.11	214.696	241.256	192.61	133.142	171.186	159.284
Slc10a4	-0.369868	0.200265	0.999875	83.5633	83.4952	71.0975	63.0248	49.673	70.8202	105.972	30.5216
Gm29514	-0.369696	0.273448	0.999875	26.7831	33.6999	28.5325	25.0744	27.8777	22.6625	8.15172	20.9836
Gm12854	-0.369643	0.426066	0.999875	17.1412	13.5805	9.82267	14.9091	12.6717	5.66562	8.15172	11.4456
Fam81a	-0.369626	0.0144362	0.999875	686.719	633.256	483.182	643.802	578.336	399.426	415.738	467.362
Zfp69	-0.368395	0.438816	0.999875	14.9985	12.0716	15.4356	8.80992	9.63049	2.83281	16.3034	11.4456
Per2	-0.368118	0.0711778	0.999875	364.25	282.174	334.439	330.711	183.993	235.123	199.717	383.427
Tap2	-0.367915	0.217059	0.999875	55.7088	69.4117	29.9358	53.5372	40.0425	50.9905	40.7586	33.383
Shc4	-0.367807	0.106359	0.999875	65.3508	94.0579	63.6135	67.7686	58.2898	67.9874	44.8345	53.4128
Atp1a1	-0.367531	0.00491428	0.885392	2901.15	2286.06	2326.57	3111.93	2220.59	1844.16	2335.47	1841.79
Igf1	-0.367319	0.219618	0.999875	44.9956	65.8908	39.2907	43.3719	30.9189	48.1577	16.3034	49.5976
Ptprb	-0.367274	0.124749	0.999875	83.5633	104.621	67.8232	59.6364	52.2074	65.1546	73.3655	62.9508
Egr2	-0.367196	0.487704	0.999875	61.0655	39.2327	158.566	81.3223	48.6593	36.8265	81.5172	97.2875
Stat1	-0.366994	0.14079	0.999875	227.121	170.511	103.84	103.008	128.238	96.3155	134.503	106.826
Ndst4	-0.36683	0.436796	0.999875	207.837	220.307	119.743	118.595	145.978	223.792	48.9103	95.3799
A330009N23Rik	-0.366696	0.265389	0.999875	42.853	24.6462	57.0651	35.2397	31.4258	22.6625	48.9103	26.7064
Dock2	-0.366624	0.0924751	0.999875	66.4221	65.8908	58.4683	65.0579	51.7005	36.8265	61.1379	48.6438
Evc2	-0.366506	0.119377	0.999875	61.0655	63.3759	58.936	48.1157	46.6318	53.8233	28.531	44.8286
Pcdha7	-0.365789	0.405945	0.999875	13.9272	13.5805	14.0324	20.3306	15.206	14.164	12.2276	6.6766
Moxd1	-0.365734	0.14263	0.999875	59.9941	55.3282	43.9682	66.4132	48.1524	45.3249	48.9103	34.3368
Uba7	-0.365463	0.334516	0.999875	43.9243	30.682	32.7422	16.2645	25.8503	8.49842	24.4552	30.5216
Gm42741	-0.365243	0.288386	0.999875	26.7831	34.7058	63.1458	30.4959	30.9189	16.9968	44.8345	31.4754
Icam1	-0.365149	0.427897	0.999875	16.0699	16.0955	17.7744	9.48761	14.6992	5.66562	8.15172	12.3994
Tcte1	-0.364915	0.501565	0.999875	6.42794	8.55072	12.6292	14.2314	11.1511	2.83281	8.15172	7.6304
Cxcl16	-0.36431	0.358952	0.999875	24.6405	21.6283	18.7099	14.2314	16.7266	16.9968	4.07586	17.1684
Serinc2	-0.363746	0.454168	0.999875	25.7118	17.1014	13.5646	31.1736	27.3709	0	16.3034	16.2146
Pak6	-0.36351	0.0152024	0.999875	333.182	275.635	360.632	250.744	238.735	226.625	260.855	227.958
Arhgef25	-0.363106	0.00549833	0.893581	436.029	417.476	449.972	359.174	330.985	280.448	293.462	364.351
Diaph1	-0.363072	0.00305669	0.702494	388.891	341.023	394.778	412.711	304.627	288.946	338.296	275.648
Parp3	-0.362868	0.234822	0.999875	43.9243	50.2983	48.6456	32.5289	43.0838	16.9968	24.4552	39.1058
Reep6	-0.362242	0.249411	0.999875	53.5662	25.1492	57.0651	38.6281	31.9327	33.9937	28.531	38.152
Ipcef1	-0.36186	0.289637	0.999875	287.115	197.169	443.424	513.008	347.711	215.293	252.703	298.539
NA	-0.361631	0.00657987	0.931647	29157.2	25685.8	22076.7	21328.1	22976.3	16804.2	16711	19927.7
Unc13d	-0.361464	0.50062	0.999875	11.7846	11.0656	13.5646	6.09917	10.6442	5.66562	4.07586	8.58419
Gmppb	-0.361309	0.0968658	0.999875	78.2067	61.364	71.0975	73.1901	60.8241	62.3218	36.6827	51.5052
Npepl1	-0.361289	0.0617159	0.999875	119.988	110.153	105.711	94.1984	94.2774	79.3186	52.9862	87.7495
Klf5	-0.360626	0.304381	0.999875	20.3552	36.2148	45.8391	58.9587	26.3571	31.1609	57.062	24.7988
1700120C14Rik	-0.360298	0.560442	0.999875	8.57059	11.5686	7.95169	6.09917	9.12362	0	4.07586	8.58419
Pgbd1	-0.360291	0.272666	0.999875	28.9257	30.682	25.2583	37.9504	16.7266	25.4953	24.4552	31.4754
Ptpn14	-0.359161	0.247217	0.999875	41.7816	67.9027	39.7584	46.7603	51.1936	31.1609	16.3034	40.0596
Ang	-0.358905	0.393618	0.999875	13.9272	18.6104	16.8389	16.9422	11.658	5.66562	12.2276	19.076
Slc26a1	-0.358671	0.352886	0.999875	14.9985	18.1074	23.3873	24.3967	17.2335	25.4953	8.15172	12.3994
Fam69c	-0.358374	0.195529	0.999875	34.2824	35.7118	43.0327	40.6612	34.467	31.1609	28.531	24.7988
Hvcn1	-0.358364	0.271175	0.999875	35.3537	36.7178	42.0972	23.0413	21.2884	22.6625	24.4552	37.1982
Gm43338	-0.358026	0.491027	0.999875	8.57059	9.55668	12.1614	10.843	6.08241	11.3312	16.3034	5.7228
Upp1	-0.357423	0.362069	0.999875	17.1412	38.7297	22.9196	18.2975	19.261	28.3281	20.3793	13.3532
Ptges3l	-0.356695	0.372131	0.999875	18.2125	18.1074	44.9037	21.0083	20.7816	19.8297	16.3034	21.9374
Cry1	-0.356635	0.0372955	0.999875	221.764	158.44	152.485	158.579	138.882	124.644	122.276	140.209
Gm29480	-0.35639	0.504989	0.999875	13.9272	11.5686	10.7582	8.80992	10.1374	5.66562	0	12.3994
Zbtb8b	-0.355663	0.368919	0.999875	35.3537	36.7178	17.3066	27.7851	27.8777	28.3281	0	24.7988
Rab7b	-0.355223	0.393653	0.999875	20.3552	25.1492	12.6292	13.5537	13.6854	16.9968	12.2276	13.3532
Gm43039	-0.354804	0.327997	0.999875	22.4978	20.6223	24.3228	18.2975	18.7541	8.49842	20.3793	17.1684
Ddx58	-0.35417	0.186484	0.999875	64.2794	71.9266	46.3069	42.6942	49.673	50.9905	40.7586	34.3368
Gm17322	-0.353631	0.305695	0.999875	21.4265	22.6342	24.7906	35.2397	16.2198	22.6625	28.531	20.9836
Fxyd6	-0.353363	0.0778071	0.999875	451.027	607.604	406.472	586.876	555.527	416.423	252.703	353.86
Dennd3	-0.35308	0.369173	0.999875	19.2838	24.1432	18.7099	25.7521	21.2884	25.4953	0	15.2608
Stac2	-0.352857	0.0157595	0.999875	261.403	224.331	228.26	208.727	204.268	161.47	175.262	166.915
Adgrd1	-0.352213	0.357681	0.999875	16.0699	19.6163	18.7099	32.5289	18.7541	16.9968	12.2276	17.1684
Irf9	-0.352044	0.134842	0.999875	196.052	124.237	120.211	91.4876	104.415	84.9842	85.593	126.855
9130024F11Rik	-0.3517	0.531113	0.999875	16.0699	3.52088	29.9358	41.3389	16.2198	14.164	12.2276	25.7526
C030005K06Rik	-0.351581	0.333321	0.999875	28.9257	41.7476	27.1293	22.3636	17.7404	42.4921	8.15172	26.7064
Fam111a	-0.351467	0.318019	0.999875	19.2838	22.1313	23.3873	29.1405	21.7953	19.8297	12.2276	16.2146
Eda	-0.351383	0.272406	0.999875	26.7831	26.1551	34.1455	31.8512	27.3709	14.164	20.3793	24.7988
Pld3	-0.351353	0.0118331	0.984178	2299.06	1669.9	2370.07	2397.65	1771	1586.37	2046.08	1465.04
Tceal7	-0.350983	0.557676	0.999875	12.8559	7.54475	10.7582	7.45455	9.12362	2.83281	0	11.4456
Arap3	-0.35001	0.248902	0.999875	37.4963	51.8073	68.7587	47.438	31.9327	65.1546	52.9862	28.614
Tigd3	-0.349815	0.388747	0.999875	14.9985	19.6163	15.4356	21.686	14.1923	22.6625	16.3034	8.58419
Med29	-0.349568	0.180575	0.999875	77.1353	70.9206	76.2427	57.6033	79.0714	42.4921	40.7586	43.8748
Gm42692	-0.349291	0.435398	0.999875	17.1412	13.0776	11.2259	14.9091	11.1511	14.164	16.3034	6.6766
Emx2	-0.348858	0.20823	0.999875	44.9956	41.2446	33.6777	41.3389	37.5082	28.3281	28.531	26.7064
Mgst1	-0.348848	0.167778	0.999875	122.131	192.643	93.0815	101.653	122.662	70.8202	85.593	107.779
Gm10706	-0.348628	0.60131	0.999875	10.7132	2.01193	17.3066	7.45455	5.06868	5.66562	16.3034	6.6766
Lrfn2	-0.348545	0.253862	0.999875	42.853	51.8073	26.1938	54.8926	35.4807	33.9937	24.4552	38.152
Sod3	-0.348203	0.27569	0.999875	56.7802	63.8789	30.4035	44.0496	51.7005	31.1609	40.7586	25.7526
Kremen1	-0.348181	0.0536911	0.999875	149.985	105.124	149.211	146.38	105.935	101.981	126.352	103.964
Mcts2	-0.348165	0.20705	0.999875	41.7816	56.8371	61.7425	46.0827	47.6456	28.3281	24.4552	48.6438
Nxph4	-0.348152	0.550661	0.999875	24.6405	14.0835	6.0807	8.13223	13.1786	14.164	12.2276	2.8614
Ap1s3	-0.348084	0.398538	0.999875	11.7846	14.0835	18.2421	23.0413	13.1786	11.3312	16.3034	13.3532
Fkbp7	-0.347812	0.368906	0.999875	44.9956	32.6939	17.7744	24.3967	26.3571	28.3281	4.07586	25.7526
Enc1	-0.347241	0.0193602	0.999875	1647.7	1248.4	1867.24	1974.78	1465.86	1178.45	1491.76	1165.54
Sgsm1	-0.347116	0.00750414	0.931647	567.802	651.866	613.216	584.843	571.747	450.416	464.648	401.55
Wdr6	-0.347018	0.244238	0.999875	768.139	1149.32	544.925	1078.88	924.02	736.53	493.179	619.97
2024-03-09	-0.346754	0.0893112	0.999875	98.5618	81.9863	71.5652	86.0661	65.3859	79.3186	69.2896	57.228
Sobp	-0.346495	0.0272691	0.999875	229.263	237.911	182.421	243.289	191.596	195.464	142.655	161.192
Gm6556	-0.346408	0.403082	0.999875	28.9257	13.0776	21.9841	46.7603	16.2198	25.4953	20.3793	25.7526
Gm12264	-0.346286	0.307579	0.999875	22.4978	22.6342	29.9358	22.3636	17.7404	14.164	24.4552	21.9374
Gm25117	-0.345667	0.547353	0.999875	11.7846	7.04177	11.2259	15.5868	7.09615	5.66562	0	17.1684
BC055324	-0.345523	0.347941	0.999875	26.7831	20.6223	27.597	18.2975	16.2198	14.164	12.2276	25.7526
Gm37174	-0.345351	0.492204	0.999875	8.57059	16.0955	9.35493	10.843	8.61675	5.66562	8.15172	11.4456
Nrp1	-0.345347	0.124781	0.999875	98.5618	184.092	175.405	177.554	143.444	87.817	101.896	151.654
Ms4a6d	-0.345248	0.464195	0.999875	7.49927	15.5925	22.9196	11.5207	11.658	8.49842	16.3034	11.4456
Dtwd1	-0.345171	0.0992271	0.999875	78.2067	77.4594	91.2106	82.6777	54.2348	90.6498	65.2137	62.9508
Lama3	-0.344744	0.255913	0.999875	51.4236	39.7357	89.8073	58.281	32.9464	65.1546	48.9103	50.5514
Itpripl2	-0.344436	0.173661	0.999875	94.2765	67.3998	60.3393	46.0827	50.1799	59.489	48.9103	51.5052
Fam131a	-0.344216	0.010347	0.966261	441.385	356.112	481.311	465.57	316.792	331.439	391.282	350.044
Gm26814	-0.343728	0.508003	0.999875	8.57059	10.0597	13.5646	18.9752	7.09615	2.83281	12.2276	17.1684
Lnpep	-0.343289	0.0140416	0.999875	251.761	283.683	260.535	278.529	222.008	223.792	146.731	228.912
Gm44898	-0.342954	0.420227	0.999875	25.7118	23.6402	25.2583	12.876	18.7541	16.9968	0	23.845
Pgpep1l	-0.342802	0.518705	0.999875	5.35662	14.5865	14.5001	16.2645	15.206	2.83281	8.15172	9.53799
Prom1	-0.342733	0.233628	0.999875	59.9941	51.8073	41.1617	31.8512	28.3846	39.6593	44.8345	39.1058
Hmces	-0.342374	0.06933	0.999875	102.847	80.9803	104.307	96.2314	76.537	73.653	69.2896	78.2115
Gm43413	-0.342366	0.451919	0.999875	8.57059	15.5925	30.4035	14.9091	13.1786	16.9968	12.2276	14.307
Cdca7l	-0.341995	0.555755	0.999875	7.49927	7.54475	9.82267	9.48761	8.10988	5.66562	0	8.58419
Il4ra	-0.341918	0.295206	0.999875	40.7103	33.1969	32.2745	23.719	32.9464	22.6625	16.3034	21.9374
Ipo4	-0.341832	0.00217495	0.694634	369.607	392.327	398.52	387.636	314.258	303.11	330.145	285.186
Rhoc	-0.341709	0.177155	0.999875	79.278	97.0758	74.8394	68.4463	77.5508	87.817	24.4552	51.5052
Ngb	-0.341563	0.297112	0.999875	70.7074	96.5728	55.6618	90.1322	108.977	45.3249	32.6069	42.921
Ccdc85c	-0.341331	0.0333544	0.999875	131.773	142.344	138.921	123.339	103.908	93.4827	122.276	108.733
Zic4	-0.341321	0.558071	0.999875	87.8486	154.919	139.388	134.182	172.335	25.4953	52.9862	147.839
Spry4	-0.341128	0.15178	0.999875	70.7074	70.9206	47.7101	73.1901	56.2623	56.6562	40.7586	47.69
Gm20559	-0.340498	0.406238	0.999875	22.4978	19.1134	16.8389	10.843	12.6717	16.9968	12.2276	13.3532
NA	-0.340349	0.0362348	0.999875	418.888	381.764	296.083	283.95	319.327	246.454	248.627	256.572
NA	-0.340272	0.0082463	0.931647	1245.95	1134.73	1014.54	1044.99	1024.38	801.685	696.972	933.77
Ucp2	-0.340258	0.485276	0.999875	197.124	273.12	81.3879	170.099	243.803	101.981	81.5172	133.532
Rhbdf1	-0.339997	0.221628	0.999875	64.2794	71.9266	39.7584	47.438	47.1387	28.3281	40.7586	51.5052
Gm16049	-0.339808	0.525391	0.999875	10.7132	9.0537	10.2904	8.13223	5.06868	8.49842	16.3034	6.6766
Abcb1a	-0.339667	0.137135	0.999875	100.704	95.5668	75.7749	59.6364	58.2898	56.6562	77.4413	72.4888
A930024N18Rik	-0.339666	0.373873	0.999875	28.9257	27.6641	22.9196	25.0744	18.2472	8.49842	52.9862	15.2608
Mxra8	-0.339382	0.245373	0.999875	35.3537	47.7834	36.4842	47.438	40.0425	14.164	36.6827	34.3368
Gm20605	-0.339138	0.394037	0.999875	19.2838	18.1074	21.5163	14.2314	12.1648	11.3312	12.2276	20.0298
Pcdha3	-0.33905	0.403712	0.999875	9.64192	25.6521	29.468	25.0744	15.7129	31.1609	12.2276	16.2146
Smpdl3b	-0.338827	0.175267	0.999875	59.9941	46.7774	77.1782	61.6694	50.6868	65.1546	36.6827	41.9672
Nxf7	-0.338763	0.506228	0.999875	8.57059	9.55668	27.1293	14.9091	9.12362	11.3312	8.15172	18.1222
Cpne6	-0.33872	0.00325534	0.702494	506.736	570.886	464.004	496.744	411.577	393.76	366.827	422.533
Synpo	-0.338691	0.0587629	0.999875	601.013	420.494	671.216	660.066	415.125	407.924	656.213	410.134
Gm17022	-0.338358	0.372953	0.999875	19.2838	16.0955	20.5808	18.9752	13.6854	19.8297	8.15172	16.2146
Inmt	-0.338247	0.518661	0.999875	22.4978	14.0835	6.54845	16.2645	12.1648	11.3312	0	16.2146
Fam217a	-0.338157	0.542795	0.999875	9.64192	13.0776	7.48394	10.1653	11.1511	2.83281	4.07586	8.58419
Ptprc	-0.338042	0.152675	0.999875	78.2067	115.183	92.146	65.0579	77.0439	48.1577	65.2137	78.2115
Ube4bos3	-0.337845	0.528417	0.999875	13.9272	9.55668	22.9196	9.48761	15.206	8.49842	0	13.3532
Tcf7l1	-0.337578	0.343934	0.999875	28.9257	25.1492	20.1131	23.719	19.7678	22.6625	4.07586	22.8912
Gm47358	-0.337293	0.444709	0.999875	14.9985	15.0895	33.6777	15.5868	15.206	8.49842	32.6069	13.3532
Gm3257	-0.33711	0.512916	0.999875	12.8559	18.1074	8.41944	10.1653	13.1786	14.164	4.07586	5.7228
9930111J21Rik2	-0.336916	0.399436	0.999875	26.7831	13.5805	17.3066	21.0083	11.1511	16.9968	20.3793	17.1684
Dusp5	-0.336718	0.266481	0.999875	53.5662	33.1969	63.1458	46.7603	46.125	19.8297	32.6069	45.7824
Slc5a5	-0.336693	0.322188	0.999875	86.7772	92.0459	29.0003	63.0248	62.3447	73.653	40.7586	36.2444
H2-M3	-0.336552	0.316893	0.999875	34.2824	30.682	23.8551	21.686	25.3434	16.9968	16.3034	21.9374
Prtn3	-0.336143	0.56492	0.999875	4.2853	11.5686	11.2259	12.1983	9.12362	5.66562	0	11.4456
Gfra1	-0.336142	0.00500559	0.886436	477.81	562.335	598.715	553.67	459.222	484.41	399.434	395.827
Snx20	-0.336102	0.47888	0.999875	17.1412	13.5805	12.1614	7.45455	9.12362	8.49842	12.2276	10.4918
Ankfn1	-0.33609	0.169972	0.999875	51.4236	68.9087	64.549	61.6694	57.2761	45.3249	24.4552	53.4128
Smoc1	-0.33567	0.246772	0.999875	82.4919	90.034	42.0972	71.157	56.2623	90.6498	36.6827	43.8748
Golga7b	-0.335623	0.0374888	0.999875	224.978	214.774	195.518	227.025	204.775	161.47	118.2	167.869
Cenpw	-0.335596	0.430557	0.999875	23.5691	11.0656	19.1776	19.6529	10.6442	16.9968	8.15172	20.0298
Gm5898	-0.335261	0.554813	0.999875	9.64192	9.55668	9.35493	6.77686	10.1374	2.83281	8.15172	4.769
Scnn1a	-0.335185	0.404962	0.999875	14.9985	16.5984	22.4518	31.1736	21.2884	8.49842	24.4552	13.3532
Tmem200a	-0.335152	0.292233	0.999875	25.7118	52.8132	36.952	46.0827	41.5632	36.8265	24.4552	22.8912
Tnfaip8l2	-0.334813	0.492276	0.999875	29.9971	19.6163	9.35493	9.48761	13.6854	11.3312	8.15172	16.2146
Tyrobp	-0.3347	0.13887	0.999875	119.988	167.493	118.808	77.9339	99.8529	93.4827	97.8206	93.4723
9530059O14Rik	-0.334252	0.454334	0.999875	12.8559	18.6104	26.6615	11.5207	13.1786	5.66562	16.3034	19.076
Tor3a	-0.333941	0.139975	0.999875	98.5618	106.129	75.7749	79.967	84.14	42.4921	65.2137	78.2115
Gm10643	-0.333876	0.483713	0.999875	9.64192	17.1014	10.7582	12.876	8.10988	16.9968	4.07586	11.4456
NA	-0.333498	0.527656	0.999875	19.2838	7.04177	13.5646	6.77686	9.12362	8.49842	8.15172	9.53799
Sugct	-0.3332	0.282688	0.999875	43.9243	56.8371	29.0003	32.5289	34.9739	22.6625	32.6069	34.3368
Gpr26	-0.332497	0.0211364	0.999875	1046.68	849.539	892.46	787.471	628.009	640.215	953.751	654.306
Otud3	-0.332319	0.120332	0.999875	88.9199	61.364	71.5652	73.1901	59.3035	50.9905	69.2896	55.3204
Slc7a5	-0.332124	0.16327	0.999875	133.915	161.458	83.2589	121.983	130.265	90.6498	73.3655	87.7495
Dlgap2	-0.332	0.111607	0.999875	251.761	184.092	399.923	293.438	215.926	203.962	277.158	211.743
Rmnd5b	-0.331969	0.0342045	0.999875	205.694	189.122	233.405	237.19	197.172	138.808	187.49	157.377
Fzd5	-0.331707	0.220858	0.999875	48.2096	37.2208	35.081	48.7934	29.9052	39.6593	36.6827	32.4292
Lppos	-0.331494	0.504738	0.999875	9.64192	10.5626	13.5646	13.5537	9.63049	19.8297	0	7.6304
Gm20939	-0.330907	0.428702	0.999875	18.2125	15.5925	14.5001	16.9422	9.12362	22.6625	8.15172	14.307
Slc16a2	-0.330741	0.110741	0.999875	163.913	144.356	114.13	199.24	152.06	107.647	114.124	107.779
Fbxl6	-0.330675	0.0680041	0.999875	101.776	118.704	143.598	116.562	100.36	84.9842	114.124	89.6571
AC061963.1	-0.330596	0.435432	0.999875	12.8559	16.0955	24.7906	17.6198	14.6992	2.83281	24.4552	16.2146
Pfkl	-0.330543	0.00423367	0.83466	755.283	738.379	608.07	685.141	595.57	518.404	591	509.329
Ephb4	-0.330541	0.393299	0.999875	24.6405	18.6104	13.5646	21.686	15.206	11.3312	16.3034	17.1684
Aard	-0.330411	0.351904	0.999875	32.1397	35.2088	17.3066	31.8512	27.3709	22.6625	12.2276	22.8912
Mcm3	-0.330205	0.355064	0.999875	35.3537	32.6939	26.6615	27.1074	22.809	31.1609	44.8345	11.4456
A330074H02Rik	-0.330046	0.485009	0.999875	10.7132	9.0537	20.5808	17.6198	9.12362	14.164	20.3793	9.53799
Dhcr7	-0.329982	0.036323	0.999875	179.982	152.404	160.437	155.868	134.32	152.972	122.276	109.687
Tmem198	-0.329685	0.0558632	0.999875	136.058	108.644	139.856	146.38	106.442	104.814	118.2	98.2413
Unc5d	-0.329662	0.102706	0.999875	241.048	373.214	269.422	267.008	269.147	246.454	118.2	255.618
Sp8	-0.32935	0.276206	0.999875	28.9257	31.6879	35.081	27.1074	25.8503	31.1609	16.3034	22.8912
Slc11a1	-0.329204	0.325906	0.999875	25.7118	49.2924	33.21	22.3636	25.8503	28.3281	24.4552	26.7064
Zfp697	-0.329002	0.136502	0.999875	64.2794	60.861	61.2748	75.2232	54.2348	50.9905	36.6827	56.2742
Gm27616	-0.32864	0.416972	0.999875	23.5691	20.6223	41.1617	18.9752	26.864	14.164	8.15172	24.7988
Bicdl1	-0.328472	0.0329038	0.999875	267.831	260.042	295.616	200.595	209.843	220.959	203.793	185.991
Gm12576	-0.328375	0.565569	0.999875	7.49927	11.5686	12.1614	5.42149	8.61675	2.83281	16.3034	4.769
Lamb3	-0.328294	0.267842	0.999875	29.9971	36.7178	35.5487	27.1074	23.8228	25.4953	24.4552	29.5678
Thpo	-0.328225	0.390939	0.999875	28.9257	21.1253	33.6777	13.5537	18.7541	16.9968	16.3034	22.8912
Mef2c	-0.32798	0.0201257	0.999875	1424.86	986.853	1443.93	1547.84	990.42	1084.97	1218.68	1030.1
Rras2	-0.327949	0.238749	0.999875	52.4949	54.8252	46.3069	49.4711	51.1936	31.1609	16.3034	44.8286
Ribc1	-0.327949	0.511355	0.999875	6.42794	13.0776	11.2259	16.9422	12.1648	5.66562	12.2276	7.6304
Mtr	-0.327653	0.120577	0.999875	83.5633	126.249	123.017	153.835	112.018	84.9842	110.048	82.9805
Kcnh5	-0.327594	0.155755	0.999875	78.2067	67.9027	53.3231	58.9587	46.125	65.1546	44.8345	51.5052
Ripor2	-0.327416	0.0314152	0.999875	466.026	522.6	655.313	639.736	529.17	362.599	505.407	419.672
Proser3	-0.327393	0.363727	0.999875	21.4265	34.7058	37.4197	29.1405	37.0013	14.164	20.3793	19.076
Parp9	-0.327371	0.23756	0.999875	44.9956	55.3282	41.1617	32.5289	32.4395	45.3249	28.531	34.3368
Plcg2	-0.327305	0.298707	0.999875	40.7103	42.2506	34.6132	25.0744	22.3022	45.3249	28.531	25.7526
Camk2a	-0.327299	0.0152786	0.999875	8442.03	6470.38	9674.87	8538.84	6753	5555.14	7735.98	6370.43
Stk40	-0.326985	0.0504487	0.999875	211.051	197.169	146.872	157.901	140.402	141.64	134.503	145.931
Plekhg4	-0.326769	0.357837	0.999875	33.211	42.7536	61.7425	21.686	42.5769	28.3281	28.531	24.7988
Pabpc5	-0.326452	0.356571	0.999875	21.4265	21.1253	21.0486	19.6529	15.7129	14.164	16.3034	19.076
Dlk2	-0.326368	0.173083	0.999875	129.63	132.788	173.534	90.8099	116.073	93.4827	57.062	133.532
Cfap157	-0.32609	0.342667	0.999875	22.4978	26.1551	22.4518	28.4628	18.2472	16.9968	12.2276	26.7064
Rpl12	-0.325861	0.02755	0.999875	1882.32	1706.62	1583.32	1425.17	1652.39	1311.59	961.903	1293.35
Wnt2	-0.325815	0.252567	0.999875	51.4236	34.2029	53.3231	39.9835	43.5906	28.3281	40.7586	27.6602
Prss35	-0.325515	0.419583	0.999875	13.9272	21.6283	22.4518	20.3306	22.3022	14.164	12.2276	10.4918
3010001F23Rik	-0.325322	0.520832	0.999875	7.49927	14.0835	16.3711	11.5207	13.1786	5.66562	4.07586	11.4456
9530052E02Rik	-0.325282	0.555876	0.999875	5.35662	7.54475	13.0969	12.1983	9.12362	11.3312	4.07586	5.7228
Gfod1	-0.3251	0.0249922	0.999875	426.387	300.784	422.843	436.43	334.026	311.609	317.917	298.539
Hmgcr	-0.324958	0.0184089	0.999875	755.283	584.467	876.557	820	590.501	589.224	554.317	676.244
Gm37941	-0.324929	0.435698	0.999875	10.7132	17.1014	15.9034	25.7521	12.6717	11.3312	16.3034	16.2146
Hkdc1	-0.324552	0.599347	0.999875	5.35662	7.54475	10.7582	16.9422	13.6854	0	8.15172	6.6766
Nptx2	-0.324457	0.110568	0.999875	160.699	112.668	181.018	122.661	96.3049	144.473	110.048	118.271
5430402O13Rik	-0.324369	0.549068	0.999875	4.2853	17.1014	10.7582	10.1653	8.10988	14.164	8.15172	6.6766
Gm18180	-0.324287	0.498786	0.999875	10.7132	11.0656	15.9034	14.2314	14.1923	8.49842	4.07586	9.53799
Prkag2os2	-0.324158	0.355531	0.999875	22.4978	31.6879	36.4842	47.438	16.7266	28.3281	28.531	40.0596
Gm16907	-0.323961	0.390737	0.999875	16.0699	22.1313	29.468	18.9752	15.206	11.3312	20.3793	22.8912
Gm4247	-0.323883	0.436561	0.999875	22.4978	15.0895	14.9679	12.1983	12.6717	14.164	16.3034	10.4918
Maml3	-0.323815	0.270371	0.999875	41.7816	46.2745	63.6135	31.1736	41.0563	39.6593	24.4552	36.2444
Fam135b	-0.32381	0.102414	0.999875	140.343	124.237	164.647	124.694	140.909	104.814	101.896	85.8419
Vwa1	-0.323314	0.272842	0.999875	124.274	171.014	53.7908	84.0331	77.5508	79.3186	97.8206	93.4723
Pcdhgc5	-0.32319	0.135935	0.999875	264.617	181.577	226.389	297.504	184.5	167.136	309.765	139.255
Cnmd	-0.322928	0.534072	0.999875	23.5691	22.1313	9.35493	12.1983	19.261	8.49842	0	16.2146
C230012O17Rik	-0.322911	0.396592	0.999875	14.9985	21.1253	21.5163	19.6529	13.1786	14.164	12.2276	20.9836
Zfp457	-0.322628	0.596309	0.999875	8.57059	8.04773	9.35493	7.45455	10.6442	8.49842	4.07586	1.9076
Trem2	-0.322606	0.151289	0.999875	228.192	225.337	158.566	107.752	144.457	127.476	130.427	164.053
Gnb4	-0.322285	0.0441593	0.999875	359.965	321.909	530.424	446.595	322.875	331.439	346.448	332.876
Prkd2	-0.321923	0.318865	0.999875	35.3537	31.6879	28.0648	20.3306	20.2747	22.6625	24.4552	25.7526
Arid3b	-0.321871	0.225451	0.999875	91.0625	68.9087	122.55	85.3884	57.7829	42.4921	89.6689	103.964
Tshz3	-0.321853	0.193806	0.999875	57.8515	46.2745	47.2424	58.281	48.6593	39.6593	40.7586	34.3368
Myom3	-0.32183	0.366647	0.999875	34.2824	16.0955	27.1293	31.1736	20.2747	28.3281	12.2276	22.8912
Adrb1	-0.321666	0.113061	0.999875	95.3478	77.9624	73.9039	82	57.7829	59.489	81.5172	70.5812
Cpne2	-0.320965	0.0638089	0.999875	157.485	225.337	161.84	178.231	166.253	133.142	138.579	133.532
Loxl3	-0.320945	0.193733	0.999875	52.4949	46.7774	43.9682	48.1157	39.5357	28.3281	52.9862	35.2906
NA	-0.320914	0.435712	0.999875	13.9272	16.0955	18.7099	14.2314	14.6992	11.3312	16.3034	9.53799
Cabp7	-0.320895	0.23144	0.999875	137.129	174.535	88.4041	82.6777	117.593	82.1514	57.062	111.595
Pkig	-0.320732	0.0203458	0.999875	385.677	338.508	407.875	330.033	338.081	283.281	244.552	279.463
Adra1a	-0.320604	0.135603	0.999875	58.9228	76.9564	68.291	73.8678	55.7554	48.1577	48.9103	63.9046
Gm7598	-0.320431	0.478298	0.999875	19.2838	12.5746	11.6937	12.1983	10.1374	8.49842	8.15172	14.307
Kcnj11	-0.31979	0.0781306	0.999875	171.412	117.195	142.663	134.86	124.183	110.48	126.352	93.4723
2900089D17Rik	-0.319712	0.429867	0.999875	14.9985	22.1313	20.1131	13.5537	12.6717	11.3312	12.2276	19.076
Zfp94	-0.319568	0.146898	0.999875	72.85	71.9266	80.4524	79.2893	74.5096	56.6562	36.6827	59.1356
Kcnh1	-0.319486	0.0404	0.999875	291.4	233.384	268.954	334.099	244.817	212.461	260.855	191.714
Trim62	-0.319148	0.154645	0.999875	121.06	110.153	87.0008	90.1322	67.4134	79.3186	134.503	69.6274
Frmpd3	-0.319091	0.0665639	0.999875	164.984	188.116	146.872	183.653	162.198	127.476	97.8206	136.393
Disp3	-0.319074	0.139681	0.999875	112.489	119.71	107.114	78.6116	103.401	70.8202	61.1379	82.0267
Ak5	-0.318795	0.0167081	0.999875	336.396	350.579	323.681	377.471	297.531	311.609	285.31	228.912
Neurl1b	-0.318409	0.0476492	0.999875	199.266	165.984	188.97	216.182	170.308	113.312	167.11	155.469
Crhr1	-0.318181	0.217278	0.999875	43.9243	51.8073	47.2424	58.281	38.0151	56.6562	48.9103	30.5216
B4galt2	-0.317857	0.0185142	0.999875	378.177	305.814	417.23	338.843	300.573	274.782	289.386	285.186
Dgkz	-0.317689	0.00286981	0.702494	1302.73	1078.9	1277.42	1103.27	918.951	906.498	937.448	1045.36
Nfatc1	-0.317629	0.426929	0.999875	28.9257	39.7357	29.9358	18.9752	37.5082	11.3312	28.531	13.3532
Strip2	-0.317606	0.00051598	0.410673	1027.4	1109.08	1055.7	980.612	814.03	838.511	892.613	825.036
Lsr	-0.317358	0.570246	0.999875	6.42794	8.04773	14.0324	8.13223	7.60302	5.66562	16.3034	4.769
Phf11d	-0.317249	0.581121	0.999875	11.7846	9.0537	10.2904	4.06612	6.58928	2.83281	12.2276	7.6304
Mettl11b	-0.317136	0.594215	0.999875	8.57059	13.5805	15.4356	11.5207	19.261	0	4.07586	8.58419
Hspb8	-0.316848	0.259854	0.999875	128.559	106.632	68.291	86.7438	120.128	62.3218	61.1379	54.3666
Faap100	-0.316054	0.18268	0.999875	56.7802	54.8252	66.8877	58.9587	37.5082	59.489	57.062	49.5976
Ilk	-0.315893	0.114565	0.999875	112.489	98.0817	93.5493	74.5455	81.6057	82.1514	69.2896	67.7198
2900026A02Rik	-0.315717	0.0522741	0.999875	153.199	131.782	148.276	157.223	124.183	87.817	130.427	123.994
Gm15518	-0.315683	0.620166	0.999875	2.14265	5.02983	14.0324	12.876	7.60302	5.66562	8.15172	6.6766
Zfp973	-0.315365	0.571526	0.999875	10.7132	5.53282	10.2904	9.48761	7.60302	5.66562	4.07586	8.58419
Cnih2	-0.315123	0.00949672	0.957341	635.295	559.82	682.442	555.025	539.814	501.407	468.724	437.794
Cnih3	-0.314986	0.145772	0.999875	88.9199	92.5489	127.695	141.636	103.401	62.3218	97.8206	92.5185
H2-Eb1	-0.314791	0.607515	0.999875	8.57059	29.173	4.20972	9.48761	12.1648	14.164	4.07586	9.53799
Lmf2	-0.314699	0.160789	0.999875	58.9228	81.4833	66.8877	63.7025	61.8379	53.8233	40.7586	53.4128
Cebpd	-0.314554	0.482347	0.999875	18.2125	38.7297	19.1776	13.5537	26.864	16.9968	8.15172	14.307
Lrfn1	-0.31434	0.0909581	0.999875	107.132	104.621	84.1944	100.298	85.1538	73.653	81.5172	74.3964
Eif4e3	-0.314268	0.0687204	0.999875	152.128	124.74	146.872	161.289	132.799	121.811	85.593	112.548
Cbfa2t3	-0.314266	0.186936	0.999875	61.0655	48.7894	69.2265	56.2479	53.728	48.1577	44.8345	40.0596
Cd84	-0.313994	0.210424	0.999875	83.5633	104.621	72.5007	52.8595	51.7005	73.653	57.062	72.4888
Gm29650	-0.313945	0.9192	0.999875	59.9941	76.9564	0	0	0	56.6562	0	53.4128
Apoa2	-0.313723	0.589581	0.999875	11.7846	8.55072	7.48394	8.80992	11.658	2.83281	8.15172	3.8152
NA	-0.313529	0.370436	0.999875	29.9971	67.9027	66.42	25.0744	41.5632	28.3281	36.6827	43.8748
Gm28294	-0.312979	0.536879	0.999875	9.64192	13.0776	12.6292	6.77686	9.12362	11.3312	8.15172	6.6766
Igfbpl1	-0.312817	0.475989	0.999875	12.8559	20.1193	31.339	22.3636	26.864	14.164	4.07586	16.2146
Cage1	-0.312799	0.262069	0.999875	39.639	43.7595	36.4842	44.7273	33.9601	36.8265	12.2276	39.1058
Abi3	-0.31258	0.490251	0.999875	11.7846	18.6104	11.2259	12.1983	9.63049	16.9968	8.15172	10.4918
Rnf157	-0.312518	0.00807453	0.931647	989.903	863.622	919.589	918.942	767.398	753.527	872.234	609.478
Sox1	-0.312459	0.0508473	0.999875	183.196	208.235	199.728	187.719	183.993	138.808	179.338	126.855
Gm17276	-0.312419	0.35766	0.999875	26.7831	24.6462	30.4035	21.686	16.7266	19.8297	36.6827	20.0298
Zfp217	-0.312119	0.309204	0.999875	39.639	44.7655	29.468	38.6281	30.4121	53.8233	16.3034	23.845
Psmb10	-0.311796	0.156024	0.999875	184.268	218.295	133.308	118.595	144.457	133.142	85.593	146.885
Prrg2	-0.311769	0.385846	0.999875	21.4265	29.676	26.6615	16.2645	21.7953	14.164	20.3793	18.1222
Gm45640	-0.311751	0.35848	0.999875	18.2125	24.1432	28.5325	23.719	17.7404	19.8297	24.4552	19.076
Dtx3l	-0.311307	0.294425	0.999875	47.1383	49.2924	39.7584	30.4959	42.5769	22.6625	40.7586	25.7526
Prkg1	-0.310997	0.181036	0.999875	65.3508	80.9803	73.4362	63.7025	71.9752	56.6562	36.6827	50.5514
Pcdhga2	-0.310942	0.2077	0.999875	49.2809	48.7894	44.9037	48.7934	37.0013	42.4921	52.9862	32.4292
Gm45718	-0.310713	0.327688	0.999875	44.9956	27.6641	36.4842	37.9504	19.7678	31.1609	48.9103	30.5216
3110021N24Rik	-0.310511	0.520986	0.999875	11.7846	13.5805	11.6937	12.1983	6.08241	19.8297	12.2276	8.58419
Galnt15	-0.310214	0.533198	0.999875	12.8559	15.5925	12.6292	12.876	15.206	2.83281	4.07586	13.3532
Sfrp4	-0.309948	0.537012	0.999875	11.7846	10.0597	14.0324	8.80992	5.57554	8.49842	12.2276	12.3994
Tmem121	-0.309488	0.215077	0.999875	79.278	65.8908	57.0651	50.8265	57.7829	28.3281	69.2896	46.7362
Tbcc	-0.309428	0.153212	0.999875	119.988	88.0221	84.6621	90.8099	96.3049	73.653	61.1379	63.9046
2700049A03Rik	-0.309286	0.201572	0.999875	58.9228	74.4415	96.8235	84.7108	74.5096	45.3249	44.8345	74.3964
Gm13716	-0.309105	0.319332	0.999875	31.0684	36.2148	27.597	29.8182	24.3297	31.1609	36.6827	18.1222
Mrps34	-0.308862	0.129812	0.999875	85.7059	95.0638	85.5976	78.6116	78.0576	79.3186	73.3655	52.459
Ints1	-0.30866	0.0112142	0.984178	398.533	432.063	486.924	403.901	365.452	303.11	358.676	355.767
Gm37422	-0.308548	0.348618	0.999875	38.5677	35.2088	25.2583	25.7521	22.809	19.8297	16.3034	34.3368
Gm37899	-0.308471	0.65577	0.999875	7.49927	13.0776	10.7582	2.03306	4.56181	2.83281	4.07586	13.3532
Egfl8	-0.308277	0.549304	0.999875	13.9272	10.5626	8.88718	11.5207	5.06868	8.49842	8.15172	14.307
4933408B17Rik	-0.308121	0.518587	0.999875	8.57059	15.0895	17.7744	14.2314	7.09615	5.66562	20.3793	16.2146
Nhp2	-0.307865	0.0684825	0.999875	235.691	234.893	254.454	210.76	219.981	121.811	175.262	212.697
Ccl3	-0.307788	0.571845	0.999875	9.64192	16.5984	16.3711	4.7438	8.61675	16.9968	12.2276	5.7228
Neurl1a	-0.307375	0.0418477	0.999875	684.576	512.037	788.153	630.248	551.979	436.252	635.834	497.883
NA	-0.307315	0.0164894	0.999875	2996.49	2790.55	2225.54	2261.44	2375.69	1804.5	1952.34	2136.51
6430573F11Rik	-0.307091	0.0535782	0.999875	145.7	133.794	133.308	125.372	115.059	110.48	97.8206	103.964
Aldh18a1	-0.306478	0.106542	0.999875	124.274	125.243	93.0815	119.95	103.401	67.9874	97.8206	94.4261
Gadl1	-0.306071	0.61276	0.999875	6.42794	12.0716	8.41944	9.48761	9.12362	2.83281	0	11.4456
Exosc4	-0.306048	0.138483	0.999875	91.0625	71.9266	66.8877	74.5455	58.7967	56.6562	61.1379	65.8122
Col19a1	-0.305866	0.224323	0.999875	64.2794	60.861	72.9684	68.4463	50.6868	48.1577	24.4552	76.304
Trp53i11	-0.305833	0.135966	0.999875	157.485	155.925	127.227	180.942	157.636	113.312	146.731	85.8419
Rapgef4os3	-0.305824	0.345908	0.999875	18.2125	35.7118	39.2907	33.2066	23.8228	19.8297	32.6069	29.5678
Frem2	-0.305413	0.325353	0.999875	46.0669	44.2625	30.8713	31.8512	30.9189	45.3249	36.6827	19.076
Tmem39b	-0.305263	0.214988	0.999875	49.2809	44.7655	58.4683	52.1818	38.5219	45.3249	28.531	48.6438
Irs4	-0.305221	0.736941	0.999875	43.9243	112.165	9.82267	125.372	105.935	50.9905	8.15172	66.766
Gm28578	-0.305194	0.296657	0.999875	32.1397	31.6879	46.3069	47.438	32.9464	19.8297	48.9103	30.5216
R3hdm1	-0.305113	0.00833066	0.931647	1723.76	1643.75	2219.46	1754.53	1445.59	1453.23	1410.25	1623.37
Pcdhgb5	-0.305003	0.297677	0.999875	51.4236	33.6999	29.468	46.7603	32.9464	31.1609	40.7586	27.6602
Ano2	-0.304989	0.181513	0.999875	152.128	109.147	154.824	166.711	108.47	62.3218	130.427	161.192
Ptprn	-0.304449	0.00529435	0.886436	1852.32	1720.2	2105.33	1758.6	1409.09	1439.07	1773	1439.28
Fam174b	-0.30438	0.218399	0.999875	99.6331	82.9922	82.3234	101.653	106.949	70.8202	48.9103	53.4128
Dusp4	-0.304338	0.274086	0.999875	66.4221	51.3043	36.4842	37.2727	35.4807	36.8265	44.8345	39.1058
Chsy3	-0.304039	0.184783	0.999875	67.4934	52.3103	66.8877	63.7025	45.6181	48.1577	73.3655	47.69
Uvrag	-0.303913	0.0969511	0.999875	184.268	144.859	166.985	212.116	163.718	104.814	175.262	127.809
Cdk20	-0.303907	0.211949	0.999875	50.3522	55.3282	56.5973	44.0496	47.6456	36.8265	36.6827	40.0596
Susd2	-0.303659	0.667985	0.999875	74.9927	69.9147	44.4359	63.0248	64.8791	70.8202	0	63.9046
2610028D06Rik	-0.303644	0.567753	0.999875	9.64192	9.55668	13.5646	6.09917	7.60302	5.66562	8.15172	9.53799
Rapgefl1	-0.303132	0.00788356	0.931647	394.247	381.261	426.117	435.752	349.232	308.776	321.993	333.83
Rin1	-0.302874	0.139369	0.999875	303.185	256.521	491.601	330.711	265.092	206.795	374.979	286.14
Il17ra	-0.302447	0.178444	0.999875	89.9912	54.8252	78.5814	84.0331	64.8791	62.3218	52.9862	61.997
Ndnf	-0.302293	0.130948	0.999875	84.6346	89.028	108.985	77.9339	76.537	82.1514	57.062	72.4888
Erich6	-0.30223	0.41167	0.999875	34.2824	14.5865	32.7422	23.0413	19.7678	25.4953	20.3793	20.0298
Susd1	-0.302119	0.161083	0.999875	99.6331	68.9087	94.9525	115.884	68.934	67.9874	93.7448	82.0267
Edn1	-0.302001	0.560585	0.999875	5.35662	15.0895	11.2259	9.48761	7.60302	11.3312	8.15172	8.58419
Tdp1	-0.301671	0.157099	0.999875	107.132	91.543	78.1137	93.5207	93.7705	65.1546	61.1379	64.8584
Shroom1	-0.301554	0.286835	0.999875	61.0655	45.7715	60.3393	33.8843	50.1799	31.1609	36.6827	37.1982
Fndc9	-0.301435	0.196555	0.999875	61.0655	87.0161	91.2106	85.3884	80.592	79.3186	57.062	46.7362
2900055J20Rik	-0.301405	0.353766	0.999875	34.2824	20.6223	30.4035	43.3719	24.3297	25.4953	28.531	26.7064
AU023762	-0.300862	0.528114	0.999875	12.8559	10.0597	20.1131	10.1653	10.1374	8.49842	8.15172	14.307
Clec18a	-0.300668	0.585574	0.999875	9.64192	18.1074	7.48394	21.0083	19.261	2.83281	8.15172	9.53799
Ldha	-0.300618	0.00290149	0.702494	1458.07	1498.39	1528.13	1520.73	1383.24	1212.44	1198.3	1071.12
Zbtb46	-0.300558	0.270296	0.999875	37.4963	55.8311	82.3234	63.0248	51.7005	36.8265	44.8345	56.2742
Upb1	-0.30042	0.326447	0.999875	37.4963	29.676	48.6456	37.2727	28.3846	14.164	48.9103	36.2444
Il10rb	-0.300341	0.327056	0.999875	34.2824	56.8371	33.21	39.3058	41.5632	19.8297	40.7586	28.614
Armc6	-0.300323	0.0742071	0.999875	140.343	112.165	126.759	119.95	107.456	90.6498	97.8206	100.149
Klhl3	-0.300301	0.100555	0.999875	162.841	123.231	190.373	146.38	117.593	118.978	118.2	145.931
I830077J02Rik	-0.300065	0.450073	0.999875	13.9272	15.0895	16.8389	19.6529	12.6717	14.164	12.2276	14.307
Cntnap5c	-0.300016	0.229002	0.999875	63.2081	81.9863	62.678	52.8595	52.7142	59.489	24.4552	63.9046
Nucb1	-0.299886	0.0837222	0.999875	289.257	285.695	191.308	278.529	252.927	189.798	195.641	193.621
Ninl	-0.299694	0.304878	0.999875	56.7802	31.6879	44.4359	35.9174	31.9327	31.1609	24.4552	41.9672
Pld6	-0.299595	0.495388	0.999875	13.9272	17.6044	16.8389	10.1653	12.1648	16.9968	4.07586	12.3994
Fxyd2	-0.299374	0.513725	0.999875	17.1412	9.0537	27.597	21.0083	19.7678	5.66562	16.3034	15.2608
Sstr5	-0.299041	0.509401	0.999875	10.7132	11.5686	18.2421	24.3967	17.7404	11.3312	12.2276	9.53799
Gm26645	-0.298849	0.529434	0.999875	34.2824	8.04773	16.8389	26.4298	11.1511	14.164	32.6069	17.1684
2810405F17Rik	-0.298425	0.574792	0.999875	13.9272	13.0776	16.3711	5.42149	10.6442	5.66562	4.07586	14.307
Nop16	-0.298127	0.0659224	0.999875	144.629	137.314	141.259	147.736	130.265	110.48	126.352	97.2875
Col7a1	-0.298062	0.350747	0.999875	34.2824	26.1551	41.6294	23.719	25.8503	25.4953	20.3793	27.6602
Gm10654	-0.297987	0.486215	0.999875	14.9985	16.0955	17.3066	14.9091	11.658	11.3312	4.07586	19.076
Tlr2	-0.297724	0.413363	0.999875	35.3537	42.7536	30.4035	20.3306	31.4258	19.8297	8.15172	33.383
Lrrc55	-0.297417	0.184795	0.999875	115.703	104.621	83.2589	76.5785	84.6469	104.814	61.1379	58.1818
Gm17709	-0.297393	0.386066	0.999875	18.2125	23.6402	25.7261	32.5289	20.7816	14.164	20.3793	23.845
Pgm5	-0.297293	0.568915	0.999875	11.7846	25.1492	12.1614	5.42149	10.6442	11.3312	16.3034	9.53799
NA	-0.297271	0.133993	0.999875	86.7772	92.0459	77.6459	83.3554	71.4683	50.9905	65.2137	78.2115
Epha10	-0.29721	0.141584	0.999875	262.474	270.102	179.615	161.289	154.595	158.637	167.11	223.189
Olfml2a	-0.296807	0.530471	0.999875	10.7132	12.0716	12.6292	17.6198	15.206	5.66562	12.2276	7.6304
C1qb	-0.296785	0.0947995	0.999875	459.598	542.216	390.101	295.471	400.932	325.773	317.917	317.615
Cd68	-0.296646	0.172129	0.999875	107.132	116.692	90.2751	67.7686	74.0027	82.1514	93.7448	70.5812
Gm5518	-0.296469	0.621791	0.999875	5.35662	9.0537	12.6292	8.13223	6.58928	5.66562	0	12.3994
Klhl40	-0.296165	0.585681	0.999875	17.1412	7.04177	6.54845	19.6529	6.58928	14.164	8.15172	12.3994
Hap1	-0.296071	0.066615	0.999875	1188.1	1831.87	1302.67	1443.47	1435.45	1297.43	925.22	1020.57
Ntn4	-0.295912	0.23103	0.999875	57.8515	57.3401	50.5166	44.7273	50.1799	31.1609	40.7586	41.0134
Trim30d	-0.295433	0.429903	0.999875	57.8515	42.2506	22.9196	21.686	31.9327	31.1609	12.2276	33.383
Dock11	-0.294905	0.156706	0.999875	156.413	191.637	171.195	124.694	158.65	127.476	69.2896	144.024
Lcp1	-0.294843	0.118149	0.999875	139.272	125.746	120.211	97.5868	107.963	110.48	65.2137	95.3799
Dkk3	-0.294729	0.0532245	0.999875	719.93	665.95	938.767	943.339	767.905	529.735	733.655	627.6
Nelfe	-0.294673	0.102476	0.999875	126.416	110.656	102.436	119.273	104.415	99.1483	89.6689	77.2577
Ttc39c	-0.294401	0.0846772	0.999875	168.198	183.589	139.856	140.959	138.375	118.978	101.896	138.301
Gm7061	-0.294134	0.522744	0.999875	14.9985	9.55668	21.9841	15.5868	9.63049	8.49842	12.2276	19.076
Lama4	-0.29386	0.433893	0.999875	27.8544	19.6163	18.7099	16.2645	19.261	11.3312	20.3793	14.307
A230103J11Rik	-0.293768	0.202574	0.999875	66.4221	50.8013	59.4038	53.5372	48.6593	56.6562	40.7586	41.0134
Hpn	-0.293544	0.559079	0.999875	9.64192	17.6044	8.41944	11.5207	9.12362	2.83281	16.3034	11.4456
Pcdhga12	-0.293495	0.141497	0.999875	101.776	74.9445	101.501	92.843	79.5782	87.817	73.3655	63.9046
Map2k3	-0.293319	0.219446	0.999875	72.85	61.8669	55.6618	63.7025	53.2211	36.8265	36.6827	64.8584
Aen	-0.293124	0.162228	0.999875	148.914	186.104	105.243	121.983	104.922	138.808	89.6689	123.04
Sypl2	-0.2929	0.597367	0.999875	4.2853	10.0597	10.7582	10.1653	7.60302	2.83281	12.2276	7.6304
Itgb2	-0.292878	0.197352	0.999875	80.3493	94.5609	64.0813	58.9587	59.8104	65.1546	52.9862	62.9508
4732491K20Rik	-0.292182	0.344049	0.999875	26.7831	39.2327	30.4035	31.1736	25.3434	16.9968	24.4552	33.383
Gm24119	-0.29217	0.605416	0.999875	9.64192	7.04177	8.88718	17.6198	11.1511	2.83281	4.07586	11.4456
Gm20754	-0.292137	0.605107	0.999875	8.57059	6.53878	11.6937	8.13223	6.58928	11.3312	0	8.58419
Tada3	-0.291994	0.0894816	0.999875	113.56	118.704	149.211	133.504	108.47	118.978	89.6689	102.057
Lrp5	-0.291981	0.318646	0.999875	48.2096	58.849	34.1455	42.0165	45.6181	31.1609	48.9103	25.7526
Helz2	-0.291886	0.395901	0.999875	35.3537	26.6581	41.1617	18.2975	22.809	33.9937	24.4552	21.9374
Gm38299	-0.291581	0.52716	0.999875	8.57059	12.0716	27.1293	22.3636	13.6854	14.164	8.15172	19.076
B2m	-0.291365	0.0811531	0.999875	989.903	1018.04	724.539	594.331	699.477	764.858	574.696	669.567
Apcdd1	-0.291364	0.31934	0.999875	42.853	44.2625	28.5325	37.9504	28.3846	31.1609	48.9103	26.7064
Tmem178	-0.291336	0.145562	0.999875	102.847	87.0161	104.775	138.248	92.7568	96.3155	89.6689	77.2577
Gm11767	-0.29131	0.432901	0.999875	24.6405	18.6104	38.823	18.9752	17.7404	25.4953	24.4552	20.0298
Bhlhe40	-0.291221	0.0669086	0.999875	425.316	338.005	283.922	440.496	274.215	337.104	305.689	304.262
Sprn	-0.291184	0.046908	0.999875	329.968	276.641	340.052	391.703	307.669	260.618	232.324	270.879
Fzr1	-0.291092	0.0544037	0.999875	259.26	275.132	212.357	259.554	236.707	178.467	179.338	204.113
Gm3828	-0.290821	0.524905	0.999875	14.9985	11.5686	32.7422	17.6198	15.206	25.4953	20.3793	8.58419
Celf6	-0.29033	0.101215	0.999875	158.556	167.493	148.276	181.62	164.225	141.64	114.124	105.872
Grm2	-0.290313	0.469991	0.999875	26.7831	69.9147	19.6453	50.1488	41.0563	16.9968	28.531	42.921
Aurka	-0.290219	0.561768	0.999875	10.7132	9.0537	13.0969	12.1983	10.6442	14.164	0	8.58419
Ccdc92b	-0.290006	0.109824	0.999875	161.77	130.273	172.131	209.405	137.361	150.139	154.883	119.225
Lrfn3	-0.289207	0.270942	0.999875	69.6361	62.3699	45.8391	58.9587	40.5494	79.3186	44.8345	39.1058
Cxcl14	-0.288863	0.0238524	0.999875	605.298	589.496	567.376	446.595	490.141	441.918	444.269	423.487
Marcksl1	-0.288812	0.243421	0.999875	174.626	221.313	108.049	190.43	170.814	192.631	105.972	96.3337
Ksr1	-0.288642	0.0288066	0.999875	297.828	284.689	291.874	237.868	216.433	232.29	228.248	236.542
E130317F20Rik	-0.288613	0.409425	0.999875	25.7118	20.1193	19.6453	29.1405	19.7678	22.6625	24.4552	14.307
Bsn	-0.288598	0.024681	0.999875	1046.68	796.223	1025.3	1061.26	778.042	733.697	974.13	754.455
Dmp1	-0.288435	0.379037	0.999875	63.2081	42.7536	32.2745	24.3967	34.9739	22.6625	40.7586	32.4292
Gm15539	-0.288419	0.598994	0.999875	8.57059	11.0656	12.1614	6.09917	7.09615	2.83281	8.15172	11.4456
Serpine1	-0.288119	0.49409	0.999875	18.2125	23.1372	13.5646	16.2645	14.1923	2.83281	20.3793	19.076
Oaf	-0.287962	0.191603	0.999875	71.7787	62.8729	73.4362	54.8926	57.7829	50.9905	44.8345	54.3666
Psmg3	-0.287738	0.287686	0.999875	51.4236	40.7416	45.3714	44.0496	43.5906	25.4953	24.4552	41.0134
Mvd	-0.287582	0.182135	0.999875	85.7059	63.3759	66.8877	82.6777	57.2761	70.8202	44.8345	65.8122
Rpl3	-0.287432	0.0169464	0.999875	5383.4	5329.61	4489.43	4583.87	4776.21	4223.72	3370.74	3802.8
Gm14066	-0.287272	0.461385	0.999875	24.6405	25.6521	23.8551	15.5868	18.7541	11.3312	8.15172	26.7064
1700056N10Rik	-0.287209	0.584175	0.999875	12.8559	7.04177	9.82267	15.5868	5.57554	5.66562	16.3034	12.3994
Cby1	-0.287205	0.0801326	0.999875	221.764	196.163	200.195	164.678	188.555	138.808	134.503	156.423
Sla	-0.287151	0.286806	0.999875	36.425	35.7118	43.5004	43.3719	30.9189	39.6593	20.3793	36.2444
Mypop	-0.286986	0.135369	0.999875	110.346	90.034	94.017	85.3884	78.5645	73.653	101.896	66.766
Nme3	-0.286818	0.608454	0.999875	9.64192	5.53282	7.95169	13.5537	8.61675	8.49842	4.07586	6.6766
Gm42517	-0.286754	0.16195	0.999875	113.56	85.0042	140.324	103.008	83.6332	107.647	93.7448	85.8419
Kdm2b	-0.286723	0.0826808	0.999875	122.131	121.219	123.017	126.05	90.7293	93.4827	114.124	111.595
Wsb2	-0.286354	0.0106921	0.976351	1054.18	844.006	922.396	956.893	776.014	776.189	880.386	687.689
Ifitm7	-0.286166	0.581092	0.999875	8.57059	11.5686	7.95169	11.5207	6.58928	5.66562	8.15172	11.4456
Znfx1	-0.286109	0.0554322	0.999875	426.387	312.856	354.084	387.636	287.901	263.451	403.51	281.371
Polr3h	-0.285941	0.142562	0.999875	284.972	205.72	173.066	227.703	227.077	138.808	146.731	189.806
Cacng5	-0.285891	0.153401	0.999875	100.704	123.231	88.8718	109.785	97.8255	96.3155	52.9862	84.8881
Vps37b	-0.285712	0.169252	0.999875	123.202	79.9743	86.0653	80.6446	74.0027	82.1514	65.2137	76.304
Rps6ka2	-0.285544	0.0649324	0.999875	349.252	402.89	435.004	376.116	384.713	246.454	379.055	272.787
Svop	-0.285513	0.0298553	0.999875	639.58	561.329	568.312	648.546	511.936	473.079	619.531	406.319
Ptpro	-0.285259	0.113821	0.999875	203.552	217.792	174.469	209.405	212.884	167.136	134.503	129.717
Cox18	-0.285234	0.157419	0.999875	79.278	88.5251	102.904	82	65.8928	70.8202	61.1379	87.7495
Stc2	-0.285044	0.494229	0.999875	18.2125	16.0955	32.7422	18.2975	25.3434	14.164	12.2276	13.3532
Cnnm2	-0.284741	0.0722604	0.999875	169.269	161.458	198.792	201.273	154.595	161.47	171.186	126.855
Gm14760	-0.284476	0.63993	0.999875	4.2853	8.04773	10.7582	13.5537	12.1648	2.83281	4.07586	6.6766
Asb11	-0.284409	0.324681	0.999875	54.6375	32.6939	56.1296	43.3719	28.3846	42.4921	36.6827	47.69
Nrn1	-0.283982	0.513748	0.999875	593.513	378.746	204.405	388.314	328.45	345.603	146.731	454.962
Pax6	-0.283838	0.0829046	0.999875	140.343	137.817	119.275	126.727	110.497	99.1483	93.7448	114.456
Crybb1	-0.283682	0.446769	0.999875	37.4963	24.6462	29.0003	18.2975	28.3846	16.9968	8.15172	24.7988
Cd93	-0.283655	0.597869	0.999875	5.35662	14.5865	9.82267	10.1653	5.57554	8.49842	16.3034	8.58419
Gm38336	-0.283534	0.328404	0.999875	55.7088	35.7118	58.4683	41.3389	27.3709	50.9905	36.6827	46.7362
Syt6	-0.283339	0.184704	0.999875	515.307	379.249	812.008	513.008	373.562	402.259	643.986	428.256
Rgmb	-0.283299	0.181687	0.999875	140.343	143.853	116.001	174.843	149.526	133.142	101.896	82.0267
Ly6c1	-0.282556	0.341145	0.999875	116.774	112.668	57.0651	46.7603	68.4271	62.3218	89.6689	58.1818
Fcor	-0.282374	0.57821	0.999875	8.57059	9.55668	15.9034	11.5207	13.1786	5.66562	8.15172	7.6304
Pstpip2	-0.282359	0.209707	0.999875	56.7802	62.8729	71.5652	71.157	46.6318	50.9905	48.9103	67.7198
Gm17916	-0.282141	0.576687	0.999875	8.57059	11.0656	14.0324	8.13223	8.10988	14.164	4.07586	8.58419
4932441J04Rik	-0.282091	0.497593	0.999875	19.2838	20.1193	10.7582	18.2975	13.1786	16.9968	20.3793	10.4918
Cacnb3	-0.282042	0.0725981	0.999875	637.438	439.607	610.877	565.19	455.167	371.098	611.379	433.025
Tfcp2l1	-0.282024	0.254765	0.999875	77.1353	85.0042	93.0815	56.9256	80.592	36.8265	77.4413	57.228
Rprm	-0.282003	0.189165	0.999875	136.058	119.71	78.5814	107.752	104.415	93.4827	85.593	74.3964
Gm28307	-0.281481	0.534468	0.999875	11.7846	11.5686	11.6937	16.2645	10.6442	8.49842	8.15172	12.3994
Ly6h	-0.281073	0.045673	0.999875	679.219	770.57	735.297	672.265	754.726	518.404	493.179	548.435
Slc7a4	-0.281032	0.0914004	0.999875	179.982	179.565	242.293	210.083	165.239	147.306	224.172	151.654
Ptger1	-0.280775	0.379534	0.999875	34.2824	30.682	44.9037	24.3967	30.9189	25.4953	16.3034	30.5216
Ryr2	-0.280751	0.0307036	0.999875	1033.83	1075.88	1507.55	1253.04	1084.19	971.653	970.054	976.691
Gm17750	-0.280737	0.646805	0.999875	5.35662	11.0656	10.7582	6.09917	10.1374	0	8.15172	6.6766
Pcdh1	-0.280727	0.0220757	0.999875	550.661	550.264	567.376	561.802	459.222	385.262	595.075	424.441
Zc3h8	-0.280561	0.211529	0.999875	64.2794	67.9027	72.5007	57.6033	53.728	45.3249	40.7586	65.8122
Ppargc1b	-0.280291	0.132091	0.999875	97.4905	86.5131	113.195	103.686	80.592	70.8202	85.593	90.6109
Gm6206	-0.280188	0.569941	0.999875	6.42794	13.0776	15.4356	14.9091	10.1374	5.66562	24.4552	7.6304
C1qa	-0.280065	0.110042	0.999875	522.806	619.172	442.488	322.579	412.083	382.429	411.662	366.259
Ttn	-0.279394	0.460427	0.999875	23.5691	24.6462	14.0324	24.3967	17.7404	14.164	12.2276	21.9374
Cd86	-0.27929	0.395591	0.999875	32.1397	37.2208	38.823	19.6529	28.3846	25.4953	16.3034	29.5678
Pdgfb	-0.279172	0.175632	0.999875	88.9199	71.9266	87.4686	66.4132	59.3035	65.1546	69.2896	68.6736
Vmn2r1	-0.279169	0.615511	0.999875	7.49927	12.5746	6.54845	13.5537	5.06868	5.66562	20.3793	8.58419
Cbarp	-0.278996	0.0155293	0.999875	1087.39	1195.59	965.896	983.323	939.733	960.322	778.489	798.33
Rnasek	-0.278795	0.363821	0.999875	44.9956	29.173	25.2583	35.9174	27.3709	33.9937	24.4552	24.7988
Srm	-0.278791	0.0605516	0.999875	232.477	207.229	238.083	198.562	171.828	201.129	216.021	157.377
Hspg2	-0.278757	0.414019	0.999875	29.9971	41.7476	27.1293	24.3967	22.3022	33.9937	40.7586	17.1684
Irf2	-0.278721	0.0971049	0.999875	163.913	164.979	128.63	132.826	120.128	133.142	97.8206	126.855
Incenp	-0.278658	0.189812	0.999875	77.1353	62.8729	74.8394	71.8347	63.8653	39.6593	73.3655	57.228
Prkar1b	-0.278645	0.0416245	0.999875	2536.9	2318.75	1928.99	2664.66	2207.41	2164.27	1858.59	1556.6
Fibcd1	-0.278629	0.259773	0.999875	49.2809	51.8073	63.1458	67.7686	54.7417	42.4921	65.2137	35.2906
Gal3st3	-0.278336	0.256192	0.999875	76.064	54.8252	85.1298	74.5455	58.2898	53.8233	97.8206	45.7824
Foxred2	-0.278335	0.135653	0.999875	94.2765	100.094	85.5976	113.851	82.1126	73.653	77.4413	85.8419
Olfm4	-0.278306	0.614117	0.999875	6.42794	17.1014	9.82267	8.80992	8.10988	11.3312	0	12.3994
Arl11	-0.278258	0.594961	0.999875	14.9985	18.1074	9.82267	7.45455	10.1374	5.66562	4.07586	16.2146
Rps6kl1	-0.277929	0.0589256	0.999875	214.265	210.75	252.583	228.38	197.678	138.808	216.021	191.714
Nme6	-0.277835	0.348857	0.999875	24.6405	48.7894	36.0165	46.7603	34.467	31.1609	40.7586	27.6602
Samd4b	-0.277295	0.0333142	0.999875	352.466	323.921	292.342	287.339	272.188	277.615	252.703	232.727
Fancd2	-0.277147	0.312942	0.999875	54.6375	33.1969	64.0813	66.4132	44.6044	39.6593	44.8345	48.6438
Csf3r	-0.277137	0.220205	0.999875	86.7772	80.4773	92.146	60.9917	80.592	65.1546	57.062	54.3666
Tbc1d1	-0.277098	0.30399	0.999875	80.3493	107.638	62.678	83.3554	92.7568	59.489	28.531	73.4426
Ramp1	-0.276774	0.0674299	0.999875	346.038	297.766	314.326	275.818	291.956	243.621	289.386	198.39
Catsperd	-0.276563	0.617741	0.999875	12.8559	8.04773	15.9034	6.09917	12.1648	2.83281	8.15172	8.58419
Pex14	-0.276458	0.121627	0.999875	155.342	147.877	116.937	156.545	116.073	107.647	163.034	104.918
Exog	-0.276279	0.132771	0.999875	144.629	115.183	126.292	124.017	114.552	124.644	110.048	78.2115
Lrrfip1	-0.276067	0.0400837	0.999875	512.093	626.214	612.28	502.165	471.387	405.092	411.662	548.435
Bgn	-0.275947	0.415243	0.999875	21.4265	32.6939	22.9196	37.9504	27.8777	19.8297	16.3034	24.7988
Borcs6	-0.275581	0.164326	0.999875	113.56	110.153	82.3234	85.3884	84.14	79.3186	65.2137	83.9343
Mir8094	-0.275564	0.628183	0.999875	8.57059	12.5746	11.2259	4.7438	6.58928	16.9968	4.07586	5.7228
9330162012Rik	-0.275285	0.331508	0.999875	34.2824	38.2267	39.7584	31.8512	34.9739	22.6625	36.6827	24.7988
9630013K17Rik	-0.275228	0.623678	0.999875	16.0699	9.0537	13.5646	4.7438	9.63049	11.3312	0	10.4918
Gstm4	-0.274883	0.309734	0.999875	47.1383	58.3461	37.8875	50.8265	46.125	45.3249	44.8345	27.6602
Midn	-0.274682	0.0839053	0.999875	239.977	205.72	241.825	195.174	180.952	195.464	122.276	208.882
Trhr	-0.274601	0.383273	0.999875	61.0655	66.8968	71.5652	51.5041	70.9615	28.3281	16.3034	69.6274
Grip2	-0.274593	0.132381	0.999875	157.485	161.458	150.614	114.529	102.387	152.972	110.048	125.902
Palmd	-0.274589	0.335583	0.999875	68.5647	99.5907	91.2106	94.1984	89.7156	28.3281	48.9103	104.918
Gm32014	-0.27436	0.628853	0.999875	5.35662	9.0537	9.35493	14.9091	5.06868	8.49842	4.07586	13.3532
Ube2ql1	-0.274038	0.0417792	0.999875	392.105	368.687	319.939	403.223	335.546	339.937	264.931	274.694
Dtnbos	-0.273529	0.64115	0.999875	11.7846	3.52088	16.8389	11.5207	10.6442	5.66562	4.07586	11.4456
Lmbrd2	-0.273468	0.0457802	0.999875	411.388	407.919	466.811	470.314	362.41	359.767	269.007	431.117
Klf12	-0.272632	0.153616	0.999875	74.9927	79.9743	92.6138	86.7438	70.4546	70.8202	65.2137	69.6274
Cfap45	-0.272487	0.347007	0.999875	36.425	35.7118	34.1455	35.9174	33.4533	19.8297	20.3793	33.383
Ap4b1	-0.272413	0.285342	0.999875	38.5677	39.7357	46.7746	50.8265	38.5219	31.1609	40.7586	35.2906
Ace	-0.272289	0.516819	0.999875	127.488	229.36	120.211	277.851	240.762	90.6498	163.034	125.902
Slc1a6	-0.27209	0.362433	0.999875	43.9243	56.8371	34.6132	50.8265	51.1936	45.3249	24.4552	26.7064
Ndst3	-0.271946	0.172333	0.999875	143.557	130.273	112.727	132.826	117.086	90.6498	61.1379	132.578
Sap30bpos	-0.271777	0.624902	0.999875	2.14265	18.1074	20.1131	16.9422	12.1648	2.83281	16.3034	16.2146
Ppp1r12b	-0.27169	0.0250255	0.999875	571.016	541.713	647.361	693.951	519.539	490.076	574.696	465.454
Fam196a	-0.271377	0.380749	0.999875	64.2794	72.9326	34.6132	56.9256	57.7829	67.9874	20.3793	36.2444
Arhgap29	-0.271185	0.193057	0.999875	118.917	157.434	104.307	100.298	112.018	107.647	65.2137	100.149
Rab39	-0.271148	0.547734	0.999875	14.9985	12.0716	18.7099	14.9091	14.1923	0	20.3793	14.307
Fmnl1	-0.271048	0.0549401	0.999875	343.895	288.209	417.23	352.397	275.736	283.281	313.841	297.585
Cdnf	-0.27087	0.504215	0.999875	16.0699	12.0716	18.2421	17.6198	12.6717	16.9968	12.2276	12.3994
Zc3hav1	-0.270822	0.283456	0.999875	77.1353	99.5907	53.3231	65.0579	68.4271	48.1577	48.9103	67.7198
Abca4	-0.270719	0.73394	0.999875	58.9228	113.674	15.9034	109.107	121.648	42.4921	12.2276	64.8584
Tlnrd1	-0.27065	0.134945	0.999875	251.761	150.392	251.18	218.893	178.924	167.136	207.869	173.591
Gda	-0.270532	0.0112354	0.984178	1804.11	1722.21	2264.83	1936.83	1604.24	1603.37	1516.22	1672.96
Soga3	-0.270478	0.0238214	0.999875	371.749	378.243	396.181	414.744	355.821	311.609	338.296	288.047
Ly86	-0.270172	0.155755	0.999875	166.055	158.44	127.227	115.884	119.114	127.476	73.3655	132.578
Rxfp3	-0.269746	0.546651	0.999875	31.0684	25.6521	12.6292	19.6529	27.8777	22.6625	4.07586	11.4456
Ralyl	-0.269509	0.0754941	0.999875	427.458	535.174	427.052	418.132	433.372	427.754	264.931	350.998
Tomm6	-0.269462	0.400124	0.999875	33.211	30.682	29.0003	25.7521	31.4258	25.4953	20.3793	17.1684
Rreb1	-0.269275	0.14093	0.999875	498.166	594.526	894.331	537.405	559.582	407.924	509.482	606.616
Chrna2	-0.268658	0.67577	0.999875	26.7831	10.0597	3.74197	5.42149	8.10988	16.9968	8.15172	5.7228
D930015M05Rik	-0.268504	0.438882	0.999875	25.7118	30.179	29.468	18.2975	19.261	11.3312	36.6827	23.845
Ifi27	-0.268434	0.186749	0.999875	472.454	306.82	239.486	262.942	318.82	229.457	236.4	259.433
Noc4l	-0.268283	0.234142	0.999875	62.1368	55.3282	59.4038	63.7025	43.5906	39.6593	61.1379	58.1818
Sssca1	-0.268084	0.128911	0.999875	117.846	109.65	118.34	113.174	99.8529	96.3155	61.1379	104.918
2700046G09Rik	-0.267995	0.509764	0.999875	17.1412	16.0955	21.5163	14.2314	17.7404	8.49842	12.2276	14.307
Oacyl	-0.267828	0.550654	0.999875	12.8559	10.5626	24.3228	21.686	13.6854	5.66562	16.3034	20.0298
Chil1	-0.267773	0.211227	0.999875	133.915	134.8	91.6783	93.5207	108.47	65.1546	89.6689	99.1951
A930033H14Rik	-0.26769	0.528314	0.999875	16.0699	15.5925	12.1614	16.2645	9.12362	14.164	20.3793	12.3994
D630023F18Rik	-0.267632	0.481938	0.999875	29.9971	24.6462	17.3066	25.0744	25.8503	19.8297	4.07586	20.0298
Gm26876	-0.267573	0.603179	0.999875	9.64192	10.5626	8.88718	11.5207	11.1511	8.49842	4.07586	6.6766
Filip1	-0.267494	0.111296	0.999875	239.977	193.649	238.083	225.669	164.225	209.628	252.703	152.608
Junos	-0.267125	0.552908	0.999875	7.49927	14.5865	14.9679	18.9752	12.1648	11.3312	8.15172	13.3532
A730060N03Rik	-0.267095	0.421563	0.999875	24.6405	21.6283	34.1455	23.719	20.7816	28.3281	20.3793	20.0298
Syce2	-0.266874	0.460403	0.999875	20.3552	19.1134	21.5163	21.0083	20.2747	11.3312	16.3034	16.2146
Polr3g	-0.266161	0.241152	0.999875	65.3508	64.3819	63.6135	74.5455	56.2623	45.3249	36.6827	69.6274
Hmox1	-0.265897	0.431253	0.999875	36.425	71.9266	35.081	26.4298	35.4807	28.3281	36.6827	40.0596
Abr	-0.265852	0.00830963	0.931647	1867.32	1984.27	1616.06	1801.29	1653.4	1447.56	1512.14	1419.25
Pcdhgb6	-0.265665	0.216512	0.999875	82.4919	80.9803	89.3396	100.298	84.14	56.6562	105.972	55.3204
Slc23a1	-0.265526	0.631424	0.999875	8.57059	8.55072	8.41944	10.843	9.12362	2.83281	4.07586	9.53799
Srgn	-0.265391	0.409982	0.999875	34.2824	49.7953	36.0165	23.719	24.3297	45.3249	24.4552	30.5216
H2-T23	-0.265277	0.190245	0.999875	107.132	89.531	71.5652	92.843	74.5096	65.1546	93.7448	70.5812
Lrrk1	-0.265275	0.479601	0.999875	21.4265	28.1671	21.5163	14.2314	20.2747	19.8297	12.2276	16.2146
Spa17	-0.265025	0.409734	0.999875	43.9243	36.2148	28.5325	35.9174	37.0013	16.9968	16.3034	35.2906
Insrr	-0.264911	0.579505	0.999875	7.49927	12.0716	20.1131	12.876	11.658	5.66562	12.2276	13.3532
Unc13b	-0.264892	0.0780207	0.999875	342.824	290.221	326.019	344.942	304.627	218.126	211.945	311.892
NA	-0.264848	0.2634	0.999875	84.6346	66.3938	72.5007	73.8678	78.5645	39.6593	44.8345	63.9046
Parp10	-0.264826	0.549914	0.999875	24.6405	18.6104	10.7582	10.843	12.6717	11.3312	12.2276	15.2608
Mpeg1	-0.264752	0.07385	0.999875	545.304	604.586	518.263	382.215	444.016	410.757	379.055	456.87
Hgh1	-0.264715	0.308075	0.999875	58.9228	42.2506	53.3231	48.7934	43.0838	65.1546	28.531	33.383
Malsu1	-0.264707	0.243172	0.999875	62.1368	60.358	55.1941	67.0909	55.7554	39.6593	40.7586	55.3204
Gm5905	-0.264598	0.669176	0.999875	9.64192	10.5626	7.95169	5.42149	11.1511	5.66562	0	5.7228
Hipk4	-0.264451	0.465888	0.999875	460.669	256.521	645.958	536.727	350.752	280.448	611.379	348.137
Nr2e1	-0.264353	0.183882	0.999875	79.278	88.0221	84.1944	75.9008	70.9615	48.1577	69.2896	76.304
Anapc10	-0.264236	0.181169	0.999875	100.704	132.788	88.8718	124.694	95.2911	82.1514	81.5172	103.964
Ier5	-0.264204	0.206667	0.999875	212.122	116.189	216.099	178.231	133.306	152.972	195.641	135.44
Gpatch3	-0.263936	0.404034	0.999875	34.2824	25.6521	35.081	25.0744	24.3297	22.6625	16.3034	30.5216
Unc13a	-0.263632	0.062748	0.999875	1568.42	1408.86	2202.62	1458.38	1372.6	1317.26	1516.22	1336.27
Pgam5	-0.263201	0.0891114	0.999875	147.843	153.41	133.308	152.479	124.689	121.811	138.579	111.595
Trib2	-0.26313	0.0494053	0.999875	264.617	250.989	232.002	264.298	200.72	237.956	232.324	191.714
Trp53rka	-0.262565	0.213088	0.999875	79.278	84.5012	69.6942	82	72.4821	45.3249	57.062	73.4426
Dap	-0.262513	0.375635	0.999875	40.7103	37.7237	26.1938	38.6281	27.8777	42.4921	28.531	24.7988
Sac3d1	-0.262448	0.350775	0.999875	37.4963	33.6999	36.0165	31.1736	26.3571	33.9937	20.3793	32.4292
Ass1	-0.262361	0.109043	0.999875	314.969	284.186	259.599	378.149	273.202	220.959	330.145	219.374
Rhbdd3	-0.262113	0.160994	0.999875	92.1339	111.662	100.098	82.6777	80.592	76.4858	89.6689	80.1191
Akt2	-0.261923	0.0465475	0.999875	726.358	606.598	857.847	717.67	626.489	507.073	672.517	619.016
Gm43672	-0.261785	0.427399	0.999875	28.9257	19.1134	32.2745	25.7521	21.7953	22.6625	24.4552	20.9836
Dgki	-0.261762	0.115074	0.999875	324.611	261.551	431.73	363.24	293.476	235.123	330.145	295.678
B4galnt1	-0.261671	0.103715	0.999875	367.464	305.311	434.536	357.818	283.339	274.782	423.889	270.879
Pipox	-0.26154	0.367062	0.999875	46.0669	30.682	43.5004	46.7603	33.4533	22.6625	28.531	45.7824
Xylt1	-0.261372	0.0996029	0.999875	193.91	232.881	219.841	242.612	173.856	235.123	207.869	152.608
Zfp668	-0.261269	0.184	0.999875	100.704	87.5191	96.8235	127.405	82.6194	73.653	81.5172	99.1951
Zfp36	-0.261191	0.562826	0.999875	14.9985	31.185	11.6937	15.5868	17.2335	19.8297	4.07586	16.2146
Trim30a	-0.260624	0.357606	0.999875	56.7802	45.7715	40.6939	34.562	29.3983	28.3281	40.7586	48.6438
Slc39a10	-0.260592	0.110597	0.999875	1371.29	1049.22	1874.73	1596.63	1398.95	1266.27	1002.66	1230.4
Rpl19	-0.260541	0.0678586	0.999875	1769.83	1797.16	1628.23	1458.38	1745.65	1237.94	1063.8	1456.45
Mn1	-0.260407	0.145364	0.999875	241.048	168.499	253.051	203.984	148.005	167.136	224.172	198.39
Steap3	-0.260292	0.443247	0.999875	37.4963	34.2029	22.4518	25.0744	31.9327	25.4953	16.3034	19.076
Rab32	-0.260281	0.555013	0.999875	9.64192	18.1074	16.3711	11.5207	12.6717	14.164	12.2276	9.53799
Panx1	-0.260086	0.160753	0.999875	100.704	111.159	93.0815	124.017	97.8255	93.4827	89.6689	77.2577
Eif4ebp3	-0.260085	0.554545	0.999875	16.0699	13.0776	12.6292	12.1983	12.1648	8.49842	8.15172	12.3994
Susd4	-0.259919	0.0143825	0.999875	477.81	502.48	483.65	477.769	421.714	436.252	399.434	370.074
Chmp1a	-0.259905	0.0356972	0.999875	521.735	479.846	550.538	488.612	498.251	382.429	395.358	401.55
Lasp1	-0.259878	0.0411611	0.999875	544.233	532.156	457.456	490.645	483.552	413.59	427.965	358.629
Lgals9	-0.259768	0.346251	0.999875	53.5662	38.2267	35.081	39.9835	34.467	42.4921	40.7586	26.7064
Snx7	-0.259677	0.126251	0.999875	114.632	127.758	149.211	134.86	107.456	133.142	85.593	112.548
Kti12	-0.259658	0.337396	0.999875	38.5677	38.2267	35.5487	33.8843	31.4258	36.8265	28.531	26.7064
Met	-0.259608	0.455885	0.999875	41.7816	38.7297	33.21	27.7851	39.0288	8.49842	20.3793	36.2444
Myo18b	-0.259563	0.575479	0.999875	14.9985	11.5686	14.5001	18.2975	18.2472	11.3312	12.2276	5.7228
Elk3	-0.259525	0.428822	0.999875	51.4236	44.7655	40.2262	49.4711	23.3159	53.8233	73.3655	26.7064
NA	-0.259443	0.379978	0.999875	34.2824	32.6939	30.8713	26.4298	22.809	28.3281	32.6069	25.7526
Cpped1	-0.258855	0.0589016	0.999875	288.186	257.527	276.438	297.504	229.611	212.461	305.689	211.743
Vipr1	-0.258642	0.250054	0.999875	119.988	69.9147	126.759	96.9091	86.6744	65.1546	93.7448	95.3799
Plxna1	-0.258473	0.125939	0.999875	265.688	357.118	268.486	335.455	291.956	305.943	171.186	239.404
Fblim1	-0.258324	0.561832	0.999875	12.8559	20.6223	19.6453	15.5868	15.206	2.83281	36.6827	10.4918
Morc2b	-0.2578	0.47586	0.999875	32.1397	22.1313	29.0003	16.9422	19.261	33.9937	20.3793	15.2608
Zfp687	-0.257742	0.114164	0.999875	216.407	232.881	161.373	224.992	173.349	184.133	142.655	186.945
Dbpht2	-0.257697	0.073476	0.999875	412.46	363.154	551.005	417.455	379.137	356.934	358.676	361.49
Wdr34	-0.257248	0.0962458	0.999875	209.98	177.05	196.921	175.521	145.978	167.136	203.793	143.07
Noa1	-0.256998	0.237833	0.999875	73.9214	76.4535	63.6135	79.967	63.8653	76.4858	69.2896	45.7824
Cyth4	-0.256965	0.262401	0.999875	91.0625	135.805	106.178	73.1901	102.894	73.653	73.3655	81.0729
Ccdc33	-0.256941	0.592852	0.999875	22.4978	11.0656	19.1776	21.0083	16.7266	0	12.2276	24.7988
C2cd4c	-0.256886	0.362369	0.999875	34.2824	38.7297	42.5649	53.5372	44.0975	25.4953	32.6069	32.4292
5730559C18Rik	-0.256556	0.56957	0.999875	19.2838	12.5746	15.9034	10.1653	15.206	8.49842	8.15172	11.4456
Tnni3	-0.256498	0.634949	0.999875	18.2125	12.5746	4.20972	12.876	10.1374	5.66562	16.3034	8.58419
Pnma1	-0.256395	0.413634	0.999875	25.7118	32.1909	25.2583	31.1736	27.3709	16.9968	32.6069	20.0298
Lhx6	-0.25617	0.299393	0.999875	127.488	135.805	78.5814	86.7438	87.1812	133.142	81.5172	64.8584
Hyi	-0.256162	0.321468	0.999875	97.4905	92.0459	92.146	58.281	88.7019	59.489	32.6069	82.0267
Cftr	-0.256159	0.469368	0.999875	20.3552	20.6223	27.597	27.1074	15.206	25.4953	12.2276	26.7064
Slc12a8	-0.256095	0.584891	0.999875	9.64192	12.5746	13.5646	12.876	9.12362	2.83281	16.3034	13.3532
Lyl1	-0.256002	0.560498	0.999875	13.9272	16.5984	14.9679	9.48761	10.6442	14.164	16.3034	9.53799
Erg	-0.255754	0.605392	0.999875	16.0699	21.6283	12.1614	11.5207	6.58928	31.1609	8.15172	11.4456
Prokr2	-0.255596	0.433699	0.999875	23.5691	34.2029	35.081	47.438	38.5219	33.9937	20.3793	20.9836
Fkbp10	-0.255363	0.437237	0.999875	29.9971	53.3162	27.597	32.5289	37.5082	25.4953	20.3793	29.5678
Wdr25	-0.255327	0.332489	0.999875	62.1368	49.7953	44.4359	75.2232	40.5494	53.8233	69.2896	42.921
Pcsk1	-0.255138	0.129685	0.999875	207.837	200.69	179.615	193.141	196.158	178.467	101.896	151.654
NA	-0.255134	0.363167	0.999875	95.3478	96.0698	59.8715	63.7025	86.1675	25.4953	77.4413	64.8584
Ranbp2	-0.255072	0.037618	0.999875	1769.83	1726.74	2198.41	1747.07	1593.09	1467.39	1328.73	1813.17
Sh3d21	-0.255047	0.608623	0.999875	11.7846	12.0716	10.2904	8.80992	9.12362	14.164	12.2276	4.769
Htr2a	-0.254992	0.18155	0.999875	190.696	145.865	128.63	117.917	115.059	152.972	101.896	117.317
9430037G07Rik	-0.254874	0.41813	0.999875	32.1397	24.6462	29.468	23.719	19.7678	25.4953	24.4552	24.7988
Itpka	-0.254511	0.199521	0.999875	494.952	298.772	572.989	489.967	343.656	351.268	546.165	339.553
Ptges	-0.25442	0.4778	0.999875	31.0684	22.6342	18.2421	19.6529	18.2472	28.3281	12.2276	17.1684
Cotl1	-0.254381	0.133309	0.999875	302.113	374.22	253.519	265.653	293.476	277.615	203.793	215.559
Cabp1	-0.254074	0.123881	0.999875	482.096	300.281	385.423	353.074	270.667	288.946	387.207	340.506
Il1rl2	-0.253829	0.608594	0.999875	8.57059	16.0955	21.0486	6.77686	11.658	11.3312	12.2276	10.4918
Sptbn2	-0.253822	0.0870346	0.999875	3823.56	2761.38	4418.8	3849.26	3254.09	2696.83	3749.79	2771.74
Col4a6	-0.253749	0.632006	0.999875	9.64192	14.5865	7.48394	7.45455	9.12362	5.66562	8.15172	8.58419
Slc13a3	-0.253634	0.290271	0.999875	48.2096	49.7953	46.7746	49.4711	43.5906	48.1577	28.531	38.152
NA	-0.253591	0.227689	0.999875	158.556	153.913	113.195	107.074	137.361	76.4858	101.896	112.548
Apaf1	-0.2535	0.179477	0.999875	108.204	104.118	137.05	117.917	90.2225	73.653	134.503	104.918
Gxylt2	-0.253264	0.626838	0.999875	17.1412	9.55668	8.88718	10.1653	12.6717	5.66562	4.07586	9.53799
Dapk3	-0.252776	0.110032	0.999875	196.052	154.919	171.663	172.132	153.074	172.801	105.972	138.301
Zfp575	-0.25275	0.458637	0.999875	29.9971	18.6104	23.3873	25.0744	18.2472	16.9968	20.3793	23.845
Peg10	-0.25256	0.454938	0.999875	474.597	759.505	427.988	778.661	729.89	589.224	338.296	383.427
Liph	-0.252535	0.642367	0.999875	9.64192	9.55668	15.9034	9.48761	14.1923	8.49842	0	8.58419
4930539J05Rik	-0.252185	0.534103	0.999875	17.1412	16.0955	21.0486	14.2314	17.2335	11.3312	8.15172	15.2608
St6galnac6	-0.252043	0.0183338	0.999875	633.152	545.234	552.876	564.513	492.675	518.404	464.648	450.193
Ddx49	-0.252019	0.0907723	0.999875	204.623	192.14	175.405	178.231	146.485	141.64	150.807	182.176
Gm17080	-0.251812	0.631561	0.999875	7.49927	8.55072	11.2259	10.843	5.06868	11.3312	12.2276	8.58419
Efcab5	-0.251726	0.405842	0.999875	43.9243	32.1909	47.7101	28.4628	26.3571	48.1577	24.4552	32.4292
Gpr161	-0.251708	0.296971	0.999875	64.2794	93.5549	83.2589	64.3802	81.0988	62.3218	36.6827	61.997
Rtn4r	-0.251572	0.460024	0.999875	27.8544	28.1671	22.9196	46.0827	32.9464	22.6625	24.4552	20.9836
Inafm2	-0.251528	0.0649449	0.999875	234.62	234.39	272.696	243.289	223.022	189.798	179.338	215.559
Stard5	-0.251389	0.377002	0.999875	56.7802	84.5012	142.195	82.6777	104.415	50.9905	73.3655	71.535
D730003I15Rik	-0.251348	0.410749	0.999875	36.425	32.1909	29.9358	25.7521	25.3434	31.1609	12.2276	29.5678
Med7	-0.251144	0.163069	0.999875	106.061	108.141	113.195	116.562	90.2225	121.811	57.062	97.2875
Fbxo5	-0.25087	0.541629	0.999875	12.8559	19.1134	17.7744	12.876	13.1786	8.49842	20.3793	13.3532
Tbc1d22b	-0.250802	0.0625015	0.999875	221.764	210.75	198.324	197.884	166.253	184.133	163.034	181.222
Rab3d	-0.250753	0.562364	0.999875	13.9272	16.5984	30.8713	33.8843	30.4121	22.6625	8.15172	13.3532
Stk32b	-0.250746	0.591249	0.999875	27.8544	41.7476	13.5646	17.6198	33.4533	25.4953	12.2276	9.53799
Nrbf2	-0.250629	0.231683	0.999875	76.064	74.9445	70.162	86.7438	67.9203	76.4858	73.3655	49.5976
Zfp64	-0.250263	0.208794	0.999875	74.9927	81.9863	73.9039	79.967	69.4409	53.8233	85.593	58.1818
Csmd2	-0.250228	0.072371	0.999875	267.831	288.209	368.116	293.438	256.982	263.451	269.007	245.126
Gm17201	-0.250157	0.47531	0.999875	46.0669	26.1551	28.5325	22.3636	25.8503	16.9968	16.3034	34.3368
Gm14824	-0.250071	0.698201	0.999875	8.57059	13.0776	8.41944	4.7438	6.58928	0	4.07586	14.307
Dtnb	-0.249735	0.0886715	0.999875	355.68	303.299	430.794	407.289	324.395	274.782	374.979	295.678
Zfp977	-0.24967	0.656633	0.999875	6.42794	9.55668	18.2421	14.9091	12.6717	5.66562	0	16.2146
Emid1	-0.249532	0.452174	0.999875	19.2838	29.173	35.081	24.3967	24.3297	16.9968	32.6069	20.9836
Kcnt2	-0.249507	0.258289	0.999875	160.699	138.823	205.341	216.182	194.13	99.1483	110.048	176.453
Rab3b	-0.249474	0.155069	0.999875	278.544	242.941	239.486	246.678	245.831	274.782	171.186	152.608
Dqx1	-0.249307	0.660307	0.999875	4.2853	13.0776	10.2904	11.5207	10.6442	8.49842	0	9.53799
Mpg	-0.249212	0.226434	0.999875	73.9214	84.5012	89.3396	64.3802	66.3997	65.1546	77.4413	61.0432
Bcl11a	-0.249082	0.0910208	0.999875	294.614	266.078	380.746	313.091	252.42	305.943	260.855	248.942
Cdyl2	-0.24894	0.442539	0.999875	29.9971	24.6462	29.468	35.9174	31.9327	28.3281	20.3793	17.1684
Gpr45	-0.248654	0.254765	0.999875	76.064	73.4356	65.9522	60.9917	61.8379	76.4858	48.9103	46.7362
Dnal4	-0.248463	0.16642	0.999875	196.052	158.943	173.066	132.826	149.019	96.3155	171.186	137.347
Fam206a	-0.248407	0.123839	0.999875	164.984	173.026	196.921	170.099	171.321	116.145	171.186	132.578
Aco1	-0.248325	0.0922517	0.999875	245.333	237.408	192.712	246	214.912	189.798	175.262	181.222
Atm	-0.248014	0.0768157	0.999875	209.98	202.702	198.792	214.149	185.514	135.975	179.338	180.268
Csk	-0.247908	0.218455	0.999875	159.627	147.877	94.9525	159.934	122.662	133.142	118.2	101.103
Rnf208	-0.24771	0.145407	0.999875	337.467	279.659	222.647	255.488	234.173	260.618	264.931	177.407
Pgd	-0.247591	0.125763	0.999875	269.974	278.15	201.131	228.38	220.994	155.804	203.793	225.097
Rxfp1	-0.247546	0.292071	0.999875	68.5647	50.8013	70.6297	88.7769	55.2486	65.1546	48.9103	62.9508
Mybbp1a	-0.247497	0.0303992	0.999875	339.61	353.597	379.81	332.744	295.504	303.11	289.386	297.585
Mgll	-0.247493	0.0444667	0.999875	761.711	624.202	790.491	656.678	677.175	552.398	558.393	574.187
Gm16091	-0.247426	0.670346	0.999875	4.2853	10.0597	13.0969	6.77686	7.60302	2.83281	8.15172	9.53799
Nfil3	-0.247337	0.475671	0.999875	40.7103	45.2685	43.5004	42.0165	46.125	16.9968	73.3655	17.1684
NA	-0.247169	0.687511	0.999875	4.2853	8.55072	11.2259	8.80992	3.04121	5.66562	8.15172	12.3994
Tesc	-0.247001	0.245209	0.999875	262.474	155.925	298.422	267.686	193.117	175.634	301.614	178.36
Begain	-0.246911	0.0452969	0.999875	601.013	573.904	608.538	457.438	459.222	501.407	440.193	484.53
Fhit	-0.246581	0.516158	0.999875	18.2125	24.1432	13.5646	25.7521	18.2472	14.164	20.3793	16.2146
Sult2b1	-0.246521	0.352933	0.999875	35.3537	50.2983	66.8877	69.8017	44.6044	53.8233	57.062	41.9672
NA	-0.246519	0.441272	0.999875	42.853	30.179	28.5325	23.0413	30.4121	25.4953	20.3793	22.8912
Axl	-0.246136	0.139394	0.999875	404.96	383.776	253.051	295.471	296.011	311.609	264.931	251.803
Mrpl46	-0.246043	0.173021	0.999875	154.271	160.452	153.889	128.76	153.581	110.48	89.6689	124.948
Gm12758	-0.245943	0.588987	0.999875	17.1412	15.5925	12.1614	12.1983	7.09615	11.3312	12.2276	18.1222
A930003O13Rik	-0.245818	0.597841	0.999875	23.5691	16.5984	14.5001	11.5207	13.1786	31.1609	8.15172	6.6766
Gm15635	-0.245809	0.583702	0.999875	11.7846	11.0656	12.6292	14.2314	9.12362	11.3312	16.3034	9.53799
Uchl3	-0.245783	0.129276	0.999875	242.119	184.092	182.889	170.777	162.198	141.64	154.883	184.083
Gm9839	-0.245675	0.66143	0.999875	3.21397	10.5626	22.9196	14.2314	11.658	5.66562	8.15172	15.2608
Rimbp2	-0.245572	0.0722702	0.999875	704.931	649.854	912.573	717.67	604.693	563.729	770.337	603.755
Hist1h4k	-0.245508	0.639586	0.999875	11.7846	13.5805	21.0486	16.2645	22.809	5.66562	0	14.307
Arhgap30	-0.24548	0.314773	0.999875	65.3508	52.8132	48.6456	45.405	43.5906	59.489	40.7586	38.152
Ppih	-0.245298	0.216723	0.999875	92.1339	81.9863	76.2427	77.2562	77.5508	70.8202	61.1379	60.0894
1700086L19Rik	-0.245292	0.220834	0.999875	140.343	132.788	230.599	151.802	125.703	135.975	158.959	143.07
Mnt	-0.245101	0.105963	0.999875	173.554	162.967	168.856	193.818	152.567	127.476	183.414	135.44
Wasf2	-0.244973	0.191576	0.999875	170.341	151.901	108.985	149.091	139.895	107.647	105.972	119.225
Mypn	-0.244893	0.648054	0.999875	13.9272	7.54475	8.41944	8.13223	6.58928	8.49842	4.07586	10.4918
Olfm1	-0.24476	0.0647409	0.999875	1302.73	1074.88	914.912	1227.29	1015.26	1028.31	965.979	807.868
Gm26660	-0.244718	0.625316	0.999875	14.9985	14.5865	11.2259	8.80992	9.12362	0	16.3034	15.2608
Pcdhb16	-0.244686	0.207207	0.999875	97.4905	82.4893	106.178	87.4215	86.1675	59.489	81.5172	80.1191
Washc3	-0.244642	0.181453	0.999875	100.704	100.597	102.904	109.107	100.867	67.9874	81.5172	84.8881
Shisa2	-0.244585	0.392791	0.999875	49.2809	33.1969	62.678	46.0827	35.9876	48.1577	57.062	32.4292
Tbx3	-0.244555	0.651954	0.999875	7.49927	8.55072	7.48394	10.1653	7.09615	8.49842	4.07586	7.6304
Fam189a1	-0.244537	0.106234	0.999875	214.265	192.643	202.066	187.041	173.856	167.136	211.945	137.347
Pde1c	-0.244507	0.137024	0.999875	328.896	367.178	497.682	309.025	339.095	345.603	264.931	311.892
Ctsz	-0.244439	0.13239	0.999875	344.966	407.919	335.842	298.182	346.698	266.284	338.296	225.097
Pou3f4	-0.244389	0.219853	0.999875	133.915	100.597	172.131	123.339	112.018	110.48	134.503	100.149
Gm43848	-0.24437	0.432183	0.999875	31.0684	22.6342	28.5325	27.7851	22.3022	22.6625	28.531	21.9374
B4galt1	-0.244345	0.437653	0.999875	29.9971	60.861	40.6939	48.7934	48.1524	31.1609	16.3034	43.8748
Cryz	-0.244173	0.240993	0.999875	171.412	183.589	116.469	128.76	147.499	150.139	81.5172	113.502
Plpp6	-0.243893	0.0557299	0.999875	227.121	218.798	227.325	233.124	185.007	203.962	195.641	188.852
Trappc9	-0.243872	0.143325	0.999875	284.972	288.209	194.115	288.017	213.898	243.621	256.779	192.667
Actr3b	-0.243795	0.0747669	0.999875	614.94	445.14	594.038	635.67	466.825	458.915	562.469	460.685
Wbp11	-0.243774	0.0534709	0.999875	354.608	347.058	328.358	411.355	329.464	294.612	289.386	290.909
NA	-0.243729	0.262586	0.999875	118.917	111.662	84.1944	76.5785	83.1263	99.1483	48.9103	87.7495
Mylpf	-0.243395	0.6358	0.999875	10.7132	10.0597	8.41944	11.5207	8.61675	2.83281	20.3793	6.6766
Gm26890	-0.243365	0.48516	0.999875	16.0699	25.1492	31.339	21.686	18.7541	22.6625	20.3793	20.9836
Pantr2	-0.24294	0.379438	0.999875	42.853	35.2088	46.3069	32.5289	31.9327	39.6593	40.7586	27.6602
Cdc42ep3	-0.242925	0.211157	0.999875	138.201	97.5788	135.646	115.884	99.8529	79.3186	146.731	97.2875
Ccdc3	-0.242869	0.544931	0.999875	23.5691	18.6104	19.6453	25.0744	22.809	16.9968	0	21.9374
Cobl	-0.24279	0.12733	0.999875	339.61	271.108	381.213	412.711	312.231	288.946	350.524	248.942
Dgkd	-0.242765	0.0250326	0.999875	537.805	512.037	571.586	486.579	466.825	456.082	411.662	434.933
Vkorc1	-0.242678	0.29298	0.999875	57.8515	67.9027	59.4038	54.8926	51.7005	42.4921	36.6827	61.0432
Nln	-0.242309	0.0700462	0.999875	239.977	284.186	242.293	278.529	207.309	237.956	203.793	235.588
Pdzd9	-0.242136	0.660219	0.999875	8.57059	6.53878	9.35493	11.5207	7.60302	14.164	8.15172	3.8152
Klhl6	-0.242135	0.5657	0.999875	18.2125	31.185	18.7099	10.843	14.1923	14.164	16.3034	21.9374
Zfp27	-0.242077	0.193488	0.999875	203.552	138.32	158.098	160.612	164.225	116.145	101.896	147.839
C1ql3	-0.241867	0.387007	0.999875	71.7787	58.849	63.6135	117.917	75.0164	45.3249	44.8345	82.9805
Btg3	-0.241813	0.330703	0.999875	49.2809	77.4594	73.9039	67.7686	43.5906	56.6562	89.6689	57.228
Fam19a1	-0.241575	0.340167	0.999875	83.5633	89.028	72.5007	60.9917	61.331	82.1514	20.3793	81.0729
Gm10699	-0.241456	0.19511	0.999875	81.4206	86.5131	87.4686	92.1653	67.4134	84.9842	77.4413	73.4426
Gm6277	-0.241281	0.503227	0.999875	32.1397	38.2267	25.2583	27.1074	35.9876	16.9968	8.15172	28.614
Gm37928	-0.241243	0.174559	0.999875	99.6331	127.255	125.824	124.017	96.3049	104.814	77.4413	117.317
Mindy4	-0.241197	0.342209	0.999875	43.9243	54.8252	65.4845	48.7934	51.7005	28.3281	44.8345	48.6438
Pisd-ps2	-0.241146	0.412563	0.999875	28.9257	33.1969	40.6939	28.4628	26.864	33.9937	20.3793	29.5678
Scap	-0.241143	0.0510646	0.999875	354.608	340.52	352.213	357.818	319.834	303.11	326.069	250.849
Nxph2	-0.240986	0.577652	0.999875	10.7132	14.0835	24.3228	16.9422	16.2198	11.3312	8.15172	16.2146
Gm4221	-0.240827	0.631022	0.999875	8.57059	16.5984	13.0969	12.1983	8.10988	14.164	0	17.1684
Sipa1	-0.240784	0.230256	0.999875	86.7772	79.4714	84.6621	67.7686	69.9477	79.3186	65.2137	58.1818
Nme1	-0.240782	0.0561083	0.999875	518.521	489.403	446.23	504.198	465.811	405.092	317.917	427.302
Tomm5	-0.240776	0.141832	0.999875	201.409	190.631	164.647	172.132	164.732	141.64	105.972	175.499
Uspl1	-0.240758	0.0957778	0.999875	359.965	338.508	349.407	338.165	286.38	212.461	293.462	360.536
Alms1	-0.240709	0.189349	0.999875	128.559	131.782	138.921	121.306	123.676	79.3186	85.593	127.809
Wfs1	-0.240503	0.493149	0.999875	767.068	861.107	369.52	559.769	488.62	504.24	811.096	371.982
Dgkh	-0.240369	0.15505	0.999875	184.268	128.261	180.55	151.124	140.909	133.142	130.427	134.486
Tor2a	-0.240155	0.187636	0.999875	118.917	104.621	123.017	120.628	103.908	62.3218	110.048	109.687
2900072N19Rik	-0.239681	0.493478	0.999875	28.9257	20.6223	18.7099	23.0413	15.7129	25.4953	20.3793	19.076
Pcdhb6	-0.239577	0.359824	0.999875	72.85	70.9206	145.937	76.5785	78.0576	82.1514	93.7448	65.8122
6330403K07Rik	-0.239566	0.0999182	0.999875	1403.43	1767.99	1208.19	1661.69	1515.03	1348.42	1039.34	1189.39
Rasal3	-0.23949	0.469178	0.999875	23.5691	37.7237	36.0165	27.7851	32.9464	31.1609	8.15172	25.7526
Amigo3	-0.23934	0.49476	0.999875	17.1412	23.6402	36.952	27.1074	20.7816	22.6625	16.3034	27.6602
Havcr2	-0.239291	0.33561	0.999875	54.6375	49.7953	48.1779	44.0496	36.4945	39.6593	32.6069	52.459
Tor4a	-0.239219	0.56646	0.999875	16.0699	20.6223	20.1131	12.1983	19.7678	8.49842	16.3034	11.4456
Mmp16	-0.239175	0.147502	0.999875	173.554	139.326	180.55	195.174	134.827	175.634	134.503	144.024
Aldh1a2	-0.239088	0.605511	0.999875	14.9985	22.6342	7.95169	17.6198	11.1511	14.164	24.4552	10.4918
Ccdc6	-0.239014	0.0575658	0.999875	387.819	362.148	315.261	323.934	286.38	331.439	285.31	279.463
Kif22	-0.238876	0.412877	0.999875	34.2824	32.1909	44.4359	28.4628	29.3983	25.4953	40.7586	27.6602
Nim1k	-0.238857	0.107972	0.999875	157.485	180.571	157.631	176.198	153.581	133.142	134.503	139.255
Phactr1	-0.238646	0.165456	0.999875	3433.59	2446.51	4212.06	3208.84	2697.04	2515.53	3778.32	2312.01
Foxo6	-0.238617	0.414384	0.999875	43.9243	46.7774	66.42	62.3471	44.0975	56.6562	77.4413	26.7064
Srrd	-0.238507	0.282996	0.999875	62.1368	52.3103	62.2103	55.5703	51.7005	45.3249	44.8345	49.5976
Traf3	-0.238481	0.0848744	0.999875	294.614	326.436	286.729	286.661	266.106	220.959	203.793	290.909
Kdr	-0.238029	0.378456	0.999875	35.3537	40.7416	33.21	37.9504	30.9189	36.8265	24.4552	31.4754
Lysmd1	-0.238018	0.387701	0.999875	47.1383	34.7058	37.8875	36.595	34.9739	42.4921	32.6069	24.7988
Asb2	-0.237901	0.598513	0.999875	23.5691	8.55072	22.9196	15.5868	11.658	14.164	28.531	12.3994
Arx	-0.237869	0.240097	0.999875	98.5618	97.0758	94.017	94.1984	70.9615	96.3155	118.2	65.8122
Tmco5	-0.237854	0.679965	0.999875	7.49927	9.55668	12.6292	5.42149	10.6442	8.49842	4.07586	4.769
Pde8b	-0.237768	0.0715448	0.999875	878.486	690.596	905.089	775.273	679.203	671.375	843.703	591.356
2410015M20Rik	-0.237538	0.074383	0.999875	417.816	426.53	385.891	344.265	375.589	317.274	269.007	341.46
Lrrc73	-0.237298	0.212992	0.999875	104.99	86.0101	105.711	82.6777	77.5508	96.3155	77.4413	75.3502
Nuak2	-0.237191	0.68693	0.999875	13.9272	13.0776	6.0807	6.77686	12.6717	5.66562	12.2276	2.8614
AI429214	-0.237064	0.592488	0.999875	20.3552	14.0835	28.0648	27.7851	29.3983	22.6625	0	15.2608
Slc1a3	-0.236995	0.0933307	0.999875	4090.31	5258.19	3421.1	3935.32	4234.37	3558.01	3097.65	3261.04
Adamtsl2	-0.236942	0.572383	0.999875	23.5691	15.5925	17.3066	16.2645	12.6717	14.164	4.07586	23.845
Chmp6	-0.236619	0.240799	0.999875	84.6346	74.9445	71.5652	92.1653	70.9615	82.1514	61.1379	60.0894
Ciapin1	-0.236617	0.0901517	0.999875	377.106	320.903	314.793	361.207	291.449	240.789	260.855	345.275
Tsacc	-0.23654	0.60383	0.999875	11.7846	11.0656	11.6937	13.5537	10.6442	5.66562	16.3034	9.53799
Dyrk2	-0.23648	0.355064	0.999875	44.9956	48.2864	64.549	72.5124	55.2486	33.9937	44.8345	53.4128
Plec	-0.236422	0.0595237	0.999875	909.554	832.94	1064.59	826.777	722.286	685.539	929.296	772.577
Plcb2	-0.236392	0.462793	0.999875	40.7103	31.185	53.3231	29.1405	41.0563	28.3281	16.3034	34.3368
Gm37176	-0.23601	0.679256	0.999875	6.42794	5.53282	17.7744	16.9422	8.10988	8.49842	4.07586	16.2146
Kpna2	-0.235645	0.159975	0.999875	234.62	199.684	180.55	207.372	191.596	167.136	110.048	196.483
Mrpl2	-0.235502	0.140525	0.999875	173.554	143.853	144.066	149.091	134.32	152.972	97.8206	123.04
Asnsd1	-0.235434	0.380397	0.999875	41.7816	50.8013	36.0165	42.0165	38.0151	48.1577	20.3793	34.3368
Rpusd1	-0.235318	0.20467	0.999875	218.55	160.955	221.244	170.777	161.184	155.804	232.324	128.763
Grn	-0.235287	0.215935	0.999875	278.544	262.557	197.857	193.818	184.5	186.965	289.386	157.377
Chchd6	-0.235253	0.177019	0.999875	266.76	214.774	211.421	215.504	243.803	138.808	171.186	188.852
Cav1	-0.234929	0.249117	0.999875	72.85	93.0519	72.9684	73.1901	68.4271	67.9874	52.9862	69.6274
Rasal1	-0.234871	0.0864378	0.999875	207.837	205.72	223.115	239.901	194.13	161.47	183.414	194.575
Efcab10	-0.234696	0.683524	0.999875	10.7132	18.1074	7.95169	18.2975	16.7266	2.83281	0	18.1222
Map1s	-0.234571	0.0878836	0.999875	252.832	244.45	261.003	207.372	201.733	184.133	228.248	210.79
Fstl4	-0.234232	0.246943	0.999875	92.1339	75.4475	80.9201	86.0661	67.9203	53.8233	105.972	67.7198
Sec14l2	-0.234095	0.0949517	0.999875	239.977	234.39	199.26	210.083	175.376	184.133	220.096	185.991
Pcnx2	-0.234081	0.127567	0.999875	349.252	308.329	354.084	330.711	274.722	277.615	399.434	226.05
Slc15a3	-0.233983	0.566757	0.999875	16.0699	21.6283	19.1776	11.5207	12.6717	19.8297	8.15172	17.1684
Gm44667	-0.233939	0.513891	0.999875	17.1412	22.6342	21.0486	18.9752	15.206	16.9968	16.3034	20.0298
Mrrf	-0.233861	0.132301	0.999875	191.767	175.038	148.276	167.388	155.102	135.975	158.959	129.717
Tek	-0.233847	0.428091	0.999875	27.8544	32.6939	32.7422	28.4628	23.3159	25.4953	24.4552	30.5216
Il16	-0.233836	0.517169	0.999875	20.3552	28.1671	29.9358	18.9752	21.7953	11.3312	16.3034	27.6602
Kcnj8	-0.23381	0.590059	0.999875	9.64192	15.5925	19.6453	15.5868	16.2198	11.3312	8.15172	12.3994
Rrp9	-0.233774	0.14339	0.999875	155.342	145.865	172.131	159.256	137.361	107.647	122.276	154.515
Paqr5	-0.23356	0.565091	0.999875	17.1412	25.1492	21.5163	27.1074	26.3571	11.3312	4.07586	23.845
Pcdhga7	-0.233355	0.292333	0.999875	99.6331	60.861	88.8718	105.041	68.4271	76.4858	89.6689	73.4426
Hsf4	-0.233337	0.315524	0.999875	94.2765	98.5847	65.4845	78.6116	72.4821	96.3155	32.6069	74.3964
Ftl1	-0.233193	0.0551081	0.999875	1452.72	1456.64	1160.95	1158.84	1238.28	1101.96	1120.86	981.46
Cdh9	-0.233158	0.241343	0.999875	241.048	143.853	273.632	242.612	167.773	169.968	220.096	213.651
Trim27	-0.233155	0.226003	0.999875	127.488	112.668	86.0653	103.008	84.14	76.4858	105.972	99.1951
Tmem250-ps	-0.233114	0.0931471	0.999875	334.253	280.162	302.164	316.479	269.147	203.962	334.22	250.849
NA	-0.233094	0.667556	0.999875	14.9985	8.04773	11.2259	4.7438	7.60302	8.49842	8.15172	8.58419
Htra2	-0.233021	0.17066	0.999875	129.63	134.8	132.372	104.364	114.045	99.1483	105.972	103.01
Gm20449	-0.232982	0.719796	0.999875	3.21397	11.0656	17.3066	14.9091	18.2472	2.83281	0	11.4456
2510002D24Rik	-0.232978	0.241019	0.999875	96.4192	85.5072	127.695	107.752	91.2362	73.653	81.5172	100.149
Pex11a	-0.232561	0.293592	0.999875	61.0655	86.5131	70.162	73.1901	74.0027	56.6562	65.2137	50.5514
Gm43860	-0.232451	0.657593	0.999875	13.9272	10.5626	10.2904	6.09917	5.57554	14.164	8.15172	9.53799
Ubl7	-0.232412	0.153385	0.999875	223.907	212.259	182.421	195.174	204.775	164.303	183.414	136.393
Fam43b	-0.232383	0.424158	0.999875	66.4221	52.3103	31.8068	41.3389	42.07	53.8233	32.6069	33.383
Pcdhga4	-0.232338	0.367149	0.999875	42.853	46.7774	39.7584	52.8595	33.4533	33.9937	57.062	40.0596
Fam26e	-0.232178	0.475774	0.999875	19.2838	29.173	37.4197	38.6281	32.4395	22.6625	24.4552	23.845
2810049E08Rik	-0.232174	0.49232	0.999875	29.9971	27.1611	23.8551	18.9752	17.7404	31.1609	16.3034	21.9374
Zfp422-ps	-0.23209	0.349423	0.999875	55.7088	52.8132	58.4683	64.3802	63.3585	36.8265	36.6827	45.7824
Map6	-0.231994	0.0493553	0.999875	567.802	512.037	571.118	575.355	494.196	526.902	493.179	397.734
Fjx1	-0.231987	0.148731	0.999875	214.265	182.583	171.195	230.413	170.814	178.467	199.717	144.024
Ubl5	-0.231957	0.134638	0.999875	606.369	560.826	501.892	451.339	570.226	427.754	342.372	428.256
Ercc3	-0.231919	0.135135	0.999875	164.984	159.949	169.792	182.298	153.581	172.801	101.896	136.393
Sphk2	-0.231849	0.265365	0.999875	121.06	126.752	113.195	98.9422	125.196	76.4858	114.124	72.4888
Fam129c	-0.231746	0.540167	0.999875	24.6405	22.6342	36.0165	14.2314	17.2335	25.4953	16.3034	24.7988
A330094K24Rik	-0.23166	0.578589	0.999875	19.2838	13.5805	16.8389	12.1983	14.1923	11.3312	20.3793	9.53799
Tnip1	-0.231446	0.259838	0.999875	114.632	102.106	75.3072	109.785	91.7431	101.981	65.2137	76.304
Mest	-0.231429	0.174818	0.999875	212.122	207.229	235.744	229.736	204.775	195.464	101.896	219.374
Sh2d5	-0.231315	0.204063	0.999875	848.489	722.284	1327.93	806.446	734.958	699.704	1010.81	732.518
Cdcp1	-0.23114	0.677449	0.999875	7.49927	5.53282	10.7582	13.5537	9.63049	11.3312	4.07586	5.7228
Snhg18	-0.23105	0.661255	0.999875	9.64192	12.0716	5.61296	11.5207	7.09615	8.49842	8.15172	9.53799
Stk10	-0.231009	0.291711	0.999875	70.7074	67.3998	55.1941	62.3471	52.7142	70.8202	44.8345	50.5514
Sap30	-0.231008	0.509992	0.999875	37.4963	40.7416	25.7261	21.0083	17.2335	28.3281	28.531	35.2906
Akr1a1	-0.230971	0.0460072	0.999875	1751.61	1724.73	1369.09	1625.77	1555.07	1396.57	1202.38	1326.73
Gm26592	-0.230815	0.448496	0.999875	27.8544	34.7058	50.9844	31.1736	27.3709	39.6593	36.6827	28.614
Nat8	-0.230749	0.614786	0.999875	14.9985	29.173	8.88718	14.2314	14.6992	14.164	16.3034	13.3532
Zdhhc13	-0.230669	0.130914	0.999875	170.341	188.116	232.47	221.603	180.952	158.637	187.49	168.822
Ackr1	-0.230631	0.256545	0.999875	123.202	92.5489	108.985	101.653	76.537	107.647	126.352	76.304
Gm6030	-0.230538	0.552948	0.999875	14.9985	29.676	19.1776	23.0413	18.2472	22.6625	4.07586	23.845
Olfm2	-0.230531	0.288114	0.999875	172.483	163.47	92.146	168.066	136.347	144.473	126.352	102.057
Znrd1	-0.230513	0.254131	0.999875	84.6346	86.5131	94.017	88.0992	91.7431	59.489	61.1379	72.4888
Atp5d	-0.230459	0.0679823	0.999875	641.723	595.029	480.376	536.05	529.17	450.416	440.193	474.992
Rtbdn	-0.230456	0.500679	0.999875	25.7118	24.6462	17.3066	25.0744	19.261	16.9968	20.3793	20.9836
Gm7332	-0.230296	0.679722	0.999875	8.57059	9.55668	7.95169	6.77686	8.61675	2.83281	8.15172	6.6766
Kcnj4	-0.230257	0.26122	0.999875	511.022	278.653	458.391	391.025	305.641	294.612	521.71	299.493
Washc1	-0.230254	0.128672	0.999875	206.766	175.541	168.856	187.719	171.828	144.473	175.262	137.347
Serpinb9	-0.230232	0.286207	0.999875	77.1353	97.5788	66.8877	84.0331	78.0576	48.1577	73.3655	70.5812
Sh3yl1	-0.229975	0.3966	0.999875	38.5677	44.2625	32.7422	48.1157	37.5082	39.6593	24.4552	33.383
4921514A10Rik	-0.229811	0.660625	0.999875	14.9985	15.5925	17.3066	4.06612	14.1923	8.49842	8.15172	10.4918
Creld2	-0.229546	0.261497	0.999875	99.6331	124.74	141.259	136.893	131.279	70.8202	134.503	91.5647
Srr	-0.229533	0.0663077	0.999875	617.083	542.216	710.039	704.794	570.226	487.243	525.786	593.263
Slc9a5	-0.229245	0.153489	0.999875	284.972	253.001	340.519	214.826	240.762	209.628	252.703	230.819
Ptgfrn	-0.229177	0.147622	0.999875	168.198	150.392	144.534	157.223	145.471	107.647	154.883	119.225
Arsj	-0.22903	0.693475	0.999875	26.7831	9.55668	4.67746	12.876	16.7266	5.66562	8.15172	9.53799
Gm15559	-0.228669	0.617415	0.999875	11.7846	11.0656	10.7582	19.6529	13.1786	11.3312	12.2276	8.58419
Wisp1	-0.228482	0.642729	0.999875	12.8559	8.55072	16.3711	10.1653	13.6854	5.66562	12.2276	7.6304
Gpc4	-0.22843	0.57334	0.999875	17.1412	23.1372	19.6453	27.1074	28.3846	19.8297	8.15172	11.4456
Smim3	-0.228393	0.433438	0.999875	78.2067	67.3998	50.9844	42.0165	65.3859	25.4953	40.7586	56.2742
Iba57	-0.228349	0.415357	0.999875	32.1397	31.185	41.1617	45.405	33.9601	36.8265	24.4552	30.5216
Rnf126	-0.228231	0.147663	0.999875	244.262	192.14	247.438	189.752	176.897	195.464	224.172	167.869
Psd	-0.228201	0.0743516	0.999875	2020.52	1452.11	2059.02	1719.29	1505.4	1405.07	1773	1520.36
Wwc1	-0.228171	0.0529911	0.999875	467.097	512.037	539.312	571.967	464.291	388.095	513.558	429.21
Gm28320	-0.228033	0.699079	0.999875	6.42794	9.55668	9.82267	6.77686	8.10988	5.66562	0	9.53799
Creb3	-0.227985	0.105766	0.999875	379.249	403.393	356.891	350.364	369	274.782	244.552	343.368
Fbxw23	-0.227972	0.691504	0.999875	39.639	8.04773	33.21	14.2314	20.7816	5.66562	4.07586	41.0134
Strip1	-0.227945	0.135475	0.999875	271.045	325.933	223.115	289.372	261.037	226.625	207.869	235.588
Tmem132d	-0.227921	0.305824	0.999875	106.061	87.0161	93.5493	112.496	78.0576	101.981	126.352	58.1818
Naprt	-0.227682	0.416196	0.999875	40.7103	35.2088	34.1455	33.8843	35.4807	25.4953	24.4552	29.5678
Exph5	-0.227645	0.389915	0.999875	61.0655	42.7536	49.1134	76.5785	55.2486	56.6562	32.6069	43.8748
Plekho1	-0.227608	0.239545	0.999875	154.271	107.135	108.985	100.298	92.7568	84.9842	118.2	106.826
Cited4	-0.227529	0.586278	0.999875	17.1412	11.5686	16.3711	18.2975	13.1786	5.66562	24.4552	13.3532
Lgr5	-0.22741	0.471892	0.999875	31.0684	32.6939	32.7422	37.2727	19.261	25.4953	52.9862	30.5216
Rps19-ps2	-0.227392	0.670288	0.999875	9.64192	13.5805	13.5646	4.7438	9.63049	5.66562	8.15172	10.4918
NA	-0.227265	0.437155	0.999875	44.9956	30.682	36.952	30.4959	35.9876	28.3281	24.4552	26.7064
Fat3	-0.227194	0.0307844	0.999875	838.847	867.143	871.879	742.744	662.983	796.019	701.048	696.274
Il15	-0.22714	0.667428	0.999875	17.1412	7.54475	7.48394	9.48761	9.63049	8.49842	12.2276	5.7228
Pml	-0.22712	0.309001	0.999875	97.4905	62.3699	94.4848	80.6446	61.331	90.6498	81.5172	64.8584
E2f3	-0.227021	0.139805	0.999875	143.557	156.931	170.727	167.388	125.196	135.975	130.427	154.515
Pik3r2	-0.226986	0.0626299	0.999875	449.956	365.166	403.197	449.984	363.424	320.107	391.282	350.044
Plxnc1	-0.226974	0.174267	0.999875	365.321	494.936	375.6	473.703	467.839	308.776	289.386	363.398
4930520O04Rik	-0.226973	0.719256	0.999875	9.64192	6.53878	7.0162	10.843	11.658	2.83281	0	7.6304
B4galt3	-0.226946	0.106243	0.999875	174.626	177.05	189.905	189.074	164.225	167.136	150.807	143.07
Slc32a1	-0.226917	0.176548	0.999875	855.988	824.39	617.425	793.57	646.256	742.196	827.399	456.87
Nlrp1b	-0.226754	0.647341	0.999875	13.9272	9.0537	9.82267	8.80992	7.60302	8.49842	8.15172	10.4918
Mical2	-0.226626	0.0898702	0.999875	491.738	406.913	526.682	563.835	445.03	368.265	411.662	456.87
Usp27x	-0.226596	0.252467	0.999875	113.56	122.728	103.372	116.562	121.648	70.8202	114.124	78.2115
Tuba4a	-0.226563	0.0144855	0.999875	2352.63	2100.46	2182.97	2189.6	2077.14	1900.81	1821.91	1724.47
Alg5	-0.226526	0.230706	0.999875	131.773	153.41	136.114	115.207	143.444	101.981	89.6689	104.918
Wnt7b	-0.226375	0.228565	0.999875	99.6331	114.177	87.9363	92.843	79.5782	104.814	81.5172	79.1653
Gaa	-0.226343	0.164409	0.999875	1444.14	1728.75	1306.88	1799.93	1604.24	1354.08	1491.76	928.047
NA	-0.226275	0.4974	0.999875	25.7118	25.1492	25.7261	18.9752	20.7816	14.164	28.531	20.0298
Gm14703	-0.226174	0.535593	0.999875	18.2125	20.1193	18.7099	21.686	16.7266	8.49842	20.3793	20.0298
Gm37233	-0.226112	0.564449	0.999875	21.4265	17.1014	29.9358	29.8182	17.7404	22.6625	44.8345	12.3994
Dact2	-0.226057	0.326985	0.999875	139.272	109.65	181.486	173.488	115.059	138.808	199.717	89.6571
Myo1h	-0.225933	0.685194	0.999875	9.64192	17.1014	9.82267	15.5868	19.7678	5.66562	0	10.4918
Sap30bp	-0.225841	0.0653646	0.999875	424.244	389.309	374.665	426.942	383.699	291.779	350.524	335.737
Rnasel	-0.225762	0.280481	0.999875	70.7074	86.5131	82.3234	95.5537	86.1675	67.9874	52.9862	66.766
Phf21b	-0.225737	0.34826	0.999875	74.9927	51.8073	71.5652	52.8595	52.2074	59.489	32.6069	61.0432
Cd14	-0.225707	0.526827	0.999875	24.6405	39.7357	25.7261	17.6198	27.3709	22.6625	24.4552	18.1222
Sez6l	-0.225604	0.17542	0.999875	466.026	614.143	391.971	532.661	501.799	481.577	321.993	391.058
Apobr	-0.225173	0.723312	0.999875	17.1412	11.0656	5.14521	4.7438	10.1374	5.66562	0	10.4918
Gm37397	-0.225163	0.564287	0.999875	16.0699	26.6581	14.0324	21.686	19.261	16.9968	20.3793	12.3994
Garnl3	-0.225129	0.157192	0.999875	367.464	321.909	391.036	475.736	356.835	334.271	236.4	374.843
Rrp12	-0.22504	0.12917	0.999875	186.41	178.559	175.873	199.24	171.828	152.972	179.338	134.486
Zdhhc7	-0.225022	0.190792	0.999875	171.412	129.267	132.84	145.025	120.128	144.473	138.579	103.964
Dcaf15	-0.224995	0.202359	0.999875	106.061	116.692	116.001	95.5537	98.3323	96.3155	73.3655	94.4261
Sema4c	-0.224239	0.254913	0.999875	81.4206	70.9206	91.2106	80.6446	71.9752	76.4858	57.062	67.7198
Sirpa	-0.224103	0.0423309	0.999875	1478.43	1252.43	1270.4	1544.45	1194.69	1178.45	1324.65	1070.16
Lrrn3	-0.224033	0.0886437	0.999875	546.375	708.2	707.7	681.752	625.475	541.066	452.42	613.293
Akap13	-0.224006	0.164724	0.999875	294.614	295.754	450.908	326.645	284.353	263.451	338.296	296.632
Ntpcr	-0.223875	0.219551	0.999875	93.2052	93.5549	94.9525	100.298	86.1675	87.817	93.7448	67.7198
Gm21992	-0.22387	0.437152	0.999875	42.853	27.1611	43.9682	36.595	30.4121	33.9937	24.4552	36.2444
Swsap1	-0.223772	0.358963	0.999875	82.4919	54.3222	59.4038	56.2479	59.3035	70.8202	36.6827	43.8748
Adgre1	-0.223692	0.393876	0.999875	96.4192	92.0459	52.8553	57.6033	55.7554	90.6498	48.9103	61.997
Baiap3	-0.223677	0.319761	0.999875	339.61	592.011	352.681	508.265	551.979	365.432	236.4	355.767
Zfp688	-0.223585	0.398555	0.999875	62.1368	43.2566	44.9037	35.9174	42.07	39.6593	44.8345	33.383
D6Wsu163e	-0.22351	0.0513799	0.999875	324.611	303.802	311.519	319.19	278.27	254.953	264.931	269.925
Gm37953	-0.223381	0.664384	0.999875	18.2125	10.0597	7.0162	13.5537	7.60302	11.3312	4.07586	15.2608
Henmt1	-0.223182	0.679781	0.999875	9.64192	7.54475	10.2904	8.13223	7.60302	11.3312	12.2276	3.8152
Wdr46	-0.22316	0.334894	0.999875	73.9214	61.8669	60.3393	49.4711	50.6868	39.6593	52.9862	61.0432
Btbd10	-0.223137	0.0739957	0.999875	473.525	404.399	471.021	525.207	414.111	450.416	374.979	366.259
Gm33027	-0.223047	0.696821	0.999875	6.42794	9.0537	7.48394	10.1653	8.10988	2.83281	4.07586	9.53799
Sqle	-0.222961	0.118871	0.999875	316.041	309.335	310.584	372.727	294.49	348.435	216.021	254.664
Cmip	-0.222955	0.0802554	0.999875	529.234	514.552	477.569	527.24	492.675	444.751	472.8	351.952
Pitpnm2	-0.22292	0.0855508	0.999875	1123.82	1006.97	1309.22	920.975	884.991	832.845	1067.88	965.245
Casp7	-0.222915	0.582145	0.999875	11.7846	21.6283	17.7744	15.5868	12.1648	11.3312	24.4552	15.2608
Gnb1l	-0.222887	0.583149	0.999875	22.4978	14.0835	20.1131	18.2975	21.2884	11.3312	8.15172	15.2608
Gm10863	-0.222791	0.555394	0.999875	18.2125	25.6521	49.1134	25.0744	26.3571	33.9937	32.6069	16.2146
Zfp580	-0.222747	0.35448	0.999875	42.853	44.2625	50.0489	54.2149	40.5494	36.8265	48.9103	41.0134
Snrpd3	-0.222587	0.0672695	0.999875	584.943	537.689	493.472	489.967	505.347	385.262	427.965	455.916
Sipa1l1	-0.222512	0.164315	0.999875	1753.76	1505.43	2182.97	2008.66	1620.46	1419.24	2123.52	1254.25
2900079G21Rik	-0.222497	0.536042	0.999875	20.3552	17.6044	21.5163	18.9752	16.2198	14.164	16.3034	19.076
Tbc1d10a	-0.222423	0.229885	0.999875	140.343	126.249	138.453	93.5207	105.935	93.4827	126.352	105.872
Myc	-0.222323	0.574158	0.999875	13.9272	20.6223	21.5163	22.3636	20.2747	25.4953	16.3034	8.58419
Gm16279	-0.222234	0.586523	0.999875	12.8559	23.6402	22.4518	21.686	13.1786	5.66562	36.6827	20.9836
Usp5	-0.222191	0.0465328	0.999875	917.053	855.072	800.314	977.223	822.646	702.536	827.399	691.505
Grp	-0.222165	0.694862	0.999875	9.64192	12.0716	5.61296	10.843	12.1648	8.49842	4.07586	4.769
Mt1	-0.221699	0.28543	0.999875	908.483	1363.59	920.525	670.232	1130.32	606.221	721.427	831.713
Btla	-0.221578	0.706987	0.999875	6.42794	13.5805	6.0807	7.45455	9.63049	2.83281	12.2276	4.769
D5Ertd579e	-0.221565	0.0473732	0.999875	1118.46	993.895	1337.75	1143.93	987.378	1050.97	953.751	951.892
Kctd11	-0.221457	0.578186	0.999875	21.4265	13.5805	14.9679	18.2975	15.7129	16.9968	16.3034	10.4918
Kcnmb4	-0.221335	0.320351	0.999875	102.847	64.3819	73.4362	88.7769	62.3447	56.6562	77.4413	82.9805
Iah1	-0.221332	0.32284	0.999875	58.9228	58.3461	81.8556	63.7025	56.2623	45.3249	65.2137	60.0894
Gm10010	-0.221297	0.520724	0.999875	20.3552	19.6163	26.6615	33.2066	21.7953	25.4953	12.2276	22.8912
Chd3	-0.221268	0.0105905	0.976351	3489.3	3184.89	3118.47	3473.82	3032.08	2897.96	2767.51	2667.78
Gm1976	-0.22117	0.205013	0.999875	167.127	128.261	171.195	189.752	125.703	169.968	126.352	144.978
Sdk2	-0.221075	0.245742	0.999875	113.56	113.171	116.469	118.595	102.387	76.4858	69.2896	124.948
Lmo1	-0.221022	0.464755	0.999875	29.9971	33.6999	29.9358	29.1405	31.4258	31.1609	20.3793	20.0298
Hmgcs1	-0.221015	0.0850203	0.999875	1698.05	1599.49	1546.37	1928.02	1497.79	1651.53	1092.33	1537.52
Prag1	-0.220974	0.274586	0.999875	109.275	98.5847	90.2751	110.463	107.963	59.489	81.5172	83.9343
Chrm5	-0.220949	0.687952	0.999875	9.64192	20.1193	9.35493	6.77686	12.1648	14.164	12.2276	3.8152
Sh3pxd2b	-0.220947	0.243903	0.999875	122.131	154.919	96.8235	119.273	109.483	101.981	105.972	103.964
Nck1	-0.220882	0.172546	0.999875	223.907	215.78	195.518	231.091	212.378	175.634	118.2	202.205
Gm26945	-0.220819	0.362464	0.999875	49.2809	58.3461	70.162	55.5703	52.7142	31.1609	48.9103	60.0894
Serpini1	-0.220726	0.0831948	0.999875	1985.16	1484.81	1406.51	1640.68	1375.64	1572.21	1202.38	1424.98
Bcl2l12	-0.220709	0.635078	0.999875	13.9272	19.1134	12.1614	10.843	13.6854	22.6625	4.07586	7.6304
Camta2	-0.220567	0.0541636	0.999875	638.509	627.22	712.846	640.413	548.938	507.073	692.896	530.312
Adamts3	-0.22055	0.322599	0.999875	202.48	167.493	332.568	229.058	153.074	212.461	281.234	179.314
Mfap3l	-0.220494	0.153027	0.999875	715.644	677.518	681.974	595.686	470.373	631.716	440.193	734.426
Alg3	-0.220494	0.370776	0.999875	62.1368	58.849	40.2262	52.1818	43.0838	45.3249	57.062	42.921
Cyp2s1	-0.22042	0.446909	0.999875	64.2794	36.2148	79.9846	83.3554	51.1936	62.3218	81.5172	43.8748
Tle2	-0.220402	0.222391	0.999875	132.844	139.829	167.453	113.851	116.073	110.48	101.896	138.301
Irf2bpl	-0.220323	0.132027	0.999875	313.898	254.51	303.567	321.901	252.927	249.287	330.145	217.466
Gm15927	-0.220266	0.644704	0.999875	16.0699	10.5626	15.4356	11.5207	16.7266	5.66562	8.15172	9.53799
Sbk1	-0.220093	0.106128	0.999875	394.247	301.287	374.665	304.281	286.38	320.107	301.614	279.463
1110019D14Rik	-0.219899	0.566485	0.999875	10.7132	20.1193	26.1938	25.0744	18.7541	22.6625	16.3034	15.2608
Stat3	-0.219861	0.123521	0.999875	366.393	394.842	313.39	279.207	312.737	269.117	285.31	285.186
Tnfsf10	-0.219827	0.664093	0.999875	13.9272	12.5746	9.35493	10.843	6.08241	11.3312	24.4552	7.6304
Rpusd2	-0.219719	0.4722	0.999875	49.2809	34.2029	39.2907	42.6942	27.8777	56.6562	48.9103	23.845
Gpc2	-0.219534	0.59076	0.999875	21.4265	16.0955	20.1131	14.9091	21.7953	11.3312	12.2276	11.4456
Mthfd1l	-0.219502	0.324687	0.999875	85.7059	89.531	58.0006	94.8761	74.5096	53.8233	77.4413	71.535
Gm47079	-0.219468	0.615611	0.999875	26.7831	12.5746	33.21	13.5537	16.2198	11.3312	36.6827	16.2146
Dcc	-0.219405	0.346823	0.999875	107.132	85.0042	145.001	124.017	98.8392	150.139	81.5172	73.4426
Ciz1	-0.219302	0.0972587	0.999875	284.972	262.054	337.713	301.57	255.461	232.29	260.855	267.064
Pcdhgb4	-0.219286	0.495781	0.999875	53.5662	33.1969	28.0648	32.5289	27.3709	19.8297	57.062	29.5678
Gm44954	-0.219192	0.611175	0.999875	17.1412	9.55668	14.5001	16.9422	11.658	14.164	16.3034	10.4918
Ap1s1	-0.218989	0.0539279	0.999875	1735.54	1357.05	1671.26	1377.06	1261.59	1223.77	1434.7	1362.98
Myo1c	-0.218986	0.304428	0.999875	93.2052	81.4833	72.0329	62.3471	63.3585	50.9905	81.5172	70.5812
Hrh1	-0.218967	0.496632	0.999875	54.6375	75.9505	28.0648	50.1488	54.7417	50.9905	24.4552	41.0134
Tmem141	-0.218864	0.372264	0.999875	73.9214	57.3401	52.8553	54.8926	58.7967	59.489	24.4552	48.6438
Mrps28	-0.218783	0.380011	0.999875	66.4221	52.3103	52.8553	54.2149	50.1799	42.4921	24.4552	60.0894
Dlx6os1	-0.218702	0.134541	0.999875	301.042	288.209	341.455	250.744	261.037	198.297	277.158	272.787
Colgalt2	-0.218669	0.423286	0.999875	32.1397	40.7416	42.0972	50.1488	39.5357	22.6625	36.6827	38.152
Homer1	-0.218636	0.249544	0.999875	1277.02	894.304	1888.29	1200.18	912.869	1070.8	1259.44	1287.63
Adcy6	-0.218536	0.215093	0.999875	227.121	301.287	237.147	271.752	254.954	195.464	142.655	265.156
1700030J22Rik	-0.218507	0.50546	0.999875	23.5691	29.173	33.6777	44.7273	37.0013	28.3281	24.4552	20.0298
Zfp646	-0.218454	0.186569	0.999875	154.271	156.931	163.244	173.488	126.21	116.145	203.793	135.44
Ten1	-0.218366	0.207711	0.999875	102.847	101.1	96.3558	97.5868	85.6606	73.653	89.6689	89.6571
Prelid1	-0.218312	0.114688	0.999875	599.941	606.095	494.408	496.066	504.84	566.562	370.903	432.071
Tmem198b	-0.218289	0.347679	0.999875	59.9941	91.04	64.0813	66.4132	55.7554	79.3186	69.2896	51.5052
Gm44829	-0.218209	0.527402	0.999875	27.8544	19.6163	29.9358	28.4628	22.3022	22.6625	8.15172	29.5678
Tmem109	-0.21816	0.181683	0.999875	193.91	161.458	148.743	180.264	167.773	144.473	138.579	126.855
Map3k10	-0.218065	0.0967409	0.999875	702.789	554.791	663.732	544.182	477.976	529.735	639.91	501.698
Rab27a	-0.217821	0.275427	0.999875	97.4905	91.543	90.2751	89.4546	89.2087	59.489	57.062	89.6571
Mpzl3	-0.217794	0.439671	0.999875	46.0669	36.2148	67.8232	44.7273	44.0975	33.9937	61.1379	35.2906
Abca7	-0.217777	0.220133	0.999875	146.771	138.823	116.937	103.686	108.977	107.647	93.7448	115.41
Rec8	-0.217661	0.407075	0.999875	42.853	47.7834	53.3231	48.7934	52.7142	33.9937	48.9103	29.5678
Pi15	-0.217547	0.667785	0.999875	10.7132	9.55668	7.0162	13.5537	8.10988	5.66562	12.2276	9.53799
Mief2	-0.217402	0.310613	0.999875	73.9214	65.8908	67.8232	67.0909	59.3035	56.6562	85.593	47.69
Nmb	-0.217379	0.530265	0.999875	21.4265	25.6521	21.5163	19.6529	17.7404	11.3312	28.531	20.9836
Gm43719	-0.217359	0.656467	0.999875	7.49927	8.55072	14.0324	17.6198	8.61675	14.164	8.15172	11.4456
Bola2	-0.217215	0.260586	0.999875	238.905	218.798	196.921	149.091	195.144	167.136	105.972	195.529
Ppp1r9b	-0.216933	0.0815217	0.999875	5313.77	3982.12	5557.3	4687.55	4155.3	3761.97	4911.41	4003.1
4933417D19Rik	-0.216913	0.667356	0.999875	11.7846	10.0597	21.0486	8.80992	11.658	2.83281	12.2276	15.2608
Fam46c	-0.216712	0.462867	0.999875	42.853	62.8729	37.4197	33.2066	34.467	25.4953	48.9103	44.8286
Ino80e	-0.21654	0.204669	0.999875	248.547	201.696	215.631	168.066	183.486	127.476	224.172	183.129
A830036E02Rik	-0.216501	0.525732	0.999875	476.739	340.017	217.034	267.008	187.541	226.625	415.738	298.539
Ttc7	-0.216493	0.302363	0.999875	101.776	71.4236	89.3396	76.5785	66.9065	53.8233	85.593	83.9343
6430590A07Rik	-0.216396	0.468567	0.999875	32.1397	42.7536	34.1455	39.9835	27.3709	39.6593	12.2276	42.921
Prcc	-0.215743	0.163559	0.999875	233.549	209.744	185.228	218.893	204.775	178.467	199.717	147.839
Fam222b	-0.215712	0.159034	0.999875	144.629	137.817	142.195	137.57	128.238	130.309	114.124	109.687
Atcayos	-0.215655	0.466711	0.999875	36.425	31.6879	36.4842	27.1074	29.9052	16.9968	28.531	32.4292
Gm17825	-0.215549	0.726565	0.999875	5.35662	10.5626	11.2259	4.7438	10.6442	5.66562	4.07586	4.769
Rangap1	-0.215498	0.0856558	0.999875	1014.54	1023.07	869.541	1129.03	940.24	982.984	827.399	727.749
Brat1	-0.215344	0.257175	0.999875	126.416	124.74	151.55	102.331	104.415	84.9842	150.807	107.779
Gm10118	-0.215076	0.44263	0.999875	35.3537	33.6999	46.7746	37.2727	36.4945	19.8297	44.8345	31.4754
Parvb	-0.21503	0.290803	0.999875	98.5618	131.279	92.146	96.2314	98.8392	107.647	57.062	86.7957
Podxl	-0.214871	0.370086	0.999875	55.7088	72.4296	64.549	63.0248	42.5769	82.1514	61.1379	51.5052
Hs6st3	-0.214841	0.504412	0.999875	50.3522	34.2029	53.3231	46.7603	28.3846	42.4921	81.5172	27.6602
Urb1	-0.214828	0.239745	0.999875	92.1339	96.0698	111.791	126.727	90.2225	84.9842	97.8206	96.3337
Pcsk2os2	-0.214783	0.623399	0.999875	16.0699	11.0656	20.5808	16.9422	10.6442	5.66562	28.531	16.2146
Eif3l	-0.214555	0.122794	0.999875	430.672	401.884	431.262	522.496	450.099	373.931	309.765	374.843
P4ha1	-0.214502	0.108937	0.999875	567.802	475.822	665.603	504.198	514.471	456.082	501.331	436.84
9330154J02Rik	-0.214367	0.680463	0.999875	16.0699	8.04773	11.2259	8.13223	6.08241	8.49842	20.3793	8.58419
Nr6a1	-0.214241	0.266541	0.999875	100.704	75.4475	100.565	91.4876	72.989	90.6498	77.4413	80.1191
Mylk	-0.214179	0.339104	0.999875	71.7787	88.0221	59.4038	77.2562	63.8653	65.1546	40.7586	74.3964
Gas2l1	-0.2141	0.209181	0.999875	309.613	242.438	280.648	184.331	224.036	223.792	240.476	194.575
Col1a2	-0.214079	0.554772	0.999875	46.0669	47.2804	22.4518	52.1818	55.7554	19.8297	36.6827	24.7988
Pcdhb14	-0.214035	0.194053	0.999875	170.341	183.589	254.922	201.95	168.787	175.634	203.793	166.915
Galt	-0.213993	0.171956	0.999875	163.913	159.949	180.55	149.769	160.677	130.309	134.503	128.763
Mvk	-0.213876	0.276236	0.999875	92.1339	82.4893	72.0329	77.9339	72.989	67.9874	57.062	71.535
Shank1	-0.213694	0.0200986	0.999875	1264.16	1262.99	1226.9	1158.84	1006.13	1118.96	978.206	1124.53
Rps4x	-0.213677	0.0746227	0.999875	2434.05	2469.65	2354.17	2339.37	2565.26	1926.31	1720.01	2012.52
Ykt6	-0.213666	0.0673019	0.999875	635.295	598.047	579.07	552.314	575.802	495.741	419.813	508.375
Cacng8	-0.213646	0.135205	0.999875	242.119	228.354	279.245	257.521	200.72	240.789	260.855	195.529
Ppp1r14c	-0.213621	0.392036	0.999875	79.278	79.9743	46.7746	63.7025	54.7417	76.4858	36.6827	60.0894
Ctnnbl1	-0.213611	0.132064	0.999875	237.834	223.325	270.357	263.62	244.31	195.464	207.869	198.39
Cox10	-0.213595	0.30832	0.999875	80.3493	83.9982	83.2589	90.1322	74.5096	84.9842	97.8206	51.5052
Aspg	-0.213575	0.54792	0.999875	25.7118	55.3282	27.1293	23.719	33.9601	25.4953	32.6069	22.8912
Gfra2	-0.21351	0.372756	0.999875	93.2052	115.686	90.2751	124.017	116.58	104.814	93.7448	52.459
Gm13563	-0.213408	0.363746	0.999875	49.2809	53.8192	62.2103	48.1157	49.673	36.8265	57.062	42.921
Pck2	-0.213362	0.298871	0.999875	106.061	110.153	86.0653	92.1653	104.415	67.9874	65.2137	82.9805
Gm35315	-0.213191	0.657681	0.999875	20.3552	8.55072	10.2904	12.876	11.658	16.9968	8.15172	7.6304
Dnd1	-0.213146	0.646136	0.999875	8.57059	16.0955	16.3711	9.48761	11.1511	11.3312	8.15172	12.3994
Srpk1	-0.213096	0.120127	0.999875	599.941	567.365	810.137	600.43	501.292	549.565	603.227	585.633
Il17rb	-0.213009	0.527585	0.999875	25.7118	19.6163	24.3228	27.7851	20.2747	11.3312	32.6069	21.9374
Ptprs	-0.212873	0.0212967	0.999875	1650.91	1617.59	1781.18	1476.68	1432.41	1402.24	1332.81	1446.91
Gm44234	-0.212731	0.689171	0.999875	10.7132	12.0716	7.95169	7.45455	10.6442	8.49842	4.07586	6.6766
Zfp777	-0.212645	0.199817	0.999875	127.488	112.668	113.195	116.562	108.977	99.1483	89.6689	97.2875
Gm42937	-0.212601	0.74785	0.999875	1.07132	11.5686	11.6937	6.09917	8.10988	8.49842	8.15172	3.8152
Pcdhb9	-0.212487	0.241221	0.999875	184.268	145.865	126.292	136.893	146.485	135.975	105.972	110.641
Zfyve26	-0.212371	0.232598	0.999875	141.415	146.871	173.066	169.422	144.964	93.4827	122.276	164.053
Shmt1	-0.212146	0.475569	0.999875	24.6405	35.2088	29.0003	34.562	26.864	33.9937	20.3793	25.7526
Snca	-0.212144	0.0953122	0.999875	1119.53	898.831	1331.67	1199.5	1050.23	923.495	957.827	983.367
Erap1	-0.212071	0.257647	0.999875	119.988	138.32	103.84	105.719	115.059	79.3186	93.7448	102.057
Isoc2b	-0.211895	0.442351	0.999875	32.1397	37.2208	48.6456	51.5041	41.5632	25.4953	44.8345	34.3368
H2-M10.2	-0.211858	0.691131	0.999875	5.35662	19.1134	14.5001	9.48761	9.63049	2.83281	12.2276	16.2146
Srebf2	-0.211735	0.0521716	0.999875	891.342	788.678	957.477	918.942	788.686	815.849	807.02	677.198
D430018E03Rik	-0.211376	0.70126	0.999875	10.7132	6.53878	18.2421	10.1653	5.06868	5.66562	16.3034	15.2608
Bnip3l-ps	-0.211343	0.669606	0.999875	12.8559	12.0716	12.6292	6.09917	10.1374	8.49842	8.15172	9.53799
Syn1	-0.211335	0.140519	0.999875	832.419	686.069	622.103	887.091	680.723	671.375	741.806	536.035
Scg2	-0.211118	0.173172	0.999875	3515.01	4221.04	3668.07	2891.69	3745.75	3504.18	2315.09	2760.3
Ptpn2	-0.21104	0.164333	0.999875	191.767	176.044	188.97	164.678	141.923	169.968	126.352	177.407
Ltk	-0.211024	0.264765	0.999875	94.2765	82.4893	91.2106	84.0331	74.5096	70.8202	61.1379	86.7957
Ccnd2	-0.210975	0.215525	0.999875	443.528	331.466	554.747	508.942	410.056	303.11	419.813	446.378
Gm48677	-0.210742	0.597537	0.999875	20.3552	20.1193	48.1779	20.3306	18.2472	28.3281	16.3034	31.4754
Ttll1	-0.210729	0.135756	0.999875	245.333	234.893	243.696	280.562	223.022	263.451	199.717	187.898
Map2k1	-0.210682	0.0298408	0.999875	1620.91	1497.38	1462.18	1652.2	1347.25	1243.6	1532.52	1283.81
Cyp4f14	-0.210616	0.271559	0.999875	94.2765	121.722	88.8718	90.8099	91.2362	76.4858	89.6689	82.9805
Adgrb2	-0.210472	0.134764	0.999875	1286.66	1054.25	1435.05	1246.94	924.527	1016.98	1410.25	1030.1
Zdhhc8	-0.210448	0.164981	0.999875	337.467	301.287	267.551	247.355	228.597	229.457	326.069	235.588
Zic3	-0.210406	0.490742	0.999875	52.4949	58.3461	68.291	65.0579	69.9477	36.8265	12.2276	69.6274
Tsr1	-0.210292	0.107745	0.999875	406.032	351.082	454.65	483.19	361.904	354.101	362.751	382.474
Pknox2	-0.210262	0.1466	0.999875	307.47	241.432	332.568	305.636	239.748	266.284	301.614	239.404
Ankrd27	-0.210257	0.143734	0.999875	229.263	190.128	203.47	185.686	172.335	152.972	171.186	190.76
Gle1	-0.210255	0.0771023	0.999875	326.754	308.832	302.164	303.603	268.133	260.618	309.765	249.895
Gm15813	-0.210237	0.619838	0.999875	18.2125	24.6462	37.8875	17.6198	9.63049	22.6625	32.6069	28.614
Lmcd1	-0.210197	0.533195	0.999875	20.3552	24.6462	29.468	25.0744	23.8228	25.4953	8.15172	22.8912
AU022252	-0.210105	0.0896153	0.999875	243.191	238.917	257.261	241.256	209.843	201.129	224.172	215.559
Sgsm3	-0.210084	0.0814943	0.999875	288.186	295.754	302.632	296.827	266.612	226.625	293.462	243.219
Gm13112	-0.210057	0.614515	0.999875	22.4978	22.6342	19.6453	10.1653	14.1923	28.3281	16.3034	11.4456
Gm45441	-0.210009	0.59154	0.999875	16.0699	16.0955	14.9679	16.2645	13.6854	14.164	16.3034	12.3994
Rgs20	-0.209965	0.225137	0.999875	254.975	251.995	328.826	277.174	216.433	257.786	338.296	187.898
Zhx2	-0.209959	0.262986	0.999875	126.416	133.291	93.5493	111.141	111.004	104.814	85.593	91.5647
Tubgcp6	-0.209915	0.0927951	0.999875	260.332	251.492	285.793	250.744	220.487	226.625	228.248	233.681
Mmp24	-0.209844	0.179593	0.999875	201.409	151.398	181.018	156.545	147.499	133.142	167.11	149.747
0610040J01Rik	-0.209807	0.559785	0.999875	32.1397	22.1313	16.3711	24.3967	22.3022	19.8297	12.2276	20.9836
Tenm4	-0.209802	0.147239	0.999875	620.297	693.614	901.347	729.868	705.053	594.89	733.655	528.405
Dnajc4	-0.209688	0.257946	0.999875	78.2067	91.04	91.2106	94.8761	79.5782	65.1546	77.4413	81.0729
Gm45457	-0.209651	0.724601	0.999875	4.2853	11.5686	11.6937	5.42149	6.08241	2.83281	16.3034	7.6304
Adcy2	-0.209611	0.0972381	0.999875	542.09	578.934	520.602	579.422	535.759	555.23	399.434	417.764
Zfp871	-0.209593	0.269046	0.999875	349.252	345.55	455.585	408.645	367.479	331.439	183.414	432.071
Lzic	-0.209592	0.322643	0.999875	87.8486	73.9385	65.4845	83.3554	74.0027	50.9905	85.593	58.1818
Thg1l	-0.20934	0.343857	0.999875	73.9214	66.3938	80.9201	57.6033	63.8653	59.489	77.4413	48.6438
Fzd1	-0.209314	0.551448	0.999875	56.7802	63.8789	42.5649	59.6364	80.592	14.164	28.531	50.5514
Gm14377	-0.20927	0.752111	0.999875	4.2853	7.04177	15.4356	4.7438	5.57554	0	12.2276	10.4918
Ppp1r26	-0.209206	0.294555	0.999875	123.202	130.776	81.3879	124.017	100.867	110.48	97.8206	89.6571
Kcna3	-0.209105	0.39955	0.999875	44.9956	48.7894	51.9199	49.4711	50.6868	31.1609	36.6827	41.0134
Cdh11	-0.208957	0.110896	0.999875	447.813	417.476	565.973	540.116	423.235	410.757	407.586	456.87
Rtl9	-0.208884	0.531507	0.999875	21.4265	25.1492	23.8551	24.3967	22.809	28.3281	12.2276	17.1684
Birc3	-0.20865	0.577301	0.999875	19.2838	19.1134	25.7261	18.2975	23.3159	16.9968	12.2276	14.307
Sorbs2os	-0.208544	0.398767	0.999875	43.9243	51.8073	73.9039	63.0248	56.2623	42.4921	44.8345	52.459
Gpr19	-0.208453	0.27717	0.999875	110.346	80.9803	100.565	96.9091	85.1538	62.3218	105.972	83.9343
Sesn2	-0.208436	0.504454	0.999875	43.9243	56.3341	29.9358	27.1074	34.467	39.6593	36.6827	28.614
Polr3a	-0.208176	0.118795	0.999875	237.834	215.78	253.986	258.876	208.83	206.795	187.49	222.235
Lmo4	-0.208173	0.140837	0.999875	672.791	543.725	729.684	747.488	537.787	538.233	745.882	540.804
Sorcs3	-0.207911	0.140076	0.999875	244.262	252.498	254.922	283.273	229.611	254.953	248.627	183.129
Slc40a1	-0.207901	0.41074	0.999875	39.639	48.2864	48.1779	46.0827	31.9327	42.4921	48.9103	43.8748
Plcxd1	-0.207825	0.234461	0.999875	146.771	113.674	158.098	158.579	121.141	107.647	154.883	123.994
Nos1	-0.207669	0.261943	0.999875	279.616	258.533	252.115	319.868	222.515	274.782	334.22	164.053
Kcnab2	-0.20765	0.080547	0.999875	1533.06	1154.35	1201.17	1148.68	1066.96	1116.13	1190.15	1003.4
Hunk	-0.20761	0.345545	0.999875	74.9927	88.0221	65.9522	58.281	68.4271	62.3218	57.062	57.228
Fosb	-0.20759	0.668133	0.999875	92.1339	61.364	248.841	114.529	82.1126	87.817	146.731	134.486
Nacc1	-0.207475	0.0604957	0.999875	517.449	479.846	433.133	468.959	414.111	422.088	432.041	384.381
Frat2	-0.207413	0.438036	0.999875	36.425	39.7357	35.5487	37.2727	34.467	31.1609	40.7586	26.7064
C530005A16Rik	-0.207347	0.517501	0.999875	27.8544	31.185	31.8068	26.4298	32.9464	16.9968	32.6069	18.1222
Gm6542	-0.207317	0.698905	0.999875	14.9985	6.53878	9.35493	8.13223	7.60302	8.49842	4.07586	10.4918
Ptch2	-0.207292	0.580179	0.999875	31.0684	28.67	45.8391	14.9091	19.7678	28.3281	24.4552	33.383
Lcor	-0.207059	0.252319	0.999875	137.129	147.877	151.55	118.595	105.935	121.811	93.7448	150.7
Dio2	-0.206834	0.293818	0.999875	539.947	362.651	326.019	420.165	421.207	300.278	232.324	436.84
Tmppe	-0.206813	0.538546	0.999875	28.9257	41.2446	27.597	43.3719	39.5357	33.9937	36.6827	15.2608
Sbno2	-0.206789	0.298245	0.999875	107.132	118.704	128.163	78.6116	98.3323	84.9842	93.7448	95.3799
Myh9	-0.206753	0.111468	0.999875	448.885	475.319	550.538	416.777	419.686	356.934	480.951	394.873
1700014D04Rik	-0.206734	0.69703	0.999875	8.57059	7.04177	19.6453	8.13223	8.61675	11.3312	12.2276	8.58419
Vav1	-0.206717	0.44315	0.999875	48.2096	37.2208	37.4197	39.3058	36.4945	42.4921	40.7586	25.7526
9930012K11Rik	-0.2067	0.710995	0.999875	13.9272	7.54475	14.9679	4.7438	11.658	5.66562	8.15172	7.6304
Nradd	-0.206319	0.629097	0.999875	12.8559	19.6163	14.5001	16.9422	19.261	11.3312	8.15172	11.4456
Txnrd2	-0.206207	0.32776	0.999875	59.9941	79.9743	69.2265	82	66.9065	48.1577	77.4413	61.997
Tubb5	-0.206176	0.128636	0.999875	1845.89	1762.45	1667.98	2081.85	1862.74	1798.83	1467.31	1243.75
L3mbtl2	-0.206175	0.172389	0.999875	206.766	191.134	174.002	219.57	187.034	172.801	179.338	146.885
Kiss1r	-0.206049	0.4716	0.999875	41.7816	40.2387	29.0003	35.9174	30.9189	19.8297	48.9103	31.4754
Gadd45b	-0.205994	0.366271	0.999875	76.064	52.8132	56.1296	58.9587	55.2486	59.489	48.9103	45.7824
Gm13889	-0.205988	0.279259	0.999875	114.632	100.597	120.211	89.4546	99.8529	65.1546	110.048	90.6109
Kri1	-0.205904	0.210385	0.999875	136.058	116.189	132.372	136.215	117.593	93.4827	105.972	121.133
NA	-0.205777	0.435387	0.999875	64.2794	57.8431	43.9682	35.2397	45.1112	45.3249	40.7586	41.0134
4921507P07Rik	-0.205715	0.722624	0.999875	3.21397	7.04177	10.7582	15.5868	9.63049	5.66562	8.15172	7.6304
Cnbd2	-0.205534	0.297366	0.999875	81.4206	73.4356	70.162	69.8017	66.3997	62.3218	65.2137	60.0894
Fbxo10	-0.205463	0.204598	0.999875	252.832	273.12	198.792	252.777	241.269	181.3	248.627	178.36
Slc9a3r2	-0.205456	0.221234	0.999875	133.915	134.297	115.533	122.661	107.456	113.312	81.5172	123.04
Asb6	-0.205437	0.176386	0.999875	148.914	147.877	151.55	157.223	142.43	107.647	146.731	124.948
Ypel1	-0.205375	0.337844	0.999875	71.7787	68.4057	95.888	95.5537	82.6194	67.9874	73.3655	61.997
Zfp78	-0.205279	0.438408	0.999875	39.639	42.7536	44.4359	56.2479	40.0425	31.1609	28.531	49.5976
Mfhas1	-0.205217	0.163372	0.999875	183.196	180.571	157.631	172.81	162.198	155.804	130.427	142.116
Slc38a3	-0.204992	0.165468	0.999875	421.03	649.351	451.375	453.372	423.235	433.42	419.813	439.702
Plekha7	-0.204843	0.197699	0.999875	182.125	214.774	203.937	199.917	162.198	158.637	138.579	218.42
Fam212b	-0.204842	0.295931	0.999875	397.461	228.857	484.585	420.843	300.066	337.104	383.131	320.477
H2-T22	-0.20478	0.239668	0.999875	166.055	202.199	157.631	133.504	128.744	158.637	130.427	156.423
Ahdc1	-0.204649	0.208416	0.999875	236.763	179.062	170.727	215.504	189.062	184.133	171.186	147.839
Tctn2	-0.204568	0.271212	0.999875	128.559	135.805	129.566	168.744	146.992	130.309	85.593	108.733
Apba3	-0.204244	0.28653	0.999875	110.346	102.106	87.9363	80.6446	85.6606	65.1546	89.6689	84.8881
Rtl6	-0.204109	0.209551	0.999875	277.473	203.205	243.228	235.835	212.378	226.625	252.703	160.238
Dmkn	-0.203959	0.505636	0.999875	69.6361	44.7655	133.775	74.5455	82.6194	45.3249	77.4413	71.535
Gng13	-0.20385	0.40344	0.999875	76.064	54.3222	53.3231	53.5372	52.7142	50.9905	28.531	59.1356
Lamc3	-0.20378	0.65137	0.999875	9.64192	12.5746	14.9679	12.1983	9.63049	11.3312	8.15172	13.3532
9430021M05Rik	-0.203755	0.550553	0.999875	27.8544	25.1492	23.3873	21.686	15.206	28.3281	16.3034	26.7064
B230216N24Rik	-0.203746	0.46357	0.999875	48.2096	43.7595	76.2427	42.6942	36.4945	48.1577	52.9862	52.459
Adamts10	-0.203662	0.232582	0.999875	113.56	157.937	157.163	130.793	126.21	118.978	110.048	126.855
Cenpl	-0.203513	0.622279	0.999875	17.1412	12.0716	18.2421	16.9422	15.206	5.66562	24.4552	12.3994
Rpl18	-0.203437	0.127217	0.999875	1085.25	1145.8	918.654	897.256	1053.27	869.672	725.503	831.713
Lrp3	-0.20324	0.125722	0.999875	304.256	331.466	314.793	256.843	257.489	257.786	301.614	248.942
Gpr151	-0.203142	0.670676	0.999875	27.8544	15.5925	6.54845	17.6198	17.2335	11.3312	16.3034	11.4456
Trib1	-0.203117	0.346814	0.999875	62.1368	69.4117	71.5652	81.3223	66.3997	56.6562	40.7586	69.6274
Grik5	-0.202985	0.132774	0.999875	977.047	704.177	926.138	866.761	677.682	711.035	933.372	724.888
Gm11766	-0.202836	0.540108	0.999875	33.211	36.2148	75.7749	30.4959	40.0425	42.4921	40.7586	33.383
Syngr3	-0.202771	0.132846	0.999875	505.665	520.085	425.181	504.876	463.277	470.246	436.117	338.599
Strada	-0.202598	0.130595	0.999875	239.977	224.331	261.003	238.546	190.075	203.962	236.4	221.281
Hk1	-0.202587	0.145182	0.999875	1278.09	1120.14	901.815	1198.15	1002.58	1033.97	1112.71	780.208
Rab33a	-0.202551	0.422371	0.999875	102.847	62.8729	59.4038	94.1984	77.0439	73.653	36.6827	73.4426
Irf2bp1	-0.202309	0.21441	0.999875	153.199	150.895	130.501	155.19	133.306	124.644	158.959	107.779
Fbxo41	-0.202174	0.08043	0.999875	428.53	377.237	441.553	469.636	370.013	371.098	383.131	371.028
Lrrc20	-0.202173	0.262586	0.999875	136.058	104.118	111.324	138.248	98.3323	124.644	85.593	112.548
Zfp61	-0.202156	0.253212	0.999875	99.6331	94.5609	102.904	98.2645	92.2499	67.9874	93.7448	84.8881
Has1	-0.202132	0.550499	0.999875	23.5691	22.1313	28.0648	21.0083	22.809	19.8297	12.2276	21.9374
Samsn1	-0.201989	0.573518	0.999875	20.3552	21.1253	21.0486	16.2645	15.7129	16.9968	24.4552	16.2146
Eaf2	-0.201979	0.644053	0.999875	9.64192	18.6104	17.3066	12.1983	13.1786	11.3312	8.15172	15.2608
Vgll4	-0.201906	0.271507	0.999875	169.269	147.374	138.921	137.57	163.211	118.978	110.048	105.872
Gemin7	-0.20189	0.352536	0.999875	96.4192	95.5668	64.549	75.2232	72.4821	65.1546	57.062	82.0267
Rusc1	-0.201853	0.0733647	0.999875	332.11	317.382	332.1	346.975	293.476	291.779	273.083	289.001
Vwa5b1	-0.201728	0.543969	0.999875	49.2809	98.5847	65.0168	129.438	112.525	39.6593	44.8345	83.9343
Lncenc1	-0.201552	0.703814	0.999875	11.7846	10.5626	7.95169	8.13223	8.61675	11.3312	0	9.53799
Irf8	-0.201497	0.40546	0.999875	87.8486	79.9743	79.5169	48.7934	66.3997	82.1514	65.2137	49.5976
Jarid2	-0.201372	0.12811	0.999875	281.758	268.593	337.713	283.273	237.214	274.782	252.703	263.249
Gm13630	-0.201229	0.738458	0.999875	14.9985	13.0776	7.95169	6.77686	9.63049	2.83281	0	17.1684
Dnaaf2	-0.201085	0.444583	0.999875	58.9228	47.7834	47.7101	48.1157	34.9739	31.1609	77.4413	45.7824
Pde4a	-0.200996	0.0905062	0.999875	487.452	416.47	420.036	409.322	352.78	371.098	354.6	417.764
Zcchc10	-0.200869	0.325577	0.999875	77.1353	76.4535	65.0168	88.7769	66.3997	70.8202	52.9862	70.5812
Lrp4	-0.200846	0.182147	0.999875	182.125	205.217	204.873	208.727	204.775	167.136	163.034	151.654
Irf1	-0.200832	0.530269	0.999875	26.7831	57.8431	30.4035	33.8843	36.4945	28.3281	28.531	33.383
Phf13	-0.20082	0.361545	0.999875	86.7772	70.4177	64.0813	78.6116	63.3585	93.4827	57.062	52.459
Gm15777	-0.200772	0.438605	0.999875	38.5677	38.2267	54.2586	46.0827	35.9876	42.4921	32.6069	42.921
Jrk	-0.200706	0.38725	0.999875	43.9243	54.8252	54.2586	57.6033	46.6318	50.9905	52.9862	40.0596
Lin7a	-0.200647	0.151914	0.999875	470.311	552.276	687.119	490.645	508.388	475.912	419.813	497.883
Kcnh7	-0.200645	0.246759	0.999875	535.662	333.478	431.73	553.67	415.125	407.924	301.614	463.546
Tmem132a	-0.200613	0.326064	0.999875	310.684	220.81	311.051	376.793	291.449	209.628	379.055	196.483
Ephx4	-0.200455	0.299093	0.999875	161.77	105.626	166.985	185.008	131.279	121.811	154.883	134.486
Tifab	-0.200377	0.564911	0.999875	28.9257	35.7118	33.21	24.3967	23.3159	42.4921	40.7586	14.307
D030028A08Rik	-0.200332	0.423673	0.999875	59.9941	43.7595	61.2748	45.405	44.6044	59.489	48.9103	37.1982
C1qc	-0.200151	0.289445	0.999875	413.531	469.283	350.342	227.025	318.82	325.773	297.538	325.246
Hist2h3c2	-0.200119	0.721485	0.999875	8.57059	19.6163	11.6937	6.77686	16.7266	5.66562	12.2276	4.769
Gpr135	-0.199973	0.485944	0.999875	58.9228	37.2208	48.1779	36.595	46.6318	50.9905	28.531	27.6602
2010300C02Rik	-0.199905	0.278182	0.999875	1226.67	895.31	1435.51	1146.64	887.019	858.341	1512.14	872.726
Car13	-0.199804	0.640231	0.999875	24.6405	16.5984	14.0324	12.876	13.6854	25.4953	16.3034	8.58419
Pdxk	-0.19979	0.058823	0.999875	1142.03	1151.33	1176.85	1121.57	1112.57	1045.31	994.51	846.974
Egr3	-0.19978	0.460466	0.999875	170.341	90.034	287.196	200.595	139.389	135.975	199.717	182.176
NA	-0.19977	0.145385	0.999875	2904.36	2667.82	2322.36	2057.45	2585.03	1923.48	1850.44	2263.37
Hacl1	-0.19971	0.40458	0.999875	70.7074	114.68	69.6942	91.4876	82.6194	48.1577	69.2896	90.6109
Tbc1d30	-0.199626	0.126966	0.999875	569.944	452.685	628.651	506.909	429.317	495.741	505.407	466.408
Gm40055	-0.199532	0.704409	0.999875	23.5691	9.55668	14.5001	14.9091	4.56181	16.9968	8.15172	23.845
Snupn	-0.199507	0.3023	0.999875	108.204	99.0877	95.4203	78.6116	76.537	87.817	65.2137	95.3799
Rnf10	-0.199365	0.0410568	0.999875	1166.67	1046.21	1065.06	1002.3	1009.68	917.83	896.689	883.218
Bcar3	-0.199361	0.394446	0.999875	89.9912	78.9684	108.985	92.1653	106.442	70.8202	40.7586	81.0729
Ankrd33b	-0.199357	0.355089	0.999875	408.174	225.839	412.085	415.422	245.831	266.284	464.648	317.615
2810029C07Rik	-0.199288	0.423559	0.999875	54.6375	42.7536	74.8394	58.281	50.1799	59.489	44.8345	47.69
Dok5	-0.199025	0.349993	0.999875	104.99	90.537	101.033	114.529	80.592	118.978	118.2	63.9046
Dlg4	-0.199003	0.145267	0.999875	2696.52	2060.22	2840.16	2800.2	2234.27	2178.43	2779.74	1897.11
Cyba	-0.198983	0.579777	0.999875	46.0669	75.9505	37.4197	23.719	54.2348	42.4921	28.531	29.5678
Zfp592	-0.19894	0.175106	0.999875	162.841	167.493	166.985	168.744	149.526	121.811	134.503	159.284
Mrps33	-0.198867	0.123421	0.999875	242.119	246.965	270.825	266.331	240.255	198.297	211.945	227.958
Cfap54	-0.198809	0.496761	0.999875	82.4919	93.5549	100.098	114.529	116.58	50.9905	28.531	117.317
Ppp1r16a	-0.198775	0.172929	0.999875	313.898	267.587	295.148	227.025	253.941	201.129	269.007	234.635
Adamtsl4	-0.198744	0.437649	0.999875	82.4919	101.603	128.63	71.8347	54.2348	101.981	114.124	85.8419
Zc3hc1	-0.198677	0.22416	0.999875	136.058	126.249	125.356	132.149	121.141	133.142	85.593	103.964
Ngrn	-0.198516	0.224374	0.999875	217.479	197.672	188.502	183.653	210.35	133.142	158.959	160.238
Gm2824	-0.198488	0.525402	0.999875	38.5677	32.1909	46.3069	59.6364	51.1936	28.3281	20.3793	40.0596
Fcgr3	-0.198454	0.280612	0.999875	131.773	147.374	134.243	96.2314	116.58	104.814	97.8206	116.364
Piezo1	-0.198277	0.660375	0.999875	6.42794	27.6641	19.6453	19.6529	21.7953	11.3312	16.3034	13.3532
Hhipl1	-0.198192	0.450879	0.999875	43.9243	50.8013	36.4842	45.405	35.4807	56.6562	32.6069	34.3368
Lrmda	-0.198147	0.708895	0.999875	9.64192	15.5925	7.48394	7.45455	6.08241	14.164	8.15172	9.53799
1700109K24Rik	-0.198106	0.550798	0.999875	29.9971	20.6223	36.952	25.7521	20.7816	19.8297	28.531	30.5216
Mafa	-0.198091	0.722139	0.999875	17.1412	6.53878	8.88718	6.77686	9.12362	14.164	4.07586	5.7228
Gm45204	-0.197926	0.692179	0.999875	7.49927	12.0716	12.1614	9.48761	7.09615	5.66562	12.2276	12.3994
Arid4a	-0.197849	0.084828	0.999875	521.735	471.295	543.054	512.331	429.317	518.404	379.055	454.009
1110017D15Rik	-0.197671	0.641387	0.999875	24.6405	21.6283	14.9679	21.0083	26.3571	11.3312	4.07586	18.1222
Arhgef7	-0.197666	0.0726465	0.999875	646.008	624.202	735.297	611.273	529.17	558.063	595.075	609.478
Ap5s1	-0.197634	0.355548	0.999875	92.1339	77.9624	79.0491	77.9339	85.1538	42.4921	69.2896	72.4888
Mboat7	-0.19744	0.0871877	0.999875	628.867	634.765	570.183	712.926	573.774	623.218	501.331	517.913
Slc35f4	-0.197284	0.295543	0.999875	102.847	105.626	87.4686	88.7769	89.7156	67.9874	73.3655	90.6109
Fbxw7	-0.197243	0.1321	0.999875	1131.32	958.686	1250.29	1128.35	977.748	903.666	802.944	1176.99
Mrc1	-0.197229	0.669052	0.999875	11.7846	12.5746	9.82267	16.9422	13.6854	8.49842	8.15172	10.4918
Rasl10b	-0.19719	0.175794	0.999875	2023.73	1542.15	2522.09	1801.29	1629.07	1580.71	2013.47	1676.78
Adcyap1r1	-0.197105	0.170079	0.999875	1350.94	1651.29	1177.79	1343.85	1435.96	1331.42	1018.96	1015.8
Brpf3	-0.197037	0.182247	0.999875	241.048	197.169	268.954	260.909	212.884	186.965	211.945	225.097
Kcng3	-0.197026	0.608666	0.999875	22.4978	21.1253	44.4359	22.3636	16.7266	25.4953	44.8345	21.9374
Rwdd2b	-0.196954	0.355216	0.999875	91.0625	72.4296	71.5652	69.8017	72.989	50.9905	52.9862	72.4888
Sgcz	-0.196953	0.484547	0.999875	41.7816	30.179	40.6939	46.7603	32.4395	50.9905	32.6069	28.614
2024-09-05	-0.196759	0.192288	0.999875	2114.79	1396.28	2013.18	2219.42	1640.73	1620.37	2058.31	1460.27
Fig4	-0.196752	0.128161	0.999875	373.892	380.255	495.343	407.289	376.096	356.934	374.979	343.368
Tmem116	-0.196611	0.445013	0.999875	42.853	49.2924	58.4683	48.1157	51.1936	25.4953	40.7586	46.7362
Ephb3	-0.196433	0.455586	0.999875	57.8515	48.7894	43.5004	63.0248	37.5082	33.9937	77.4413	48.6438
Prr7	-0.196345	0.420058	0.999875	79.278	50.2983	81.3879	65.7356	50.1799	65.1546	85.593	55.3204
Gm19744	-0.196265	0.622964	0.999875	13.9272	21.6283	28.5325	26.4298	23.8228	11.3312	8.15172	26.7064
Lad1	-0.196248	0.670553	0.999875	10.7132	17.1014	12.6292	10.1653	12.1648	8.49842	20.3793	7.6304
Wdpcp	-0.196221	0.410871	0.999875	46.0669	53.8192	60.807	72.5124	56.7692	39.6593	61.1379	46.7362
Glns-ps1	-0.196151	0.67569	0.999875	10.7132	13.0776	13.5646	10.843	13.6854	11.3312	12.2276	5.7228
Dcx	-0.196103	0.220639	0.999875	232.477	271.108	328.358	288.694	274.215	223.792	179.338	273.74
Lag3	-0.196021	0.499207	0.999875	68.5647	70.4177	36.0165	37.2727	45.6181	39.6593	52.9862	46.7362
Dcbld1	-0.195989	0.363103	0.999875	72.85	59.855	65.9522	77.9339	53.2211	73.653	69.2896	56.2742
Zfp516	-0.195891	0.262737	0.999875	122.131	157.434	152.018	139.603	127.731	124.644	167.11	101.103
Dlx2	-0.195886	0.568431	0.999875	28.9257	29.676	32.7422	26.4298	37.0013	14.164	16.3034	23.845
Abhd17a	-0.195849	0.183222	0.999875	461.741	364.16	379.81	328.678	374.575	351.268	338.296	273.74
Ndp	-0.195839	0.459588	0.999875	40.7103	51.8073	51.4521	49.4711	41.5632	33.9937	24.4552	57.228
Acap3	-0.195832	0.163088	0.999875	478.882	393.333	508.908	498.099	363.931	348.435	505.407	440.655
Ocel1	-0.195799	0.347998	0.999875	99.6331	88.0221	115.066	82.6777	90.2225	53.8233	118.2	79.1653
Smap2	-0.195463	0.123141	0.999875	866.701	765.038	726.41	890.48	747.123	688.372	835.551	586.587
Ctu1	-0.195286	0.507423	0.999875	25.7118	48.2864	36.4842	55.5703	37.0013	39.6593	44.8345	30.5216
Sirt6	-0.195212	0.333839	0.999875	69.6361	85.0042	91.6783	76.5785	62.3447	73.653	89.6689	71.535
Aacs	-0.195164	0.288557	0.999875	140.343	135.303	140.792	140.959	139.389	101.981	73.3655	141.162
Ptpn9	-0.195094	0.183614	0.999875	278.544	272.617	240.889	224.992	248.872	246.454	183.414	196.483
Ube2g2	-0.195066	0.121983	0.999875	347.109	346.555	326.487	291.405	288.408	243.621	330.145	288.047
Ulk3	-0.195044	0.258868	0.999875	176.768	154.416	208.615	162.645	127.731	138.808	183.414	175.499
Cap2	-0.194961	0.134517	0.999875	1368.08	1106.56	1503.34	1440.76	1211.41	1096.3	1422.47	1028.2
Plcd3	-0.194701	0.404877	0.999875	51.4236	48.7894	47.2424	52.8595	45.1112	53.8233	36.6827	39.1058
Ntrk1	-0.194658	0.558364	0.999875	40.7103	33.1969	43.9682	42.0165	24.3297	56.6562	57.062	20.9836
Wdtc1	-0.194646	0.133553	0.999875	376.035	326.436	345.665	355.108	300.573	322.94	370.903	260.387
Mcl1	-0.194618	0.142314	0.999875	507.808	567.868	478.037	522.496	444.016	436.252	354.6	547.481
Mchr1	-0.194571	0.295998	0.999875	149.985	114.68	166.518	123.339	133.813	90.6498	126.352	123.994
Cetn4	-0.194565	0.345423	0.999875	92.1339	103.615	87.0008	105.719	104.415	53.8233	81.5172	83.9343
Tubb2b	-0.194452	0.0657128	0.999875	1082.04	1037.65	1042.61	1019.24	1037.56	946.158	782.565	853.65
Tapbp	-0.19437	0.227747	0.999875	142.486	167.493	130.034	155.19	127.224	130.309	154.883	121.133
Pgrmc1	-0.194369	0.0844329	0.999875	1893.03	2191.5	1794.28	2231.62	2020.88	1762.01	1634.42	1648.17
[truncated: 13,973 more rows]

## Sheet: Cerebellum
Gene	log2FoldChange	pvalue	padj	1CW	2CW	3CW	4CW	5CW	6CW	7CW	8CW
AW551984	-4.37174	0.00512197	0.822451	182.142	21.2795	4.37867	1.20613	1.20299	1.98687	6.21595	0
Slc5a7	-4.16623	0.00773637	0.836865	87.053	34.5792	2.43259	1.20613	0	0.993433	0.517995	6.68347
Cbln2	-4.08257	0.0188968	0.866547	95.0886	15.9596	1.45956	0	1.20299	1.32458	3.62597	0
Glra3	-3.73073	0.00439619	0.822451	239.73	42.5591	10.7034	1.20613	4.81197	9.27204	5.17995	2.22782
Tac1	-3.5622	0.00458412	0.822451	144.642	15.9596	3.89215	3.61839	3.60898	1.65572	3.10797	6.68347
Tph2	-3.46918	NA	NA	166.07	5.31988	4.86519	6.03065	7.21795	5.62945	3.10797	0
Gda	-3.16392	NA	NA	101.785	7.97982	1.45956	0	0	4.63602	7.25194	0
Lhx9	-3.12637	0.00434986	0.822451	112.499	23.9395	10.2169	2.41226	2.40598	6.29174	3.62597	4.45565
Nrgn	-2.76788	NA	NA	237.052	5.31988	5.35171	10.8552	13.2329	8.27861	5.69795	11.1391
Hs3st4	-2.66579	NA	NA	77.678	7.97982	2.43259	2.41226	2.40598	0.993433	8.28793	2.22782
Col25a1	-2.64781	0.0197454	0.866547	160.713	21.2795	10.7034	2.41226	10.8269	7.94746	5.69795	6.68347
2900052N01Rik	-2.50183	NA	NA	299.998	18.6196	9.73038	10.8552	6.01496	15.2326	26.9358	11.1391
Baiap3	-2.43309	NA	NA	140.624	13.2997	3.89215	1.20613	7.21795	5.62945	9.84191	6.68347
Cpne4	-2.41509	0.0241187	0.866547	66.9638	2.65994	10.7034	4.82452	2.40598	3.97373	6.73394	2.22782
Sst	-2.37602	0.0787703	0.896453	61.6067	15.9596	3.89215	2.41226	1.20299	1.98687	11.9139	0
Prokr2	-2.37008	0.106351	0.916331	8.03566	66.4985	9.73038	0	2.40598	5.9606	6.73394	0
Gabra5	-2.31844	0.0736416	0.896453	127.231	15.9596	7.29778	1.20613	2.40598	5.29831	17.6118	4.45565
Htr2c	-2.15131	0.0463003	0.866547	405.801	71.8184	34.0563	9.64904	28.8718	17.8818	56.4615	13.3669
Zcchc12	-2.14563	0.0157415	0.866547	573.21	103.738	36.4889	51.8636	38.4957	42.3865	58.0155	33.4174
Mal2	-2.12519	0.0249353	0.866547	140.624	29.2594	13.136	6.03065	10.8269	9.27204	13.9859	8.91129
Scn3a	-2.01459	0.00958332	0.844248	128.571	37.2392	11.6765	19.2981	12.0299	9.93433	13.4679	13.3669
Basp1	-2.01139	0.0218995	0.866547	445.979	90.438	41.8406	33.7717	37.2927	33.7767	57.4975	22.2782
Camkv	-1.97405	NA	NA	204.909	10.6398	12.6495	8.44291	15.6389	12.5835	16.5759	15.5948
B230209E15Rik	-1.97181	0.00771647	0.836865	196.874	55.8588	23.8394	28.9471	13.2329	17.2195	21.2378	26.7339
Vwc2l	-1.96783	0.070073	0.894412	68.3031	7.97982	4.37867	3.61839	8.42094	3.31144	7.25194	2.22782
Itgax	-1.96213	0.0271213	0.866547	16.0713	74.4784	26.272	2.41226	12.0299	5.29831	6.21595	6.68347
Glra2	-1.88729	0.0492012	0.871226	61.6067	21.2795	7.29778	7.23678	12.0299	5.9606	7.25194	0
Gpnmb	-1.86383	0.0119652	0.866547	30.8034	180.876	93.8981	19.2981	32.4808	21.1932	22.7918	11.1391
Rasgrf2	-1.83883	NA	NA	336.158	39.8991	37.9485	19.2981	21.6539	35.4324	22.2738	42.3287
Cybb	-1.8113	0.0612209	0.876606	20.0891	66.4985	29.1911	3.61839	14.4359	7.61632	10.3599	0
Fam19a2	-1.79704	0.0799513	0.896453	112.499	23.9395	4.37867	6.03065	13.2329	9.93433	11.9139	6.68347
Igsf1	-1.75733	0.0313831	0.866547	100.446	21.2795	10.2169	14.4736	16.8419	9.60318	9.84191	6.68347
Dok6	-1.75587	0.00329202	0.747015	56.2496	34.5792	9.24386	8.44291	7.21795	11.2589	7.76993	2.22782
Fam19a1	-1.72015	NA	NA	64.2853	2.65994	3.40563	4.82452	3.60898	4.63602	6.21595	8.91129
4930447C04Rik	-1.68598	0.035957	0.866547	108.481	15.9596	17.0282	16.8858	16.8419	12.9146	13.9859	4.45565
Clec7a	-1.66382	0.000366444	0.597731	33.4819	117.037	49.1384	13.2674	21.6539	15.5638	13.9859	13.3669
Pak6	-1.65794	NA	NA	62.946	2.65994	6.32475	2.41226	3.60898	4.30487	3.62597	13.3669
Scn3b	-1.61772	0.0730282	0.896453	125.892	26.5994	13.6225	6.03065	10.8269	14.5703	15.0219	15.5948
C3	-1.61424	0.0521647	0.874101	46.8747	63.8386	50.598	8.44291	34.8868	5.62945	10.3599	4.45565
Panx1	-1.58806	0.0152838	0.866547	45.5354	10.6398	8.27082	4.82452	4.81197	3.97373	7.76993	6.68347
Ldb2	-1.55988	0.019831	0.866547	49.5532	15.9596	4.37867	8.44291	9.62394	4.96716	8.28793	2.22782
Trerf1	-1.54346	0.085509	0.896453	73.6602	23.9395	14.109	4.82452	2.40598	12.5835	15.0219	8.91129
Gpr26	-1.45948	0.0436268	0.866547	131.249	31.9193	17.5147	21.7104	19.2479	21.1932	20.7198	11.1391
Grem2	-1.45428	0.0240008	0.866547	60.2674	18.6196	6.81126	9.64904	2.40598	6.29174	12.9499	13.3669
Fzd2	-1.44805	0.0607542	0.875565	44.1961	2.65994	11.1899	1.20613	3.60898	7.94746	5.17995	4.45565
Klhl1	-1.4199	0.0698524	0.894412	131.249	37.2392	18.9742	10.8552	18.0449	22.5178	19.1658	13.3669
Lilrb4a	-1.41799	0.0598674	0.874101	8.03566	31.9193	15.5686	1.20613	6.01496	2.64915	9.84191	0
Prlr	-1.41788	0.315151	0.976482	84.3744	37.2392	96.3307	3.61839	30.0748	1.65572	50.7636	0
Rps10-ps2	-1.39134	0.0249411	0.866547	26.7855	7.97982	15.0821	4.82452	2.40598	8.60975	3.10797	6.68347
Enc1	-1.38448	0.0357881	0.866547	186.159	58.5187	35.5159	25.3287	33.6838	22.849	31.5977	28.9617
Arhgdig	-1.38366	0.283086	0.975705	66.9638	2.65994	11.1899	2.41226	6.01496	10.9278	13.9859	0
Miat	-1.38108	0.0701053	0.894412	857.137	188.856	142.55	82.0169	104.66	99.6744	189.068	93.5686
Gbp2	-1.36412	0.000682123	0.597731	28.1248	69.1585	25.299	21.7104	16.8419	12.2523	14.5039	6.68347
Ddc	-1.35916	NA	NA	163.392	15.9596	19.4608	18.092	14.4359	20.8621	26.9358	22.2782
Tcerg1l	-1.35875	0.023776	0.866547	26.7855	21.2795	7.29778	7.23678	9.62394	4.63602	7.25194	0
Pde1a	-1.35363	0.0890097	0.896453	113.838	42.5591	12.6495	10.8552	13.2329	14.9015	23.8278	17.8226
Grm5	-1.35226	0.031086	0.866547	299.998	114.377	58.8688	43.4207	42.1047	48.3471	55.9435	55.6956
Syt16	-1.34735	0.0148308	0.866547	49.5532	15.9596	8.27082	12.0613	8.42094	8.60975	6.21595	11.1391
Zfhx3	-1.34289	0.0787578	0.896453	99.1064	18.6196	16.5416	14.4736	14.4359	9.27204	23.3098	11.1391
Ly9	-1.34285	0.0245476	0.866547	21.4284	23.9395	12.163	3.61839	6.01496	7.28517	6.73394	0
D430019H16Rik	-1.33708	0.171688	0.949956	64.2853	2.65994	10.2169	6.03065	3.60898	7.94746	8.80592	13.3669
St8sia6	-1.33387	0.013491	0.866547	38.839	23.9395	13.6225	7.23678	7.21795	12.5835	5.69795	4.45565
Ndst4	-1.31954	0.110064	0.916924	81.6959	29.2594	9.24386	8.44291	18.0449	9.27204	16.5759	6.68347
A830018L16Rik	-1.31586	0.10776	0.916331	168.749	29.2594	33.0833	13.2674	22.8568	19.5375	39.3677	15.5948
Kctd4	-1.30793	0.0577381	0.874101	104.464	21.2795	26.272	37.39	16.8419	23.1801	29.5257	4.45565
Fyb	-1.30339	0.00322619	0.747015	20.0891	71.8184	34.5428	15.6797	20.4509	12.2523	13.9859	6.68347
Gpr165	-1.29614	0.0448375	0.866547	60.2674	5.31988	7.29778	10.8552	10.8269	9.60318	8.28793	4.45565
Ifi204	-1.29259	0.0375823	0.866547	14.732	39.8991	15.5686	6.03065	2.40598	3.64259	15.5399	6.68347
Neto1	-1.28532	0.0182933	0.866547	68.3031	18.6196	9.73038	16.8858	14.4359	8.94089	15.0219	6.68347
F5	-1.28443	0.470812	0.984149	40.1783	26.5994	21.4068	0	3.60898	0.331144	31.5977	0
Lypd6b	-1.28365	0.0417858	0.866547	52.2318	10.6398	11.6765	3.61839	6.01496	9.60318	8.80592	6.68347
Lyz2	-1.28166	0.0471334	0.866615	125.892	444.21	220.88	55.482	133.532	64.242	92.7212	55.6956
Slc17a6	-1.2808	0.0732553	0.896453	958.922	239.395	161.524	97.6966	125.111	137.756	167.831	169.315
Tmem91	-1.28027	0.0132471	0.866547	91.0708	29.2594	12.163	18.092	12.0299	14.5703	18.6478	15.5948
Gm37694	-1.2628	0.00501947	0.822451	12.0535	18.6196	15.0821	18.092	6.01496	6.29174	6.21595	8.91129
Prkg2	-1.2627	0.0392598	0.866547	30.8034	10.6398	6.81126	9.64904	4.81197	2.64915	8.80592	8.91129
Fhad1	-1.25256	0.0592236	0.874101	49.5532	7.97982	9.73038	6.03065	7.21795	3.31144	13.4679	6.68347
Fcrls	-1.24467	0.00253504	0.747015	53.5711	71.8184	80.2756	18.092	36.0898	15.5638	30.0437	11.1391
Alyref2	-1.24286	0.0267999	0.866547	14.732	21.2795	9.24386	8.44291	2.40598	6.95403	6.73394	2.22782
Gm2237	-1.23925	0.0178501	0.866547	18.7499	5.31988	10.7034	15.6797	4.81197	6.62288	4.14396	6.68347
Gm38372	-1.23537	0.000244298	0.597731	38.839	61.1787	36.0024	33.7717	12.0299	20.8621	11.3959	28.9617
Cd68	-1.23273	0.00105043	0.70934	48.2139	82.4582	51.571	16.8858	24.0598	15.8949	24.3458	17.8226
Evpl	-1.23038	0.0290624	0.866547	34.8212	5.31988	9.24386	12.0613	4.81197	6.29174	8.28793	6.68347
Cbln4	-1.22595	0.393521	0.97921	54.9103	10.6398	1.94608	0	3.60898	4.63602	17.6118	2.22782
Vwc2	-1.22182	0.00560941	0.822451	45.5354	18.6196	17.5147	19.2981	4.81197	13.2458	9.84191	15.5948
Pcbd1	-1.22145	0.0579289	0.874101	36.1605	15.9596	4.86519	6.03065	7.21795	8.60975	6.21595	2.22782
Rab27b	-1.22036	0.0715356	0.894412	222.32	53.1988	35.5159	34.9778	46.9167	31.4587	34.7057	35.6452
Adra1b	-1.21842	0.0332878	0.866547	20.0891	15.9596	12.163	4.82452	3.60898	5.29831	8.80592	2.22782
Lmo3	-1.21839	NA	NA	162.052	15.9596	12.6495	14.4736	19.2479	14.2392	22.2738	33.4174
Ildr2	-1.21713	0.000434342	0.597731	120.535	69.1585	54.4901	31.3594	22.8568	25.4981	34.7057	35.6452
Col4a6	-1.20748	0.0143503	0.866547	12.0535	23.9395	12.6495	13.2674	4.81197	4.63602	6.21595	13.3669
Tmem200a	-1.20475	0.0283064	0.866547	22.7677	7.97982	9.24386	14.4736	4.81197	3.31144	9.32392	6.68347
Ighm	-1.20396	0.00391688	0.816842	46.8747	34.5792	59.3553	14.4736	7.21795	17.5506	21.7558	22.2782
Pcdh18	-1.20001	0.0853655	0.896453	56.2496	10.6398	5.35171	3.61839	10.8269	5.9606	9.32392	6.68347
Ctxn2	-1.19871	0.0305471	0.866547	64.2853	21.2795	13.136	10.8552	8.42094	17.8818	12.9499	4.45565
Stk32c	-1.1942	0.156133	0.949956	107.142	21.2795	18.0012	8.44291	8.42094	15.5638	27.4538	15.5948
Gm12191	-1.18588	0.0570882	0.874101	25.4462	7.97982	12.163	4.82452	1.20299	7.61632	7.25194	4.45565
Pcdh19	-1.18469	0.00563369	0.822451	93.7493	29.2594	24.3259	25.3287	14.4359	18.8752	23.3098	17.8226
Lrrc7	-1.18165	0.0142104	0.866547	38.839	23.9395	12.6495	12.0613	6.01496	7.94746	13.4679	8.91129
Ctxn1	-1.17335	0.0735405	0.896453	36.1605	2.65994	10.2169	6.03065	8.42094	4.96716	8.28793	2.22782
Zdbf2	-1.17208	0.0254549	0.866547	176.784	71.8184	40.3811	43.4207	34.8868	36.757	33.6697	42.3287
Gfra1	-1.171	0.112946	0.917415	113.838	34.5792	22.8664	10.8552	13.2329	15.5638	23.8278	28.9617
A730017C20Rik	-1.16564	NA	NA	208.927	45.219	29.1911	27.741	22.8568	30.1341	45.5836	40.1008
Sncg	-1.15984	0.133651	0.941531	91.0708	26.5994	12.6495	8.44291	16.8419	12.2523	19.1658	13.3669
Nme5	-1.14859	0.0494642	0.871226	18.7499	15.9596	7.29778	12.0613	3.60898	6.29174	9.84191	0
Tcf7l2	-1.14813	0.112389	0.917415	180.802	37.2392	26.7585	26.5349	26.4658	28.8095	23.8278	44.5565
Npr3	-1.12592	0.127116	0.934823	41.5176	5.31988	10.2169	2.41226	4.81197	3.31144	13.9859	4.45565
Timp1	-1.11854	0.0472468	0.866615	9.37493	15.9596	18.0012	4.82452	4.81197	4.63602	4.66196	11.1391
Zfhx4	-1.11395	0.00390263	0.816842	132.588	34.5792	38.435	56.6881	38.4957	36.0947	27.9718	15.5948
Nrp1	-1.11358	0.00255863	0.747015	66.9638	42.5591	36.4889	18.092	20.4509	19.2064	21.2378	11.1391
Npas1	-1.11114	0.0723492	0.896453	30.8034	15.9596	5.35171	10.8552	12.0299	8.94089	5.17995	0
Gm44742	-1.11025	0.0226241	0.866547	24.107	15.9596	8.75734	21.7104	8.42094	10.5966	5.17995	6.68347
Gm13910	-1.10576	0.0431438	0.866547	33.4819	15.9596	17.0282	4.82452	8.42094	12.2523	4.66196	6.68347
Mgat4c	-1.1034	0.0198578	0.866547	87.053	21.2795	18.9742	18.092	16.8419	15.5638	19.1658	15.5948
Gbp5	-1.10308	0.0342407	0.866547	9.37493	26.5994	12.163	18.092	2.40598	7.94746	11.3959	4.45565
Slc6a11	-1.09411	0.116398	0.921877	1410.26	321.853	215.528	188.156	206.915	264.915	305.099	222.782
Chrm2	-1.09154	0.128119	0.936042	164.731	42.5591	22.3799	22.9165	26.4658	27.8161	38.8497	24.5061
Mcf2	-1.08765	0.00623703	0.827554	121.874	58.5187	32.1102	33.7717	16.8419	27.1538	36.7777	33.4174
Ptpn5	-1.08371	0.080002	0.896453	223.659	55.8588	54.0036	65.1311	40.9017	67.8846	56.4615	20.0504
Oprl1	-1.0765	0.0792392	0.896453	198.213	69.1585	39.408	44.6268	21.6539	45.0356	54.3895	44.5565
Capg	-1.073	0.0288205	0.866547	24.107	58.5187	21.8933	8.44291	10.8269	15.2326	16.0579	4.45565
Kcna4	-1.0621	0.0874138	0.896453	41.5176	21.2795	3.89215	9.64904	15.6389	6.29174	7.25194	6.68347
Scn7a	-1.06074	0.0814677	0.896453	34.8212	5.31988	11.6765	4.82452	6.01496	6.62288	9.32392	4.45565
Galnt14	-1.05353	0.0653453	0.88661	48.2139	10.6398	8.27082	9.64904	9.62394	6.95403	11.3959	8.91129
Slc26a7	-1.0499	0.0204417	0.866547	20.0891	15.9596	19.9473	12.0613	6.01496	9.60318	5.17995	15.5948
Cd109	-1.04853	0.0149533	0.866547	20.0891	18.6196	23.8394	15.6797	13.2329	5.29831	10.3599	13.3669
Kcnip2	-1.04575	0.0772935	0.896453	28.1248	13.2997	6.32475	7.23678	3.60898	5.62945	5.69795	13.3669
Palm2	-1.04432	0.027514	0.866547	40.1783	15.9596	14.5956	10.8552	12.0299	8.94089	7.25194	13.3669
Cpa2	-1.04316	0.0208795	0.866547	26.7855	13.2997	15.5686	15.6797	7.21795	7.61632	12.9499	4.45565
9330132A10Rik	-1.03707	0.0433688	0.866547	178.124	74.4784	41.3541	47.0391	40.9017	46.3602	43.5116	33.4174
Kcnj2	-1.03682	0.0054377	0.822451	60.2674	37.2392	25.299	19.2981	16.8419	15.5638	19.1658	15.5948
6330403K07Rik	-1.03452	0.0658346	0.88661	507.586	231.415	99.2498	124.231	104.66	128.815	153.327	80.2017
H2-Aa	-1.0298	0.0747307	0.896453	14.732	26.5994	10.7034	2.41226	6.01496	5.29831	5.69795	8.91129
Nnat	-1.02851	0.0266733	0.866547	804.905	489.429	249.584	214.691	164.81	207.959	249.674	238.377
Bend7	-1.02578	0.0679546	0.894412	18.7499	13.2997	7.7843	10.8552	8.42094	8.27861	4.66196	0
Samd9l	-1.0242	0.00314315	0.747015	52.2318	45.219	33.5698	20.5042	20.4509	17.8818	21.7558	8.91129
Car12	-1.02237	0.290824	0.976482	42.8568	21.2795	24.8125	3.61839	10.8269	1.98687	27.4538	4.45565
Fbxw23	-1.02143	0.0750544	0.896453	26.7855	5.31988	9.24386	10.8552	9.62394	4.96716	3.62597	11.1391
Pak3	-1.01853	0.0444789	0.866547	668.299	212.795	168.822	165.24	151.577	156.962	144.003	147.036
4930452B06Rik	-1.01797	0.0537313	0.874101	25.4462	13.2997	9.73038	10.8552	4.81197	8.94089	9.32392	2.22782
Klhl6	-1.01677	0.0532157	0.874101	5.35711	34.5792	11.6765	13.2674	7.21795	6.62288	8.28793	6.68347
Nhs	-1.0119	0.0463185	0.866547	72.3209	47.8789	15.0821	8.44291	14.4359	14.9015	18.6478	22.2782
A330102I10Rik	-1.00628	0.0341551	0.866547	30.8034	15.9596	13.136	15.6797	3.60898	12.2523	11.3959	6.68347
Gm5441	-1.00084	0.0339193	0.866547	14.732	13.2997	14.109	13.2674	7.21795	5.9606	5.17995	13.3669
Fmo2	-0.999605	0.0809036	0.896453	9.37493	58.5187	8.27082	13.2674	14.4359	8.27861	7.76993	11.1391
Cd52	-0.999336	0.0339591	0.866547	21.4284	18.6196	21.8933	6.03065	9.62394	9.93433	7.25194	6.68347
Gabrg3	-0.998486	0.134071	0.943084	33.4819	10.6398	7.29778	2.41226	6.01496	5.62945	4.14396	13.3669
Rap2b	-0.998112	0.00502496	0.822451	53.5711	61.1787	24.3259	28.9471	20.4509	14.2392	23.3098	24.5061
Mpeg1	-0.997434	0.0116158	0.866547	328.123	505.389	292.884	133.88	198.494	128.484	152.809	149.264
S1pr3	-0.988565	0.0468654	0.866615	17.4106	45.219	17.5147	9.64904	10.8269	16.2261	6.21595	6.68347
Gm44667	-0.987961	0.040781	0.866547	10.7142	21.2795	13.6225	24.1226	8.42094	12.5835	7.25194	2.22782
Rps16-ps2	-0.98791	0.0618068	0.878428	48.2139	10.6398	14.5956	12.0613	8.42094	12.2523	5.69795	20.0504
Lbp	-0.985778	0.0870952	0.896453	25.4462	7.97982	13.6225	7.23678	4.81197	4.30487	12.9499	4.45565
Resp18	-0.985747	0.088766	0.896453	399.104	103.738	78.8161	96.4904	90.2244	90.0712	96.3472	64.6069
Gabra3	-0.983565	0.0982514	0.905368	349.551	82.4582	78.8161	67.5433	68.5705	70.2026	86.5052	66.8347
Kcnc2	-0.980342	0.20042	0.954063	222.32	53.1988	41.8406	16.8858	45.7137	28.1473	47.1376	49.0121
Mpped1	-0.978958	0.0821802	0.896453	77.678	15.9596	11.6765	14.4736	15.6389	19.2064	18.1298	4.45565
B230334C09Rik	-0.978169	0.131889	0.938381	167.41	34.5792	31.1372	36.1839	31.2778	27.1538	29.0077	51.2399
Chrna7	-0.974792	0.00442723	0.822451	66.9638	45.219	27.2451	32.5655	16.8419	25.4981	23.3098	15.5948
H2-Q4	-0.973314	0.00270385	0.747015	37.4997	45.219	25.299	30.1533	14.4359	16.5572	20.2018	13.3669
Chek2	-0.97243	0.0956842	0.903394	13.3928	18.6196	9.73038	7.23678	3.60898	6.95403	9.32392	0
Pcdh11x	-0.971907	0.0310687	0.866547	92.4101	42.5591	19.9473	20.5042	30.0748	17.8818	25.3818	13.3669
Serpina3n	-0.969935	0.116295	0.92184	92.4101	103.738	54.9766	21.7104	45.7137	26.1604	52.8355	11.1391
Bdh2	-0.969058	0.0858211	0.896453	16.0713	10.6398	13.6225	9.64904	3.60898	9.60318	8.28793	0
Slit2	-0.967726	0.0408841	0.866547	91.0708	23.9395	22.8664	15.6797	20.4509	17.5506	25.3818	13.3669
Otof	-0.967544	0.0282754	0.866547	44.1961	18.6196	18.4877	12.0613	13.2329	8.94089	14.5039	11.1391
Gpr34	-0.96563	0.000174765	0.597731	57.5889	77.1383	57.4092	49.4514	37.2927	28.1473	34.7057	15.5948
Lpl	-0.964951	0.0504413	0.871226	29.4641	69.1585	40.8676	6.03065	24.0598	10.2655	22.7918	15.5948
Tnfsf10	-0.958964	0.063565	0.882522	6.69638	21.2795	9.24386	20.5042	7.21795	8.60975	6.21595	4.45565
Cd84	-0.958755	0.00792818	0.836865	38.839	47.8789	37.462	20.5042	26.4658	10.5966	20.7198	17.8226
Celf6	-0.957232	0.0338649	0.866547	65.6245	23.9395	17.0282	19.2981	13.2329	19.8687	18.6478	8.91129
Slc47a1	-0.952626	0.0449286	0.866547	33.4819	10.6398	30.6507	7.23678	12.0299	9.60318	10.8779	13.3669
Mme	-0.951285	0.0596003	0.874101	77.678	34.5792	17.0282	10.8552	25.2628	14.9015	20.7198	8.91129
Tlr2	-0.950161	0.0461134	0.866547	38.839	42.5591	23.3529	4.82452	15.6389	12.5835	16.0579	8.91129
Ly6h	-0.94848	0.116971	0.922558	149.999	45.219	22.8664	37.39	33.6838	34.7701	32.1157	31.1895
Fam111a	-0.946828	0.0805315	0.896453	20.0891	13.2997	8.75734	8.44291	12.0299	5.62945	5.17995	2.22782
Cpxm2	-0.946269	0.0510511	0.874101	14.732	13.2997	13.6225	8.44291	6.01496	5.62945	7.76993	6.68347
Dpp4	-0.945698	0.0211171	0.866547	21.4284	15.9596	20.9203	14.4736	10.8269	10.9278	6.73394	11.1391
Nsun7	-0.935424	0.0355842	0.866547	40.1783	18.6196	10.2169	24.1226	9.62394	11.59	11.9139	15.5948
Capn3	-0.935102	0.0187547	0.866547	25.4462	23.9395	22.8664	13.2674	7.21795	12.2523	13.4679	8.91129
Efcc1	-0.933524	0.178133	0.950531	22.7677	7.97982	10.2169	3.61839	0	4.30487	10.3599	8.91129
Slc4a5	-0.925846	0.0659883	0.886651	32.1426	15.9596	22.8664	10.8552	7.21795	5.62945	20.7198	8.91129
Adcyap1	-0.925385	0.0378673	0.866547	104.464	47.8789	20.9203	28.9471	14.4359	21.5244	27.9718	44.5565
Cd300c2	-0.925157	0.0570809	0.874101	22.7677	34.5792	14.109	7.23678	6.01496	10.9278	12.4319	6.68347
Gm7292	-0.914648	0.101131	0.906692	29.4641	7.97982	11.1899	6.03065	6.01496	9.93433	5.69795	6.68347
Fbn1	-0.913938	0.0275388	0.866547	36.1605	23.9395	17.5147	14.4736	8.42094	9.60318	12.9499	20.0504
Lpar4	-0.911435	0.0693593	0.894412	9.37493	13.2997	11.6765	12.0613	7.21795	4.30487	7.25194	6.68347
Tekt5	-0.911198	0.138759	0.946939	34.8212	2.65994	11.6765	6.03065	4.81197	6.95403	10.8779	6.68347
Katnal2	-0.910011	0.0257614	0.866547	24.107	21.2795	20.9203	12.0613	7.21795	10.5966	12.9499	8.91129
Rsph4a	-0.908461	0.0955244	0.903394	24.107	7.97982	10.7034	8.44291	6.01496	4.96716	10.8779	4.45565
Col11a1	-0.906298	0.0825072	0.896453	80.3566	13.2997	18.4877	10.8552	14.4359	17.2195	18.1298	15.5948
Cd86	-0.905189	0.0540927	0.874101	16.0713	18.6196	11.1899	14.4736	9.62394	9.60318	6.73394	2.22782
Shroom4	-0.904631	0.0761433	0.896453	10.7142	21.2795	13.136	15.6797	9.62394	11.59	6.21595	0
Smim17	-0.900162	0.0218129	0.866547	155.356	53.1988	35.5159	45.833	45.7137	29.1407	32.6337	51.2399
Qpct	-0.8991	0.0956758	0.903394	77.678	31.9193	13.6225	7.23678	19.2479	18.2129	18.6478	11.1391
Cacna1h	-0.893633	0.129911	0.938381	37.4997	15.9596	7.7843	4.82452	12.0299	7.94746	5.17995	11.1391
Drc3	-0.891155	0.0134583	0.866547	49.5532	37.2392	28.2181	19.2981	18.0449	21.8555	17.6118	8.91129
Zdhhc22	-0.890555	0.228902	0.961301	29.4641	7.97982	7.29778	2.41226	9.62394	3.31144	10.8779	0
4930578M01Rik	-0.887035	0.108537	0.916331	13.3928	18.6196	10.7034	4.82452	4.81197	6.95403	7.76993	2.22782
Fam46c	-0.886232	0.0703068	0.894412	18.7499	58.5187	23.8394	6.03065	14.4359	10.5966	16.0579	13.3669
Gm9493	-0.884313	0.218518	0.957959	36.1605	5.31988	12.163	2.41226	3.60898	14.9015	7.25194	2.22782
Il13ra1	-0.879089	0.0194751	0.866547	34.8212	26.5994	19.9473	16.8858	12.0299	14.9015	13.4679	8.91129
Dse	-0.877042	0.0244051	0.866547	20.0891	34.5792	15.5686	21.7104	9.62394	12.9146	9.84191	15.5948
Gm29514	-0.875264	0.0367677	0.866547	25.4462	23.9395	12.6495	20.5042	12.0299	9.60318	7.76993	17.8226
Cd163	-0.875182	0.0881871	0.896453	18.7499	18.6196	10.7034	7.23678	10.8269	4.63602	8.80592	4.45565
Vstm2b	-0.874788	0.17831	0.950531	40.1783	2.65994	4.86519	9.64904	8.42094	6.95403	7.76993	8.91129
Slc15a3	-0.87438	0.0789177	0.896453	16.0713	13.2997	13.136	7.23678	6.01496	6.29174	8.80592	4.45565
Rpl3-ps1	-0.873194	0.0436537	0.866547	112.499	37.2392	45.7328	21.7104	15.6389	46.3602	23.8278	31.1895
Dclk3	-0.872757	0.0366062	0.866547	40.1783	15.9596	16.5416	16.8858	16.8419	10.9278	11.9139	8.91129
Epb41l4a	-0.868807	0.128554	0.937769	41.5176	21.2795	10.2169	3.61839	14.4359	10.2655	8.80592	6.68347
Spi1	-0.866117	0.11439	0.919451	16.0713	13.2997	11.1899	9.64904	2.40598	7.94746	10.8779	2.22782
Cyth4	-0.861871	0.0284358	0.866547	34.8212	61.1787	37.9485	13.2674	22.8568	14.5703	25.8998	13.3669
Gm10073	-0.857786	0.111213	0.916924	21.4284	13.2997	11.1899	4.82452	4.81197	7.94746	8.28793	4.45565
Gm9385	-0.85774	0.2662	0.971476	36.1605	0	11.1899	2.41226	4.81197	12.9146	4.66196	4.45565
Vwa5b1	-0.857331	0.121913	0.931031	44.1961	13.2997	5.35171	14.4736	12.0299	10.2655	10.3599	8.91129
Nat1	-0.85482	0.116791	0.921877	13.3928	7.97982	15.0821	4.82452	7.21795	5.29831	5.69795	6.68347
Igfbp4	-0.853331	0.00772278	0.836865	38.839	87.7781	41.3541	28.9471	27.6688	23.1801	23.8278	31.1895
Dctd	-0.852635	0.053794	0.874101	24.107	21.2795	9.24386	22.9165	12.0299	9.60318	11.3959	6.68347
A930015D03Rik	-0.852037	0.0854111	0.896453	14.732	13.2997	12.6495	13.2674	2.40598	10.9278	6.21595	8.91129
Tshz2	-0.850725	0.230164	0.961301	41.5176	5.31988	3.89215	4.82452	10.8269	4.30487	7.76993	8.91129
Rasal3	-0.847898	0.0401016	0.866547	16.0713	21.2795	18.0012	13.2674	12.0299	8.60975	7.76993	11.1391
Cdh24	-0.847141	0.0733173	0.896453	24.107	7.97982	10.7034	15.6797	6.01496	9.60318	7.76993	8.91129
Cfap65	-0.847102	0.0996247	0.905368	41.5176	18.6196	15.5686	8.44291	9.62394	6.95403	19.6838	8.91129
Gm15501	-0.846919	0.119058	0.925748	32.1426	13.2997	15.5686	3.61839	6.01496	11.59	7.25194	11.1391
Zfp141	-0.846863	0.0112955	0.866547	79.0173	37.2392	36.4889	36.1839	38.4957	27.1538	19.1658	20.0504
Crnde	-0.845925	0.0768044	0.896453	28.1248	21.2795	11.6765	8.44291	6.01496	9.27204	8.28793	15.5948
Slc5a5	-0.845153	0.118317	0.924739	46.8747	26.5994	12.163	7.23678	21.6539	7.61632	8.28793	15.5948
Angpt2	-0.842618	0.10676	0.916331	5.35711	21.2795	16.0551	8.44291	4.81197	6.62288	6.73394	11.1391
Fnbp1l	-0.83822	0.0497349	0.871226	472.765	218.115	133.793	160.415	134.735	117.225	155.917	142.581
Cxcl10	-0.838014	0.213304	0.957326	6.69638	45.219	11.6765	4.82452	4.81197	5.29831	18.6478	4.45565
Gm43205	-0.836625	0.117751	0.924156	14.732	2.65994	9.73038	19.2981	6.01496	8.27861	4.66196	8.91129
Gm17655	-0.835745	0.0610027	0.876606	16.0713	37.2392	16.0551	14.4736	18.0449	7.94746	7.76993	13.3669
Myoc	-0.834904	0.278489	0.975338	96.4279	23.9395	10.7034	14.4736	22.8568	12.9146	16.0579	31.1895
Rpl19-ps11	-0.833206	0.07642	0.896453	26.7855	13.2997	20.4338	10.8552	3.60898	14.2392	11.3959	8.91129
Rpp25	-0.83065	0.0853355	0.896453	53.5711	13.2997	12.163	15.6797	13.2329	12.9146	10.8779	17.8226
Abca6	-0.830615	0.0436281	0.866547	29.4641	18.6196	22.3799	14.4736	19.2479	9.60318	13.4679	4.45565
Fgl2	-0.830094	0.0254488	0.866547	33.4819	26.5994	19.9473	27.741	10.8269	11.9212	13.9859	28.9617
Gbp3	-0.823957	0.0168852	0.866547	62.946	61.1787	33.5698	22.9165	18.0449	23.1801	32.6337	22.2782
Zfp354b	-0.823217	0.00992708	0.844248	49.5532	34.5792	32.5968	30.1533	22.8568	24.8358	20.2018	8.91129
Gm46218	-0.82268	0.0991429	0.905368	14.732	5.31988	12.163	16.8858	4.81197	8.94089	5.17995	11.1391
Ifit2	-0.82212	0.00364686	0.795632	148.66	98.4178	68.1126	60.3065	39.6987	52.9831	66.3034	46.7843
Gm15764	-0.820715	0.0956231	0.903394	5.35711	21.2795	11.1899	18.092	7.21795	7.28517	7.25194	8.91129
2024-03-01	-0.820695	0.0445105	0.866547	108.481	29.2594	26.7585	36.1839	37.2927	24.5047	21.2378	33.4174
Meis2	-0.82014	0.238279	0.96139	178.124	42.5591	36.0024	20.5042	38.4957	32.7833	51.7995	33.4174
Cdh13	-0.818436	0.22853	0.961301	121.874	23.9395	21.4068	20.5042	19.2479	29.1407	29.0077	28.9617
NA	-0.816537	0.0360627	0.866547	37.4997	26.5994	15.0821	31.3594	20.4509	16.5572	14.5039	6.68347
Tyrobp	-0.815954	0.00635195	0.827554	54.9103	74.4784	59.3553	28.9471	37.2927	27.485	35.2237	17.8226
Foxj1	-0.81252	0.0379964	0.866547	69.6424	34.5792	37.462	15.6797	22.8568	24.5047	26.9358	11.1391
Kcnh7	-0.811233	0.0100778	0.844248	188.838	90.438	72.4913	56.6881	67.3675	63.5797	56.9795	40.1008
Arhgap18	-0.81086	0.0435893	0.866547	54.9103	45.219	21.8933	15.6797	21.6539	16.5572	23.8278	11.1391
Igf1	-0.808203	0.000804144	0.597731	53.5711	47.8789	52.0575	53.0697	22.8568	31.4587	30.5617	33.4174
Tlr7	-0.807048	0.0343706	0.866547	17.4106	26.5994	22.3799	14.4736	12.0299	10.5966	11.9139	11.1391
Trpc4	-0.806003	0.141012	0.948172	32.1426	5.31988	8.27082	13.2674	13.2329	7.61632	5.69795	8.91129
Gpsm3	-0.80382	0.109887	0.916924	12.0535	21.2795	11.6765	8.44291	7.21795	4.63602	10.3599	6.68347
Col6a2	-0.803808	0.157147	0.949956	13.3928	7.97982	14.109	9.64904	13.2329	6.62288	2.07198	6.68347
Car5b	-0.803057	0.119242	0.925748	8.03566	29.2594	10.7034	14.4736	8.42094	11.2589	7.76993	2.22782
Pnma2	-0.802531	0.0556478	0.874101	65.6245	31.9193	23.3529	14.4736	14.4359	15.8949	24.3458	22.2782
NA	-0.802405	0.131932	0.938381	10.7142	10.6398	10.2169	12.0613	10.8269	6.95403	3.10797	4.45565
Il10rb	-0.800789	0.0225738	0.866547	33.4819	31.9193	24.3259	24.1226	10.8269	19.5375	11.3959	24.5061
St8sia4	-0.796414	0.0364149	0.866547	111.16	47.8789	40.8676	22.9165	33.6838	37.0882	25.3818	31.1895
Ptprc	-0.795102	0.0138254	0.866547	34.8212	66.4985	54.0036	33.7717	42.1047	17.8818	25.8998	24.5061
Gm2885	-0.794442	0.0920796	0.899564	13.3928	7.97982	13.136	15.6797	10.8269	6.95403	7.25194	4.45565
Agbl4	-0.793023	0.201548	0.954787	36.1605	15.9596	6.81126	2.41226	7.21795	9.60318	8.28793	8.91129
Anxa2	-0.792501	0.00839478	0.838674	61.6067	85.1181	56.4362	32.5655	28.8718	42.7176	33.6697	20.0504
Slc16a12	-0.791236	0.0704769	0.894412	24.107	10.6398	14.109	13.2674	7.21795	9.60318	9.84191	8.91129
Igsf10	-0.790659	0.0367297	0.866547	32.1426	18.6196	22.3799	31.3594	15.6389	21.8555	10.8779	8.91129
Kcnb2	-0.790245	0.00707068	0.836865	101.785	39.8991	54.9766	47.0391	28.8718	42.7176	34.7057	33.4174
Rgs9	-0.787945	0.0255569	0.866547	52.2318	31.9193	22.8664	21.7104	21.6539	17.5506	16.5759	17.8226
Cdk2	-0.787549	0.110699	0.916924	16.0713	18.6196	7.7843	16.8858	13.2329	8.60975	5.69795	4.45565
Eif4a-ps4	-0.787422	0.112242	0.917415	65.6245	13.2997	32.5968	14.4736	16.8419	29.4718	7.76993	20.0504
Fmo1	-0.785747	0.0337642	0.866547	41.5176	31.9193	23.3529	16.8858	9.62394	15.8949	16.5759	24.5061
Vstm5	-0.784181	0.218852	0.957959	29.4641	15.9596	5.35171	4.82452	2.40598	6.62288	12.4319	8.91129
Kif24	-0.783741	0.0307333	0.866547	22.7677	21.2795	21.8933	33.7717	13.2329	18.5441	10.3599	15.5948
Pcdh7	-0.783732	0.0563536	0.874101	317.408	114.377	102.655	126.644	98.6453	91.3958	112.405	80.2017
Tpd52l1	-0.782198	0.251729	0.967943	96.4279	29.2594	18.0012	14.4736	16.8419	15.5638	29.0077	31.1895
Gm44164	-0.780582	0.0205146	0.866547	24.107	29.2594	26.7585	21.7104	12.0299	16.5572	12.9499	17.8226
F8	-0.780244	0.0501546	0.871226	28.1248	29.2594	13.136	20.5042	14.4359	14.2392	10.8779	8.91129
Gm27000	-0.77954	0.289207	0.976079	25.4462	2.65994	15.5686	3.61839	1.20299	10.9278	2.58998	15.5948
Ifi203	-0.779083	0.0182962	0.866547	25.4462	58.5187	32.1102	31.3594	16.8419	26.4915	17.6118	17.8226
Thbd	-0.778927	0.0729078	0.896453	26.7855	45.219	31.6237	7.23678	10.8269	19.5375	16.5759	13.3669
Gm43843	-0.778308	0.00577178	0.822451	46.8747	39.8991	37.462	38.5962	30.0748	22.1867	18.1298	28.9617
Pon3	-0.778284	0.0401232	0.866547	25.4462	37.2392	21.4068	16.8858	19.2479	11.59	16.5759	6.68347
Osmr	-0.776732	0.161326	0.949956	6.69638	63.8386	20.4338	10.8552	24.0598	9.60318	11.3959	11.1391
Gm26779	-0.776225	0.0241645	0.866547	20.0891	31.9193	26.7585	21.7104	13.2329	14.5703	16.5759	11.1391
Kcnq5	-0.774598	0.191523	0.952987	33.4819	15.9596	9.73038	3.61839	14.4359	5.62945	10.8779	4.45565
Adgre1	-0.773661	0.0408874	0.866547	36.1605	85.1181	29.1911	28.9471	38.4957	26.1604	17.6118	15.5948
Cobl	-0.771789	0.0242382	0.866547	50.8925	37.2392	33.0833	16.8858	24.0598	20.5309	18.6478	15.5948
Rcn1	-0.770894	0.0130077	0.866547	105.803	50.5389	42.3271	45.833	36.0898	33.4456	42.9936	26.7339
Stxbp6	-0.770674	0.164881	0.949956	230.356	66.4985	61.3014	44.6268	66.1646	55.6322	62.6774	51.2399
Gm25772	-0.769878	0.142659	0.94857	9.37493	7.97982	11.6765	14.4736	10.8269	4.30487	5.17995	8.91129
Ifit1	-0.768436	0.0581612	0.874101	89.7315	82.4582	55.9497	21.7104	27.6688	29.1407	64.7494	17.8226
Gm973	-0.768306	0.111779	0.917325	53.5711	31.9193	18.4877	7.23678	12.0299	15.8949	22.2738	11.1391
Gpx3	-0.767928	0.287635	0.976079	49.5532	159.596	36.4889	25.3287	30.0748	23.8424	78.7353	22.2782
Eln	-0.766162	0.0551845	0.874101	36.1605	23.9395	14.5956	18.092	12.0299	11.9212	11.9139	20.0504
Nexmif	-0.765579	0.00801016	0.836865	180.802	58.5187	79.3026	83.223	63.7586	66.56	48.1736	60.1512
Tmem253	-0.764755	0.0886018	0.896453	14.732	15.9596	11.1899	19.2981	12.0299	6.29174	8.28793	11.1391
Mrap2	-0.764408	0.100204	0.905368	65.6245	18.6196	21.8933	12.0613	15.6389	17.2195	23.3098	11.1391
Pde1b	-0.764394	0.149895	0.948886	279.909	101.078	71.0318	67.5433	54.1346	96.363	84.4333	69.0625
Gm27544	-0.759894	0.12954	0.938381	22.7677	21.2795	10.7034	6.03065	8.42094	8.60975	10.3599	4.45565
Necab2	-0.759824	0.266165	0.971476	41.5176	10.6398	4.37867	7.23678	2.40598	7.61632	17.0938	8.91129
Arhgap45	-0.758672	0.0583883	0.874101	21.4284	37.2392	24.3259	13.2674	19.2479	14.9015	12.9499	4.45565
Bmper	-0.758648	0.131029	0.938381	14.732	10.6398	17.0282	10.8552	2.40598	10.9278	9.84191	6.68347
Gm4149	-0.7585	0.245086	0.963218	30.8034	5.31988	11.6765	8.44291	3.60898	13.9081	2.07198	15.5948
Pam	-0.758126	0.0857318	0.896453	558.478	231.415	181.958	154.385	141.953	173.188	191.14	158.175
Gm9801	-0.757792	0.063065	0.882522	28.1248	29.2594	13.6225	18.092	8.42094	14.9015	9.84191	17.8226
Gm15487	-0.757383	0.2027	0.954787	32.1426	7.97982	22.3799	9.64904	1.20299	19.8687	6.73394	15.5948
Gm28756	-0.751663	0.156935	0.949956	6.69638	10.6398	8.27082	20.5042	8.42094	6.29174	7.25194	4.45565
C1qa	-0.750776	0.1216	0.930686	198.213	367.072	209.69	85.6353	164.81	94.3761	169.903	77.9738
Col3a1	-0.750466	0.134871	0.943101	14.732	5.31988	15.0821	12.0613	6.01496	10.2655	5.69795	6.68347
Tubb6	-0.750291	0.053713	0.874101	38.839	42.5591	30.6507	14.4736	10.8269	23.8424	22.2738	11.1391
Slc18a2	-0.748879	0.0920061	0.899564	93.7493	34.5792	19.4608	18.092	25.2628	23.5112	24.3458	24.5061
Rsph3b	-0.747957	0.128439	0.937411	22.7677	18.6196	10.2169	7.23678	6.01496	9.93433	6.73394	11.1391
Tnxb	-0.747255	0.0827505	0.896453	34.8212	21.2795	23.8394	8.44291	15.6389	16.2261	10.3599	8.91129
Gm26945	-0.747209	0.115794	0.92184	29.4641	26.5994	17.0282	27.741	20.4509	10.2655	4.66196	31.1895
Aldob	-0.747193	0.140687	0.948172	22.7677	15.9596	13.6225	19.2981	0	12.5835	12.4319	17.8226
Irf8	-0.742746	0.0765258	0.896453	33.4819	50.5389	23.3529	10.8552	22.8568	11.2589	19.6838	13.3669
Kcnk6	-0.742639	0.168021	0.949956	12.0535	29.2594	7.29778	9.64904	10.8269	4.63602	7.25194	11.1391
Bend4	-0.741864	0.0450063	0.866547	48.2139	34.5792	18.9742	24.1226	14.4359	14.5703	20.2018	26.7339
Tagln2	-0.741252	0.145285	0.94857	12.0535	10.6398	10.7034	12.0613	6.01496	9.60318	4.14396	6.68347
Rsph9	-0.740998	0.0961908	0.904138	40.1783	21.2795	18.9742	9.64904	20.4509	12.5835	12.4319	6.68347
Fras1	-0.740114	0.0551519	0.874101	40.1783	15.9596	19.9473	18.092	10.8269	13.9081	13.9859	20.0504
Slc2a12	-0.739496	0.15421	0.949956	34.8212	18.6196	12.163	14.4736	8.42094	9.93433	22.2738	2.22782
NA	-0.73935	0.0941517	0.901753	36.1605	10.6398	13.136	21.7104	10.8269	16.2261	10.8779	8.91129
Apobec1	-0.738765	0.0823929	0.896453	32.1426	29.2594	26.7585	7.23678	16.8419	11.2589	11.9139	20.0504
Arhgap30	-0.73723	0.116172	0.92184	37.4997	21.2795	12.6495	8.44291	13.2329	12.9146	10.3599	8.91129
AV039307	-0.737217	0.156785	0.949956	16.0713	5.31988	9.73038	18.092	6.01496	7.61632	4.66196	15.5948
Cfap44	-0.73699	0.0521096	0.874101	57.5889	26.5994	22.3799	21.7104	21.6539	17.8818	22.7918	11.1391
Gm6863	-0.736103	0.12348	0.933869	40.1783	23.9395	25.7855	6.03065	18.0449	19.2064	8.28793	11.1391
Npl	-0.733857	0.126766	0.933869	18.7499	29.2594	11.1899	16.8858	12.0299	11.2589	15.0219	0
Lgals3	-0.733022	0.112854	0.917415	20.0891	77.1383	32.5968	9.64904	24.0598	17.2195	23.3098	13.3669
Ttr	-0.732639	0.669804	0.992181	4155.77	2008.26	1901.8	12.0613	743.449	41.0619	4069.37	6.68347
Timp2	-0.732115	0.150085	0.948886	569.192	260.674	171.741	115.789	140.75	141.067	192.694	198.276
Gm6136	-0.731148	0.156285	0.949956	50.8925	13.2997	19.9473	12.0613	8.42094	22.1867	6.73394	22.2782
Gm28119	-0.730012	0.0792879	0.896453	32.1426	15.9596	18.0012	14.4736	16.8419	11.59	7.76993	15.5948
Mafb	-0.72902	0.0892738	0.896453	30.8034	63.8386	24.3259	10.8552	22.8568	12.2523	18.6478	22.2782
Rpl17-ps5	-0.727627	0.126155	0.933869	18.7499	10.6398	14.109	12.0613	3.60898	10.2655	10.8779	6.68347
Ky	-0.72679	0.226082	0.961301	16.0713	5.31988	16.5416	4.82452	1.20299	8.27861	7.25194	11.1391
Pcdhb15	-0.726562	0.0212052	0.866547	28.1248	39.8991	31.1372	25.3287	22.8568	20.1998	14.5039	15.5948
Moap1	-0.724667	0.0646563	0.884177	25.4462	13.2997	16.0551	22.9165	8.42094	13.2458	12.9499	11.1391
Rcn3	-0.723026	0.0829215	0.896453	20.0891	31.9193	16.0551	12.0613	15.6389	8.27861	11.9139	11.1391
Npas4	-0.722458	0.066486	0.88683	46.8747	39.8991	24.8125	18.092	27.6688	10.9278	16.5759	26.7339
Tnfrsf1b	-0.722428	0.191484	0.952987	8.03566	26.5994	11.1899	7.23678	2.40598	8.27861	10.3599	6.68347
Tlr13	-0.720323	0.158769	0.949956	26.7855	34.5792	8.27082	7.23678	8.42094	9.93433	12.9499	11.1391
Tlr4	-0.718172	0.0783061	0.896453	13.3928	23.9395	25.299	12.0613	12.0299	11.2589	10.3599	13.3669
C1qc	-0.717979	0.00327168	0.747015	204.909	273.974	165.416	97.6966	131.126	88.4155	113.441	113.619
Hmox1	-0.716608	0.0601922	0.874649	18.7499	42.5591	24.3259	18.092	15.6389	14.5703	19.1658	6.68347
Gm26789	-0.716006	0.0793974	0.896453	12.0535	34.5792	18.0012	16.8858	10.8269	10.5966	10.3599	17.8226
Sorcs2	-0.714576	0.092821	0.900842	88.3922	26.5994	20.9203	27.741	16.8419	29.4718	20.7198	33.4174
Syt5	-0.714447	0.156704	0.949956	91.0708	26.5994	18.4877	9.64904	24.0598	18.8752	21.7558	24.5061
Gm1976	-0.712842	0.0189944	0.866547	68.3031	34.5792	36.9754	67.5433	19.2479	37.4193	30.5617	40.1008
Mmp15	-0.710375	0.08851	0.896453	54.9103	31.9193	26.7585	26.5349	10.8269	30.4653	29.5257	6.68347
Igfbp2	-0.709151	0.151272	0.949538	160.713	156.937	77.3565	43.4207	63.7586	41.0619	98.4191	62.3791
Cxcl16	-0.708877	0.125126	0.933869	16.0713	23.9395	12.163	8.44291	8.42094	7.61632	10.8779	6.68347
Zfp429	-0.707903	0.123741	0.933869	17.4106	7.97982	17.5147	16.8858	3.60898	11.9212	8.28793	15.5948
Rgs4	-0.705942	0.17455	0.949956	192.856	82.4582	59.3553	38.5962	45.7137	52.6519	73.5554	55.6956
Gm18190	-0.704576	0.111852	0.917341	9.37493	34.5792	15.0821	14.4736	10.8269	11.59	8.28793	11.1391
Fat4	-0.704529	0.0730426	0.896453	40.1783	23.9395	15.0821	18.092	12.0299	14.9015	13.9859	17.8226
Rimbp2	-0.703043	0.0602639	0.874649	107.142	63.8386	29.6777	27.741	36.0898	36.4259	29.5257	35.6452
Rnf17	-0.702828	0.124233	0.933869	10.7142	13.2997	13.6225	13.2674	8.42094	8.94089	6.73394	6.68347
St6galnac5	-0.702699	0.0756036	0.896453	52.2318	21.2795	18.9742	28.9471	12.0299	23.5112	13.4679	26.7339
Gm8995	-0.702474	0.0837076	0.896453	18.7499	31.9193	27.7316	13.2674	10.8269	14.5703	19.1658	6.68347
Trim30a	-0.70195	0.0365163	0.866547	36.1605	55.8588	36.4889	16.8858	19.2479	19.5375	21.2378	28.9617
Ankrd6	-0.701344	0.0356548	0.866547	123.213	50.5389	38.435	45.833	33.6838	42.0553	40.9216	40.1008
H2-Q6	-0.700628	0.155701	0.949956	14.732	13.2997	12.163	15.6797	8.42094	8.94089	12.4319	0
Gramd2	-0.700188	0.164297	0.949956	17.4106	7.97982	8.27082	12.0613	8.42094	6.95403	7.25194	4.45565
Cyp2j12	-0.699735	0.0701504	0.894412	17.4106	37.2392	23.3529	15.6797	8.42094	12.9146	17.6118	15.5948
H2-DMa	-0.698025	0.14708	0.94857	25.4462	15.9596	10.7034	8.44291	9.62394	9.93433	9.84191	4.45565
Il15ra	-0.695318	0.0929999	0.900842	36.1605	15.9596	16.0551	14.4736	13.2329	9.93433	15.0219	13.3669
Gstm2	-0.69492	0.203534	0.954787	8.03566	21.2795	12.163	9.64904	2.40598	5.29831	8.28793	17.8226
Gm29216	-0.694377	0.435255	0.983843	346.873	31.9193	149.848	32.5655	40.9017	102.986	42.4756	162.631
Zkscan16	-0.693944	0.00134829	0.723298	287.944	151.617	146.442	159.209	132.329	122.192	102.045	102.48
1500009L16Rik	-0.692286	0.0495226	0.871226	28.1248	21.2795	18.4877	27.741	15.6389	13.2458	12.9499	20.0504
Cd180	-0.689518	0.203349	0.954787	9.37493	13.2997	22.8664	6.03065	3.60898	8.60975	7.76993	15.5948
Iigp1	-0.688802	0.163685	0.949956	18.7499	31.9193	17.5147	4.82452	9.62394	6.62288	14.5039	13.3669
Lix1	-0.688538	0.0229859	0.866547	95.0886	34.5792	42.8137	55.482	34.8868	41.0619	37.2957	24.5061
Arhgef5	-0.687602	0.102975	0.908143	20.0891	18.6196	13.6225	13.2674	13.2329	8.27861	10.8779	6.68347
Elavl2	-0.686697	0.102754	0.908143	571.871	297.913	162.497	189.363	208.118	171.533	197.356	180.454
C4b	-0.685922	0.144067	0.94857	330.801	577.207	294.83	115.789	208.118	160.274	266.768	180.454
Gfap	-0.685321	0.0769773	0.896453	2160.25	3181.29	2478.33	1036.07	1835.77	1204.7	1557.61	904.496
C3ar1	-0.685271	0.122343	0.931178	21.4284	50.5389	18.0012	9.64904	14.4359	10.9278	18.1298	13.3669
Parp9	-0.68508	0.0172837	0.866547	57.5889	71.8184	38.9215	42.2146	27.6688	28.4784	42.4756	22.2782
AU020206	-0.685011	0.0363654	0.866547	37.4997	58.5187	36.0024	20.5042	18.0449	26.4915	18.6478	28.9617
A930004J17Rik	-0.684877	0.00935162	0.844248	52.2318	61.1787	49.6249	79.6046	37.2927	43.0487	25.8998	46.7843
Fam46a	-0.68483	0.0835279	0.896453	36.1605	15.9596	19.9473	14.4736	15.6389	12.5835	15.5399	8.91129
Gm42600	-0.683959	0.123047	0.933869	9.37493	31.9193	15.0821	18.092	7.21795	13.2458	8.28793	15.5948
Dnah12	-0.683027	0.238502	0.96139	24.107	5.31988	5.83823	8.44291	6.01496	5.9606	8.28793	6.68347
Drc1	-0.682513	0.261101	0.969966	30.8034	5.31988	8.75734	4.82452	6.01496	8.60975	10.3599	4.45565
Laptm5	-0.681774	0.00218029	0.747015	109.821	148.957	100.223	67.5433	75.7885	66.56	58.0155	57.9234
Kcna3	-0.681395	0.110841	0.916924	32.1426	23.9395	13.6225	16.8858	8.42094	17.5506	8.80592	17.8226
Begain	-0.680215	0.214076	0.957959	254.462	74.4784	61.7879	65.1311	55.3376	70.2026	97.3831	60.1512
Bst2	-0.67991	0.0637022	0.882522	61.6067	26.5994	33.0833	20.5042	24.0598	15.2326	28.4897	22.2782
Spidr	-0.679625	0.216099	0.957959	25.4462	39.8991	14.109	2.41226	18.0449	8.60975	12.4319	8.91129
C230035I16Rik	-0.679323	0.178003	0.950531	20.0891	10.6398	7.29778	12.0613	10.8269	6.29174	7.25194	6.68347
Glra1	-0.679152	0.350818	0.978045	24.107	13.2997	5.83823	1.20613	1.20299	5.9606	11.9139	6.68347
Epop	-0.678672	0.227064	0.961301	32.1426	7.97982	6.81126	12.0613	9.62394	7.28517	5.69795	17.8226
Gm10501	-0.678122	0.211722	0.955604	12.0535	10.6398	8.27082	10.8552	2.40598	7.94746	8.28793	4.45565
Sema3c	-0.676742	0.0453379	0.866547	95.0886	63.8386	48.1654	25.3287	45.7137	39.7373	31.0797	24.5061
5730405O15Rik	-0.676503	0.0799523	0.896453	14.732	23.9395	18.9742	19.2981	8.42094	13.9081	11.9139	11.1391
Gm16984	-0.676264	0.23214	0.961301	2.67855	13.2997	15.0821	8.44291	6.01496	5.9606	6.73394	6.68347
Flnc	-0.673846	0.0953641	0.903172	30.8034	23.9395	23.8394	8.44291	10.8269	13.5769	14.5039	15.5948
Dera	-0.673017	0.238992	0.96139	12.0535	2.65994	9.24386	22.9165	3.60898	5.29831	11.3959	11.1391
Epha5	-0.672519	0.197128	0.952987	235.713	61.1787	61.3014	61.5127	69.7735	59.9371	67.3394	66.8347
Scn9a	-0.672203	0.00267962	0.747015	100.446	53.1988	74.4374	84.4291	48.1197	58.2814	42.4756	49.0121
Cntnap5a	-0.671751	0.0301071	0.866547	191.517	66.4985	61.7879	78.3985	67.3675	64.5731	54.3895	64.6069
Zfp953	-0.670264	0.155012	0.949956	17.4106	5.31988	15.5686	19.2981	7.21795	12.5835	10.3599	4.45565
Snca	-0.66928	0.0218829	0.866547	226.338	85.1181	95.8442	88.0475	68.5705	88.0844	93.7572	55.6956
Gm10767	-0.668965	0.0384048	0.866547	26.7855	23.9395	26.7585	24.1226	15.6389	15.8949	15.0219	20.0504
Ptges	-0.668652	0.0945566	0.901753	13.3928	45.219	18.4877	20.5042	10.8269	13.2458	14.5039	20.0504
Tefm	-0.66836	0.0245908	0.866547	38.839	26.5994	37.462	50.6575	27.6688	20.1998	31.0797	17.8226
Ncf1	-0.666842	0.0803148	0.896453	40.1783	53.1988	24.3259	15.6797	18.0449	15.8949	17.6118	33.4174
Aff2	-0.664044	0.0905526	0.898059	52.2318	31.9193	23.8394	26.5349	20.4509	29.4718	22.2738	4.45565
Foxp2	-0.663824	0.0510487	0.874101	137.945	42.5591	40.8676	63.9249	40.9017	54.3077	37.8137	46.7843
B230217O12Rik	-0.663178	0.0688144	0.894412	50.8925	37.2392	27.2451	16.8858	12.0299	20.5309	24.3458	24.5061
Rgs17	-0.662279	0.140492	0.948172	796.869	250.034	241.313	256.906	250.222	237.099	218.594	271.794
Fam180a	-0.66184	0.172694	0.949956	16.0713	13.2997	11.6765	13.2674	9.62394	5.29831	6.73394	17.8226
Lgals3bp	-0.661695	0.00945187	0.844248	103.124	132.997	87.5734	51.8636	46.9167	50.6651	64.2314	73.5182
Ak7	-0.660491	0.266085	0.971476	26.7855	7.97982	9.24386	6.03065	8.42094	4.30487	13.4679	4.45565
Kif20a	-0.660484	0.191279	0.952987	12.0535	7.97982	10.7034	9.64904	4.81197	7.28517	6.73394	6.68347
A430106G13Rik	-0.659156	0.0482487	0.870262	17.4106	39.8991	34.5428	38.5962	14.4359	21.5244	18.1298	31.1895
Snora34	-0.658786	0.309975	0.976482	10.7142	2.65994	11.1899	8.44291	3.60898	8.60975	6.73394	0
Gm5844	-0.658431	0.141092	0.948257	28.1248	10.6398	19.4608	8.44291	10.8269	10.2655	9.32392	15.5948
Fam228a	-0.657008	0.131556	0.938381	22.7677	7.97982	16.0551	15.6797	6.01496	9.27204	12.9499	13.3669
Erg	-0.656802	0.235437	0.961337	2.67855	37.2392	11.1899	16.8858	14.4359	8.27861	9.84191	6.68347
Hist1h4i	-0.656529	0.19063	0.952987	13.3928	10.6398	8.75734	16.8858	9.62394	5.29831	10.8779	4.45565
Fli1	-0.656102	0.191898	0.952987	6.69638	18.6196	12.163	10.8552	9.62394	8.60975	4.66196	6.68347
Zbed5	-0.65541	0.151153	0.949538	26.7855	13.2997	11.6765	12.0613	12.0299	11.2589	9.84191	4.45565
Pik3cg	-0.655319	0.207405	0.955078	17.4106	34.5792	13.136	3.61839	10.8269	8.94089	12.4319	6.68347
Slfn2	-0.654802	0.246578	0.964081	9.37493	13.2997	15.0821	3.61839	7.21795	7.28517	7.76993	2.22782
Kif18a	-0.654186	0.171385	0.949956	10.7142	13.2997	9.73038	14.4736	7.21795	8.94089	6.21595	6.68347
Gm43951	-0.653862	0.133385	0.941531	10.7142	21.2795	18.9742	24.1226	15.6389	14.2392	5.69795	13.3669
Slfn5	-0.653287	0.0631868	0.882522	21.4284	69.1585	38.435	27.741	14.4359	24.1735	24.8638	33.4174
Cgref1	-0.652428	0.153163	0.949956	38.839	10.6398	14.5956	13.2674	9.62394	13.2458	15.5399	8.91129
Necab1	-0.648721	0.00153114	0.747015	243.748	170.236	127.468	151.972	103.457	112.92	94.2752	133.669
Gm7536	-0.64853	0.116604	0.921877	60.2674	31.9193	30.6507	13.2674	15.6389	27.485	13.9859	31.1895
Tmem44	-0.647505	0.057133	0.874101	104.464	45.219	38.435	33.7717	44.5107	29.803	35.7417	31.1895
Ptgr1	-0.64671	0.129599	0.938381	17.4106	10.6398	12.6495	18.092	10.8269	9.93433	8.28793	8.91129
Sema5b	-0.64669	0.102647	0.908143	33.4819	26.5994	18.0012	16.8858	12.0299	19.8687	9.32392	17.8226
Rwdd2a	-0.646327	0.131555	0.938381	117.856	31.9193	22.3799	33.7717	28.8718	31.1276	42.4756	26.7339
Dsel	-0.644585	0.0381083	0.866547	69.6424	39.8991	29.6777	33.7717	27.6688	26.8227	24.8638	31.1895
Zfp618	-0.644115	0.164051	0.949956	25.4462	23.9395	9.24386	18.092	4.81197	12.9146	15.5399	11.1391
H2-T23	-0.643889	0.0695665	0.894412	77.678	66.4985	34.0563	25.3287	32.4808	26.8227	43.5116	20.0504
Gm6712	-0.643815	0.0650236	0.88661	26.7855	21.2795	30.1642	19.2981	20.4509	14.9015	12.4319	20.0504
Cfap43	-0.643677	0.268971	0.971476	38.839	7.97982	10.2169	4.82452	9.62394	6.29174	11.9139	13.3669
Elfn2	-0.64262	0.0612951	0.876606	99.1064	50.5389	31.6237	33.7717	28.8718	36.4259	32.6337	37.873
Pygl	-0.64252	0.26822	0.971476	21.4284	18.6196	7.29778	4.82452	6.01496	8.27861	11.9139	2.22782
Adra2a	-0.642245	0.0760457	0.896453	48.2139	87.7781	29.6777	30.1533	24.0598	36.4259	36.2597	15.5948
Gm43143	-0.641923	0.217859	0.957959	10.7142	10.6398	14.5956	7.23678	3.60898	7.94746	5.69795	13.3669
Anxa3	-0.641615	0.0472112	0.866615	50.8925	106.398	42.3271	30.1533	37.2927	30.1341	38.3317	33.4174
Gm16192	-0.641373	0.250906	0.967053	16.0713	13.2997	9.73038	8.44291	6.01496	11.59	7.76993	0
Sntg1	-0.641306	0.0526109	0.874101	101.785	45.219	37.9485	41.0084	26.4658	45.0356	31.5977	40.1008
Tradd	-0.640615	0.121477	0.930669	16.0713	47.8789	18.0012	20.5042	14.4359	19.2064	16.0579	6.68347
Gm10561	-0.639967	0.138449	0.946337	13.3928	21.2795	12.6495	14.4736	10.8269	7.94746	11.3959	6.68347
Nipal4	-0.639914	0.0690161	0.894412	38.839	29.2594	32.5968	14.4736	19.2479	17.2195	22.2738	13.3669
Hrasls	-0.639593	0.0436697	0.866547	105.803	34.5792	44.7597	47.0391	39.6987	44.0422	31.5977	33.4174
Lypd1	-0.639051	0.0437755	0.866547	68.3031	50.5389	33.0833	26.5349	25.2628	30.4653	23.8278	33.4174
Lacc1	-0.638856	0.0787284	0.896453	36.1605	29.2594	19.9473	26.5349	10.8269	17.2195	24.8638	13.3669
Gm4366	-0.638569	0.147529	0.94857	34.8212	18.6196	18.4877	10.8552	9.62394	17.8818	8.28793	17.8226
Trem2	-0.638542	0.0438718	0.866547	58.9282	122.357	70.0587	28.9471	40.9017	41.7242	49.7276	40.1008
Gm4617	-0.637718	0.187369	0.952987	17.4106	18.6196	14.109	9.64904	2.40598	12.2523	11.3959	8.91129
Col4a1	-0.637605	0.0408725	0.866547	50.8925	42.5591	34.0563	22.9165	27.6688	18.5441	24.8638	26.7339
Greb1	-0.636651	0.201495	0.954787	14.732	23.9395	11.6765	6.03065	12.0299	6.62288	9.84191	4.45565
Mill2	-0.636629	0.188456	0.952987	12.0535	13.2997	15.5686	10.8552	6.01496	6.29174	13.4679	6.68347
Prg4	-0.636169	0.0928755	0.900842	24.107	23.9395	31.6237	26.5349	7.21795	23.8424	12.9499	26.7339
Dnah7c	-0.635546	0.097205	0.905368	17.4106	13.2997	18.0012	27.741	15.6389	11.9212	11.9139	11.1391
Tnfrsf1a	-0.635538	0.0363634	0.866547	41.5176	42.5591	28.7046	30.1533	20.4509	27.485	18.6478	20.0504
Gm43751	-0.634822	0.264142	0.971476	10.7142	5.31988	8.75734	15.6797	2.40598	10.2655	4.66196	8.91129
A230072E10Rik	-0.634654	0.162905	0.949956	10.7142	29.2594	11.6765	13.2674	12.0299	10.2655	7.25194	8.91129
Eya4	-0.634573	0.14519	0.94857	18.7499	13.2997	10.7034	15.6797	10.8269	8.27861	9.32392	8.91129
Frmpd3	-0.633781	0.00406402	0.822451	152.677	77.1383	101.682	91.6659	80.6005	65.2354	74.5913	51.2399
Gm45464	-0.632666	0.148496	0.94857	18.7499	23.9395	20.9203	12.0613	14.4359	13.9081	5.17995	17.8226
Spef2	-0.632314	0.108659	0.916331	34.8212	23.9395	18.4877	14.4736	20.4509	11.2589	11.9139	17.8226
Cetn4	-0.630324	0.116139	0.92184	37.4997	31.9193	14.109	22.9165	12.0299	14.2392	23.8278	13.3669
NA	-0.630261	0.0434635	0.866547	46.8747	58.5187	36.9754	45.833	39.6987	31.7898	32.6337	6.68347
Ly86	-0.630175	0.0170267	0.866547	70.9816	61.1787	42.8137	41.0084	33.6838	31.1276	39.8856	28.9617
Ube2n-ps1	-0.629611	0.1429	0.94857	20.0891	7.97982	24.3259	16.8858	14.4359	15.2326	9.32392	6.68347
Dtx3l	-0.629354	0.037965	0.866547	30.8034	50.5389	30.6507	39.8023	14.4359	22.5178	27.4538	31.1895
Ak5	-0.628914	0.158099	0.949956	74.9995	37.2392	21.8933	20.5042	10.8269	24.5047	39.8856	20.0504
Gm2000	-0.625995	0.125253	0.933869	62.946	42.5591	29.1911	12.0613	22.8568	26.4915	15.0219	31.1895
Col15a1	-0.625517	0.184204	0.952662	26.7855	15.9596	11.6765	7.23678	10.8269	10.5966	8.28793	8.91129
Bid	-0.62527	0.299697	0.976482	29.4641	5.31988	9.73038	4.82452	3.60898	7.61632	7.76993	15.5948
Cnih3	-0.623433	0.241791	0.963218	32.1426	7.97982	8.27082	8.44291	8.42094	8.27861	10.8779	8.91129
Cdh12	-0.623084	0.0158981	0.866547	77.678	61.1787	44.2732	42.2146	37.2927	36.4259	33.6697	35.6452
Slc9a2	-0.622735	0.248371	0.965234	12.0535	5.31988	12.163	13.2674	6.01496	5.29831	5.17995	17.8226
1700028K03Rik	-0.622297	0.112097	0.917341	21.4284	18.6196	15.5686	18.092	10.8269	14.2392	8.80592	13.3669
Slc7a11	-0.621345	0.000380236	0.597731	308.034	250.034	269.045	205.042	158.795	185.772	127.427	209.415
Zfp934	-0.621209	0.145028	0.94857	16.0713	23.9395	11.6765	22.9165	14.4359	13.5769	7.25194	11.1391
Nckap1l	-0.620255	0.0695985	0.894412	48.2139	85.1181	47.1923	26.5349	51.7287	22.1867	29.5257	28.9617
B3galt2	-0.619664	0.0206453	0.866547	192.856	148.957	72.0048	104.933	103.457	76.8255	66.3034	89.1129
Gm37499	-0.61948	0.046207	0.866547	33.4819	31.9193	24.3259	31.3594	16.8419	22.1867	17.0938	20.0504
Gm6472	-0.619123	0.303109	0.976482	28.1248	5.31988	14.5956	2.41226	6.01496	11.2589	7.25194	8.91129
Wfdc1	-0.61881	0.145924	0.94857	12.0535	23.9395	17.0282	12.0613	9.62394	11.9212	10.3599	6.68347
Cfap54	-0.617984	0.337665	0.976482	30.8034	7.97982	6.32475	4.82452	6.01496	5.62945	14.5039	4.45565
Ctsh	-0.61672	0.0200441	0.866547	69.6424	103.738	58.3823	45.833	52.9316	37.0882	50.2456	31.1895
Acss3	-0.615194	0.147373	0.94857	28.1248	34.5792	10.7034	14.4736	13.2329	13.2458	12.9499	13.3669
Spa17	-0.613575	0.235212	0.961337	14.732	5.31988	14.109	12.0613	6.01496	9.27204	10.8779	2.22782
Ncan	-0.613435	0.0891456	0.896453	128.571	34.5792	41.3541	42.2146	37.2927	49.0093	34.7057	40.1008
Slc35f4	-0.61336	0.216486	0.957959	49.5532	21.2795	9.73038	12.0613	20.4509	11.59	11.3959	17.8226
Gucy1a2	-0.611035	0.0184537	0.866547	68.3031	42.5591	49.6249	49.4514	37.2927	40.7307	25.3818	35.6452
Gm37309	-0.61045	0.0486118	0.871226	22.7677	39.8991	29.1911	36.1839	18.0449	21.8555	22.7918	15.5948
Fcgr3	-0.610068	0.110677	0.916924	60.2674	71.8184	35.0294	16.8858	32.4808	21.1932	40.4036	20.0504
Gm32856	-0.60896	0.14738	0.94857	14.732	26.5994	14.5956	12.0613	7.21795	9.93433	11.9139	13.3669
Slc25a45	-0.608931	0.200021	0.953773	22.7677	21.2795	9.24386	8.44291	7.21795	10.2655	10.3599	8.91129
Ctss	-0.607887	0.0528938	0.874101	591.96	715.524	381.431	278.616	333.229	260.611	356.381	336.401
Gm26575	-0.607411	0.207665	0.955078	10.7142	26.5994	9.24386	16.8858	13.2329	11.59	7.25194	4.45565
Dab2	-0.605725	0.011539	0.866547	64.2853	53.1988	46.7058	45.833	33.6838	32.121	36.7777	33.4174
St6gal2	-0.605709	0.184292	0.952771	53.5711	21.2795	13.6225	14.4736	21.6539	16.8884	17.0938	8.91129
Nsg2	-0.605344	0.185235	0.952987	803.566	343.132	239.854	220.722	204.509	270.545	304.063	276.25
Plcg2	-0.603207	0.180211	0.950533	22.7677	13.2997	18.4877	7.23678	13.2329	10.5966	7.76993	11.1391
Shroom2	-0.60293	0.041721	0.866547	262.498	101.078	99.2498	114.582	97.4423	86.0975	128.981	62.3791
2024-09-09	-0.60244	0.119217	0.925748	80.3566	37.2392	25.7855	22.9165	25.2628	21.1932	36.2597	24.5061
Kcns3	-0.601046	0.295386	0.976482	16.0713	10.6398	7.7843	6.03065	2.40598	7.94746	8.80592	4.45565
Gm9762	-0.600897	0.174245	0.949956	21.4284	10.6398	16.5416	14.4736	8.42094	13.9081	6.21595	15.5948
Dapk1	-0.600618	0.0785168	0.896453	112.499	47.8789	35.0294	44.6268	30.0748	47.0225	42.9936	33.4174
Mfsd7a	-0.600577	0.192977	0.952987	16.0713	15.9596	12.163	9.64904	9.62394	5.9606	10.8779	8.91129
Hcrtr2	-0.600094	0.213459	0.957326	36.1605	15.9596	12.163	12.0613	13.2329	8.60975	19.1658	6.68347
Vstm2a	-0.599992	0.217481	0.957959	321.426	103.738	92.4386	83.223	93.8334	100.668	111.887	89.1129
Islr	-0.599871	0.0591717	0.874101	36.1605	26.5994	34.0563	19.2981	19.2479	18.8752	20.2018	20.0504
Gm10288	-0.599362	0.270401	0.971476	20.0891	13.2997	12.163	3.61839	6.01496	11.59	6.21595	6.68347
2310039H08Rik	-0.599197	0.25468	0.969966	14.732	10.6398	11.1899	7.23678	3.60898	9.27204	8.80592	4.45565
D930048N14Rik	-0.597136	0.171203	0.949956	12.0535	26.5994	13.136	21.7104	13.2329	9.93433	15.5399	4.45565
Gm42723	-0.596704	0.265855	0.971476	8.03566	10.6398	6.81126	19.2981	7.21795	9.27204	5.17995	6.68347
Fam84b	-0.596545	0.101194	0.906692	28.1248	34.5792	37.9485	16.8858	22.8568	23.1801	20.2018	6.68347
Htatip2	-0.596473	0.192701	0.952987	16.0713	15.9596	10.2169	10.8552	10.8269	7.28517	8.80592	6.68347
Tnip2	-0.596383	0.111612	0.917325	45.5354	45.219	18.9742	16.8858	20.4509	20.8621	16.5759	22.2782
Irgm2	-0.595764	0.462953	0.983843	22.7677	53.1988	24.3259	9.64904	6.01496	16.8884	41.4396	4.45565
Map3k19	-0.595359	0.160712	0.949956	21.4284	29.2594	11.6765	12.0613	9.62394	11.9212	11.9139	11.1391
Cyp4f17	-0.594938	0.0943883	0.901753	34.8212	29.2594	23.8394	19.2981	14.4359	21.1932	19.6838	8.91129
Susd2	-0.593408	0.200152	0.953773	36.1605	18.6196	13.136	8.44291	14.4359	14.2392	9.32392	11.1391
Kdelc2	-0.593269	0.028196	0.866547	42.8568	58.5187	40.3811	44.6268	20.4509	27.485	37.8137	33.4174
Csmd1	-0.593263	0.0548673	0.874101	101.785	42.5591	43.7867	55.482	39.6987	48.3471	26.9358	49.0121
Ifih1	-0.593257	0.0615037	0.876606	40.1783	53.1988	30.1642	44.6268	14.4359	23.1801	36.7777	33.4174
Clec5a	-0.591351	0.210724	0.955078	18.7499	15.9596	9.24386	10.8552	6.01496	9.60318	10.3599	6.68347
Rtp4	-0.590723	0.135409	0.943156	32.1426	39.8991	19.9473	15.6797	18.0449	11.9212	24.8638	11.1391
Ncam2	-0.590367	0.0110291	0.866547	278.569	159.596	154.713	150.766	159.998	135.769	85.4692	113.619
Abracl	-0.5899	0.156732	0.949956	41.5176	15.9596	23.3529	13.2674	15.6389	16.8884	20.2018	6.68347
Tmem196	-0.58781	0.203533	0.954787	52.2318	21.2795	12.163	13.2674	15.6389	19.5375	14.5039	13.3669
Tgfbi	-0.586996	0.268779	0.971476	5.35711	39.8991	22.8664	7.23678	12.0299	15.5638	8.28793	11.1391
Tox2	-0.586932	0.28831	0.976079	72.3209	13.2997	17.5147	7.23678	28.8718	12.5835	19.1658	13.3669
1500015O10Rik	-0.586585	0.256163	0.969966	41.5176	53.1988	26.272	16.8858	21.6539	7.28517	48.6916	8.91129
AC154141.1	-0.586577	0.276325	0.975338	6.69638	15.9596	9.73038	9.64904	2.40598	8.27861	7.76993	6.68347
Gm6395	-0.586026	0.261547	0.969966	9.37493	21.2795	11.6765	12.0613	8.42094	14.2392	4.66196	4.45565
Ptpn6	-0.585855	0.204107	0.955078	21.4284	31.9193	13.136	8.44291	8.42094	12.9146	15.0219	6.68347
Itgb2	-0.585184	0.136124	0.944839	45.5354	47.8789	36.9754	10.8552	30.0748	21.1932	26.9358	11.1391
Arhgap29	-0.585132	0.00331866	0.747015	79.0173	130.337	90.006	100.109	56.5406	69.5403	58.5335	77.9738
Dnah5	-0.584492	0.221275	0.957959	16.0713	13.2997	14.109	15.6797	9.62394	15.5638	7.76993	2.22782
Ankrd55	-0.583761	0.112771	0.917415	38.839	42.5591	20.4338	18.092	15.6389	14.5703	24.3458	22.2782
Tdrd5	-0.58355	0.39942	0.982178	26.7855	0	6.32475	6.03065	2.40598	7.28517	8.28793	8.91129
Lrrtm4	-0.582733	0.172821	0.949956	44.1961	18.6196	18.0012	13.2674	20.4509	11.2589	19.1658	11.1391
Mindy4b-ps	-0.579561	0.194342	0.952987	17.4106	13.2997	13.136	13.2674	10.8269	5.9606	11.9139	11.1391
Naalad2	-0.579421	0.0392631	0.866547	33.4819	34.5792	35.0294	30.1533	22.8568	21.1932	23.3098	22.2782
Unc13b	-0.579293	0.0325736	0.866547	160.713	69.1585	71.0318	79.6046	49.3227	75.5009	66.3034	60.1512
Gm38384	-0.577061	0.124816	0.933869	12.0535	31.9193	20.9203	27.741	19.2479	15.2326	11.3959	15.5948
Gpr161	-0.576672	0.0978309	0.905368	57.5889	31.9193	22.8664	27.741	18.0449	22.1867	29.5257	20.0504
Dcx	-0.576546	0.159865	0.949956	74.9995	18.6196	20.9203	26.5349	26.4658	26.8227	17.6118	24.5061
Gm16365	-0.576075	0.169211	0.949956	16.0713	21.2795	13.6225	20.5042	7.21795	15.5638	11.3959	8.91129
Rai2	-0.576046	0.186659	0.952987	18.7499	13.2997	12.163	15.6797	10.8269	11.2589	6.21595	13.3669
Hspb8	-0.576012	0.0166055	0.866547	79.0173	66.4985	51.571	56.6881	40.9017	48.3471	41.9576	28.9617
Csrnp3	-0.57594	0.00619479	0.827554	458.032	297.913	220.393	218.31	202.103	221.535	187.514	182.682
Gabrg1	-0.575487	0.156099	0.949956	321.426	146.297	107.521	100.109	113.081	107.622	118.103	113.619
Marcksl1	-0.575444	0.00993806	0.844248	88.3922	58.5187	61.3014	63.9249	48.1197	50.9962	40.9216	40.1008
Ccdc162	-0.574015	0.298169	0.976482	21.4284	15.9596	5.83823	6.03065	4.81197	7.94746	7.76993	11.1391
Cav2	-0.573703	0.0114314	0.866547	77.678	85.1181	53.5171	66.3372	52.9316	45.0356	39.8856	49.0121
Prdm16	-0.573612	0.110349	0.916924	52.2318	45.219	24.8125	16.8858	24.0598	18.8752	26.4178	20.0504
Cd33	-0.573205	0.0424185	0.866547	54.9103	50.5389	43.3002	28.9471	25.2628	32.121	23.8278	40.1008
Six5	-0.571679	0.308385	0.976482	13.3928	2.65994	10.7034	8.44291	8.42094	6.95403	6.21595	2.22782
Fzd3	-0.571127	0.00827855	0.838674	129.91	146.297	135.252	103.727	87.8184	104.31	54.9075	102.48
Rps6ka6	-0.570863	0.0704874	0.894412	65.6245	50.5389	35.0294	27.741	39.6987	25.8292	22.7918	33.4174
Snord91a	-0.569997	0.197558	0.952987	22.7677	18.6196	13.136	8.44291	12.0299	9.60318	11.3959	6.68347
Gm44769	-0.56983	0.234517	0.961337	10.7142	13.2997	14.109	9.64904	4.81197	9.60318	9.32392	6.68347
Pmaip1	-0.568361	0.327629	0.976482	8.03566	29.2594	8.75734	6.03065	14.4359	7.61632	6.21595	2.22782
C1qb	-0.5678	0.0249718	0.866547	212.945	260.674	157.146	86.8414	122.705	96.0318	134.679	124.758
Erbb4	-0.5673	0.00797096	0.836865	368.301	234.075	164.443	202.63	181.652	160.936	142.967	167.087
Gm7308	-0.567223	0.235044	0.961337	18.7499	5.31988	13.136	10.8552	7.21795	10.2655	7.25194	8.91129
Slc11a1	-0.566341	0.236567	0.96139	22.7677	26.5994	14.109	4.82452	15.6389	8.60975	10.8779	8.91129
Naip2	-0.565169	0.302391	0.976482	13.3928	5.31988	18.4877	6.03065	13.2329	5.62945	7.25194	6.68347
Emcn	-0.564272	0.226562	0.961301	10.7142	18.6196	8.75734	16.8858	8.42094	8.27861	10.3599	6.68347
P2ry12	-0.564213	0.0456316	0.866547	140.624	85.1181	58.8688	77.1924	43.3077	61.5928	82.3613	49.0121
Gnal	-0.563756	0.0013012	0.723298	601.335	516.029	557.551	311.182	348.868	364.59	334.107	289.617
Sh3bp2	-0.562679	0.222334	0.957959	17.4106	21.2795	10.7034	8.44291	12.0299	7.28517	9.32392	8.91129
Ikzf1	-0.561845	0.212943	0.957326	16.0713	29.2594	13.136	8.44291	10.8269	9.60318	12.9499	6.68347
Impact	-0.561685	0.0546881	0.874101	2410.7	1364.55	1093.69	1017.97	1038.18	960.649	986.263	1002.52
Ciita	-0.560742	0.368495	0.978328	8.03566	2.65994	14.109	10.8552	8.42094	9.93433	5.17995	0
Cmklr1	-0.560091	0.186866	0.952987	18.7499	29.2594	12.163	12.0613	13.2329	11.2589	8.80592	13.3669
Cdh10	-0.559926	0.00506442	0.822451	144.642	103.738	96.8173	97.6966	81.8035	77.8189	79.7713	51.2399
Mex3a	-0.559887	0.158051	0.949956	21.4284	31.9193	17.0282	13.2674	14.4359	13.2458	9.32392	20.0504
Gm15772	-0.559777	0.363752	0.978328	37.4997	5.31988	19.4608	2.41226	9.62394	17.2195	6.73394	11.1391
Mn1	-0.559708	0.3237	0.976482	28.1248	7.97982	9.73038	3.61839	8.42094	7.94746	9.84191	6.68347
Gm43980	-0.559036	0.00283749	0.747015	145.981	247.375	191.688	248.463	168.419	129.477	117.067	153.72
Rtl1	-0.558579	0.0418614	0.866547	37.4997	45.219	35.0294	37.39	24.0598	27.1538	29.0077	17.8226
Gm15459	-0.558502	0.311452	0.976482	28.1248	10.6398	15.5686	3.61839	4.81197	13.9081	7.76993	13.3669
Gm12224	-0.55848	0.309026	0.976482	8.03566	7.97982	9.24386	14.4736	4.81197	9.27204	7.76993	2.22782
Ccdc153	-0.55792	0.286917	0.976079	33.4819	13.2997	8.75734	10.8552	9.62394	7.94746	18.1298	6.68347
Gm15472	-0.55784	0.221429	0.957959	13.3928	21.2795	21.4068	15.6797	8.42094	19.8687	10.8779	4.45565
Fxyd7	-0.557699	0.203455	0.954787	41.5176	15.9596	13.136	13.2674	15.6389	12.9146	11.9139	17.8226
Scg2	-0.557267	0.0877312	0.896453	1854.9	872.461	797.891	781.573	731.419	734.147	845.887	612.652
Parp14	-0.556207	0.166204	0.949956	30.8034	42.5591	26.7585	20.5042	15.6389	19.8687	32.6337	4.45565
Zfp976	-0.554965	0.145702	0.94857	32.1426	21.2795	15.5686	24.1226	21.6539	11.59	17.6118	11.1391
Dock8	-0.554875	0.170802	0.949956	22.7677	29.2594	19.4608	8.44291	12.0299	11.59	12.9499	17.8226
Gdpd2	-0.554859	0.168147	0.949956	29.4641	29.2594	16.5416	10.8552	16.8419	15.5638	11.3959	11.1391
Kcnj13	-0.554799	0.542661	0.987859	40.1783	37.2392	27.2451	7.23678	16.8419	4.30487	48.6916	4.45565
Hpgd	-0.554795	0.062884	0.882522	50.8925	29.2594	33.0833	34.9778	26.4658	31.1276	19.6838	22.2782
Prickle2	-0.554681	0.0188853	0.866547	226.338	125.017	101.196	110.964	90.2244	95.7007	105.671	86.8851
Gm37067	-0.553174	0.375926	0.978328	2.67855	10.6398	12.163	10.8552	7.21795	9.93433	2.58998	4.45565
mt-Co2	-0.551935	0.571669	0.988103	575.889	53.1988	234.989	39.8023	55.3376	191.401	62.1595	309.667
mt-Ty	-0.551389	0.130757	0.938381	42.8568	15.9596	22.3799	19.2981	18.0449	17.2195	14.5039	22.2782
Gm17875	-0.551319	0.177712	0.950531	33.4819	15.9596	19.9473	15.6797	14.4359	20.8621	9.84191	11.1391
Scube3	-0.551285	0.307584	0.976482	18.7499	13.2997	7.29778	6.03065	6.01496	7.28517	9.84191	4.45565
Iqgap2	-0.550438	0.0778812	0.896453	41.5176	50.5389	25.299	26.5349	19.2479	23.8424	22.2738	28.9617
Il15	-0.550127	0.291193	0.976482	13.3928	7.97982	5.83823	18.092	7.21795	7.61632	8.28793	6.68347
Gm42912	-0.549988	0.143871	0.94857	12.0535	34.5792	24.3259	32.5655	24.0598	15.8949	18.1298	8.91129
Dact2	-0.549728	0.294685	0.976482	29.4641	10.6398	10.7034	7.23678	6.01496	9.93433	14.5039	6.68347
Lrrk1	-0.549322	0.217219	0.957959	14.732	15.9596	12.163	18.092	8.42094	9.93433	14.5039	4.45565
Calcrl	-0.548837	0.0801407	0.896453	41.5176	29.2594	30.6507	37.39	13.2329	30.4653	24.8638	22.2782
Gm27616	-0.548109	0.180259	0.950533	16.0713	29.2594	21.4068	13.2674	19.2479	13.2458	7.76993	15.5948
Gm5617	-0.547858	0.31019	0.976482	17.4106	21.2795	5.35171	8.44291	7.21795	8.94089	9.84191	4.45565
Hmcn1	-0.547648	0.306723	0.976482	26.7855	10.6398	12.163	19.2981	13.2329	21.8555	4.66196	4.45565
Akap5	-0.547401	0.0205721	0.866547	66.9638	61.1787	53.0306	41.0084	38.4957	35.7636	37.2957	40.1008
Gm42672	-0.547069	0.112995	0.917415	18.7499	29.2594	40.3811	33.7717	24.0598	25.4981	13.4679	24.5061
Gm5466	-0.546307	0.173043	0.949956	17.4106	10.6398	16.5416	18.092	12.0299	11.59	10.8779	8.91129
Rab9b	-0.546296	0.029897	0.866547	255.802	95.7579	111.899	129.056	99.8483	96.0318	109.297	102.48
Anxa11	-0.546022	0.366197	0.978328	5.35711	7.97982	20.4338	10.8552	3.60898	11.2589	11.9139	2.22782
Rsph1	-0.54518	0.379588	0.97921	21.4284	23.9395	9.73038	3.61839	13.2329	6.29174	16.0579	0
Gpc5	-0.544924	0.0772446	0.896453	174.106	87.7781	51.0845	69.9556	70.9765	56.6257	69.9294	62.3791
Smyd1	-0.544012	0.417741	0.983843	33.4819	7.97982	6.81126	3.61839	2.40598	6.29174	10.8779	17.8226
Gm42548	-0.543569	0.311819	0.976482	8.03566	10.6398	8.75734	10.8552	3.60898	8.27861	7.25194	4.45565
Igdcc3	-0.541769	0.258583	0.969966	16.0713	13.2997	8.27082	12.0613	9.62394	8.27861	5.69795	11.1391
Lrfn5	-0.541621	0.0535942	0.874101	186.159	79.7982	77.3565	77.1924	52.9316	75.832	77.6993	82.4295
Gm43413	-0.540048	0.260307	0.969966	13.3928	10.6398	16.5416	8.44291	10.8269	5.9606	8.28793	13.3669
Chil1	-0.53987	0.0566047	0.874101	101.785	82.4582	46.7058	43.4207	43.3077	47.0225	51.7995	37.873
Gm10603	-0.538756	0.13991	0.948172	16.0713	23.9395	21.8933	19.2981	18.0449	12.9146	11.3959	15.5948
Ston2	-0.538704	0.0930897	0.901096	37.4997	23.9395	30.6507	24.1226	24.0598	23.8424	16.0579	15.5948
Ccdc15	-0.538359	0.222659	0.957959	16.0713	18.6196	12.6495	18.092	19.2479	9.27204	6.73394	11.1391
AU041133	-0.537922	0.0628085	0.882522	36.1605	45.219	31.6237	48.2452	36.0898	27.485	20.2018	26.7339
Gm18782	-0.53665	0.259024	0.969966	14.732	18.6196	11.6765	14.4736	3.60898	13.5769	11.9139	6.68347
Ddx3y	-0.535851	0.868098	0.993901	744.638	744.784	0	0	0	488.107	0	539.133
Klhl28	-0.535314	0.000683796	0.597731	182.142	159.596	170.768	155.591	144.359	112.589	100.491	109.163
Rnd3	-0.534552	0.0277943	0.866547	109.821	69.1585	64.707	60.3065	38.4957	58.2814	56.9795	51.2399
Fam114a1	-0.534419	0.143182	0.94857	41.5176	15.9596	20.4338	19.2981	16.8419	17.8818	16.5759	15.5948
Col1a1	-0.534388	0.116122	0.92184	29.4641	15.9596	30.1642	24.1226	12.0299	17.5506	21.7558	20.0504
Mr1	-0.534255	0.020384	0.866547	62.946	45.219	58.8688	51.8636	32.4808	41.7242	36.2597	44.5565
Xdh	-0.533763	0.205954	0.955078	22.7677	39.8991	13.6225	12.0613	15.6389	13.2458	16.0579	8.91129
1110008L16Rik	-0.532467	0.154307	0.949956	14.732	26.5994	20.4338	28.9471	12.0299	11.9212	17.0938	24.5061
Tmed3	-0.532435	0.0482968	0.870262	101.785	61.1787	62.2744	65.1311	45.7137	49.3405	69.9294	26.7339
Arid3b	-0.532221	0.0908564	0.898059	20.0891	31.9193	26.272	36.1839	18.0449	19.5375	19.1658	22.2782
Gm20535	-0.530953	0.249326	0.965742	12.0535	13.2997	14.5956	10.8552	4.81197	10.9278	9.32392	8.91129
mt-Co3	-0.530337	0.505816	0.987329	669.638	103.738	344.942	101.315	103.457	278.823	85.9872	378.73
Gulp1	-0.530099	0.188793	0.952987	45.5354	18.6196	18.0012	19.2981	12.0299	17.2195	24.3458	13.3669
Lrp1b	-0.529902	0.0110325	0.866547	349.551	191.516	201.905	189.363	191.276	182.129	134.161	135.897
Atp23	-0.529112	0.162914	0.949956	37.4997	29.2594	16.5416	19.2981	20.4509	19.5375	11.3959	17.8226
Pdzd2	-0.528452	0.151565	0.949538	74.9995	31.9193	26.272	22.9165	27.6688	26.1604	31.0797	20.0504
Anxa4	-0.526939	0.0733622	0.896453	30.8034	53.1988	46.2193	45.833	36.0898	33.7767	32.6337	11.1391
Cd74	-0.526741	0.238216	0.96139	21.4284	34.5792	15.0821	7.23678	12.0299	11.2589	10.3599	20.0504
Tnni1	-0.525391	0.277974	0.975338	21.4284	18.6196	10.2169	12.0613	9.62394	7.61632	17.0938	4.45565
Rel	-0.525388	0.0624683	0.882522	30.8034	42.5591	31.1372	33.7717	21.6539	25.167	21.7558	24.5061
Cd14	-0.525158	0.259196	0.969966	14.732	21.2795	10.7034	8.44291	7.21795	7.28517	10.8779	11.1391
Npnt	-0.525009	0.132395	0.938381	46.8747	29.2594	23.8394	19.2981	16.8419	17.2195	21.7558	28.9617
Gm26910	-0.524686	0.267326	0.971476	9.37493	13.2997	10.7034	13.2674	10.8269	8.27861	6.21595	6.68347
Cfh	-0.524569	0.00325422	0.747015	222.32	305.893	194.608	168.858	161.201	132.127	146.593	175.998
Usp29	-0.524568	0.0454179	0.866547	241.07	135.657	103.629	85.6353	104.66	98.3498	97.3831	89.1129
Gm14817	-0.52371	0.304058	0.976482	10.7142	21.2795	7.7843	25.3287	19.2479	7.94746	10.8779	4.45565
NA	-0.523312	0.101174	0.906692	44.1961	31.9193	33.5698	33.7717	14.4359	33.1144	27.9718	17.8226
Nlgn1	-0.522228	0.000745546	0.597731	241.07	250.034	173.201	232.783	172.028	150.339	142.967	151.492
Cd53	-0.521181	0.11736	0.92295	34.8212	29.2594	35.5159	18.092	16.8419	18.2129	26.9358	20.0504
Mkx	-0.5211	0.0558343	0.874101	50.8925	45.219	41.3541	27.741	30.0748	30.1341	27.4538	24.5061
Parvg	-0.520934	0.259531	0.969966	12.0535	18.6196	12.163	12.0613	13.2329	9.93433	8.80592	2.22782
Tes	-0.520768	0.320904	0.976482	14.732	15.9596	11.6765	3.61839	8.42094	5.29831	8.28793	11.1391
Vat1	-0.520581	0.00973512	0.844248	178.124	148.957	115.305	116.995	80.6005	111.927	107.743	73.5182
Tmem130	-0.520555	0.167981	0.949956	743.298	284.614	276.829	271.379	287.515	278.492	271.948	260.655
Serpine2	-0.519994	0.100876	0.906692	1337.94	1130.48	611.554	557.232	589.466	619.902	741.251	579.234
D730003I15Rik	-0.519979	0.155113	0.949956	24.107	15.9596	23.3529	18.092	15.6389	13.2458	11.9139	22.2782
Pdzrn3	-0.519865	0.415263	0.983843	17.4106	7.97982	13.6225	2.41226	4.81197	3.64259	13.9859	6.68347
Cst3	-0.519791	0.143601	0.94857	3579.89	2218.39	1528.64	1360.52	1447.2	1527.57	1838.88	1240.9
B2m	-0.519691	0.000702559	0.597731	819.637	989.498	635.88	571.706	561.797	490.425	510.226	527.994
Tuba1c	-0.519677	0.228267	0.961301	30.8034	18.6196	16.0551	8.44291	8.42094	12.9146	13.9859	15.5948
Id3	-0.519453	0.155617	0.949956	68.3031	61.1787	34.5428	16.8858	28.8718	30.7964	38.8497	20.0504
Pcdh10	-0.518915	0.0421482	0.866547	338.837	178.216	124.062	158.003	121.502	132.127	130.535	175.998
Eno4	-0.518887	0.278162	0.975338	24.107	7.97982	15.5686	8.44291	14.4359	6.62288	10.3599	11.1391
Rgs11	-0.518761	0.317766	0.976482	44.1961	15.9596	17.0282	7.23678	10.8269	18.5441	20.7198	4.45565
NA	-0.518718	0.120709	0.929077	32.1426	34.5792	20.9203	30.1533	22.8568	21.8555	20.7198	8.91129
Dusp19	-0.518059	0.0161696	0.866547	115.178	98.4178	86.6004	62.7188	73.3825	60.9305	64.2314	49.0121
Alx4	-0.517769	0.29482	0.976482	8.03566	15.9596	9.24386	12.0613	10.8269	6.95403	7.25194	4.45565
AI504432	-0.516768	0.0344557	0.866547	275.891	162.256	117.251	131.468	143.156	106.297	99.4551	133.669
Tmem29	-0.516574	0.0173797	0.866547	97.7672	66.4985	74.4374	86.8414	49.3227	61.924	67.8574	40.1008
Spin2c	-0.51648	0.384529	0.97921	26.7855	5.31988	5.35171	13.2674	8.42094	8.60975	13.4679	2.22782
Dgkb	-0.515045	0.0192335	0.866547	356.247	186.196	177.579	164.034	145.562	164.248	140.895	169.315
Gm27209	-0.514371	0.195031	0.952987	16.0713	21.2795	18.9742	31.3594	14.4359	9.27204	17.6118	24.5061
1700096K18Rik	-0.514321	0.375419	0.978328	20.0891	7.97982	9.24386	6.03065	4.81197	3.64259	10.8779	13.3669
Dock11	-0.513469	0.0208983	0.866547	77.678	138.317	76.87	103.727	75.7885	60.5994	57.4975	82.4295
Dcn	-0.512907	0.00230401	0.747015	171.427	175.556	150.334	120.613	109.472	106.96	93.2392	126.986
Trim12a	-0.512448	0.143025	0.94857	36.1605	39.8991	23.8394	24.1226	32.4808	17.2195	22.7918	8.91129
Ngef	-0.512328	0.19401	0.952987	84.3744	29.2594	27.7316	22.9165	21.6539	23.1801	31.0797	42.3287
NA	-0.512261	0.232704	0.961301	29.4641	21.2795	15.0821	9.64904	18.0449	13.9081	9.84191	8.91129
Lurap1l	-0.512043	0.244204	0.963218	54.9103	42.5591	14.5956	14.4736	12.0299	21.5244	24.8638	26.7339
Slc30a10	-0.511349	0.142071	0.94857	91.0708	23.9395	33.5698	60.3065	40.9017	45.3668	25.8998	35.6452
Moxd1	-0.511299	0.31153	0.976482	14.732	21.2795	12.163	3.61839	9.62394	8.27861	6.73394	11.1391
Klf8	-0.511008	0.242044	0.963218	32.1426	7.97982	18.4877	10.8552	10.8269	11.59	12.4319	17.8226
Pcgf5	-0.510927	0.0400934	0.866547	41.5176	103.738	65.1935	72.3678	51.7287	48.3471	41.4396	53.4678
Phlda3	-0.510884	0.18071	0.950533	124.553	39.8991	35.5159	32.5655	38.4957	33.4456	52.3175	37.873
Zbed4	-0.510823	0.0761238	0.896453	24.107	47.8789	36.4889	36.1839	25.2628	25.8292	21.2378	28.9617
Ctsc	-0.510312	0.0792069	0.896453	38.839	42.5591	35.5159	27.741	32.4808	19.5375	25.8998	24.5061
Zfp738	-0.510296	0.00324417	0.747015	137.945	202.156	164.93	168.858	147.968	116.232	95.8292	111.391
Riiad1	-0.509133	0.367789	0.978328	13.3928	13.2997	5.83823	14.4736	14.4359	9.60318	4.14396	2.22782
Rasgrp2	-0.506718	0.161221	0.949956	133.928	29.2594	44.2732	43.4207	43.3077	41.0619	49.2096	44.5565
Tmsb15l	-0.506533	0.232561	0.961301	20.0891	29.2594	12.163	10.8552	9.62394	12.5835	12.4319	11.1391
Sema3d	-0.506277	0.0400923	0.866547	85.7137	61.1787	56.9227	44.6268	49.3227	36.757	42.9936	49.0121
Ankub1	-0.506146	0.0933008	0.901233	36.1605	31.9193	30.6507	36.1839	20.4509	17.8818	26.4178	35.6452
Lamp5	-0.505364	0.581415	0.988634	42.8568	29.2594	13.136	3.61839	4.81197	10.9278	37.8137	6.68347
Dzip1	-0.505104	0.00142813	0.723298	420.533	305.893	279.262	253.287	208.118	223.853	234.652	213.871
Creg2	-0.504715	0.171277	0.949956	136.606	53.1988	36.0024	38.5962	38.4957	41.7242	59.0515	44.5565
Gm37181	-0.503367	0.0945498	0.901753	46.8747	109.058	94.3847	110.964	92.6304	76.4943	41.4396	40.1008
Pros1	-0.50336	0.0349837	0.866547	99.1064	148.957	75.8969	61.5127	68.5705	62.5863	62.6774	69.0625
Ccdc40	-0.502447	0.398453	0.981601	22.7677	18.6196	7.29778	3.61839	15.6389	6.62288	9.32392	2.22782
Gm28661	-0.502213	0.61278	0.990742	899.994	103.738	401.865	67.5433	67.3675	331.144	91.1672	552.5
Gm26944	-0.501839	0.053048	0.874101	32.1426	50.5389	40.3811	51.8636	31.2778	28.8095	32.1157	28.9617
Gpr3	-0.500318	0.256614	0.969966	22.7677	10.6398	13.6225	14.4736	4.81197	10.5966	12.4319	17.8226
Csmd3	-0.500254	0.0966939	0.905133	166.07	66.4985	52.544	72.3678	61.3526	64.242	61.6415	64.6069
Fbln5	-0.499548	0.465059	0.983843	44.1961	204.815	50.598	32.5655	42.1047	40.3996	101.009	46.7843
Zmat4	-0.499447	0.127988	0.935569	121.874	58.5187	50.1114	39.8023	44.5107	33.4456	62.1595	51.2399
Rps27rt	-0.499162	0.441468	0.983843	32.1426	0	13.136	3.61839	6.01496	10.9278	8.28793	11.1391
Grip1	-0.498052	0.175354	0.949956	62.946	23.9395	18.0012	44.6268	25.2628	23.5112	26.9358	31.1895
Gm14597	-0.497832	0.1544	0.949956	81.6959	31.9193	38.9215	28.9471	25.2628	45.3668	29.5257	24.5061
Gm22865	-0.4978	0.280602	0.975338	12.0535	10.6398	9.73038	21.7104	13.2329	8.60975	8.28793	8.91129
Gm38253	-0.496626	0.247991	0.965017	9.37493	21.2795	18.4877	22.9165	16.8419	16.2261	8.80592	6.68347
Fkbp5	-0.496276	0.406258	0.983843	74.9995	87.7781	19.9473	18.092	40.9017	23.1801	34.1877	42.3287
Irf1	-0.495891	0.244023	0.963218	18.7499	45.219	13.136	14.4736	12.0299	13.9081	18.1298	13.3669
Fign	-0.495633	0.234267	0.961337	18.7499	10.6398	16.5416	14.4736	8.42094	13.2458	11.3959	8.91129
AW822252	-0.495182	0.193108	0.952987	21.4284	15.9596	14.5956	22.9165	10.8269	11.9212	15.0219	15.5948
Rpl14-ps1	-0.495164	0.381277	0.97921	18.7499	10.6398	15.5686	3.61839	3.60898	12.9146	5.69795	13.3669
Bbs10	-0.493801	0.115976	0.92184	28.1248	18.6196	27.7316	28.9471	19.2479	17.2195	20.2018	20.0504
Il34	-0.493714	0.189922	0.952987	53.5711	29.2594	19.9473	18.092	18.0449	24.5047	21.2378	17.8226
Pcsk1	-0.492873	0.0303509	0.866547	183.481	106.398	107.034	85.6353	81.8035	100.337	80.2893	75.746
Ptprf	-0.492411	0.087678	0.896453	202.231	109.058	72.0048	71.1617	84.2094	79.1435	69.9294	89.1129
Klhl13	-0.492087	0.0444585	0.866547	365.622	146.297	162.497	165.24	134.735	163.916	156.435	140.353
Cav1	-0.491887	0.0472087	0.866615	58.9282	63.8386	49.1384	36.1839	36.0898	36.757	32.1157	42.3287
Eya1	-0.491454	0.102315	0.908143	24.107	53.1988	32.5968	34.9778	22.8568	27.8161	20.2018	28.9617
Gm38393	-0.491381	0.00927937	0.844248	222.32	242.055	170.282	277.41	197.291	143.717	126.391	187.137
Tifab	-0.490081	0.372214	0.978328	16.0713	13.2997	6.32475	7.23678	4.81197	5.62945	10.8779	6.68347
Zfp975	-0.489843	0.0801415	0.896453	50.8925	23.9395	39.8945	51.8636	39.6987	30.7964	25.3818	26.7339
Gm3636	-0.489208	0.350055	0.978045	12.0535	2.65994	10.2169	16.8858	12.0299	8.27861	6.21595	4.45565
Adgrv1	-0.489197	0.349197	0.978045	21.4284	10.6398	8.75734	8.44291	3.60898	7.28517	12.4319	11.1391
Rab3il1	-0.488747	0.163193	0.949956	48.2139	23.9395	21.4068	26.5349	18.0449	18.8752	27.9718	17.8226
Apcdd1	-0.488656	0.102302	0.908143	32.1426	37.2392	27.7316	43.4207	33.6838	21.5244	21.2378	24.5061
Ggh	-0.488605	0.0270418	0.866547	120.535	103.738	71.0318	68.7494	66.1646	64.9043	65.2674	53.4678
Pld3	-0.488347	0.174089	0.949956	445.979	250.034	192.175	155.591	155.186	204.647	219.63	160.403
Cyb561	-0.487898	0.10821	0.916331	109.821	63.8386	52.0575	37.39	54.1346	37.7504	54.9075	37.873
Map9	-0.487738	0.00164186	0.747015	594.639	484.109	353.699	418.527	345.259	299.686	317.531	356.452
Triqk	-0.487633	0.131285	0.938381	92.4101	69.1585	31.6237	36.1839	34.8868	38.4127	39.8856	46.7843
Gm42047	-0.487622	0.123412	0.933869	26.7855	45.219	24.3259	25.3287	22.8568	21.5244	17.6118	20.0504
Trmt10a	-0.48644	0.0430793	0.866547	52.2318	39.8991	44.7597	59.1004	39.6987	33.7767	35.7417	31.1895
0610040F04Rik	-0.485331	0.330016	0.976482	6.69638	18.6196	11.1899	10.8552	7.21795	10.2655	7.76993	4.45565
Gm15777	-0.484893	0.288339	0.976079	5.35711	29.2594	21.4068	28.9471	12.0299	21.8555	11.9139	11.1391
Itgam	-0.484726	0.193833	0.952987	37.4997	61.1787	30.1642	15.6797	33.6838	25.4981	24.3458	11.1391
Cnbd2	-0.484465	0.0410877	0.866547	48.2139	58.5187	45.2463	48.2452	40.9017	32.121	34.7057	33.4174
Prkar2b	-0.483301	0.0739158	0.896453	154.017	71.8184	70.5452	59.1004	63.7586	63.2485	65.7854	60.1512
Rbp4	-0.482991	0.302278	0.976482	14.732	21.2795	14.5956	4.82452	8.42094	9.60318	9.32392	11.1391
Kl	-0.482903	0.66052	0.992181	72.3209	47.8789	33.5698	7.23678	21.6539	6.29174	83.3973	2.22782
Gm45844	-0.482583	0.124456	0.933869	20.0891	50.5389	36.0024	33.7717	28.8718	19.2064	27.9718	22.2782
Tenm3	-0.482532	0.169447	0.949956	112.499	31.9193	44.2732	32.5655	44.5107	38.4127	34.1877	44.5565
Col8a2	-0.482479	0.40575	0.983843	24.107	13.2997	14.5956	8.44291	14.4359	3.97373	20.7198	2.22782
Apool	-0.482195	0.208301	0.955078	21.4284	10.6398	21.8933	34.9778	20.4509	11.59	19.6838	15.5948
Oasl2	-0.482152	0.180421	0.950533	62.946	69.1585	37.462	26.5349	26.4658	22.5178	55.9435	28.9617
Hebp1	-0.481302	0.0974669	0.905368	61.6067	63.8386	27.7316	56.6881	34.8868	33.7767	36.7777	40.1008
Gm12669	-0.481246	0.306842	0.976482	18.7499	13.2997	14.5956	7.23678	7.21795	12.9146	9.32392	6.68347
Abcb4	-0.481126	0.212371	0.956076	28.1248	15.9596	16.0551	15.6797	15.6389	13.2458	14.5039	8.91129
Epha6	-0.481085	0.214855	0.957959	30.8034	18.6196	17.0282	21.7104	20.4509	16.5572	8.80592	20.0504
Bace2	-0.480956	0.341749	0.976482	8.03566	18.6196	14.5956	6.03065	8.42094	7.94746	10.3599	4.45565
Lpcat2	-0.480942	0.10237	0.908143	79.0173	50.5389	49.6249	33.7717	38.4957	40.3996	46.1016	20.0504
Pdcd5-ps	-0.480925	0.290679	0.976482	18.7499	10.6398	12.163	10.8552	14.4359	7.61632	8.28793	8.91129
Cxcr4	-0.48087	0.325451	0.976482	16.0713	7.97982	9.73038	9.64904	9.62394	5.9606	8.28793	8.91129
Tenm2	-0.480038	0.0641215	0.882522	139.285	87.7781	57.8957	71.1617	52.9316	66.2288	66.3034	64.6069
Vwa5a	-0.479987	0.0304804	0.866547	175.445	162.256	97.3038	90.4598	98.6453	95.3695	92.7212	77.9738
Zfp729a	-0.479162	0.00579967	0.822451	131.249	127.677	127.954	154.385	109.472	91.3958	80.2893	120.302
Mgp	-0.478824	0.1688	0.949956	45.5354	50.5389	36.0024	24.1226	24.0598	16.8884	26.4178	51.2399
Magi3	-0.478192	0.0394079	0.866547	219.641	122.357	122.116	90.4598	108.269	91.727	95.8292	104.708
Lair1	-0.47778	0.0397444	0.866547	77.678	98.4178	56.9227	57.8943	46.9167	44.7045	50.2456	64.6069
Itpripl2	-0.477643	0.102762	0.908143	40.1783	45.219	30.1642	26.5349	22.8568	24.1735	21.7558	33.4174
Filip1	-0.477101	0.253558	0.969274	18.7499	23.9395	13.6225	16.8858	7.21795	17.5506	11.3959	11.1391
Dlx1as	-0.477	0.220042	0.957959	12.0535	31.9193	22.8664	25.3287	20.4509	18.5441	9.32392	17.8226
Fam196b	-0.476634	0.113164	0.917415	60.2674	34.5792	26.272	49.4514	32.4808	29.1407	31.5977	26.7339
Nek7	-0.476462	0.0182524	0.866547	460.711	305.893	237.908	217.104	206.915	212.595	236.724	216.099
1700007J10Rik	-0.475954	0.362365	0.978328	12.0535	7.97982	12.163	12.0613	8.42094	11.2589	3.10797	11.1391
Lingo2	-0.474726	0.301753	0.976482	37.4997	13.2997	14.5956	10.8552	8.42094	17.8818	10.8779	17.8226
Nxph1	-0.474716	0.130157	0.938381	168.749	71.8184	49.1384	78.3985	73.3825	73.514	65.7854	46.7843
Enpp2	-0.474286	0.452047	0.983843	4311.13	2471.09	2579.52	985.409	1673.36	1012.31	4013.43	746.321
Sytl2	-0.473339	0.0322596	0.866547	218.302	103.738	128.441	142.323	75.7885	115.569	122.247	113.619
Cep290	-0.471341	0.00346162	0.76702	183.481	210.135	148.388	170.064	145.562	126.828	125.873	98.0242
Uaca	-0.471268	0.0870342	0.896453	48.2139	29.2594	33.0833	44.6268	27.6688	31.4587	24.3458	28.9617
Gm14137	-0.470925	0.202815	0.954787	17.4106	29.2594	21.8933	16.8858	10.8269	16.8884	17.6118	11.1391
Tmem176a	-0.469906	0.280968	0.975338	46.8747	15.9596	24.8125	9.64904	18.0449	12.5835	23.3098	17.8226
Camk2a	-0.46985	0.273387	0.974496	748.655	268.654	220.88	265.349	277.891	310.944	252.782	242.833
Thap4	-0.469533	0.0710027	0.894412	57.5889	50.5389	40.3811	68.7494	37.2927	45.6979	38.8497	26.7339
Utp14b	-0.469516	0.0271305	0.866547	85.7137	162.256	90.006	100.109	78.1945	65.5666	77.6993	89.1129
Rab29	-0.469047	0.148979	0.948886	26.7855	26.5994	25.7855	31.3594	27.6688	20.5309	19.1658	8.91129
Tdrd6	-0.468612	0.289118	0.976079	17.4106	10.6398	12.6495	12.0613	10.8269	11.2589	8.28793	6.68347
Rarres2	-0.467998	0.189503	0.952987	38.839	18.6196	23.8394	32.5655	14.4359	18.5441	31.0797	15.5948
6430511E19Rik	-0.467808	0.0903614	0.898059	37.4997	47.8789	70.0587	75.9862	52.9316	46.3602	30.0437	44.5565
Zfp758	-0.467488	0.034754	0.866547	112.499	69.1585	84.1678	88.0475	83.0064	52.9831	54.3895	77.9738
Hexb	-0.467428	0.012347	0.866547	482.139	675.625	451.003	312.388	353.68	316.243	400.928	300.756
Ppp1r3b	-0.467409	0.40604	0.983843	22.7677	10.6398	10.7034	7.23678	14.4359	2.9803	10.8779	11.1391
Gm13577	-0.467251	0.0842092	0.896453	50.8925	29.2594	38.9215	34.9778	30.0748	30.1341	24.8638	28.9617
Zfp52	-0.467001	0.119325	0.925748	37.4997	95.7579	41.8406	36.1839	39.6987	34.7701	36.7777	31.1895
Angptl2	-0.466614	0.313103	0.976482	14.732	23.9395	16.0551	12.0613	10.8269	17.5506	10.8779	2.22782
Sox11	-0.466594	0.312817	0.976482	38.839	7.97982	11.6765	14.4736	10.8269	13.2458	13.9859	15.5948
Igf2	-0.466134	0.00261495	0.747015	285.266	300.573	272.937	202.63	202.103	166.897	218.594	173.77
Rasgef1b	-0.46581	0.0763455	0.896453	79.0173	74.4784	45.7328	54.2759	32.4808	48.6782	54.9075	35.6452
Zfp955a	-0.465806	0.0440788	0.866547	65.6245	66.4985	55.9497	49.4514	32.4808	48.6782	43.5116	40.1008
Plekhf2	-0.465757	0.105726	0.916331	29.4641	31.9193	33.5698	37.39	21.6539	20.5309	25.3818	33.4174
Gpx8	-0.465673	0.317687	0.976482	20.0891	21.2795	19.4608	6.03065	16.8419	9.60318	15.0219	4.45565
Gm45591	-0.46507	0.337859	0.976482	10.7142	13.2997	14.5956	15.6797	15.6389	4.96716	8.28793	15.5948
Psme2b	-0.464912	0.295011	0.976482	18.7499	10.6398	12.163	18.092	12.0299	9.27204	15.0219	4.45565
Cfap69	-0.464551	0.021514	0.866547	124.553	106.398	86.6004	84.4291	76.9915	58.2814	78.7353	77.9738
Gm37570	-0.464304	0.368031	0.978328	6.69638	13.2997	13.6225	22.9165	2.40598	14.2392	10.3599	13.3669
Ripk1	-0.46423	0.102831	0.908143	29.4641	39.8991	29.6777	34.9778	27.6688	23.8424	21.2378	22.2782
Ogn	-0.464128	0.0944618	0.901753	48.2139	77.1383	55.4632	37.39	34.8868	34.439	31.5977	62.3791
Gm12346	-0.464068	0.47607	0.985569	192.856	37.2392	99.7364	27.741	54.1346	69.2091	42.9936	95.7964
Pcdhb21	-0.463157	0.124916	0.933869	29.4641	21.2795	30.1642	31.3594	20.4509	19.5375	20.2018	26.7339
Cdkn1c	-0.463071	0.267808	0.971476	26.7855	21.2795	12.163	18.092	13.2329	12.2523	19.1658	6.68347
Crip2	-0.462363	0.0984613	0.905368	62.946	74.4784	44.2732	31.3594	33.6838	38.0816	43.5116	28.9617
Gm6210	-0.462094	0.436726	0.983843	13.3928	5.31988	10.7034	6.03065	3.60898	9.93433	7.76993	2.22782
Il33	-0.461298	0.0290176	0.866547	644.192	345.792	298.723	305.151	315.184	264.915	299.919	276.25
Ier5l	-0.461248	0.440679	0.983843	21.4284	18.6196	4.86519	4.82452	3.60898	6.95403	11.9139	11.1391
Slc37a2	-0.460888	0.301581	0.976482	21.4284	31.9193	18.0012	10.8552	15.6389	13.5769	20.7198	2.22782
Ptgs1	-0.460572	0.158347	0.949956	54.9103	31.9193	25.7855	26.5349	30.0748	25.4981	25.3818	15.5948
Slitrk3	-0.460264	0.0867039	0.896453	104.464	55.8588	46.2193	57.8943	45.7137	54.3077	42.4756	46.7843
Pcdhb6	-0.460134	0.209625	0.955078	28.1248	18.6196	23.3529	15.6797	13.2329	20.1998	13.9859	13.3669
Adap2	-0.459108	0.282933	0.975705	12.0535	34.5792	16.5416	14.4736	16.8419	11.2589	8.80592	20.0504
Tpt1-ps3	-0.458973	0.188864	0.952987	85.7137	39.8991	60.8149	22.9165	26.4658	48.6782	31.0797	49.0121
Opalin	-0.458748	0.105454	0.916331	74.9995	45.219	42.3271	53.0697	21.6539	45.6979	45.0656	40.1008
Bmp6	-0.458646	0.184426	0.952905	54.9103	69.1585	28.7046	20.5042	24.0598	27.8161	35.7417	31.1895
1700003E16Rik	-0.458589	0.342564	0.976482	32.1426	2.65994	12.6495	15.6797	8.42094	10.5966	13.9859	15.5948
E130114P18Rik	-0.45827	0.130369	0.938381	54.9103	39.8991	29.1911	33.7717	37.2927	21.5244	29.0077	26.7339
Arap3	-0.458163	0.235588	0.961337	21.4284	13.2997	20.9203	18.092	20.4509	10.9278	15.0219	8.91129
Shc3	-0.458089	0.224811	0.961292	38.839	23.9395	16.0551	24.1226	12.0299	23.8424	17.0938	17.8226
Zfp628	-0.457888	0.132335	0.938381	42.8568	34.5792	23.3529	42.2146	20.4509	24.5047	27.9718	28.9617
6430550D23Rik	-0.457835	0.329054	0.976482	12.0535	18.6196	10.2169	9.64904	8.42094	8.94089	6.21595	13.3669
Mslnl	-0.456599	0.362503	0.978328	5.35711	15.9596	12.163	12.0613	12.0299	5.62945	7.76993	8.91129
Per2	-0.456261	0.0292018	0.866547	287.944	263.334	204.824	265.349	146.765	164.248	148.147	300.756
Myd88	-0.455351	0.227672	0.961301	28.1248	13.2997	23.3529	14.4736	19.2479	13.5769	15.5399	11.1391
Dock2	-0.455118	0.209046	0.955078	17.4106	34.5792	19.9473	16.8858	18.0449	15.5638	15.0219	11.1391
Gm37069	-0.454237	0.410788	0.983843	24.107	13.2997	6.81126	6.03065	7.21795	5.9606	12.9499	8.91129
Id1	-0.453842	0.215277	0.957959	48.2139	21.2795	20.9203	19.2981	15.6389	19.2064	23.8278	20.0504
Oscp1	-0.45313	0.055848	0.874101	124.553	87.7781	69.5722	68.7494	64.9616	66.56	71.4834	42.3287
Vsir	-0.452976	0.0426667	0.866547	104.464	77.1383	71.0318	66.3372	40.9017	65.2354	61.6415	60.1512
Gm42517	-0.452285	0.226658	0.961301	18.7499	26.5994	13.6225	27.741	15.6389	13.9081	14.5039	17.8226
Ccdc13	-0.452147	0.233487	0.961337	17.4106	21.2795	20.9203	16.8858	14.4359	13.5769	17.6118	6.68347
Ptpn13	-0.451895	0.0244816	0.866547	117.856	93.0979	83.1947	100.109	87.8184	75.832	67.3394	49.0121
Rsl1	-0.451867	0.217235	0.957959	14.732	29.2594	24.3259	19.2981	21.6539	14.5703	11.9139	17.8226
Isoc2b	-0.451493	0.299652	0.976482	10.7142	26.5994	24.3259	12.0613	7.21795	16.2261	16.0579	11.1391
Gm11808	-0.451393	0.504497	0.98668	33.4819	5.31988	11.6765	2.41226	4.81197	12.5835	4.14396	20.0504
Plekhh2	-0.451078	0.0500097	0.871226	69.6424	69.1585	56.9227	65.1311	46.9167	52.6519	51.7995	26.7339
Abca4	-0.45085	0.338829	0.976482	22.7677	21.2795	13.6225	6.03065	8.42094	8.60975	16.0579	11.1391
Fdxacb1	-0.450288	0.118235	0.924739	26.7855	50.5389	33.0833	48.2452	21.6539	31.1276	29.0077	28.9617
Gm6180	-0.450204	0.291824	0.976482	32.1426	15.9596	14.109	10.8552	13.2329	13.9081	9.84191	17.8226
Ska3	-0.449801	0.345872	0.976482	12.0535	7.97982	13.136	9.64904	10.8269	7.61632	6.73394	8.91129
Abca9	-0.44978	0.115082	0.921161	62.946	93.0979	61.3014	30.1533	45.7137	40.7307	36.7777	57.9234
Ccdc138	-0.449496	0.303618	0.976482	16.0713	18.6196	9.24386	16.8858	8.42094	9.27204	10.8779	15.5948
Adgre5	-0.449345	0.178698	0.950531	22.7677	31.9193	22.3799	25.3287	21.6539	18.5441	19.6838	8.91129
Chdh	-0.449337	0.168241	0.949956	34.8212	34.5792	31.1372	15.6797	25.2628	19.5375	21.2378	17.8226
Gm37893	-0.449122	0.0923129	0.899564	46.8747	50.5389	45.2463	38.5962	42.1047	24.5047	31.5977	40.1008
Mroh7	-0.448665	0.310411	0.976482	13.3928	7.97982	14.109	14.4736	10.8269	7.94746	10.8779	8.91129
Kcnk2	-0.448406	0.0723988	0.896453	139.285	85.1181	60.3283	82.0169	75.7885	66.8911	55.9435	69.0625
Gm43593	-0.448242	0.412036	0.983843	4.01783	15.9596	12.6495	10.8552	8.42094	11.2589	4.14396	6.68347
Irx2	-0.448004	0.131593	0.938381	57.5889	37.2392	35.0294	28.9471	26.4658	24.1735	28.4897	42.3287
Lama4	-0.446719	0.32163	0.976482	26.7855	5.31988	13.136	16.8858	18.0449	10.2655	10.3599	8.91129
Ltbp4	-0.446691	0.258468	0.969966	45.5354	26.5994	37.9485	13.2674	15.6389	32.121	25.3818	13.3669
Gng4	-0.446254	0.323656	0.976482	65.6245	18.6196	16.5416	14.4736	16.8419	23.8424	23.8278	17.8226
Cox16	-0.44611	0.0443531	0.866547	54.9103	63.8386	62.2744	71.1617	57.7436	38.7439	47.1376	44.5565
Tmem107	-0.445767	0.220945	0.957959	25.4462	23.9395	20.9203	18.092	10.8269	17.2195	20.7198	11.1391
Gm26909	-0.445408	0.364047	0.978328	16.0713	13.2997	17.0282	16.8858	21.6539	14.5703	4.14396	6.68347
Cd37	-0.445361	0.328922	0.976482	16.0713	45.219	10.2169	16.8858	12.0299	10.9278	18.6478	17.8226
Hipk4	-0.445115	0.136081	0.944839	99.1064	42.5591	45.2463	37.39	44.5107	42.3865	39.3677	37.873
Cdk14	-0.445051	0.0544008	0.874101	538.389	300.573	237.908	218.31	224.959	251.67	260.034	207.188
Tap1	-0.445028	0.387264	0.97921	20.0891	39.8991	11.1899	6.03065	15.6389	11.9212	17.0938	4.45565
Vps13a	-0.444799	0.0103206	0.855889	567.853	529.328	455.382	508.987	479.994	381.478	246.566	414.375
Nov	-0.444749	0.275078	0.975027	58.9282	53.1988	32.5968	15.6797	27.6688	17.5506	22.2738	55.6956
Zim1	-0.444662	0.20549	0.955078	129.91	34.5792	46.7058	54.2759	56.5406	33.1144	44.0296	69.0625
Nmi	-0.444558	0.0912775	0.89827	49.5532	58.5187	35.0294	47.0391	32.4808	34.1079	38.3317	24.5061
Gm16052	-0.444466	0.369923	0.978328	6.69638	10.6398	10.7034	14.4736	9.62394	5.9606	7.25194	11.1391
Gm9892	-0.444124	0.393405	0.97921	22.7677	13.2997	8.75734	7.23678	12.0299	7.94746	5.17995	15.5948
Rimklb	-0.443776	0.0146903	0.866547	255.802	239.395	144.496	188.156	140.75	157.956	141.413	158.175
Gm42756	-0.443771	0.170409	0.949956	52.2318	15.9596	31.6237	28.9471	28.8718	25.4981	22.2738	20.0504
Tspo	-0.442523	0.160071	0.949956	33.4819	31.9193	22.8664	31.3594	14.4359	20.8621	25.3818	24.5061
Ahi1	-0.441713	0.0155591	0.866547	1293.74	821.922	626.15	704.38	653.225	619.902	641.796	617.107
Gm8797	-0.441641	0.316952	0.976482	20.0891	13.2997	11.6765	12.0613	13.2329	7.28517	10.3599	13.3669
F2r	-0.441471	0.322107	0.976482	30.8034	18.6196	9.73038	15.6797	18.0449	15.2326	9.84191	8.91129
Gsta3	-0.441254	0.364484	0.978328	8.03566	10.6398	9.73038	19.2981	10.8269	9.27204	8.80592	4.45565
Gm28551	-0.440746	0.374733	0.978328	13.3928	5.31988	13.136	9.64904	6.01496	9.93433	8.28793	6.68347
Gm10167	-0.440345	0.227124	0.961301	24.107	18.6196	20.4338	15.6797	16.8419	11.59	16.0579	15.5948
Prkag2os2	-0.440035	0.204826	0.955078	25.4462	34.5792	32.5968	47.0391	28.8718	35.4324	13.4679	24.5061
Apbb1ip	-0.439351	0.281926	0.975338	21.4284	21.2795	13.6225	13.2674	9.62394	9.60318	14.5039	17.8226
Pcdh15	-0.439334	0.17855	0.950531	87.053	45.219	33.0833	31.3594	40.9017	38.0816	29.0077	35.6452
Gm42549	-0.439289	0.178974	0.950533	25.4462	18.6196	34.0563	41.0084	32.4808	21.5244	17.6118	22.2782
Gm26606	-0.43804	0.333497	0.976482	6.69638	15.9596	13.136	16.8858	12.0299	8.60975	8.28793	11.1391
Shisa7	-0.437573	0.0788766	0.896453	140.624	66.4985	66.6531	75.9862	61.3526	70.8649	57.4975	69.0625
Lyplal1	-0.436814	0.382575	0.97921	17.4106	29.2594	5.83823	13.2674	8.42094	8.60975	13.9859	13.3669
Rpgrip1l	-0.436723	0.0436037	0.866547	187.499	178.216	129.414	101.315	143.156	110.933	90.1312	89.1129
Zfp40	-0.436607	0.0282667	0.866547	108.481	95.7579	77.3565	101.315	84.2094	63.2485	61.1235	77.9738
Herc6	-0.436605	0.141784	0.94857	65.6245	37.2392	33.0833	30.1533	25.2628	31.1276	31.5977	33.4174
E130311K13Rik	-0.436596	0.19815	0.952987	22.7677	18.6196	24.8125	34.9778	14.4359	15.8949	23.3098	24.5061
Gm37303	-0.436559	0.176009	0.949956	32.1426	21.2795	32.5968	30.1533	19.2479	26.1604	15.0219	31.1895
Iqub	-0.436124	0.235368	0.961337	20.0891	29.2594	21.4068	16.8858	13.2329	12.9146	21.7558	13.3669
Ctsd	-0.435499	0.137366	0.946337	1332.58	1816.74	1367.12	736.946	1016.53	910.647	1193.46	755.232
Rgs2	-0.434462	0.0892252	0.896453	210.266	140.977	90.006	95.2843	116.69	88.7467	109.815	73.5182
Arhgap11a	-0.434262	0.167826	0.949956	28.1248	37.2392	24.8125	25.3287	21.6539	16.2261	23.8278	22.2782
P2ry1	-0.434032	0.0837713	0.896453	77.678	58.5187	44.2732	53.0697	45.7137	36.757	49.7276	35.6452
Gm44250	-0.433723	0.255467	0.969966	41.5176	50.5389	32.1102	21.7104	28.8718	14.9015	42.9936	15.5948
Tmie	-0.433481	0.140285	0.948172	66.9638	31.9193	44.2732	32.5655	39.6987	29.1407	38.3317	22.2782
Khdrbs2	-0.433071	0.152535	0.949956	42.8568	34.5792	32.5968	33.7717	22.8568	35.1013	25.3818	15.5948
Ace	-0.433	0.151862	0.949538	64.2853	50.5389	41.3541	34.9778	18.0449	32.4521	45.0656	44.5565
Cebpd	-0.432663	0.396516	0.98122	9.37493	13.2997	9.24386	8.44291	4.81197	5.62945	8.80592	11.1391
D630003M21Rik	-0.43262	0.369498	0.978328	18.7499	10.6398	11.1899	14.4736	2.40598	13.2458	10.8779	13.3669
Serhl	-0.432467	0.17232	0.949956	25.4462	29.2594	26.7585	27.741	16.8419	22.5178	22.7918	13.3669
Pard3	-0.432148	0.0573043	0.874101	95.0886	90.438	70.5452	84.4291	50.5257	81.7926	61.1235	44.5565
Upp2	-0.431426	0.0288858	0.866547	95.0886	63.8386	78.8161	80.8108	52.9316	59.606	67.3394	55.6956
Mdfic	-0.430852	0.189979	0.952987	28.1248	37.2392	27.2451	21.7104	21.6539	14.9015	26.4178	20.0504
Nudt14	-0.430846	0.26811	0.971476	21.4284	21.2795	13.6225	20.5042	10.8269	17.2195	10.8779	15.5948
Cyp7b1	-0.430442	0.115657	0.92184	44.1961	37.2392	33.5698	32.5655	33.6838	25.4981	24.3458	26.7339
Rorb	-0.430344	0.096284	0.904138	104.464	53.1988	68.1126	44.6268	45.7137	53.9765	54.9075	44.5565
Wnk3	-0.430145	0.0524219	0.874101	381.694	175.556	167.362	218.31	186.464	177.162	161.615	175.998
Catip	-0.429268	0.46288	0.983843	12.0535	13.2997	11.1899	4.82452	6.01496	2.9803	12.9499	8.91129
Cbfb	-0.42884	0.0156437	0.866547	166.07	188.856	131.847	119.407	101.051	100.668	126.391	111.391
Cd274	-0.428676	0.385852	0.97921	12.0535	37.2392	14.109	8.44291	8.42094	7.61632	18.1298	15.5948
Gcnt1	-0.428576	0.113285	0.917415	52.2318	53.1988	41.8406	51.8636	40.9017	30.7964	48.1736	20.0504
Pld1	-0.42813	0.107749	0.916331	58.9282	63.8386	42.3271	39.8023	48.1197	28.4784	39.3677	33.4174
Wdr78	-0.428066	0.165061	0.949956	83.0351	31.9193	48.6519	28.9471	38.4957	37.4193	36.7777	31.1895
Pcdhb8	-0.428051	0.145602	0.94857	50.8925	34.5792	45.7328	25.3287	34.8868	25.4981	34.1877	22.2782
Ndufaf2	-0.427905	0.111711	0.917325	186.159	95.7579	99.7364	61.5127	95.0364	80.7992	84.4333	66.8347
2810428J06Rik	-0.427498	0.438709	0.983843	10.7142	10.6398	8.75734	9.64904	2.40598	11.59	6.21595	6.68347
Rerg	-0.426582	0.448337	0.983843	36.1605	26.5994	6.32475	4.82452	18.0449	9.60318	13.4679	11.1391
Flrt2	-0.426466	0.0340599	0.866547	99.1064	71.8184	70.5452	73.574	62.5556	60.2682	52.3175	60.1512
Zfp879	-0.42609	0.278441	0.975338	13.3928	21.2795	14.109	20.5042	14.4359	11.2589	10.8779	15.5948
Cyp2j6	-0.425704	0.131331	0.938381	167.41	82.4582	66.1666	73.574	75.7885	71.196	87.0232	49.0121
Pou3f4	-0.425397	0.327636	0.976482	41.5176	18.6196	16.0551	10.8552	10.8269	19.2064	18.1298	13.3669
Rcn2	-0.425305	0.0165139	0.866547	625.442	537.308	329.86	385.962	350.071	352.669	365.705	314.123
Fgf13	-0.425261	0.148963	0.948886	84.3744	87.7781	40.8676	47.0391	30.0748	55.9634	42.9936	57.9234
1110025M09Rik	-0.425176	0.523356	0.987859	1.33928	23.9395	8.75734	10.8552	7.21795	11.59	8.80592	0
Prob1	-0.42504	0.290552	0.976482	41.5176	21.2795	17.0282	26.5349	21.6539	21.1932	25.3818	4.45565
Irf7	-0.425013	0.44914	0.983843	17.4106	15.9596	14.109	2.41226	7.21795	7.61632	15.0219	4.45565
Rad9b	-0.424051	0.192667	0.952987	34.8212	34.5792	21.4068	21.7104	20.4509	17.2195	20.7198	24.5061
Gm44898	-0.423705	0.286102	0.976079	24.107	13.2997	13.136	37.39	18.0449	14.9015	16.0579	17.8226
Gm14418	-0.423554	0.144127	0.94857	46.8747	29.2594	38.9215	32.5655	18.0449	26.1604	31.0797	40.1008
Gm10275	-0.423412	0.639187	0.991617	42.8568	7.97982	28.7046	3.61839	3.60898	31.7898	12.9499	13.3669
Cdo1	-0.423248	0.0964006	0.904138	73.6602	66.4985	46.2193	50.6575	34.8868	41.393	55.4255	35.6452
Gm37755	-0.42297	0.368915	0.978328	17.4106	10.6398	10.7034	16.8858	14.4359	7.94746	6.21595	17.8226
Alpk1	-0.422594	0.233417	0.961337	32.1426	23.9395	21.4068	27.741	19.2479	21.1932	11.3959	31.1895
Gm28941	-0.42258	0.312357	0.976482	12.0535	21.2795	13.136	25.3287	14.4359	14.9015	8.28793	15.5948
Pdlim1	-0.422451	0.158547	0.949956	42.8568	71.8184	36.0024	27.741	25.2628	31.1276	37.8137	28.9617
Lrp5	-0.422067	0.184005	0.952662	48.2139	61.1787	33.0833	26.5349	33.6838	33.4456	33.6697	13.3669
Mthfs	-0.420825	0.185587	0.952987	25.4462	23.9395	30.6507	24.1226	14.4359	22.5178	19.6838	22.2782
Slc9b1	-0.420812	0.340579	0.976482	13.3928	15.9596	12.163	10.8552	8.42094	8.27861	11.9139	8.91129
Srp19	-0.420599	0.0216102	0.866547	241.07	170.236	159.578	176.095	129.923	135.107	174.046	106.936
Gstt3	-0.420557	0.220275	0.957959	25.4462	34.5792	17.0282	24.1226	18.0449	16.5572	16.5759	22.2782
Gm12338	-0.420542	0.274269	0.974788	32.1426	29.2594	25.7855	16.8858	8.42094	28.1473	16.0579	22.2782
Ifitm3	-0.420394	0.178995	0.950533	70.9816	47.8789	38.435	31.3594	30.0748	24.1735	45.0656	42.3287
Tm4sf1	-0.420168	0.159659	0.949956	50.8925	77.1383	32.5968	59.1004	32.4808	39.4062	52.3175	26.7339
Alcam	-0.420093	0.0535807	0.874101	494.193	276.634	237.908	224.34	205.712	208.621	240.35	269.567
Gm10827	-0.420093	0.368038	0.978328	9.37493	42.5591	28.7046	10.8552	21.6539	13.9081	9.84191	24.5061
Kirrel	-0.419998	0.11578	0.92184	72.3209	47.8789	39.408	47.0391	32.4808	46.029	36.2597	33.4174
D11Wsu47e	-0.419989	0.236799	0.96139	40.1783	23.9395	28.7046	15.6797	13.2329	25.167	19.6838	22.2782
Rxra	-0.419943	0.0479982	0.870262	127.231	93.0979	69.5722	88.0475	68.5705	74.1763	65.2674	69.0625
Gm44524	-0.419105	0.372761	0.978328	9.37493	13.2997	14.109	13.2674	13.2329	11.59	5.69795	6.68347
Rgs12	-0.418968	0.158769	0.949956	69.6424	74.4784	39.408	32.5655	38.4957	45.3668	40.9216	24.5061
Gm36989	-0.418734	0.118255	0.924739	34.8212	53.1988	39.8945	36.1839	33.6838	25.167	28.4897	37.873
Slc24a4	-0.418722	0.29925	0.976482	44.1961	13.2997	23.3529	20.5042	30.0748	11.59	20.2018	17.8226
2310009B15Rik	-0.418417	0.3865	0.97921	26.7855	13.2997	13.6225	18.092	3.60898	10.2655	23.3098	15.5948
Plek	-0.41837	0.042989	0.866547	170.088	268.654	154.226	129.056	145.562	116.232	152.291	109.163
4632404M16Rik	-0.417831	0.456359	0.983843	10.7142	13.2997	7.7843	19.2981	6.01496	8.27861	4.14396	24.5061
6720489N17Rik	-0.41761	0.345966	0.976482	29.4641	26.5994	14.109	7.23678	16.8419	9.93433	14.5039	15.5948
Bcas1	-0.416086	0.0344461	0.866547	1806.68	1303.37	1046.02	809.314	939.537	850.71	1129.23	790.877
Thrb	-0.416052	0.0770599	0.896453	96.4279	74.4784	65.1935	48.2452	62.5556	47.3536	52.8355	49.0121
Gm1043	-0.41511	0.353042	0.978045	37.4997	7.97982	13.136	16.8858	10.8269	16.5572	11.3959	20.0504
Gm43339	-0.415085	0.339965	0.976482	9.37493	13.2997	15.5686	20.5042	6.01496	12.9146	11.9139	13.3669
Gm31166	-0.414925	0.227475	0.961301	29.4641	34.5792	27.2451	20.5042	18.0449	15.8949	30.0437	15.5948
Klhdc7a	-0.414841	0.162327	0.949956	121.874	66.4985	62.2744	36.1839	61.3526	46.3602	55.9435	51.2399
Cyp1b1	-0.414722	0.213986	0.957959	22.7677	26.5994	22.3799	26.5349	25.2628	18.5441	13.9859	15.5948
1700018L02Rik	-0.413996	0.362998	0.978328	8.03566	15.9596	12.163	13.2674	10.8269	9.60318	8.28793	6.68347
H2-K1	-0.413657	0.0205857	0.866547	204.909	250.034	169.795	135.087	138.344	140.736	152.809	120.302
Arhgef28	-0.413428	0.177315	0.950531	66.9638	39.8991	29.6777	31.3594	32.4808	30.1341	34.1877	24.5061
Gm15903	-0.413294	0.417661	0.983843	12.0535	13.2997	13.6225	7.23678	4.81197	7.28517	7.25194	20.0504
Cacna2d4	-0.413018	0.416685	0.983843	8.03566	13.2997	11.1899	16.8858	13.2329	10.2655	9.84191	0
Rpl37rt	-0.412957	0.372913	0.978328	32.1426	13.2997	16.0551	6.03065	9.62394	13.9081	13.4679	13.3669
Sdr42e1	-0.412417	0.323371	0.976482	28.1248	23.9395	19.4608	7.23678	12.0299	14.9015	17.6118	11.1391
Thbs1	-0.412361	0.3272	0.976482	24.107	5.31988	20.4338	14.4736	16.8419	12.5835	10.3599	13.3669
3830406C13Rik	-0.411959	0.0271888	0.866547	148.66	122.357	113.845	127.85	105.863	103.317	103.599	57.9234
Plod2	-0.41152	0.0412408	0.866547	80.3566	143.637	85.6273	100.109	80.6005	70.5337	68.3754	82.4295
Slc16a14	-0.411087	0.250334	0.966507	13.3928	31.9193	25.299	28.9471	10.8269	18.5441	21.7558	22.2782
Zfp213	-0.410924	0.372844	0.978328	24.107	39.8991	14.109	12.0613	12.0299	18.5441	22.7918	4.45565
C230004F18Rik	-0.410576	0.0350315	0.866547	74.9995	85.1181	77.3565	101.315	57.7436	68.5469	57.4975	71.2904
5330417C22Rik	-0.410516	0.330816	0.976482	37.4997	15.9596	13.136	13.2674	14.4359	16.8884	13.4679	13.3669
Abcc9	-0.410277	0.238349	0.96139	28.1248	45.219	29.6777	19.2981	31.2778	22.5178	13.4679	24.5061
2810459M11Rik	-0.409847	0.132297	0.938381	48.2139	45.219	44.7597	34.9778	26.4658	40.3996	33.6697	22.2782
Gbe1	-0.409713	0.0868388	0.896453	92.4101	50.5389	62.2744	51.8636	51.7287	43.0487	55.4255	44.5565
Klhl11	-0.409413	0.0113494	0.866547	283.927	239.395	217.96	189.363	187.667	180.805	140.895	196.048
Fam126b	-0.409361	0.00062061	0.597731	1253.56	1119.84	1082.5	1296.59	1063.44	901.706	748.503	871.079
Abcg2	-0.409339	0.110799	0.916924	37.4997	82.4582	47.1923	50.6575	33.6838	37.7504	40.4036	46.7843
Xpnpep3	-0.409261	0.0819486	0.896453	60.2674	50.5389	92.9251	91.6659	72.1795	57.6191	52.8355	46.7843
Ccdc28a	-0.40886	0.0377708	0.866547	121.874	93.0979	77.843	95.2843	75.7885	78.8123	65.2674	66.8347
L3mbtl3	-0.408626	0.0822289	0.896453	56.2496	69.1585	49.1384	43.4207	33.6838	39.075	43.5116	42.3287
A330093E20Rik	-0.408609	0.4428	0.983843	5.35711	13.2997	6.81126	18.092	7.21795	6.95403	9.84191	6.68347
Atp7b	-0.407797	0.288108	0.976079	32.1426	10.6398	17.0282	32.5655	13.2329	21.5244	14.5039	22.2782
Hspg2	-0.407678	0.343944	0.976482	21.4284	29.2594	15.5686	14.4736	27.6688	10.5966	12.9499	6.68347
Slc25a18	-0.407375	0.0642263	0.882522	312.051	186.196	164.443	159.209	135.938	173.188	182.852	115.847
Pycard	-0.407165	0.375846	0.978328	13.3928	7.97982	11.1899	13.2674	7.21795	10.2655	8.28793	8.91129
Gm7816	-0.40711	0.505226	0.98668	25.4462	5.31988	13.136	2.41226	8.42094	7.94746	5.17995	17.8226
Gm44832	-0.407013	0.299069	0.976482	24.107	29.2594	29.1911	22.9165	32.4808	18.8752	8.28793	24.5061
Pqlc3	-0.406937	0.148137	0.94857	28.1248	37.2392	38.435	36.1839	22.8568	31.1276	22.7918	28.9617
Ahnak	-0.406296	0.0409447	0.866547	245.088	351.112	188.769	208.661	197.291	170.208	144.003	236.149
Gbp4	-0.406202	0.501826	0.98668	4.01783	47.8789	10.2169	7.23678	7.21795	9.60318	11.9139	20.0504
Ass1	-0.405874	0.305035	0.976482	81.6959	47.8789	32.1102	14.4736	37.2927	36.0947	34.1877	20.0504
Gm38020	-0.405696	0.0158482	0.866547	214.284	292.594	337.158	246.051	249.019	184.447	181.816	220.555
Crabp2	-0.405457	0.42722	0.983843	10.7142	2.65994	18.0012	13.2674	4.81197	10.5966	10.3599	11.1391
Fhod3	-0.405261	0.243529	0.963218	105.803	34.5792	56.9227	28.9471	28.8718	49.3405	50.2456	42.3287
Cep128	-0.404957	0.166158	0.949956	32.1426	45.219	26.272	31.3594	22.8568	25.167	21.7558	28.9617
Dbp	-0.404546	0.0268414	0.866547	188.838	188.856	137.198	202.63	111.878	133.12	119.657	182.682
Ptpro	-0.404544	0.290156	0.976482	46.8747	21.2795	13.6225	30.1533	20.4509	18.8752	20.7198	24.5061
Casp1	-0.404381	0.182594	0.950651	26.7855	29.2594	30.6507	37.39	28.8718	18.8752	21.2378	31.1895
D130043K22Rik	-0.404373	0.119986	0.925748	64.2853	42.5591	38.435	38.5962	37.2927	33.7767	32.1157	35.6452
Insc	-0.403975	0.408763	0.983843	25.4462	15.9596	14.5956	12.0613	2.40598	15.2326	19.1658	11.1391
Ifit3b	-0.403908	0.119371	0.925748	103.124	87.7781	69.5722	54.2759	43.3077	54.3077	82.3613	49.0121
Krt1	-0.403473	0.513959	0.987859	26.7855	7.97982	5.35171	6.03065	9.62394	3.64259	11.3959	11.1391
Dok5	-0.402487	0.166868	0.949956	45.5354	37.2392	35.0294	43.4207	25.2628	33.4456	38.8497	15.5948
Ccdc114	-0.402338	0.265646	0.971476	26.7855	15.9596	19.4608	18.092	14.4359	17.5506	15.5399	11.1391
Atr	-0.401799	0.0109088	0.866547	133.928	180.876	160.551	179.713	114.284	132.789	109.297	140.353
Nkx2-9	-0.401782	0.469267	0.983843	13.3928	13.2997	10.7034	2.41226	7.21795	6.95403	9.32392	4.45565
Crtac1	-0.40156	0.465135	0.983843	38.839	18.6196	10.7034	3.61839	12.0299	15.5638	16.0579	6.68347
Adhfe1	-0.401407	0.187178	0.952987	95.0886	69.1585	38.9215	34.9778	45.7137	45.3668	46.1016	35.6452
Grip2	-0.401291	0.268909	0.971476	84.3744	18.6196	37.462	28.9471	31.2778	39.7373	30.5617	26.7339
Gm44167	-0.400884	0.33519	0.976482	14.732	15.9596	16.5416	13.2674	8.42094	14.5703	11.3959	8.91129
Hpgds	-0.400585	0.193451	0.952987	50.8925	58.5187	27.2451	28.9471	33.6838	24.1735	31.5977	31.1895
Pxdn	-0.400567	0.138425	0.946337	68.3031	47.8789	40.3811	34.9778	44.5107	34.7701	32.6337	31.1895
Gm10226	-0.400287	0.389355	0.97921	13.3928	7.97982	10.2169	12.0613	8.42094	8.27861	8.28793	8.91129
Ctbs	-0.400242	0.160424	0.949956	49.5532	45.219	32.1102	33.7717	40.9017	28.4784	27.4538	20.0504
Tgm2	-0.399776	0.309672	0.976482	28.1248	45.219	41.8406	16.8858	33.6838	26.4915	29.0077	4.45565
Plpp2	-0.399739	0.39952	0.982245	28.1248	2.65994	16.5416	16.8858	9.62394	13.5769	18.1298	6.68347
Dnaic2	-0.399593	0.279429	0.975338	34.8212	69.1585	19.4608	22.9165	27.6688	23.8424	29.0077	20.0504
Dock10	-0.399539	0.0143468	0.866547	291.962	207.475	182.445	199.012	162.404	173.851	170.938	151.492
Hsf4	-0.399338	0.300191	0.976482	44.1961	29.2594	25.7855	9.64904	25.2628	18.5441	18.6478	20.0504
Kcns1	-0.399255	0.500011	0.98668	10.7142	5.31988	12.6495	4.82452	4.81197	7.94746	9.32392	2.22782
Clvs2	-0.398764	0.302569	0.976482	104.464	29.2594	34.0563	24.1226	30.0748	36.0947	39.8856	40.1008
Klhl5	-0.398626	0.0168096	0.866547	251.784	207.475	160.551	217.104	168.419	157.625	169.385	124.758
H2-Bl	-0.398449	0.34635	0.976847	12.0535	18.6196	13.6225	12.0613	10.8269	9.27204	11.9139	8.91129
Rcor2	-0.398223	0.434502	0.983843	10.7142	18.6196	7.7843	8.44291	4.81197	8.60975	9.84191	6.68347
Gm43481	-0.397946	0.127814	0.934979	29.4641	50.5389	45.7328	53.0697	39.6987	34.1079	32.6337	26.7339
Prss35	-0.397923	0.332821	0.976482	16.0713	10.6398	17.0282	21.7104	15.6389	14.2392	13.4679	4.45565
Pard3b	-0.397658	0.311401	0.976482	16.0713	10.6398	26.272	33.7717	18.0449	21.5244	17.0938	8.91129
Stum	-0.397482	0.140881	0.948172	91.0708	39.8991	47.1923	53.0697	40.9017	50.6651	36.7777	49.0121
Tcirg1	-0.397472	0.0888305	0.896453	64.2853	53.1988	49.6249	43.4207	44.5107	40.3996	38.3317	33.4174
Spry4	-0.397282	0.110253	0.916924	72.3209	58.5187	95.3577	98.9027	68.5705	77.4877	39.8856	69.0625
Cpne6	-0.397205	0.340068	0.976482	116.517	23.9395	33.5698	26.5349	32.4808	43.3799	45.5836	28.9617
Gm38562	-0.396903	0.278968	0.975338	32.1426	10.6398	25.7855	27.741	20.4509	13.5769	17.6118	31.1895
Pgap1	-0.39688	0.00498842	0.822451	425.89	420.271	313.805	382.343	330.823	276.837	248.12	316.351
Tfrc	-0.396781	0.00677715	0.835712	553.121	851.181	517.656	568.088	436.686	459.959	491.06	481.21
Senp8	-0.39672	0.134997	0.943101	79.0173	55.8588	46.2193	34.9778	43.3077	36.757	40.9216	42.3287
Gm44559	-0.396709	0.134593	0.943101	49.5532	53.1988	45.2463	75.9862	42.1047	43.3799	30.5617	60.1512
Tnfaip8	-0.396331	0.0552559	0.874101	76.3387	82.4582	60.8149	66.3372	55.3376	54.3077	54.9075	42.3287
9230114K14Rik	-0.396301	0.358643	0.978328	12.0535	18.6196	16.0551	16.8858	13.2329	13.2458	14.5039	2.22782
Slc45a3	-0.396163	0.531134	0.987859	10.7142	18.6196	8.27082	1.20613	3.60898	9.27204	7.76993	4.45565
Tmem47	-0.395661	0.000562197	0.597731	1054.01	1151.75	902.979	897.361	799.99	658.315	793.051	786.422
Gm2897	-0.395516	0.480637	0.986143	21.4284	7.97982	4.37867	13.2674	14.4359	6.62288	7.76993	6.68347
Gm6297	-0.395498	0.45566	0.983843	10.7142	2.65994	12.6495	14.4736	8.42094	9.27204	10.3599	2.22782
Nkain2	-0.395054	0.0672382	0.89196	176.784	103.738	90.979	114.582	80.6005	88.4155	107.225	89.1129
Atp2b4	-0.394969	0.0435208	0.866547	219.641	183.536	115.791	191.775	123.908	143.385	120.693	147.036
Gm16185	-0.39494	0.064309	0.882522	69.6424	71.8184	67.6261	59.1004	57.7436	51.9896	40.4036	57.9234
H2-M3	-0.394747	0.479685	0.986143	16.0713	13.2997	12.6495	2.41226	4.81197	7.94746	12.4319	6.68347
AV356131	-0.394568	0.38469	0.97921	13.3928	13.2997	18.9742	27.741	12.0299	19.8687	17.0938	2.22782
Igsf11	-0.394225	0.0594371	0.874101	119.196	122.357	92.4386	77.1924	76.9915	64.9043	95.3112	66.8347
Adamtsl3	-0.393834	0.44482	0.983843	14.732	26.5994	9.73038	8.44291	2.40598	10.2655	12.4319	17.8226
Rapgef4os2	-0.393231	0.367727	0.978328	16.0713	10.6398	13.6225	15.6797	9.62394	7.28517	14.5039	13.3669
Plpp1	-0.393105	0.243359	0.963218	95.0886	58.5187	32.5968	37.39	48.1197	43.711	47.6556	22.2782
Casp6	-0.392805	0.353725	0.978328	17.4106	13.2997	19.4608	12.0613	7.21795	9.93433	14.5039	20.0504
Cacng4	-0.392795	0.0360643	0.866547	154.017	207.475	173.687	114.582	116.69	106.297	120.693	155.948
Nbeal1	-0.392627	0.00168734	0.747015	545.085	662.325	568.741	589.798	548.564	418.566	392.641	443.337
Rpsa-ps10	-0.39252	0.482097	0.986143	38.839	13.2997	13.136	6.03065	4.81197	17.8818	8.80592	24.5061
Ntpcr	-0.392191	0.140517	0.948172	54.9103	58.5187	41.8406	44.6268	30.0748	46.6913	38.8497	24.5061
A230001M10Rik	-0.392026	0.324326	0.976482	22.7677	13.2997	15.5686	14.4736	12.0299	14.9015	12.4319	8.91129
2024-09-10	-0.391973	0.140853	0.948172	42.8568	31.9193	37.462	36.1839	33.6838	25.4981	30.5617	24.5061
Mcrip2	-0.391731	0.181591	0.950651	40.1783	45.219	26.7585	41.0084	33.6838	31.1276	25.8998	17.8226
Wdr25	-0.391512	0.263192	0.97132	24.107	26.5994	20.4338	20.5042	24.0598	13.5769	14.5039	20.0504
Mettl4	-0.391446	0.0780502	0.896453	53.5711	66.4985	52.544	59.1004	52.9316	42.0553	40.4036	37.873
Dusp4	-0.391437	0.190416	0.952987	28.1248	39.8991	35.0294	38.5962	19.2479	35.4324	23.8278	24.5061
Fam131c	-0.391052	0.405108	0.983843	18.7499	10.6398	12.163	15.6797	7.21795	16.2261	11.3959	4.45565
Grem1	-0.390622	0.317037	0.976482	20.0891	34.5792	13.6225	19.2981	19.2479	11.2589	17.0938	15.5948
Soat1	-0.390378	0.0247521	0.866547	210.266	175.556	151.794	126.644	140.75	125.173	112.405	126.986
Plag1	-0.389705	0.0998762	0.905368	44.1961	63.8386	63.734	51.8636	45.7137	35.1013	44.5476	51.2399
Cdh19	-0.389266	0.173997	0.949956	145.981	79.7982	62.2744	80.8108	98.6453	45.3668	70.9654	69.0625
Zfp711	-0.389006	0.114403	0.919451	107.142	71.8184	51.0845	82.0169	72.1795	56.6257	57.4975	46.7843
Akap13	-0.388395	0.116741	0.921877	88.3922	93.0979	61.7879	57.8943	81.8035	48.6782	46.1016	51.2399
Idh1	-0.388145	0.0484777	0.871226	283.927	180.876	140.117	174.889	141.953	147.359	154.363	147.036
Col8a1	-0.387571	0.60562	0.990742	22.7677	13.2997	13.6225	1.20613	12.0299	1.32458	20.2018	4.45565
Det1	-0.386956	0.222442	0.957959	34.8212	42.5591	24.3259	26.5349	30.0748	25.4981	21.2378	13.3669
Zmym1	-0.386384	0.077126	0.896453	145.981	180.876	144.01	113.376	151.577	92.3892	78.2173	131.442
Dync2h1	-0.385943	0.025043	0.866547	352.23	281.954	236.448	311.182	245.41	274.519	177.154	198.276
Phlda1	-0.385832	0.176156	0.950049	36.1605	26.5994	32.5968	27.741	24.0598	24.1735	22.2738	26.7339
Gm27199	-0.385809	0.454216	0.983843	13.3928	5.31988	10.2169	18.092	16.8419	7.61632	9.32392	2.22782
Kcne2	-0.385612	0.754949	0.993901	34.8212	23.9395	22.3799	1.20613	8.42094	1.98687	49.2096	2.22782
Zfp930	-0.385481	0.0198592	0.866547	145.981	125.017	119.684	158.003	115.487	97.3564	96.8651	118.075
Ccdc88b	-0.385429	0.460367	0.983843	20.0891	7.97982	8.75734	7.23678	6.01496	7.61632	11.9139	6.68347
Unc93b1	-0.385336	0.140769	0.948172	54.9103	47.8789	36.4889	37.39	30.0748	34.7701	36.2597	26.7339
A230107N01Rik	-0.385215	0.382019	0.97921	17.4106	21.2795	11.1899	12.0613	8.42094	7.94746	14.5039	15.5948
Cmpk2	-0.385075	0.066289	0.88683	151.338	98.4178	104.602	79.6046	70.9765	83.7795	95.8292	77.9738
5430400D12Rik	-0.384701	0.394822	0.980194	5.35711	18.6196	22.3799	15.6797	12.0299	11.2589	15.0219	8.91129
Mir374b	-0.384694	0.371624	0.978328	10.7142	18.6196	21.4068	18.092	12.0299	10.9278	20.7198	6.68347
Gm26823	-0.384222	0.116819	0.921877	33.4819	55.8588	50.1114	51.8636	40.9017	35.4324	35.7417	33.4174
P4ha1	-0.384205	0.0372849	0.866547	237.052	271.314	230.123	174.889	239.395	162.592	158.507	131.442
Tanc2	-0.384107	0.0489044	0.871226	286.605	191.516	152.28	154.385	145.562	152.989	145.039	153.72
Zfp871	-0.383529	0.0141437	0.866547	289.284	337.813	345.428	372.694	264.658	283.791	189.586	305.212
BC005561	-0.38322	0.0128412	0.866547	154.017	140.977	143.523	182.126	134.735	119.543	108.779	115.847
Gm43848	-0.383122	0.373248	0.978328	14.732	21.2795	11.1899	26.5349	12.0299	10.2655	19.6838	11.1391
Sp100	-0.38303	0.243992	0.963218	26.7855	18.6196	28.2181	32.5655	16.8419	19.8687	27.9718	15.5948
Srrm4os	-0.382556	0.204794	0.955078	33.4819	61.1787	60.8149	51.8636	37.2927	57.9502	26.4178	33.4174
2810029C07Rik	-0.38246	0.266639	0.971476	24.107	18.6196	24.8125	19.2981	22.8568	14.5703	15.5399	17.8226
Gm20498	-0.382251	0.260167	0.969966	52.2318	34.5792	25.299	33.7717	22.8568	37.4193	29.0077	13.3669
Vdac3-ps1	-0.382169	0.379946	0.97921	50.8925	15.9596	29.1911	21.7104	8.42094	36.0947	16.0579	31.1895
Lcor	-0.382098	0.0446754	0.866547	112.499	117.037	115.305	143.53	108.269	95.7007	68.8934	111.391
Pcdhb14	-0.382013	0.0146671	0.866547	160.713	175.556	156.659	138.705	145.562	106.96	117.067	115.847
Gm43598	-0.381984	0.468714	0.983843	13.3928	7.97982	14.109	14.4736	7.21795	13.2458	13.9859	0
Pdlim5	-0.381771	0.0090325	0.844248	188.838	239.395	175.633	184.538	132.329	151.002	143.485	171.542
Gm45619	-0.381636	0.482981	0.986143	10.7142	5.31988	10.7034	7.23678	3.60898	7.28517	8.80592	6.68347
Adam21	-0.381382	0.45987	0.983843	13.3928	2.65994	10.7034	15.6797	12.0299	5.9606	6.73394	13.3669
Nfe2l2	-0.380753	0.0606286	0.874649	136.606	164.916	111.413	91.6659	115.487	86.0975	101.527	71.2904
5930420M18Rik	-0.380485	0.424385	0.983843	10.7142	15.9596	9.24386	9.64904	6.01496	9.27204	8.28793	8.91129
Edil3	-0.380398	0.0215218	0.866547	924.101	625.086	541.495	511.399	496.836	479.166	534.053	483.438
Sh3bgrl	-0.380363	0.049677	0.871226	460.711	305.893	252.99	247.257	291.124	207.627	249.156	222.782
Ppfibp1	-0.380251	0.0791518	0.896453	104.464	114.377	68.5992	68.7494	70.9765	63.5797	70.9654	55.6956
Lag3	-0.380077	0.347496	0.977646	34.8212	15.9596	21.4068	15.6797	25.2628	16.5572	18.6478	4.45565
Vav1	-0.380072	0.443246	0.983843	13.3928	29.2594	13.136	6.03065	18.0449	11.59	7.25194	6.68347
1700048O20Rik	-0.379562	0.216179	0.957959	52.2318	69.1585	65.1935	59.1004	84.2094	27.485	42.4756	37.873
Fam198a	-0.37954	0.390093	0.97921	25.4462	15.9596	13.136	15.6797	6.01496	15.5638	18.6478	8.91129
Amotl1	-0.379372	0.0581407	0.874101	199.552	135.657	106.548	115.789	108.269	107.291	103.599	104.708
Hhip	-0.379353	0.08414	0.896453	68.3031	66.4985	54.9766	60.3065	44.5107	52.6519	49.2096	35.6452
Rnaset2b	-0.379156	0.299307	0.976482	34.8212	15.9596	15.5686	25.3287	14.4359	17.8818	19.1658	17.8226
Gprin3	-0.378907	0.17342	0.949956	108.481	82.4582	80.2756	90.4598	104.66	75.832	34.1877	66.8347
Tbc1d2	-0.378051	0.463413	0.983843	13.3928	7.97982	13.136	7.23678	12.0299	6.95403	10.3599	2.22782
Timp3	-0.378046	0.0349188	0.866547	353.569	438.89	248.125	274.998	253.831	222.86	220.666	311.895
Hat1	-0.377381	0.0313029	0.866547	194.195	215.455	137.198	186.95	159.998	137.425	144.003	104.708
Cd59a	-0.377331	0.12378	0.933869	83.0351	74.4784	69.5722	66.3372	60.1496	47.6848	77.6993	31.1895
Wdr31	-0.377225	0.425276	0.983843	40.1783	21.2795	24.3259	6.03065	20.4509	8.94089	20.2018	24.5061
Sorcs1	-0.377218	0.0751655	0.896453	129.91	122.357	77.843	75.9862	78.1945	72.8517	73.5554	82.4295
Dtwd2	-0.376991	0.423971	0.983843	18.7499	21.2795	8.75734	7.23678	10.8269	10.2655	9.32392	8.91129
Galntl6	-0.376965	0.236778	0.96139	40.1783	39.8991	25.299	26.5349	36.0898	23.8424	21.2378	15.5948
Spata33	-0.376933	0.351664	0.978045	16.0713	31.9193	15.0821	16.8858	14.4359	15.5638	8.80592	22.2782
Usp18	-0.376749	0.456467	0.983843	21.4284	29.2594	8.75734	14.4736	8.42094	9.93433	24.8638	6.68347
Erbin	-0.376379	0.0215456	0.866547	831.691	542.628	474.356	524.667	428.265	433.468	445.994	525.766
Prrx1	-0.37588	0.0396206	0.866547	84.3744	93.0979	81.7352	98.9027	72.1795	65.8977	63.1954	77.9738
Gm17477	-0.375612	0.481896	0.986143	6.69638	26.5994	7.7843	7.23678	7.21795	8.60975	6.73394	11.1391
Lin9	-0.375454	0.0850293	0.896453	49.5532	85.1181	72.9778	62.7188	50.5257	46.6913	52.8355	60.1512
Lhfpl3	-0.37528	0.0495465	0.871226	223.659	186.196	129.901	170.064	125.111	135.438	163.169	106.936
Itih2	-0.374923	0.185735	0.952987	34.8212	26.5994	29.6777	38.5962	26.4658	23.5112	23.3098	31.1895
Fut9	-0.37487	0.000687266	0.597731	1376.78	1359.23	1251.81	1522.14	1201.79	1073.24	896.132	1084.95
Pfn4	-0.374567	0.269476	0.971476	36.1605	31.9193	18.9742	21.7104	21.6539	21.5244	20.7198	13.3669
Rhobtb1	-0.374456	0.460187	0.983843	14.732	7.97982	6.81126	10.8552	9.62394	7.61632	6.73394	6.68347
Ebf3	-0.373787	0.170437	0.949956	96.4279	58.5187	49.1384	45.833	37.2927	45.0356	59.5695	46.7843
Dpyd	-0.37372	0.210067	0.955078	49.5532	42.5591	29.6777	42.2146	19.2479	33.4456	39.3677	26.7339
Gm16485	-0.372376	0.23049	0.961301	68.3031	42.5591	25.299	42.2146	36.0898	28.8095	36.7777	33.4174
Atg5	-0.371823	0.0683063	0.894412	127.231	111.718	113.845	91.6659	80.6005	99.6744	97.3831	51.2399
D430036J16Rik	-0.371693	0.415486	0.983843	21.4284	5.31988	15.0821	30.1533	12.0299	20.8621	13.9859	6.68347
Tmeff1	-0.371599	0.144834	0.94857	295.98	148.957	136.712	125.438	168.419	122.855	154.363	95.7964
P2ry13	-0.371456	0.235712	0.961337	56.2496	39.8991	23.3529	42.2146	33.6838	26.1604	35.7417	24.5061
Snx16	-0.371313	0.007044	0.836865	192.856	188.856	186.337	183.332	153.983	129.146	156.953	142.581
C030005K06Rik	-0.371131	0.514539	0.987859	21.4284	2.65994	10.2169	10.8552	9.62394	14.5703	4.14396	6.68347
Cyp4f15	-0.370987	0.358229	0.978328	30.8034	13.2997	16.0551	14.4736	18.0449	10.2655	16.0579	15.5948
Bicc1	-0.370936	0.193806	0.952987	40.1783	39.8991	32.5968	26.5349	28.8718	29.803	23.8278	20.0504
Fstl5	-0.370691	0.0153366	0.866547	273.212	207.475	247.152	213.485	190.073	198.355	197.356	131.442
Gm37305	-0.370561	0.0991911	0.905368	50.8925	63.8386	53.5171	47.0391	43.3077	43.0487	37.2957	40.1008
Gm45053	-0.369603	0.483804	0.986143	9.37493	10.6398	7.7843	14.4736	12.0299	5.9606	4.66196	13.3669
Gm37602	-0.369547	0.099861	0.905368	46.8747	66.4985	51.0845	59.1004	46.9167	41.393	38.8497	44.5565
Etohd2	-0.369411	0.324732	0.976482	17.4106	18.6196	23.3529	15.6797	19.2479	13.2458	16.5759	8.91129
Hapln1	-0.368612	0.216257	0.957959	74.9995	34.5792	36.9754	36.1839	36.0898	27.8161	38.8497	42.3287
mt-Te	-0.368485	0.176435	0.950049	92.4101	37.2392	57.4092	49.4514	58.9466	36.4259	46.1016	49.0121
Sacs	-0.368289	0.00432311	0.822451	843.744	696.905	661.666	839.467	666.458	631.823	491.06	568.095
Abca8a	-0.367922	0.108038	0.916331	183.481	109.058	122.116	77.1924	103.457	80.468	99.4551	102.48
1810014B01Rik	-0.367883	0.322487	0.976482	29.4641	18.6196	24.3259	20.5042	26.4658	20.1998	17.6118	4.45565
Prima1	-0.3671	0.392702	0.97921	17.4106	10.6398	13.6225	13.2674	14.4359	8.94089	12.4319	6.68347
Folh1	-0.367093	0.175119	0.949956	148.66	202.156	110.44	65.1311	121.502	81.7926	115.513	77.9738
Clec11a	-0.366971	0.444263	0.983843	12.0535	21.2795	11.6765	8.44291	12.0299	6.29174	13.4679	6.68347
2310043M15Rik	-0.366872	0.391457	0.97921	14.732	15.9596	12.6495	20.5042	7.21795	9.60318	13.4679	22.2782
Ctso	-0.366586	0.0633056	0.882522	275.891	281.954	152.767	185.744	172.028	162.592	197.356	144.809
Gm10644	-0.365916	0.356612	0.978328	14.732	15.9596	16.5416	13.2674	13.2329	11.59	10.3599	13.3669
Wdr35	-0.365858	0.0503747	0.871226	285.266	196.836	189.742	172.477	198.494	173.851	155.917	118.075
Tgfbr1	-0.365468	0.0256159	0.866547	170.088	143.637	143.037	121.819	121.502	103.317	123.801	95.7964
Hs6st2	-0.365275	0.0396966	0.866547	277.23	159.596	169.309	178.507	149.171	148.684	165.241	144.809
Ptprh	-0.364962	0.450976	0.983843	10.7142	7.97982	9.24386	13.2674	10.8269	7.28517	6.73394	8.91129
Vgf	-0.364841	0.328058	0.976482	116.517	55.8588	29.1911	36.1839	28.8718	50.9962	51.7995	49.0121
Gm13341	-0.364764	0.172179	0.949956	85.7137	37.2392	72.4913	67.5433	50.5257	49.3405	71.4834	31.1895
Eif2ak2	-0.364411	0.0733141	0.896453	85.7137	82.4582	70.5452	68.7494	54.1346	55.3011	70.4474	51.2399
Gm340	-0.36433	0.408358	0.983843	12.0535	15.9596	13.6225	13.2674	7.21795	14.2392	8.28793	11.1391
Arsk	-0.364272	0.0638023	0.882522	92.4101	132.997	90.006	119.407	99.8483	76.1632	69.9294	91.3408
A230004M16Rik	-0.364155	0.434207	0.983843	8.03566	7.97982	12.6495	24.1226	13.2329	10.2655	8.80592	11.1391
Gm28439	-0.363989	0.717608	0.992384	724.548	103.738	283.64	53.0697	74.5855	202.991	60.0875	570.323
Pcdha7	-0.363891	0.415161	0.983843	18.7499	18.6196	17.5147	8.44291	10.8269	7.61632	12.9499	22.2782
B630019K06Rik	-0.363758	0.196112	0.952987	115.178	69.1585	48.1654	57.8943	40.9017	52.3208	69.9294	57.9234
Lamc3	-0.363709	0.463009	0.983843	2.67855	18.6196	16.5416	15.6797	10.8269	12.5835	8.28793	8.91129
Nlrc3	-0.362919	0.384194	0.97921	12.0535	13.2997	13.136	19.2981	8.42094	11.9212	12.4319	11.1391
Gm28437	-0.362548	0.722768	0.992433	1071.42	119.697	444.678	77.1924	96.2394	398.367	87.0232	753.004
Pet100	-0.362506	0.155446	0.949956	48.2139	47.8789	43.7867	38.5962	39.6987	26.8227	37.2957	37.873
S100a1	-0.362436	0.059627	0.874101	291.962	191.516	193.635	168.858	147.968	165.241	205.126	129.214
4930539J05Rik	-0.362303	0.521069	0.987859	4.01783	7.97982	16.5416	15.6797	18.0449	7.61632	5.17995	6.68347
Rps6-ps4	-0.362009	0.394485	0.980194	89.7315	21.2795	48.1654	18.092	21.6539	48.6782	25.8998	44.5565
Ifit3	-0.361933	0.372125	0.978328	243.748	156.937	113.845	102.521	80.6005	98.681	194.248	102.48
Hddc2	-0.361793	0.327745	0.976482	52.2318	37.2392	19.4608	20.5042	31.2778	25.167	24.3458	13.3669
Gm36936	-0.361665	0.194777	0.952987	49.5532	55.8588	40.8676	51.8636	54.1346	32.121	25.8998	46.7843
Wipf1	-0.361634	0.0871598	0.896453	104.464	101.078	71.5183	65.1311	58.9466	61.924	63.7134	80.2017
Tmem173	-0.361401	0.439894	0.983843	12.0535	15.9596	9.73038	16.8858	18.0449	8.60975	9.32392	4.45565
Enpp1	-0.360425	0.0651926	0.88661	77.678	79.7982	70.0587	90.4598	67.3675	59.9371	54.3895	69.0625
NA	-0.360322	0.19567	0.952987	85.7137	42.5591	57.8957	59.1004	64.9616	50.6651	50.7636	20.0504
Mastl	-0.359905	0.432824	0.983843	9.37493	13.2997	12.163	13.2674	12.0299	8.27861	6.73394	13.3669
Cpq	-0.359707	0.0907709	0.898059	108.481	98.4178	89.5195	75.9862	58.9466	77.1566	89.6132	51.2399
Slc27a2	-0.359633	0.461863	0.983843	38.839	15.9596	10.2169	9.64904	12.0299	9.93433	19.6838	15.5948
Sub1	-0.359624	0.0194132	0.866547	937.493	582.527	609.608	723.678	609.917	553.342	603.465	450.02
D930015M05Rik	-0.35961	0.456157	0.983843	5.35711	29.2594	9.73038	20.5042	10.8269	13.2458	9.32392	13.3669
Rida	-0.359592	0.0270527	0.866547	455.354	728.824	482.627	430.589	422.25	402.34	454.8	327.49
Zfp72	-0.358914	0.285185	0.976079	34.8212	26.5994	28.7046	25.3287	36.0898	18.8752	15.5399	24.5061
Mthfd2l	-0.358781	0.25151	0.96774	81.6959	55.8588	35.0294	39.8023	55.3376	36.4259	44.5476	22.2782
6530409C15Rik	-0.358764	0.399423	0.982178	14.732	15.9596	12.163	18.092	16.8419	12.9146	7.76993	8.91129
Plxdc2	-0.358655	0.019418	0.866547	233.034	196.836	194.608	183.332	184.058	163.254	128.463	158.175
Zfp937	-0.358629	0.259526	0.969966	62.946	18.6196	39.408	41.0084	44.5107	27.8161	35.7417	20.0504
Unc5d	-0.358598	0.293094	0.976482	115.178	53.1988	40.3811	34.9778	58.9466	51.3274	34.1877	44.5565
Gcnt2	-0.358425	0.351138	0.978045	28.1248	23.9395	12.6495	16.8858	14.4359	14.9015	16.5759	13.3669
Shroom3	-0.358235	0.366045	0.978328	17.4106	23.9395	17.5147	18.092	12.0299	21.1932	10.8779	11.1391
Gm5499	-0.358218	0.491768	0.986143	42.8568	7.97982	21.4068	6.03065	8.42094	16.5572	13.4679	26.7339
Gm2223	-0.358056	0.521053	0.987859	21.4284	2.65994	15.5686	6.03065	10.8269	12.2523	4.66196	11.1391
Dnajc28	-0.35785	0.0846234	0.896453	72.3209	55.8588	72.4913	63.9249	52.9316	46.3602	58.0155	55.6956
Slc13a4	-0.357744	0.176266	0.950049	72.3209	50.5389	47.1923	36.1839	33.6838	34.7701	47.6556	44.5565
Nrp2	-0.357432	0.164813	0.949956	83.0351	61.1787	45.7328	44.6268	39.6987	40.0685	52.8355	46.7843
Fbxl22	-0.357363	0.285192	0.976079	18.7499	29.2594	26.7585	37.39	31.2778	21.5244	16.0579	20.0504
Kcnb1	-0.357313	0.0207565	0.866547	261.159	236.735	246.665	197.805	193.682	205.641	145.039	196.048
Gm42984	-0.357147	0.502369	0.98668	6.69638	7.97982	10.2169	14.4736	8.42094	10.5966	7.25194	2.22782
Efcab2	-0.356895	0.0175216	0.866547	223.659	199.496	163.47	186.95	166.013	135.107	152.291	147.036
Magohb	-0.356735	0.21554	0.957959	29.4641	29.2594	28.2181	34.9778	22.8568	23.8424	25.8998	20.0504
Etnppl	-0.35669	0.21087	0.955078	966.957	1407.11	685.019	639.249	671.269	635.466	888.88	681.714
Smarca1	-0.356617	0.09665	0.905133	216.963	170.236	110.926	135.087	127.517	127.822	93.7572	144.809
Susd5	-0.35641	0.429035	0.983843	16.0713	10.6398	9.73038	14.4736	10.8269	7.28517	11.3959	11.1391
Kpna2	-0.356217	0.0912694	0.89827	128.571	95.7579	74.4374	119.407	73.3825	89.4089	86.5052	66.8347
Gm37310	-0.35618	0.35149	0.978045	10.7142	26.5994	19.4608	25.3287	15.6389	19.2064	13.9859	11.1391
Gm16835	-0.356142	0.281155	0.975338	25.4462	13.2997	27.7316	31.3594	21.6539	17.8818	18.1298	26.7339
Epha10	-0.35585	0.370912	0.978328	105.803	26.5994	28.2181	27.741	33.6838	34.439	34.7057	46.7843
Tmsb10	-0.355771	0.113252	0.917415	345.533	260.674	166.876	153.179	196.088	158.287	165.241	202.732
Ccdc80	-0.355754	0.39006	0.97921	20.0891	23.9395	13.6225	16.8858	10.8269	19.2064	13.9859	6.68347
Aspa	-0.355516	0.0615065	0.876606	210.266	146.297	131.847	138.705	102.254	115.9	149.183	115.847
Mir22hg	-0.355178	0.160643	0.949956	65.6245	45.219	43.3002	78.3985	37.2927	46.6913	42.9936	57.9234
Cldn2	-0.355173	0.603247	0.990624	13.3928	21.2795	8.75734	2.41226	6.01496	6.29174	18.1298	0
Msto1	-0.355153	0.0888251	0.896453	79.0173	82.4582	60.3283	71.1617	44.5107	57.9502	55.9435	66.8347
Fgf2	-0.355048	0.197179	0.952987	46.8747	74.4784	48.1654	53.0697	64.9616	38.4127	29.5257	40.1008
Zfp994	-0.354609	0.10842	0.916331	81.6959	58.5187	55.9497	66.3372	60.1496	43.711	52.3175	51.2399
Lrrc3	-0.354492	0.501792	0.98668	12.0535	21.2795	9.73038	4.82452	6.01496	6.29174	12.9499	8.91129
Zbtb26	-0.354438	0.0268757	0.866547	116.517	130.337	129.414	123.025	114.284	91.0647	99.4551	84.6573
Aldh3b1	-0.354413	0.35747	0.978328	28.1248	10.6398	21.8933	26.5349	9.62394	22.1867	21.2378	13.3669
Lca5l	-0.35436	0.346065	0.976482	20.0891	18.6196	16.0551	21.7104	13.2329	10.9278	18.6478	17.8226
2610203C20Rik	-0.354324	0.0228597	0.866547	395.086	258.014	277.316	287.059	251.425	200.673	243.976	269.567
Myof	-0.354006	0.441831	0.983843	13.3928	39.8991	14.5956	9.64904	8.42094	14.5703	18.6478	11.1391
D330023K18Rik	-0.353736	0.328825	0.976482	29.4641	18.6196	20.9203	14.4736	16.8419	14.5703	19.6838	13.3669
Kansl1l	-0.353647	0.0354586	0.866547	180.802	159.596	148.388	220.722	164.81	137.094	121.729	133.669
Eif1a	-0.353599	0.0528587	0.874101	334.819	212.795	192.175	190.569	163.607	193.057	185.96	180.454
Arhgef4	-0.353521	0.0540901	0.874101	305.355	199.496	203.365	171.271	153.983	185.772	194.248	144.809
Coa6	-0.353478	0.241294	0.963218	91.0708	45.219	45.2463	31.3594	44.5107	39.4062	46.6196	33.4174
Hoga1	-0.353474	0.422606	0.983843	13.3928	7.97982	13.136	14.4736	9.62394	11.59	8.80592	8.91129
Tmlhe	-0.353339	0.151652	0.949538	60.2674	53.1988	43.7867	47.0391	51.7287	35.4324	39.8856	28.9617
Mcph1	-0.35323	0.202681	0.954787	33.4819	31.9193	36.0024	28.9471	30.0748	24.1735	25.3818	24.5061
Cep57l1	-0.352836	0.242164	0.963218	24.107	42.5591	29.1911	39.8023	27.6688	29.1407	25.8998	15.5948
2610507I01Rik	-0.352471	0.124375	0.933869	57.5889	55.8588	60.8149	54.2759	38.4957	44.0422	55.9435	35.6452
Lpar6	-0.352263	0.356559	0.978328	26.7855	29.2594	17.5147	34.9778	22.8568	15.8949	31.0797	8.91129
Kif5a	-0.352221	0.276583	0.975338	6700.4	2612.06	3685.38	3407.32	3527.17	3305.81	3274.77	2744.68
Trim12c	-0.351942	0.203496	0.954787	61.6067	50.5389	34.0563	39.8023	40.9017	30.4653	41.4396	26.7339
Lrrc40	-0.351928	0.0192311	0.866547	176.784	210.135	159.092	209.867	162.404	149.015	136.233	133.669
Alkbh2	-0.351721	0.42251	0.983843	12.0535	23.9395	16.5416	10.8552	10.8269	16.5572	10.3599	6.68347
A930017M01Rik	-0.35141	0.298317	0.976482	66.9638	45.219	32.1102	22.9165	44.5107	31.7898	22.7918	31.1895
Palmd	-0.351184	0.457335	0.983843	20.0891	26.5994	12.6495	7.23678	8.42094	12.2523	18.1298	6.68347
Gabrb1	-0.351046	0.00569041	0.822451	624.103	555.928	465.112	530.697	495.633	417.904	411.288	367.591
Kcnj6	-0.350647	0.218236	0.957959	40.1783	95.7579	79.3026	63.9249	64.9616	51.9896	33.6697	73.5182
Rpl31-ps8	-0.350529	0.56618	0.988036	37.4997	2.65994	11.6765	8.44291	7.21795	12.5835	5.69795	26.7339
Gm20721	-0.350448	0.300198	0.976482	41.5176	26.5994	19.4608	24.1226	21.6539	20.8621	17.6118	28.9617
Acer3	-0.350211	0.0170445	0.866547	166.07	196.836	196.554	148.354	143.156	136.763	142.967	129.214
Pisd-ps2	-0.349765	0.384491	0.97921	22.7677	10.6398	13.136	20.5042	14.4359	15.5638	10.8779	11.1391
Slc16a7	-0.349094	0.0521755	0.874101	151.338	191.516	193.148	240.02	194.885	133.451	130.535	160.403
1810041L15Rik	-0.349088	0.25333	0.969274	65.6245	39.8991	33.0833	26.5349	31.2778	26.8227	35.7417	35.6452
Calr3	-0.34906	0.475899	0.985484	16.0713	21.2795	10.2169	9.64904	6.01496	7.94746	17.6118	8.91129
Prps2	-0.349041	0.0929083	0.900842	140.624	82.4582	114.818	85.6353	87.8184	84.7729	96.8651	60.1512
Zfp595	-0.348923	0.242452	0.963218	42.8568	29.2594	41.8406	39.8023	46.9167	25.4981	33.1517	15.5948
Nucb2	-0.348574	0.145615	0.94857	54.9103	39.8991	44.2732	44.6268	39.6987	37.7504	34.7057	31.1895
Kif19a	-0.348109	0.327626	0.976482	21.4284	23.9395	20.9203	24.1226	10.8269	21.8555	19.6838	13.3669
Rnase4	-0.347892	0.147505	0.94857	69.6424	103.738	57.8957	45.833	55.3376	52.3208	51.7995	46.7843
Aqp4	-0.347729	0.0003033	0.597731	2256.68	2380.65	2474.43	2432.77	2046.29	2056.74	1692.81	1695.37
Ccdc142	-0.347474	0.531524	0.987859	6.69638	2.65994	15.0821	10.8552	4.81197	7.28517	9.84191	8.91129
Gm12592	-0.347409	0.373598	0.978328	9.37493	31.9193	18.9742	19.2981	12.0299	16.5572	13.4679	17.8226
Ebf2	-0.347129	0.285142	0.976079	32.1426	15.9596	35.0294	49.4514	20.4509	32.121	31.0797	20.0504
Gm27028	-0.347106	0.35995	0.978328	20.0891	18.6196	13.6225	20.5042	18.0449	12.9146	13.4679	11.1391
Gm3365	-0.346873	0.225189	0.961292	34.8212	34.5792	44.2732	39.8023	33.6838	34.7701	33.6697	13.3669
Pex11a	-0.346801	0.22934	0.961301	34.8212	26.5994	37.9485	28.9471	30.0748	26.8227	20.7198	28.9617
Matk	-0.346714	0.123972	0.933869	124.553	90.438	68.1126	72.3678	58.9466	69.2091	78.7353	64.6069
9530077C05Rik	-0.346352	0.146632	0.94857	46.8747	77.1383	50.598	43.4207	40.9017	43.711	41.4396	35.6452
Gm10031	-0.34623	0.51557	0.987859	22.7677	7.97982	8.75734	4.82452	9.62394	8.60975	6.73394	11.1391
Grk4	-0.345426	0.234086	0.961337	29.4641	31.9193	29.6777	37.39	21.6539	21.1932	27.9718	33.4174
2310022B05Rik	-0.345379	0.131796	0.938381	341.515	175.556	151.794	183.332	135.938	179.149	197.356	151.492
Slc38a6	-0.345344	0.0440309	0.866547	104.464	109.058	98.7633	120.613	93.8334	86.7598	74.0733	86.8851
Tmem252	-0.344826	0.412527	0.983843	10.7142	29.2594	11.6765	19.2981	12.0299	10.5966	14.5039	15.5948
Rplp1	-0.344499	0.227478	0.961301	1723.65	915.02	884.978	891.331	876.981	863.955	1078.47	652.752
Tgfbr2	-0.344364	0.196808	0.952987	62.946	58.5187	46.7058	32.5655	39.6987	41.0619	43.5116	24.5061
Pou3f2	-0.34431	0.217166	0.957959	129.91	74.4784	58.8688	66.3372	44.5107	53.9765	73.0374	91.3408
Zfp984	-0.344168	0.362932	0.978328	25.4462	10.6398	15.0821	25.3287	13.2329	13.9081	17.0938	17.8226
Cxadr	-0.344097	0.0366657	0.866547	143.303	162.256	131.847	171.271	108.269	127.159	102.563	142.581
Lipa	-0.343985	0.166897	0.949956	95.0886	111.718	83.1947	51.8636	62.5556	52.9831	88.0592	57.9234
Usp9x	-0.343786	0.00562358	0.822451	1483.92	1130.48	1249.87	1272.47	1127.2	1117.28	825.685	984.698
Chd3	-0.343727	0.246479	0.963959	1253.56	542.628	606.689	629.6	556.985	698.052	566.169	568.095
mt-Nd4l	-0.34358	0.286254	0.976079	171.427	55.8588	79.7891	57.8943	57.7436	65.5666	60.0875	113.619
H2-Q7	-0.343482	0.460048	0.983843	13.3928	21.2795	8.75734	9.64904	9.62394	7.61632	10.8779	11.1391
Sema3g	-0.343369	0.515268	0.987859	8.03566	10.6398	10.7034	7.23678	6.01496	9.60318	6.73394	4.45565
Cep162	-0.343129	0.0586233	0.874101	154.017	111.718	131.36	106.139	125.111	96.0318	96.3472	80.2017
Rhbdd2	-0.343099	0.0527881	0.874101	171.427	132.997	111.413	121.819	111.878	102.324	111.369	89.1129
Gm40466	-0.34293	0.42798	0.983843	18.7499	10.6398	15.5686	9.64904	10.8269	13.2458	9.84191	8.91129
D830044I16Rik	-0.342688	0.464222	0.983843	13.3928	15.9596	7.7843	12.0613	10.8269	8.27861	9.84191	6.68347
A830019P07Rik	-0.342244	0.438181	0.983843	12.0535	18.6196	15.5686	7.23678	10.8269	9.27204	10.8779	11.1391
Rif1	-0.341761	0.00996452	0.844248	913.386	1239.53	1158.89	1396.7	972.017	952.371	793.051	1004.75
Cd24a	-0.341701	0.259107	0.969966	91.0708	125.017	66.1666	41.0084	46.9167	47.6848	87.5412	64.6069
Gprasp2	-0.341629	0.100719	0.906692	1178.56	563.908	534.198	583.767	556.985	614.273	540.787	543.589
Asah2	-0.341582	0.205373	0.955078	184.82	66.4985	78.8161	86.8414	81.8035	75.1697	94.7932	77.9738
Ptgfrn	-0.341537	0.31174	0.976482	83.0351	39.8991	35.0294	30.1533	52.9316	29.1407	38.3317	26.7339
Snhg8	-0.341476	0.121939	0.931031	84.3744	58.5187	63.2475	85.6353	66.1646	49.0093	67.3394	46.7843
Gm20559	-0.341119	0.443421	0.983843	17.4106	15.9596	11.1899	9.64904	6.01496	11.59	10.3599	13.3669
Casc1	-0.340346	0.425774	0.983843	20.0891	15.9596	13.136	12.0613	10.8269	7.94746	13.9859	17.8226
Napsa	-0.340267	0.405892	0.983843	18.7499	23.9395	12.6495	12.0613	13.2329	11.2589	15.0219	8.91129
Pcdh17	-0.340078	0.124239	0.933869	202.231	122.357	106.548	101.315	99.8483	110.271	117.067	84.6573
Rtl5	-0.339785	0.255916	0.969966	127.231	37.2392	50.598	61.5127	51.7287	58.2814	55.9435	53.4678
Fndc3b	-0.339749	0.177622	0.950531	48.2139	58.5187	39.408	42.2146	36.0898	29.803	40.4036	40.1008
Xrcc5	-0.339734	0.0674313	0.893686	124.553	130.337	108.98	112.17	85.4124	99.0121	110.851	62.3791
Prex2	-0.339712	0.0181458	0.866547	771.423	1095.9	855.3	995.058	830.064	751.697	562.543	793.105
Lrrn3	-0.339666	0.00638216	0.827554	392.408	359.092	296.777	382.343	292.327	271.869	280.754	278.478
Gm26833	-0.33933	0.521988	0.987859	8.03566	5.31988	10.2169	13.2674	8.42094	10.2655	5.69795	4.45565
Gm26721	-0.339043	0.462702	0.983843	12.0535	7.97982	9.73038	16.8858	7.21795	8.94089	9.32392	13.3669
Birc3	-0.338992	0.402561	0.983843	12.0535	15.9596	19.4608	13.2674	14.4359	13.2458	10.3599	11.1391
Pkd2l1	-0.338985	0.309861	0.976482	22.7677	15.9596	40.3811	31.3594	18.0449	22.5178	26.4178	26.7339
Pcp4l1	-0.338579	0.202271	0.954787	254.462	196.836	119.684	97.6966	109.472	121.199	177.672	109.163
Gm14322	-0.338443	0.135922	0.944839	76.3387	61.1787	60.8149	86.8414	73.3825	46.029	60.0875	46.7843
Gm47135	-0.338315	0.451273	0.983843	17.4106	15.9596	8.27082	13.2674	10.8269	10.2655	8.28793	13.3669
Ddhd1	-0.338192	0.00761619	0.836865	444.64	393.671	332.779	383.55	319.996	296.374	277.128	340.857
Slc25a13	-0.338163	0.282113	0.975338	40.1783	29.2594	22.3799	24.1226	21.6539	23.8424	22.2738	20.0504
Gm17018	-0.338049	0.185244	0.952987	206.249	93.0979	94.3847	90.4598	102.254	83.4483	111.369	84.6573
Gm15631	-0.33799	0.359632	0.978328	44.1961	13.2997	19.9473	22.9165	15.6389	22.5178	22.2738	17.8226
Arpc1b	-0.337753	0.261422	0.969966	65.6245	90.438	45.7328	26.5349	38.4957	40.0685	49.2096	44.5565
Fcer1g	-0.337676	0.301268	0.976482	36.1605	39.8991	26.7585	18.092	21.6539	18.8752	29.0077	22.2782
Mpp5	-0.337482	0.0371871	0.866547	578.567	372.392	360.51	359.427	329.62	294.056	332.553	374.274
Syn3	-0.337383	0.27982	0.975338	34.8212	23.9395	24.8125	38.5962	18.0449	29.1407	20.7198	28.9617
Myom1	-0.33659	0.537674	0.987859	5.35711	13.2997	10.2169	8.44291	2.40598	7.61632	9.32392	8.91129
Taf6l	-0.336453	0.172339	0.949956	74.9995	39.8991	50.598	51.8636	42.1047	50.6651	42.4756	33.4174
Ism1	-0.336405	0.410692	0.983843	21.4284	13.2997	16.5416	10.8552	9.62394	12.5835	15.0219	11.1391
Zfp719	-0.336022	0.0402149	0.866547	121.874	170.236	143.523	160.415	98.6453	126.166	126.909	106.936
Slc7a3	-0.335566	0.138537	0.946337	89.7315	47.8789	56.9227	69.9556	55.3376	49.0093	49.7276	62.3791
Ccdc66	-0.335456	0.0413932	0.866547	129.91	146.297	130.874	138.705	137.141	101.33	99.9731	91.3408
Tpmt	-0.335393	0.187329	0.952987	42.8568	31.9193	40.8676	38.5962	27.6688	31.1276	32.6337	33.4174
Mobp	-0.335123	0.273805	0.974496	7537.45	5165.61	4124.71	3623.22	4350.02	3560.13	5336.91	2958.55
Gm9816	-0.335071	0.556232	0.987859	18.7499	7.97982	11.1899	4.82452	4.81197	14.2392	5.17995	8.91129
Pdgfc	-0.334529	0.52097	0.987859	17.4106	10.6398	8.27082	7.23678	8.42094	6.62288	12.4319	4.45565
Gm13293	-0.33446	0.410672	0.983843	10.7142	23.9395	14.5956	14.4736	9.62394	12.9146	11.9139	13.3669
Hspb11	-0.334143	0.312574	0.976482	24.107	31.9193	28.2181	25.3287	21.6539	17.5506	30.0437	13.3669
Gm9794	-0.333993	0.448797	0.983843	33.4819	15.9596	18.4877	8.44291	12.0299	15.2326	10.8779	26.7339
Depdc7	-0.333898	0.474374	0.985484	13.3928	13.2997	8.27082	12.0613	8.42094	9.27204	9.84191	6.68347
Nmrk1	-0.333503	0.13205	0.938381	49.5532	61.1787	56.9227	77.1924	55.3376	47.3536	47.6556	42.3287
Syk	-0.333501	0.501036	0.98668	10.7142	15.9596	14.5956	6.03065	12.0299	6.95403	6.73394	15.5948
Zswim6	-0.333489	0.125296	0.933869	84.3744	85.1181	70.5452	78.3985	40.9017	66.2288	76.1453	60.1512
D3Ertd751e	-0.333238	0.0323922	0.866547	162.052	180.876	142.55	137.499	139.547	121.199	108.261	120.302
Plcd1	-0.333137	0.287705	0.976079	34.8212	39.8991	29.6777	19.2981	27.6688	20.1998	21.2378	31.1895
Zfp991	-0.33306	0.429815	0.983843	20.0891	5.31988	14.5956	16.8858	14.4359	11.59	11.9139	8.91129
Swap70	-0.332957	0.311913	0.976482	18.7499	21.2795	34.0563	33.7717	20.4509	23.5112	25.8998	15.5948
Gm37457	-0.332736	0.440856	0.983843	6.69638	18.6196	23.3529	19.2981	13.2329	17.5506	12.9499	8.91129
Zfp125	-0.332483	0.335034	0.976482	25.4462	15.9596	18.4877	25.3287	16.8419	18.2129	17.6118	13.3669
2900018N21Rik	-0.332246	0.459047	0.983843	18.7499	26.5994	9.24386	12.0613	10.8269	9.27204	11.9139	20.0504
Sema3b	-0.332134	0.484281	0.986143	18.7499	13.2997	13.136	7.23678	8.42094	7.61632	15.5399	8.91129
Gm13340	-0.331796	0.365044	0.978328	440.622	132.997	313.318	190.569	210.524	226.834	213.414	209.415
Fat3	-0.331773	0.0495859	0.871226	220.981	188.856	167.849	162.828	152.78	163.254	112.923	160.403
Gm14410	-0.331664	0.0858034	0.896453	113.838	66.4985	83.1947	108.552	76.9915	77.4877	73.5554	69.0625
Rdh10	-0.331596	0.0664166	0.88683	81.6959	114.377	113.359	131.468	96.2394	87.7532	82.8793	84.6573
Zfp729b	-0.33152	0.062759	0.882522	113.838	87.7781	103.629	98.9027	97.4423	82.4549	76.6633	64.6069
Lactb2	-0.331374	0.0153627	0.866547	178.124	220.775	174.174	191.775	139.547	151.995	150.219	155.948
Dkk3	-0.331151	0.202912	0.954787	154.017	170.236	88.0599	63.9249	108.269	79.1435	95.3112	86.8851
Rbm41	-0.33044	0.106221	0.916331	87.053	93.0979	115.791	130.262	97.4423	84.4418	64.7494	106.936
Lrrc4c	-0.329769	0.0597734	0.874101	211.606	154.277	125.035	165.24	119.096	131.133	130.017	138.125
Zwint	-0.32953	0.275562	0.975338	4599.07	2481.73	1994.24	2087.81	2101.63	2248.8	2597.23	1931.52
Echdc1	-0.329366	0.135268	0.943101	101.785	87.7781	65.1935	59.1004	68.5705	62.5863	60.6055	49.0121
Cenpn	-0.329291	0.458546	0.983843	12.0535	13.2997	14.109	9.64904	12.0299	8.94089	10.8779	6.68347
Spats2l	-0.329168	0.336327	0.976482	61.6067	31.9193	29.1911	34.9778	15.6389	28.4784	44.0296	35.6452
Tnfrsf19	-0.329162	0.105648	0.916331	117.856	95.7579	113.359	78.3985	64.9616	90.0712	94.2752	66.8347
Ap3m1	-0.328936	0.0248662	0.866547	317.408	295.253	228.664	282.235	241.801	221.867	236.724	173.77
Akap11	-0.32886	0.000797183	0.597731	1828.11	1614.58	1506.26	1610.18	1377.43	1348.42	1152.54	1347.83
Znf41-ps	-0.328657	0.526352	0.987859	6.69638	7.97982	13.6225	8.44291	6.01496	7.94746	9.32392	6.68347
4921504A21Rik	-0.328637	0.313237	0.976482	28.1248	31.9193	25.7855	16.8858	19.2479	19.8687	22.7918	15.5948
1810021B22Rik	-0.328626	0.526989	0.987859	8.03566	10.6398	9.24386	10.8552	3.60898	9.93433	8.28793	6.68347
Prss23	-0.328507	0.360935	0.978328	17.4106	31.9193	23.8394	14.4736	21.6539	14.9015	17.6118	13.3669
Phip	-0.32831	0.00461239	0.822451	933.476	1085.26	985.687	1197.69	905.853	853.359	707.582	886.674
Kcnn3	-0.328176	0.220301	0.957959	80.3566	39.8991	46.7058	50.6575	54.1346	49.3405	35.2237	33.4174
Cabp4	-0.327856	0.523267	0.987859	9.37493	13.2997	7.7843	9.64904	3.60898	6.95403	9.32392	11.1391
Tmem132b	-0.327829	0.195816	0.952987	131.249	87.7781	70.0587	51.8636	72.1795	62.2551	72.5194	60.1512
Cd200	-0.326973	0.158626	0.949956	304.016	159.596	131.36	139.911	153.983	136.1	151.255	142.581
Pdp1	-0.326843	0.00249427	0.747015	344.194	383.032	339.59	350.984	273.079	292.069	266.768	291.845
Gm15893	-0.326685	0.399146	0.982178	22.7677	31.9193	33.5698	26.5349	38.4957	28.4784	11.9139	11.1391
Cpe	-0.326621	0.274136	0.974561	8426.73	4040.45	3856.15	3666.64	3919.35	4071.42	4169.86	3778.39
Bcl11a	-0.326358	0.210836	0.955078	40.1783	37.2392	39.408	44.6268	24.0598	36.0947	35.7417	28.9617
Itga1	-0.326317	0.359098	0.978328	16.0713	39.8991	24.8125	20.5042	15.6389	24.8358	16.5759	17.8226
Prrt4	-0.325961	0.593361	0.990069	18.7499	7.97982	5.83823	8.44291	1.20299	9.60318	12.4319	6.68347
Zfp442	-0.325901	0.352083	0.978045	48.2139	39.8991	34.5428	26.5349	45.7137	29.1407	13.9859	33.4174
Bach2	-0.325842	0.267803	0.971476	45.5354	90.438	58.8688	48.2452	78.1945	38.0816	39.8856	33.4174
Ptar1	-0.325791	0.168727	0.949956	57.5889	93.0979	100.709	77.1924	69.7735	76.8255	46.1016	73.5182
Mis18a	-0.325674	0.330424	0.976482	24.107	21.2795	20.9203	19.2981	18.0449	15.5638	17.6118	17.8226
Zfp938	-0.325567	0.0332679	0.866547	212.945	175.556	163.957	176.095	168.419	128.484	151.255	131.442
Plscr4	-0.325517	0.145964	0.94857	56.2496	66.4985	47.1923	65.1311	42.1047	43.3799	47.6556	51.2399
Clcn5	-0.325489	0.0390339	0.866547	160.713	154.277	149.848	179.713	128.72	126.828	109.297	162.631
Zfp942	-0.325234	0.10717	0.916331	184.82	119.697	115.791	149.56	138.344	121.53	112.405	73.5182
Epb41l2	-0.325085	0.0542839	0.874101	282.587	292.594	205.311	174.889	209.321	176.5	186.996	178.226
Rfesd	-0.32474	0.187242	0.952987	62.946	34.5792	50.1114	62.7188	55.3376	42.0553	40.9216	31.1895
Hint3	-0.324599	0.129811	0.938381	79.0173	42.5591	77.843	88.0475	56.5406	64.242	54.9075	62.3791
2210408F21Rik	-0.323915	0.391646	0.97921	22.7677	29.2594	18.4877	12.0613	21.6539	12.5835	15.0219	15.5948
Actr6	-0.323831	0.0596254	0.874101	136.606	101.078	110.926	123.025	97.4423	81.4615	105.153	98.0242
A330015K06Rik	-0.323802	0.425464	0.983843	36.1605	10.6398	18.4877	22.9165	24.0598	11.2589	23.3098	13.3669
Traf3	-0.323559	0.108333	0.916331	194.195	132.997	140.604	101.315	129.923	122.855	110.851	84.6573
Zfp97	-0.323317	0.436436	0.983843	17.4106	26.5994	16.5416	9.64904	12.0299	11.9212	18.1298	8.91129
Lcorl	-0.322992	0.0833963	0.896453	158.035	186.196	122.116	131.468	116.69	104.973	101.527	158.175
Gm3257	-0.322828	0.321659	0.976482	25.4462	34.5792	36.4889	49.4514	32.4808	40.7307	20.2018	20.0504
Fam228b	-0.32264	0.315981	0.976482	37.4997	29.2594	24.8125	50.6575	25.2628	21.8555	27.9718	44.5565
Wnt5a	-0.322316	0.383523	0.97921	34.8212	42.5591	24.8125	16.8858	38.4957	17.5506	21.7558	13.3669
Rpl39	-0.322254	0.095983	0.903808	409.819	289.934	305.047	254.494	281.5	239.748	315.459	158.175
Zfp455	-0.321669	0.403193	0.983843	20.0891	15.9596	42.8137	16.8858	22.8568	19.5375	17.6118	24.5061
Mir186	-0.321595	0.263191	0.97132	40.1783	39.8991	30.1642	54.2759	28.8718	30.7964	27.4538	49.0121
Mpc1-ps	-0.321528	0.133899	0.942812	87.053	58.5187	66.1666	66.3372	43.3077	57.288	64.2314	55.6956
Zfp979	-0.321183	0.34336	0.976482	17.4106	26.5994	22.3799	36.1839	25.2628	17.5506	17.6118	24.5061
Elf1	-0.321082	0.215251	0.957959	57.5889	77.1383	37.462	49.4514	36.0898	41.7242	40.4036	53.4678
Thnsl1	-0.321075	0.137912	0.946337	101.785	79.7982	72.4913	71.1617	73.3825	74.5075	60.0875	42.3287
Slx4ip	-0.321024	0.248733	0.965587	62.946	69.1585	39.8945	31.3594	40.9017	38.4127	44.0296	28.9617
Nt5e	-0.320745	0.369026	0.978328	30.8034	21.2795	36.0024	20.5042	9.62394	24.5047	25.3818	31.1895
Ccdc3	-0.320737	0.375485	0.978328	37.4997	39.8991	71.5183	32.5655	34.8868	22.849	62.1595	26.7339
mt-Rnr1	-0.320598	0.0580006	0.874101	17812.4	11525.5	9468.14	9816.7	10915.9	9205.81	9770.95	9036.05
Colec12	-0.320353	0.0706513	0.894412	92.4101	106.398	87.5734	94.0782	76.9915	81.4615	71.4834	64.6069
Mndal	-0.31979	0.350124	0.978045	20.0891	34.5792	18.4877	28.9471	16.8419	18.2129	17.6118	28.9617
Gm10250	-0.31968	0.434921	0.983843	44.1961	21.2795	21.4068	9.64904	18.0449	21.5244	14.5039	24.5061
Zfp583	-0.319632	0.222219	0.957959	42.8568	39.8991	56.4362	43.4207	38.4957	39.075	27.9718	51.2399
Neb	-0.319529	0.0752095	0.896453	198.213	367.072	336.185	359.427	232.177	297.368	237.76	233.921
Gm42847	-0.319477	0.423369	0.983843	18.7499	10.6398	14.5956	20.5042	18.0449	11.2589	13.9859	8.91129
Gm11223	-0.319456	0.590977	0.989883	37.4997	0	19.4608	6.03065	9.62394	19.5375	11.3959	11.1391
Map2	-0.31923	0.0123015	0.866547	3953.54	2859.44	2698.23	2763.25	2650.19	2499.15	2203.03	2488.48
Il17rb	-0.31899	0.545148	0.987859	12.0535	5.31988	5.83823	15.6797	7.21795	8.60975	6.73394	8.91129
Gm45884	-0.318685	0.0471178	0.866615	538.389	542.628	493.817	494.514	489.618	390.75	286.969	507.944
Fxyd5	-0.318356	0.404231	0.983843	20.0891	23.9395	23.8394	13.2674	22.8568	11.2589	15.0219	20.0504
Chic1	-0.318242	0.0269175	0.866547	412.497	324.513	273.91	300.327	261.049	263.26	240.35	287.389
Nubpl	-0.318038	0.417961	0.983843	48.2139	31.9193	15.0821	20.5042	16.8419	21.8555	30.0437	17.8226
Slc25a15	-0.317945	0.0883231	0.896453	79.0173	85.1181	79.3026	103.727	67.3675	73.1829	64.2314	73.5182
Pcdhgb4	-0.317719	0.327102	0.976482	32.1426	26.5994	30.1642	18.092	16.8419	25.167	18.6478	26.7339
Spata13	-0.317672	0.29745	0.976482	29.4641	58.5187	31.1372	30.1533	21.6539	30.4653	34.1877	22.2782
Aldh1a1	-0.317364	0.01851	0.866547	1545.52	1537.45	1682.38	1407.55	1369	1126.55	1500.11	944.597
AW011738	-0.317288	0.280722	0.975338	20.0891	45.219	37.462	36.1839	33.6838	27.1538	24.8638	24.5061
Cadm2	-0.317059	0.0027985	0.747015	1027.22	896.4	820.757	967.317	807.208	717.258	679.61	784.194
Acvr1c	-0.316994	0.0575717	0.874101	125.892	109.058	135.252	148.354	125.111	101.661	108.261	82.4295
Sh3gl3	-0.316759	0.602563	0.990624	124.553	18.6196	26.272	42.2146	43.3077	33.7767	53.3535	40.1008
Gm42967	-0.316498	0.371819	0.978328	25.4462	21.2795	18.9742	28.9471	25.2628	19.2064	11.9139	22.2782
6230400D17Rik	-0.316401	0.429251	0.983843	14.732	18.6196	19.4608	25.3287	13.2329	22.1867	15.5399	6.68347
Wdr34	-0.316389	0.26842	0.971476	60.2674	77.1383	43.3002	50.6575	45.7137	43.3799	61.6415	20.0504
Med11	-0.315729	0.356881	0.978328	22.7677	23.9395	26.7585	25.3287	16.8419	19.2064	27.9718	11.1391
Gabrb2	-0.315713	0.0138269	0.866547	1309.81	1244.85	1241.11	1431.68	1240.28	1126.55	810.145	1029.25
Dscr3	-0.314708	0.0482383	0.870262	195.534	146.297	175.633	180.92	149.171	158.287	144.521	100.252
Rpl36a	-0.314598	0.440518	0.983843	482.139	255.354	285.1	295.502	297.139	288.758	364.151	104.708
Pcdhb19	-0.31417	0.151496	0.949538	54.9103	66.4985	74.4374	59.1004	52.9316	58.9437	43.5116	51.2399
Aif1	-0.314169	0.417128	0.983843	18.7499	26.5994	17.0282	10.8552	14.4359	15.8949	11.9139	13.3669
Pm20d1	-0.314107	0.302406	0.976482	34.8212	39.8991	37.9485	24.1226	28.8718	27.485	33.6697	13.3669
Trmt10b	-0.31395	0.0871782	0.896453	137.945	103.738	111.899	100.109	113.081	79.1435	94.7932	80.2017
Homer2	-0.313832	0.0756473	0.896453	139.285	175.556	147.902	143.53	117.893	141.73	90.6492	135.897
Zfp51	-0.313811	0.316785	0.976482	57.5889	45.219	37.462	31.3594	54.1346	28.1473	23.3098	35.6452
Mum1l1	-0.313765	0.475551	0.985484	33.4819	10.6398	12.6495	12.0613	12.0299	14.2392	11.3959	20.0504
Slc25a14	-0.313605	0.0552182	0.874101	163.392	127.677	143.523	127.85	127.517	122.523	109.815	86.8851
Gm16754	-0.313546	0.451551	0.983843	13.3928	34.5792	15.0821	13.2674	16.8419	11.59	17.6118	8.91129
Zfp804a	-0.313491	0.322058	0.976482	65.6245	45.219	32.5968	28.9471	50.5257	31.1276	29.5257	24.5061
Msmo1	-0.313426	0.0959471	0.903808	352.23	188.856	196.067	231.577	190.073	186.765	223.774	175.998
Ranbp3l	-0.313407	0.1776	0.950531	64.2853	66.4985	47.1923	60.3065	43.3077	46.3602	55.4255	35.6452
Zfp850	-0.313256	0.205747	0.955078	74.9995	61.1787	62.2744	65.1311	54.1346	45.3668	39.8856	86.8851
Rnasel	-0.313221	0.52099	0.987859	16.0713	10.6398	9.73038	7.23678	9.62394	6.95403	10.8779	6.68347
Gm9761	-0.313087	0.473414	0.985012	28.1248	15.9596	15.5686	10.8552	13.2329	20.5309	9.32392	11.1391
Smim1	-0.312899	0.393489	0.97921	54.9103	18.6196	21.4068	22.9165	24.0598	19.5375	29.0077	22.2782
Cd83	-0.312852	0.308102	0.976482	156.695	55.8588	55.4632	63.9249	61.3526	55.3011	80.2893	71.2904
Grid1	-0.312661	0.178565	0.950531	101.785	63.8386	55.9497	68.7494	51.7287	64.9043	60.6055	49.0121
Dnah7b	-0.312508	0.0415094	0.866547	160.713	138.317	146.929	170.064	125.111	136.1	126.909	98.0242
Enpep	-0.312415	0.516313	0.987859	9.37493	5.31988	13.6225	14.4736	8.42094	11.2589	8.80592	6.68347
Cep295	-0.312037	0.037111	0.866547	229.016	244.715	258.828	312.388	204.509	244.384	177.154	218.327
Pdk1	-0.311715	0.0380497	0.866547	186.159	175.556	144.01	177.301	143.156	134.445	143.485	115.847
Otud6b	-0.311639	0.0214293	0.866547	745.977	542.628	558.037	587.386	582.248	479.828	486.398	407.692
Wnt2b	-0.311548	0.241405	0.963218	42.8568	39.8991	35.5159	45.833	31.2778	26.8227	33.1517	46.7843
Tmx3	-0.311044	0.00600936	0.827554	806.244	755.423	752.645	847.91	706.156	583.807	557.881	726.271
Nrsn1	-0.310692	0.156929	0.949956	708.477	396.331	315.751	312.388	310.372	333.793	400.928	347.54
Ppp2r2b	-0.310572	0.161159	0.949956	352.23	170.236	162.984	177.301	170.825	185.772	182.852	151.492
Ccnyl1	-0.31001	0.171806	0.949956	57.5889	50.5389	64.2205	53.0697	33.6838	49.6716	47.1376	55.6956
Gstm5	-0.309694	0.157268	0.949956	529.014	343.132	238.394	258.112	250.222	261.273	341.359	240.605
Slc26a2	-0.309649	0.126293	0.933869	68.3031	71.8184	88.0599	85.6353	50.5257	62.9174	75.1093	66.8347
Ctdspl	-0.309559	0.226341	0.961301	60.2674	42.5591	40.3811	42.2146	28.8718	40.0685	41.9576	33.4174
Gm14824	-0.309274	0.398045	0.981601	21.4284	29.2594	29.6777	25.3287	38.4957	19.5375	13.4679	15.5948
1810022K09Rik	-0.309228	0.143219	0.94857	112.499	87.7781	78.8161	74.7801	81.8035	56.2945	69.4114	84.6573
Rnf213	-0.308839	0.101832	0.908143	127.231	140.977	103.142	94.0782	83.0064	83.1172	111.369	86.8851
Snrnp35	-0.308394	0.22502	0.961292	57.5889	53.1988	45.7328	32.5655	31.2778	35.7636	39.3677	46.7843
Tmem35b	-0.308303	0.338889	0.976482	20.0891	31.9193	29.6777	30.1533	26.4658	21.1932	26.9358	11.1391
2210408I21Rik	-0.308274	0.343822	0.976482	48.2139	34.5792	26.272	26.5349	15.6389	32.7833	23.8278	35.6452
Gm15612	-0.308019	0.371937	0.978328	34.8212	13.2997	35.5159	26.5349	18.0449	29.803	25.3818	15.5948
Zc3hav1	-0.307852	0.104309	0.916331	104.464	148.957	94.8712	83.223	81.8035	81.4615	87.0232	86.8851
Zfp638	-0.307513	0.00847402	0.838674	1015.17	992.158	820.757	1042.1	857.733	765.605	668.732	839.89
Rbp1	-0.307052	0.325662	0.976482	42.8568	47.8789	32.5968	19.2981	22.8568	25.4981	34.7057	26.7339
Gdap10	-0.306981	0.180071	0.950533	50.8925	82.4582	70.5452	66.3372	51.7287	51.6585	44.5476	77.9738
NA	-0.306816	0.403907	0.983843	18.7499	18.6196	15.5686	21.7104	14.4359	16.8884	14.5039	11.1391
Igsf6	-0.306705	0.501398	0.98668	13.3928	21.2795	11.6765	9.64904	16.8419	10.5966	9.32392	4.45565
Pvt1	-0.306518	0.341939	0.976482	32.1426	29.2594	20.4338	24.1226	19.2479	21.5244	23.3098	15.5948
Nyap2	-0.306397	0.0549609	0.874101	131.249	167.576	129.901	130.262	115.487	106.628	99.9731	131.442
Hdc	-0.30614	0.333279	0.976482	26.7855	21.2795	24.3259	31.3594	15.6389	24.1735	22.2738	20.0504
Caskin2	-0.306068	0.180302	0.950533	65.6245	42.5591	68.5992	62.7188	45.7137	57.9502	51.2815	37.873
Trpm4	-0.305982	0.343902	0.976482	28.1248	29.2594	25.299	45.833	24.0598	34.1079	21.2378	20.0504
Gm13509	-0.30598	0.352992	0.978045	99.1064	39.8991	69.0857	38.5962	32.4808	70.2026	36.2597	64.6069
Dnase1l2	-0.305857	0.278759	0.975338	25.4462	61.1787	43.7867	41.0084	39.6987	32.4521	26.9358	40.1008
Gm2762	-0.305828	0.602493	0.990624	5.35711	10.6398	14.109	3.61839	8.42094	7.94746	4.14396	8.91129
Gm14399	-0.305759	0.14139	0.948491	61.6067	63.8386	72.9778	78.3985	68.5705	51.3274	50.7636	62.3791
Trim34a	-0.305746	0.477868	0.986143	16.0713	31.9193	12.6495	20.5042	15.6389	10.5966	23.8278	8.91129
Tmem241	-0.30562	0.311052	0.976482	44.1961	15.9596	29.1911	32.5655	26.4658	24.8358	25.8998	24.5061
Lrrc9	-0.305455	0.317264	0.976482	25.4462	31.9193	32.1102	20.5042	22.8568	22.5178	22.7918	20.0504
Kbtbd8	-0.305084	0.158825	0.949956	58.9282	61.1787	56.4362	60.3065	51.7287	53.3142	41.9576	40.1008
Adcy7	-0.305079	0.167742	0.949956	73.6602	85.1181	68.1126	48.2452	55.3376	51.9896	48.6916	69.0625
Notch2	-0.304952	0.140316	0.948172	97.7672	66.4985	80.2756	66.3372	55.3376	70.2026	68.3754	53.4678
Nkrf	-0.304892	0.0905197	0.898059	233.034	154.277	138.658	156.797	128.72	145.372	148.665	120.302
Xist	-0.30489	0.908018	0.995024	1.33928	0	8047.02	9149.71	8021.55	4.63602	5893.23	2.22782
Gm5577	-0.304545	0.366776	0.978328	16.0713	26.5994	23.8394	25.3287	15.6389	20.1998	15.5399	24.5061
Fabp5	-0.304481	0.189871	0.952987	362.944	148.957	182.931	178.507	158.795	196.369	199.428	149.264
Vcp-rs	-0.304376	0.452402	0.983843	41.5176	34.5792	31.6237	13.2674	12.0299	33.1144	16.0579	37.873
Rhbdl3	-0.304328	0.38406	0.97921	65.6245	29.2594	23.3529	26.5349	27.6688	26.1604	35.7417	24.5061
Mipol1	-0.304233	0.211727	0.955604	56.2496	29.2594	51.0845	51.8636	42.1047	37.7504	42.9936	33.4174
Rpl23a	-0.304132	0.0277474	0.866547	1016.51	869.801	706.912	844.291	715.78	650.698	824.131	572.551
Tmem229a	-0.304065	0.0909334	0.898059	662.942	385.692	396.999	347.366	382.551	320.879	375.029	378.73
Havcr2	-0.303857	0.491544	0.986143	20.0891	21.2795	10.7034	10.8552	19.2479	9.60318	10.8779	8.91129
Gm43059	-0.303845	0.554593	0.987859	5.35711	13.2997	12.6495	7.23678	9.62394	6.29174	7.76993	8.91129
Scd1	-0.303805	0.327408	0.976482	1794.63	816.602	779.403	810.52	778.336	814.284	902.866	908.952
Gm17066	-0.303772	0.159471	0.949956	54.9103	87.7781	65.68	75.9862	50.5257	49.3405	60.0875	71.2904
Chm	-0.303744	0.0108334	0.866547	385.712	380.372	356.618	433.001	352.477	311.607	280.754	320.807
Exoc5	-0.303706	0.00874126	0.838674	433.926	353.772	393.107	433.001	312.778	353.331	299.919	351.996
Vwf	-0.303703	0.333621	0.976482	26.7855	31.9193	27.2451	22.9165	26.4658	16.5572	22.7918	24.5061
Bbof1	-0.30296	0.214731	0.957959	44.1961	47.8789	45.2463	41.0084	33.6838	32.7833	34.7057	49.0121
Fer	-0.302924	0.0828083	0.896453	104.464	109.058	122.116	113.376	101.051	102.986	85.4692	69.0625
Ramp1	-0.302902	0.191758	0.952987	215.623	103.738	124.549	114.582	101.051	113.251	146.075	86.8851
Ccdc17	-0.302814	0.468297	0.983843	13.3928	7.97982	14.109	22.9165	9.62394	12.9146	12.9499	13.3669
Tuft1	-0.302554	0.361285	0.978328	37.4997	23.9395	34.5428	30.1533	20.4509	29.803	35.2237	11.1391
3110082I17Rik	-0.302386	0.387557	0.97921	26.7855	21.2795	30.1642	15.6797	20.4509	20.1998	22.7918	11.1391
Sox6	-0.302374	0.1399	0.948172	79.0173	82.4582	69.0857	65.1311	54.1346	66.8911	49.7276	66.8347
Gm4247	-0.302351	0.544756	0.987859	6.69638	15.9596	8.75734	9.64904	7.21795	8.60975	7.76993	6.68347
Gm22392	-0.302259	0.545979	0.987859	12.0535	7.97982	10.2169	7.23678	7.21795	8.94089	7.25194	6.68347
Cdkl2	-0.302246	0.0824012	0.896453	135.267	90.438	102.655	127.85	97.4423	87.0909	91.1672	102.48
Tmem216	-0.302148	0.204292	0.955078	46.8747	61.1787	46.2193	77.1924	42.1047	47.3536	46.1016	49.0121
Uty	-0.302143	0.925437	0.995044	186.159	159.596	0	0	0	137.756	0	142.581
Yes1	-0.30214	0.0377075	0.866547	158.035	167.576	155.2	170.064	149.171	117.225	131.571	133.669
Frg2f1	-0.301983	0.396631	0.98122	41.5176	29.2594	17.5147	18.092	24.0598	19.5375	18.6478	22.2782
A830073O21Rik	-0.301518	0.502544	0.98668	17.4106	7.97982	13.6225	14.4736	9.62394	15.8949	8.28793	8.91129
5730480H06Rik	-0.30145	0.192534	0.952987	61.6067	71.8184	48.1654	72.3678	63.7586	47.3536	44.5476	46.7843
Zfp788	-0.30133	0.0156468	0.866547	338.837	383.032	337.158	350.984	293.53	248.027	275.574	340.857
Slc35f1	-0.301315	0.0840852	0.896453	154.017	103.738	105.088	121.819	96.2394	96.363	94.2752	111.391
Anapc15	-0.301242	0.225335	0.961301	50.8925	53.1988	38.435	51.8636	38.4957	36.757	45.0656	28.9617
Homer1	-0.301211	0.0470756	0.866615	203.57	273.974	206.771	270.173	180.449	201.336	167.831	222.782
Npm1	-0.301172	0.0341662	0.866547	1459.81	1353.91	945.793	1013.15	1002.09	874.883	1055.16	924.547
L3mbtl1	-0.301071	0.460406	0.983843	32.1426	13.2997	13.136	16.8858	12.0299	18.8752	14.5039	13.3669
Kcnq3	-0.30087	0.0972861	0.905368	259.82	162.256	160.065	164.034	169.622	133.451	142.967	167.087
Leng9	-0.300683	0.351939	0.978045	25.4462	26.5994	35.5159	27.741	24.0598	29.4718	24.8638	11.1391
Aldh1l2	-0.300419	0.175916	0.949956	80.3566	85.1181	99.2498	132.674	99.8483	94.045	61.1235	69.0625
Pcdha1	-0.300336	0.593431	0.990069	5.35711	13.2997	12.163	6.03065	13.2329	6.95403	4.14396	6.68347
Rps20	-0.300273	0.0862852	0.896453	416.515	396.331	275.37	312.388	292.327	277.499	344.985	198.276
Rassf4	-0.300177	0.226291	0.961301	97.7672	69.1585	69.5722	42.2146	62.5556	46.6913	59.5695	60.1512
Kpna3	-0.299932	0.0184745	0.866547	602.674	486.769	426.191	511.399	451.122	402.34	373.475	421.059
Nav3	-0.2999	0.232831	0.961301	113.838	63.8386	52.0575	61.5127	58.9466	53.9765	59.0515	64.6069
Gm26711	-0.299713	0.579917	0.988634	12.0535	18.6196	6.81126	9.64904	9.62394	12.9146	3.62597	8.91129
Ginm1	-0.299705	0.0910028	0.898059	145.981	138.317	128.927	112.17	105.863	90.7335	130.535	93.5686
Rasd2	-0.299615	0.144562	0.94857	79.0173	79.7982	62.7609	66.3372	45.7137	62.2551	57.4975	62.3791
Dnah9	-0.29958	0.662753	0.992181	26.7855	5.31988	8.27082	1.20613	15.6389	4.30487	8.28793	6.68347
Zfp36l2	-0.299452	0.180843	0.950533	128.571	103.738	82.2217	68.7494	63.7586	74.5075	94.7932	69.0625
Spp1	-0.299388	0.394243	0.980148	230.356	414.951	213.582	135.087	224.959	177.162	236.206	160.403
Gm37123	-0.299074	0.493867	0.986409	16.0713	13.2997	18.0012	16.8858	19.2479	15.2326	5.69795	15.5948
2810049E08Rik	-0.29902	0.503113	0.98668	18.7499	5.31988	12.163	13.2674	8.42094	10.2655	11.9139	11.1391
F730043M19Rik	-0.298754	0.0933581	0.901233	81.6959	114.377	97.3038	107.346	90.2244	76.8255	83.3973	69.0625
Gm43328	-0.2987	0.484268	0.986143	13.3928	13.2997	19.9473	20.5042	7.21795	13.9081	11.3959	28.9617
Uba6	-0.298422	0.014071	0.866547	269.195	265.994	262.72	274.998	236.989	229.814	195.284	209.415
Grin2b	-0.298339	0.203281	0.954787	135.267	66.4985	78.3295	88.0475	67.3675	82.1238	59.5695	98.0242
Ccdc88a	-0.298185	0.00278457	0.747015	577.228	579.867	507.926	582.561	482.4	449.363	435.634	454.476
Stk32a	-0.298175	0.137422	0.946337	128.571	191.516	126.981	137.499	159.998	92.3892	104.635	115.847
Ldha	-0.298055	0.0124594	0.866547	747.316	675.625	590.147	563.263	526.91	530.162	563.061	452.248
Hdx	-0.297983	0.158012	0.949956	77.678	58.5187	73.9509	101.315	76.9915	67.5534	58.5335	51.2399
Uhmk1	-0.297865	0.00269565	0.747015	1576.33	1335.29	1229.92	1254.38	1109.16	1084.17	1120.94	1064.9
D16Ertd472e	-0.297759	0.400025	0.983033	34.8212	34.5792	24.8125	18.092	16.8419	27.1538	14.5039	33.4174
6330403L08Rik	-0.297547	0.351605	0.978045	61.6067	34.5792	29.6777	53.0697	38.4957	37.0882	46.6196	15.5948
Ankrd61	-0.297425	0.508477	0.987859	13.3928	7.97982	16.0551	19.2981	4.81197	14.2392	10.8779	20.0504
Rfx3	-0.297188	0.0562982	0.874101	164.731	167.576	190.229	244.845	169.622	160.274	144.003	158.175
Asf1a	-0.297177	0.0496414	0.871226	155.356	191.516	175.633	179.713	175.637	134.776	128.463	133.669
Plekhg5	-0.297094	0.483938	0.986143	52.2318	15.9596	22.3799	20.5042	9.62394	29.1407	30.5617	17.8226
Larp4	-0.296897	0.00729679	0.836865	427.229	516.029	420.352	472.803	362.101	364.259	352.237	414.375
Sik2	-0.296816	0.0774588	0.896453	103.124	111.718	100.223	95.2843	78.1945	88.0844	76.6633	89.1129
mt-Nd5	-0.296785	0.0327687	0.866547	30136.4	21367.3	18616.6	22385.8	19297.2	15919.4	19705.1	20391.3
Hibch	-0.296692	0.0575244	0.874101	155.356	162.256	127.954	135.087	127.517	121.53	110.333	100.252
Tnfsfm13	-0.296439	0.578207	0.988634	13.3928	13.2997	5.83823	9.64904	10.8269	9.27204	4.14396	8.91129
Slc9b2	-0.296416	0.481562	0.986143	17.4106	5.31988	18.0012	14.4736	12.0299	10.9278	11.9139	15.5948
Cx3cr1	-0.2962	0.131045	0.938381	117.856	140.977	116.765	85.6353	76.9915	102.986	106.189	73.5182
Hfm1	-0.296187	0.531096	0.987859	26.7855	7.97982	10.2169	15.6797	10.8269	18.2129	9.32392	8.91129
Smc2	-0.296145	0.0846813	0.896453	108.481	109.058	92.9251	106.139	95.0364	83.4483	75.1093	84.6573
Uba7	-0.296099	0.518727	0.987859	10.7142	10.6398	11.6765	12.0613	8.42094	7.61632	11.9139	8.91129
Chordc1	-0.29607	0.00998693	0.844248	731.245	702.225	647.07	616.333	646.007	507.975	497.276	550.272
C230012O17Rik	-0.296037	0.562299	0.987859	10.7142	13.2997	8.27082	7.23678	10.8269	8.27861	6.21595	4.45565
Zfp945	-0.295953	0.177719	0.950531	83.0351	95.7579	59.3553	60.3065	56.5406	57.288	52.8355	73.5182
Enpp6	-0.295889	0.276337	0.975338	46.8747	101.078	88.0599	65.1311	44.5107	74.1763	74.5913	40.1008
Slc6a7	-0.295817	0.396637	0.98122	99.1064	45.219	32.5968	27.741	46.9167	36.4259	43.5116	37.873
Slc44a5	-0.295655	0.230906	0.961301	53.5711	47.8789	51.0845	66.3372	38.4957	56.2945	34.7057	49.0121
Zbtb41	-0.295607	0.0399593	0.866547	241.07	273.974	202.392	274.998	224.959	201.667	184.924	184.909
Sult1a1	-0.295406	0.296034	0.976482	60.2674	55.8588	47.6788	30.1533	50.5257	31.1276	45.5836	26.7339
Kti12	-0.29521	0.45478	0.983843	17.4106	23.9395	21.8933	18.092	10.8269	15.8949	25.3818	8.91129
Zfp995	-0.294869	0.326151	0.976482	36.1605	23.9395	29.6777	36.1839	32.4808	29.1407	18.6478	24.5061
Trp53inp2	-0.294655	0.00973892	0.844248	843.744	728.824	758.969	624.776	646.007	575.198	636.098	548.045
Pcm1	-0.294567	0.0172803	0.866547	818.298	875.121	769.673	861.177	749.464	699.377	527.319	741.865
Zfp715	-0.294457	0.0238429	0.866547	219.641	276.634	217.474	243.638	193.682	180.142	204.09	191.593
Adrb2	-0.294451	0.523321	0.987859	6.69638	23.9395	14.109	9.64904	9.62394	11.59	8.28793	13.3669
Iqsec3	-0.294237	0.149551	0.948886	598.656	327.173	317.697	268.967	281.5	331.475	300.955	318.579
Bmp7	-0.294003	0.418611	0.983843	32.1426	18.6196	17.0282	22.9165	10.8269	17.5506	20.2018	26.7339
Pign	-0.293758	0.0715857	0.894412	183.481	180.876	141.577	139.911	129.923	127.822	113.441	158.175
Gm45893	-0.293733	0.537285	0.987859	9.37493	7.97982	15.5686	13.2674	13.2329	8.27861	6.73394	15.5948
Mboat2	-0.293598	0.0815861	0.896453	129.91	151.617	126.495	97.6966	103.457	100.668	108.261	89.1129
Wdr47	-0.293529	0.0300689	0.866547	541.068	367.072	402.351	501.75	394.581	391.081	337.215	360.907
BC065397	-0.293481	0.343233	0.976482	25.4462	21.2795	27.2451	33.7717	22.8568	26.1604	20.2018	17.8226
Gm47483	-0.293441	0.274834	0.974842	38.839	34.5792	34.5428	37.39	24.0598	29.4718	27.4538	42.3287
Grb10	-0.293359	0.0812475	0.896453	374.997	252.694	227.691	224.34	238.192	211.932	208.234	222.782
Zufsp	-0.293343	0.16034	0.949956	77.678	63.8386	70.0587	85.6353	74.5855	61.5928	48.1736	64.6069
Zswim7	-0.293221	0.374784	0.978328	25.4462	29.2594	21.8933	21.7104	15.6389	16.8884	24.8638	20.0504
Entpd3	-0.293218	0.513148	0.987859	21.4284	10.6398	12.163	10.8552	6.01496	10.2655	13.9859	15.5948
4932438A13Rik	-0.293127	0.0155996	0.866547	1185.26	1223.57	1162.29	1270.06	1110.36	1040.79	760.417	1049.3
Kif5b	-0.293107	0.0238595	0.866547	3005.34	2191.79	1933.91	2171.04	1982.53	1728.9	1932.64	1949.35
Gprasp1	-0.292991	0.0461236	0.866547	4395.5	2726.44	2593.63	2905.57	2600.87	2640.88	2534.55	2524.12
Washc3	-0.292948	0.249181	0.965738	58.9282	53.1988	45.7328	33.7717	30.0748	40.3996	42.9936	37.873
Efs	-0.292882	0.269455	0.971476	45.5354	53.1988	32.1102	45.833	26.4658	37.0882	37.2957	35.6452
Rnf43	-0.292808	0.522546	0.987859	8.03566	23.9395	14.109	10.8552	8.42094	11.9212	13.9859	6.68347
Zfp369	-0.292785	0.0963529	0.904138	101.785	93.0979	108.007	103.727	103.457	75.832	83.9153	73.5182
Aff3	-0.292782	0.333579	0.976482	109.821	63.8386	68.5992	45.833	31.2778	64.9043	52.8355	91.3408
Acot9	-0.292564	0.169837	0.949956	76.3387	69.1585	67.1396	59.1004	60.1496	59.9371	56.9795	35.6452
Vamp7	-0.292317	0.0296328	0.866547	380.354	332.493	284.614	331.686	297.139	247.365	293.185	236.149
Rpl10a-ps1	-0.292096	0.699052	0.992384	26.7855	2.65994	4.37867	3.61839	1.20299	11.59	5.17995	13.3669
Eif5a2	-0.291771	0.0337982	0.866547	652.228	542.628	459.274	422.146	433.077	403.334	411.806	445.565
Olfml1	-0.291669	0.158947	0.949956	80.3566	98.4178	72.9778	73.574	56.5406	59.2748	81.3253	57.9234
Ccp110	-0.291643	0.00599109	0.827554	707.138	664.985	621.771	675.433	609.917	551.686	478.11	543.589
Prss53	-0.291536	0.583372	0.988958	4.01783	7.97982	14.109	9.64904	7.21795	7.28517	8.28793	8.91129
Fam60a	-0.291485	0.553291	0.987859	10.7142	15.9596	8.75734	9.64904	10.8269	5.62945	8.28793	13.3669
Hsp90aa1	-0.291293	0.0479366	0.870262	7553.52	5258.7	5342.46	4934.28	5643.24	4600.59	4795.6	3820.72
Gm20743	-0.291201	0.397616	0.98122	21.4284	45.219	43.3002	25.3287	21.6539	39.7373	22.2738	22.2782
Gm44986	-0.291151	0.463141	0.983843	17.4106	13.2997	18.4877	21.7104	18.0449	19.2064	11.9139	6.68347
P4ha2	-0.290837	0.279557	0.975338	66.9638	39.8991	33.5698	47.0391	42.1047	34.1079	37.2957	40.1008
Gm10222	-0.290741	0.757524	0.993901	74.9995	21.2795	36.0024	10.8552	7.21795	25.4981	7.25194	80.2017
Ubxn2b	-0.290352	0.108885	0.916331	155.356	218.115	171.741	162.828	192.479	143.717	124.837	106.936
Slitrk5	-0.290274	0.296497	0.976482	91.0708	39.8991	46.7058	50.6575	49.3227	50.3339	52.8355	28.9617
Gpsm2	-0.290193	0.455771	0.983843	41.5176	39.8991	14.5956	21.7104	20.4509	19.8687	32.1157	15.5948
Srgn	-0.290098	0.415412	0.983843	16.0713	37.2392	27.2451	15.6797	15.6389	16.8884	22.2738	22.2782
Cfap100	-0.290088	0.390075	0.97921	29.4641	23.9395	21.4068	19.2981	13.2329	20.1998	22.2738	17.8226
Lin54	-0.28989	0.173332	0.949956	60.2674	61.1787	69.0857	77.1924	44.5107	54.9699	52.8355	75.746
Csrnp1	-0.289633	0.373527	0.978328	24.107	45.219	29.6777	18.092	25.2628	24.5047	23.3098	15.5948
Dhx58	-0.289547	0.446334	0.983843	12.0535	23.9395	18.0012	19.2981	14.4359	15.8949	16.0579	8.91129
Rnf217	-0.28932	0.08615	0.896453	170.088	210.135	144.01	200.218	167.216	151.333	120.175	147.036
Crot	-0.289273	0.0266013	0.866547	245.088	244.715	203.365	220.722	194.885	173.851	181.298	196.048
Evi2a	-0.28915	0.164378	0.949956	243.748	292.594	176.12	139.911	164.81	182.792	198.392	129.214
Gm9800	-0.289086	0.414152	0.983843	69.6424	21.2795	49.1384	31.3594	31.2778	32.4521	24.3458	64.6069
Zfp773	-0.288899	0.462688	0.983843	24.107	23.9395	18.0012	10.8552	12.0299	11.9212	16.5759	24.5061
Cys1	-0.288516	0.463638	0.983843	20.0891	10.6398	13.136	20.5042	10.8269	13.2458	13.9859	15.5948
Nol3	-0.288466	0.335488	0.976482	38.839	26.5994	26.272	32.5655	26.4658	21.8555	31.0797	20.0504
Ranbp2	-0.288455	0.0130732	0.866547	1304.46	1465.63	1414.31	1472.69	1298.03	1176.56	918.924	1252.04
Dcun1d4	-0.288334	0.109076	0.916331	427.229	276.634	225.258	281.028	218.945	252.001	239.314	280.706
Fv1	-0.288232	0.269785	0.971476	28.1248	63.8386	55.9497	49.4514	43.3077	42.7176	38.3317	33.4174
Tmem158	-0.288066	0.467449	0.983843	20.0891	13.2997	12.6495	20.5042	10.8269	16.2261	12.4319	13.3669
Fam102b	-0.287844	0.044689	0.866547	190.177	236.735	220.88	180.92	145.562	168.552	169.385	198.276
Crnkl1	-0.287662	0.092424	0.899564	144.642	178.216	173.687	158.003	152.78	128.815	103.081	164.859
Cyp51	-0.287513	0.13481	0.943101	455.354	260.674	239.854	258.112	229.771	287.433	232.062	240.605
Gm37296	-0.287504	0.594012	0.990103	4.01783	5.31988	16.5416	20.5042	8.42094	10.5966	6.73394	17.8226
C8g	-0.287431	0.517213	0.987859	10.7142	10.6398	14.5956	14.4736	7.21795	10.5966	13.9859	8.91129
C530008M17Rik	-0.287225	0.256569	0.969966	167.41	63.8386	82.2217	86.8414	92.6304	82.7861	87.0232	64.6069
Rps23-ps1	-0.287111	0.565168	0.987999	24.107	15.9596	12.163	3.61839	12.0299	11.2589	7.76993	15.5948
Ddx4	-0.287065	0.570984	0.988036	13.3928	7.97982	7.7843	8.44291	6.01496	7.94746	6.73394	11.1391
Slc39a10	-0.287004	0.0378885	0.866547	558.478	372.392	419.379	384.756	383.754	369.557	329.963	343.085
Cd55	-0.286884	0.53633	0.987859	17.4106	15.9596	12.163	8.44291	13.2329	6.62288	14.5039	8.91129
Zfp933	-0.286862	0.110503	0.916924	131.249	194.176	192.175	206.248	182.855	132.458	125.355	162.631
Ermn	-0.286603	0.102857	0.908143	916.065	579.867	570.687	513.812	617.135	493.074	573.421	425.514
Cd44	-0.286597	0.254011	0.969966	37.4997	77.1383	72.4913	48.2452	40.9017	51.9896	48.6916	49.0121
Pafah2	-0.28655	0.517323	0.987859	18.7499	13.2997	20.9203	13.2674	9.62394	15.8949	20.7198	4.45565
Cavin1	-0.28641	0.308962	0.976482	49.5532	90.438	45.7328	31.3594	34.8868	44.3733	42.4756	46.7843
Wdfy2	-0.286328	0.347238	0.977646	42.8568	45.219	56.4362	68.7494	36.0898	64.242	25.3818	51.2399
Myo1f	-0.286315	0.527775	0.987859	16.0713	23.9395	18.0012	4.82452	13.2329	10.9278	15.5399	8.91129
Eng	-0.286268	0.450068	0.983843	12.0535	29.2594	23.3529	18.092	9.62394	18.8752	18.6478	17.8226
Pyroxd1	-0.286231	0.150501	0.949538	85.7137	77.1383	71.0318	85.6353	75.7885	71.196	59.0515	49.0121
A330076H08Rik	-0.285902	0.150805	0.949538	143.303	234.075	174.174	230.371	159.998	164.579	114.477	207.188
Ift88	-0.285807	0.0887367	0.896453	128.571	106.398	115.791	120.613	104.66	107.291	93.7572	73.5182
Zfp790	-0.285673	0.124175	0.933869	103.124	98.4178	111.899	126.644	81.8035	84.7729	82.3613	129.214
Snx7	-0.285657	0.480122	0.986143	36.1605	15.9596	16.5416	10.8552	19.2479	14.9015	14.5039	17.8226
Zbtb37	-0.285643	0.0912683	0.89827	182.142	175.556	252.017	232.783	215.336	169.215	144.521	180.454
Mybl1	-0.285628	0.106831	0.916331	97.7672	132.997	101.682	127.85	95.0364	99.3433	79.2533	100.252
A630052C17Rik	-0.285297	0.34247	0.976482	33.4819	34.5792	31.1372	24.1226	22.8568	31.1276	22.2738	20.0504
Gm37074	-0.285256	0.624249	0.991617	5.35711	21.2795	11.1899	6.03065	13.2329	7.61632	10.3599	0
Spsb2	-0.285248	0.385342	0.97921	26.7855	31.9193	25.7855	16.8858	26.4658	17.2195	20.7198	17.8226
Zfp60	-0.285215	0.0184371	0.866547	326.783	268.654	275.856	288.265	261.049	234.119	239.314	213.871
Spx	-0.285209	0.417228	0.983843	28.1248	10.6398	21.8933	22.9165	20.4509	19.8687	15.0219	15.5948
Arhgef6	-0.285105	0.163315	0.949956	84.3744	87.7781	61.3014	71.1617	55.3376	56.6257	65.7854	66.8347
Synm	-0.285032	0.198525	0.952987	199.552	138.317	108.007	90.4598	114.284	111.264	114.477	91.3408
Tmed5	-0.284944	0.0550925	0.874101	261.159	242.055	208.23	227.959	217.742	156.962	191.658	211.643
Setmar	-0.284912	0.480872	0.986143	12.0535	26.5994	34.5428	20.5042	27.6688	22.5178	18.1298	6.68347
D930016D06Rik	-0.284656	0.0426257	0.866547	180.802	191.516	198.986	246.051	181.652	165.572	161.615	167.087
Poglut1	-0.284567	0.0524581	0.874101	346.873	255.354	237.908	235.195	218.945	216.237	232.062	209.415
NA	-0.284534	0.112618	0.917415	334.819	343.132	201.905	265.349	215.336	266.902	247.084	184.909
Tgfb1	-0.284372	0.493921	0.986409	13.3928	18.6196	14.109	12.0613	15.6389	10.9278	11.9139	6.68347
Slc30a7	-0.284321	0.103344	0.909699	113.838	196.836	180.012	165.24	135.938	139.081	116.549	149.264
Fmn1	-0.284266	0.139699	0.948172	95.0886	87.7781	75.8969	73.574	58.9466	74.8386	67.8574	62.3791
Il1rapl1	-0.284095	0.17147	0.949956	95.0886	90.438	63.734	78.3985	64.9616	67.2223	55.9435	80.2017
Gm38104	-0.284047	0.283835	0.976079	70.9816	106.398	111.899	103.727	105.863	77.4877	42.9936	106.936
Zfp961	-0.28404	0.100279	0.905368	158.035	119.697	115.791	155.591	115.487	102.655	105.153	138.125
Nop10	-0.283903	0.199577	0.953571	121.874	109.058	89.033	69.9556	68.5705	80.7992	99.4551	57.9234
Hey2	-0.283799	0.456028	0.983843	21.4284	13.2997	17.0282	15.6797	9.62394	14.9015	15.5399	15.5948
Gjb2	-0.283744	0.339232	0.976482	24.107	50.5389	27.7316	33.7717	28.8718	28.1473	24.8638	22.2782
Adamts20	-0.283622	0.242913	0.963218	81.6959	34.5792	53.5171	66.3372	46.9167	49.3405	55.9435	42.3287
Ets1	-0.283399	0.403049	0.983843	21.4284	18.6196	26.7585	19.2981	15.6389	20.8621	17.6118	17.8226
Syt10	-0.28332	0.20677	0.955078	70.9816	58.5187	63.2475	73.574	56.5406	53.9765	41.9576	77.9738
Adgrl4	-0.28287	0.2748	0.974842	41.5176	85.1181	50.598	55.482	61.3526	41.7242	47.1376	31.1895
Ccdc39	-0.28273	0.0392022	0.866547	200.891	204.815	213.582	235.195	205.712	158.287	171.974	175.998
Ccdc85a	-0.282418	0.207347	0.955078	265.177	130.337	121.143	142.323	120.299	133.782	142.967	144.809
Tgs1	-0.282307	0.0441186	0.866547	267.855	348.452	273.424	266.555	238.192	246.04	195.284	269.567
Ebf4	-0.282117	0.386479	0.97921	41.5176	39.8991	22.3799	22.9165	25.2628	20.5309	23.3098	35.6452
mt-Rnr2	-0.282101	0.0427487	0.866547	35922.1	25309.3	21423.4	25238.3	23306.8	20984.9	23860.4	20569.5
Slc40a1	-0.28196	0.439072	0.983843	18.7499	31.9193	17.0282	19.2981	10.8269	19.8687	16.0579	20.0504
Zfp950	-0.281827	0.00853617	0.838674	405.801	406.971	374.62	416.115	345.259	313.594	311.833	356.452
Evc2	-0.281618	0.567674	0.988036	38.839	7.97982	20.4338	6.03065	14.4359	11.59	20.7198	15.5948
Zfp982	-0.281271	0.573079	0.988634	10.7142	7.97982	9.24386	8.44291	7.21795	7.94746	7.76993	6.68347
Zfp182	-0.281178	0.0795074	0.896453	123.213	132.997	122.116	125.438	119.096	107.622	89.6132	95.7964
Atp10a	-0.281139	0.478228	0.986143	22.7677	21.2795	15.5686	10.8552	13.2329	15.8949	15.0219	8.91129
Sec14l5	-0.281131	0.262813	0.97132	101.785	50.5389	79.7891	49.4514	58.9466	68.2157	47.6556	62.3791
Gm37397	-0.280987	0.619891	0.991617	17.4106	10.6398	7.7843	10.8552	1.20299	15.2326	9.84191	8.91129
Igsf3	-0.280925	0.290851	0.976482	65.6245	31.9193	45.7328	36.1839	38.4957	42.3865	34.1877	33.4174
Il10ra	-0.279334	0.463471	0.983843	18.7499	21.2795	25.299	12.0613	16.8419	17.5506	18.1298	8.91129
R74862	-0.279305	0.412241	0.983843	42.8568	21.2795	26.272	26.5349	18.0449	32.7833	24.8638	15.5948
Ttc3	-0.279288	0.0108733	0.866547	5469.6	4338.36	3935.94	4467.51	3912.13	4009.16	3465.39	3611.3
Rnf113a1	-0.279262	0.459012	0.983843	18.7499	18.6196	33.0833	14.4736	18.0449	21.5244	18.1298	13.3669
Chd3os	-0.279172	0.15363	0.949956	774.102	417.611	392.621	385.962	399.393	396.048	443.922	380.958
Nbn	-0.278907	0.0664094	0.88683	175.445	146.297	131.36	155.591	128.72	119.212	122.765	131.442
Drp2	-0.278693	0.0654714	0.88661	190.177	148.957	140.604	150.766	129.923	129.146	123.801	138.125
Lama1	-0.278677	0.367944	0.978328	20.0891	39.8991	31.1372	27.741	28.8718	26.4915	20.7198	17.8226
Togaram1	-0.278471	0.075881	0.896453	265.177	188.856	207.744	174.889	179.246	189.746	152.809	169.315
Gm9776	-0.278373	0.597467	0.990422	9.37493	5.31988	10.7034	9.64904	6.01496	10.2655	5.17995	8.91129
Eif3e	-0.278354	0.044758	0.866547	641.513	545.288	452.949	489.689	454.731	443.402	486.916	347.54
Top1mt	-0.278008	0.308072	0.976482	50.8925	50.5389	33.5698	39.8023	43.3077	37.0882	34.1877	20.0504
Heph	-0.277967	0.413554	0.983843	79.0173	85.1181	36.9754	34.9778	40.9017	42.7176	71.4834	26.7339
Gipr	-0.277901	0.55369	0.987859	22.7677	10.6398	10.7034	9.64904	6.01496	14.2392	9.84191	13.3669
D130040H23Rik	-0.277817	0.21046	0.955078	64.2853	58.5187	66.1666	85.6353	62.5556	54.3077	45.5836	75.746
Lrrtm2	-0.277804	0.0346561	0.866547	348.212	348.452	284.127	309.976	295.936	235.444	246.048	291.845
Mrpl54	-0.277609	0.334087	0.976482	29.4641	47.8789	28.2181	33.7717	25.2628	27.1538	31.5977	22.2782
Dmd	-0.277564	0.0517317	0.874101	415.176	255.354	333.752	361.839	306.763	302.997	258.48	267.339
Zfp493	-0.277294	0.418642	0.983843	25.4462	23.9395	24.3259	15.6797	24.0598	19.2064	15.0219	15.5948
Bdnf	-0.27727	0.115105	0.921161	120.535	93.0979	90.4925	102.521	81.8035	90.0712	77.1813	84.6573
E230029C05Rik	-0.277246	0.448551	0.983843	12.0535	50.5389	21.8933	36.1839	22.8568	22.1867	21.7558	28.9617
4933407L21Rik	-0.277196	0.491436	0.986143	13.3928	13.2997	14.109	24.1226	9.62394	15.8949	12.4319	15.5948
9330136K24Rik	-0.27705	0.462097	0.983843	22.7677	13.2997	15.0821	18.092	15.6389	14.2392	11.9139	17.8226
Tm2d3	-0.277006	0.164856	0.949956	176.784	132.997	101.682	124.231	116.69	101.33	127.945	84.6573
NA	-0.277005	0.251548	0.96774	64.2853	39.8991	53.0306	66.3372	57.7436	36.4259	50.2456	46.7843
Arhgap5	-0.276924	0.0167379	0.866547	1617.85	1548.09	1637.62	1945.49	1538.63	1424.58	1146.84	1479.27
Tmtc1	-0.276818	0.0936297	0.901513	250.445	148.957	180.012	165.24	158.795	152.326	144.521	169.315
Grm7	-0.27672	0.218417	0.957959	154.017	77.1383	79.3026	109.758	78.1945	82.1238	83.9153	109.163
Gtdc1	-0.276534	0.229845	0.961301	116.517	82.4582	63.734	100.109	69.7735	85.7664	80.2893	51.2399
Caap1	-0.276419	0.257274	0.969966	48.2139	34.5792	56.9227	50.6575	37.2927	41.0619	47.1376	33.4174
Stk36	-0.276003	0.290945	0.976482	37.4997	37.2392	33.5698	34.9778	27.6688	27.8161	30.0437	33.4174
Pex7	-0.275864	0.0847177	0.896453	136.606	130.337	109.953	132.674	101.051	99.3433	112.923	100.252
Asb3	-0.275621	0.178184	0.950531	115.178	130.337	87.5734	113.376	119.096	86.7598	69.4114	91.3408
Gas2	-0.275307	0.248543	0.965377	77.678	55.8588	54.9766	54.2759	37.2927	43.711	56.9795	66.8347
Hnmt	-0.275184	0.32371	0.976482	119.196	85.1181	53.0306	44.6268	58.9466	55.3011	69.4114	60.1512
9330162G02Rik	-0.275091	0.0382198	0.866547	578.567	481.449	408.676	464.36	454.731	360.616	374.511	409.92
Fam81a	-0.27477	0.233098	0.961337	125.892	159.596	90.4925	67.5433	93.8334	85.1041	98.9371	73.5182
Gm12198	-0.274762	0.623027	0.991617	2.67855	18.6196	7.7843	15.6797	13.2329	9.27204	6.73394	4.45565
Tmem176b	-0.274755	0.337739	0.976482	113.838	98.4178	81.7352	47.0391	67.3675	65.5666	99.9731	37.873
Wdr12	-0.274751	0.0308839	0.866547	277.23	255.354	233.529	225.546	199.697	190.739	208.752	222.782
Ddx11	-0.274688	0.424986	0.983843	16.0713	18.6196	26.7585	31.3594	20.4509	23.1801	15.5399	20.0504
Nova1	-0.274599	0.0369502	0.866547	665.62	476.13	457.328	535.522	451.122	441.415	468.786	394.325
Cfap36	-0.274424	0.0194099	0.866547	531.693	508.049	419.866	449.887	437.889	388.101	380.727	356.452
Dcaf12l1	-0.274414	0.23608	0.961337	131.249	85.1181	68.5992	69.9556	62.5556	72.5206	82.8793	69.0625
Zfp260	-0.274244	0.0208549	0.866547	491.514	587.847	468.031	536.728	455.934	393.399	391.087	487.893
Ago3	-0.27387	0.0253937	0.866547	578.567	662.325	693.776	711.617	575.03	554.667	451.174	628.246
Vstm2l	-0.273776	0.647125	0.991617	140.624	29.2594	26.272	37.39	46.9167	42.3865	45.0656	60.1512
Chd5	-0.273767	0.212009	0.955974	370.98	210.135	192.661	170.064	164.81	185.441	188.55	247.288
Zfp612	-0.273755	0.00934463	0.844248	376.337	393.671	372.187	398.023	289.921	314.918	327.891	340.857
Pin4	-0.273719	0.231118	0.961301	95.0886	82.4582	58.8688	61.5127	58.9466	53.6454	73.5554	51.2399
Pkmyt1	-0.27359	0.506936	0.987383	22.7677	7.97982	13.6225	16.8858	12.0299	14.5703	13.9859	8.91129
Dnajc15	-0.273538	0.119855	0.925748	111.16	106.398	100.709	88.0475	76.9915	92.3892	85.4692	71.2904
Rab3c	-0.273136	0.109134	0.916331	2228.56	1345.93	1342.79	1285.74	1571.11	1211.33	1142.18	1211.94
G2e3	-0.272896	0.0735779	0.896453	166.07	220.775	190.715	232.783	194.885	153.651	153.327	171.542
Zfp970	-0.272824	0.125506	0.933869	129.91	117.037	124.549	138.705	132.329	89.7401	92.2032	122.53
2610301B20Rik	-0.272746	0.124897	0.933869	203.57	164.916	134.279	131.468	132.329	132.458	142.967	102.48
Usp14	-0.272678	0.068298	0.894412	613.389	391.011	396.026	418.527	395.784	368.564	346.021	403.236
Stxbp3	-0.272517	0.0738457	0.896453	250.445	223.435	176.12	184.538	175.637	153.651	180.262	175.998
Gm12966	-0.272225	0.595244	0.990422	22.7677	5.31988	11.1899	10.8552	9.62394	11.59	5.17995	20.0504
Ptgr2	-0.272159	0.0922245	0.899564	463.39	359.092	269.045	311.182	318.793	267.565	285.933	282.934
4930522L14Rik	-0.27212	0.344712	0.976482	28.1248	34.5792	33.5698	34.9778	33.6838	20.8621	27.4538	31.1895
Xaf1	-0.272091	0.374802	0.978328	40.1783	37.2392	33.5698	22.9165	26.4658	20.1998	35.2237	28.9617
Usp49	-0.272035	0.222697	0.957959	56.2496	45.219	69.5722	80.8108	55.3376	59.606	47.6556	51.2399
Zbtb25	-0.272006	0.197283	0.952987	61.6067	58.5187	59.8418	80.8108	45.7137	53.3142	58.0155	60.1512
Dynlt3	-0.271959	0.0192644	0.866547	855.798	739.464	661.179	668.196	612.323	538.772	655.264	612.652
Crtap	-0.271778	0.542761	0.987859	16.0713	15.9596	13.136	12.0613	12.0299	13.5769	13.9859	2.22782
Gm38198	-0.271665	0.516512	0.987859	10.7142	21.2795	11.1899	18.092	14.4359	10.2655	11.3959	13.3669
Parn	-0.271276	0.0949666	0.902782	172.767	162.256	139.631	131.468	108.269	134.113	136.751	106.936
Ndufaf8	-0.271221	0.351256	0.978045	26.7855	29.2594	32.1102	28.9471	26.4658	22.1867	27.9718	20.0504
Ipo7	-0.271162	0.00635864	0.827554	1090.17	957.579	971.578	1039.68	966.003	812.959	788.907	802.017
Armc9	-0.270976	0.177725	0.950531	101.785	61.1787	86.1138	71.1617	72.1795	66.56	72.5194	55.6956
Pls3	-0.270935	0.0211045	0.866547	1123.65	848.521	854.814	888.918	807.208	803.687	794.087	661.664
Zfp503	-0.27072	0.604468	0.990704	29.4641	7.97982	7.7843	8.44291	14.4359	7.94746	12.9499	8.91129
Rpl22l1	-0.270716	0.0767625	0.896453	393.747	340.472	266.612	276.204	274.282	236.437	298.365	236.149
Rnf32	-0.270584	0.234688	0.961337	46.8747	74.4784	52.544	51.8636	49.3227	48.3471	39.3677	44.5565
Zfp273	-0.270564	0.255063	0.969966	54.9103	45.219	49.6249	53.0697	30.0748	48.3471	39.8856	51.2399
Mmaa	-0.270331	0.0501044	0.871226	194.195	231.415	174.66	195.393	172.028	165.903	156.435	149.264
Ube3a	-0.27022	0.013458	0.866547	1122.31	1026.74	914.169	1142.21	956.379	874.221	766.633	893.357
Pibf1	-0.270144	0.210847	0.955078	93.7493	69.1585	57.4092	72.3678	67.3675	61.2617	52.3175	60.1512
Txlnb	-0.270002	0.475717	0.985484	41.5176	15.9596	18.9742	15.6797	16.8419	21.1932	20.7198	15.5948
Rgs19	-0.269983	0.479293	0.986143	24.107	18.6196	13.6225	15.6797	10.8269	15.2326	14.5039	17.8226
1700126G02Rik	-0.269954	0.545356	0.987859	13.3928	23.9395	9.73038	22.9165	10.8269	17.2195	8.28793	20.0504
Klhl24	-0.269943	0.0100404	0.844248	558.478	609.127	548.307	630.806	540.143	474.861	445.994	485.666
Cp	-0.269934	0.127278	0.934823	132.588	170.236	151.794	120.613	143.156	96.0318	127.427	109.163
Hook3	-0.269909	0.00716425	0.836865	961.6	960.239	985.687	1025.21	903.447	836.801	701.366	833.206
Orc4	-0.269765	0.0247091	0.866547	407.14	521.349	433.002	460.742	418.641	360.285	332.553	401.008
Sdhaf3	-0.269498	0.164679	0.949956	93.7493	85.1181	78.8161	88.0475	67.3675	62.9174	87.0232	64.6069
Rit2	-0.269455	0.0837967	0.896453	917.404	718.184	556.091	563.263	561.797	565.925	631.436	510.172
Slc35g2	-0.269435	0.101389	0.906692	178.124	196.836	136.225	142.323	120.299	124.179	134.679	158.175
Man2a1	-0.269399	0.227617	0.961301	64.2853	61.1787	72.0048	72.3678	78.1945	57.9502	48.1736	40.1008
Agbl5	-0.269344	0.152519	0.949956	91.0708	90.438	69.0857	85.6353	69.7735	67.5534	68.3754	66.8347
Lsm3	-0.26931	0.205732	0.955078	104.464	82.4582	63.2475	77.1924	68.5705	64.242	75.6273	53.4678
Jcad	-0.269292	0.209847	0.955078	129.91	119.697	79.3026	74.7801	91.4274	88.4155	74.5913	69.0625
Sox13	-0.26926	0.472964	0.984566	26.7855	29.2594	14.109	26.5349	18.0449	21.5244	22.7918	8.91129
Mcts2	-0.269032	0.404541	0.983843	38.839	15.9596	23.3529	26.5349	24.0598	23.1801	21.7558	17.8226
Gm10076	-0.26894	0.140567	0.948172	112.499	106.398	84.6543	110.964	92.6304	82.7861	90.6492	66.8347
Vwa5b2	-0.268916	0.33354	0.976482	178.124	66.4985	72.9778	72.3678	73.3825	88.4155	82.8793	77.9738
Lgals1	-0.268784	0.262565	0.97132	89.7315	66.4985	66.1666	56.6881	55.3376	51.6585	77.1813	40.1008
Rps7	-0.268669	0.0940919	0.901753	1667.4	1252.83	1144.78	1224.22	1211.41	1102.71	1294.99	761.916
5930430L01Rik	-0.268615	0.485015	0.986143	17.4106	15.9596	21.8933	18.092	24.0598	10.9278	16.0579	13.3669
Junos	-0.268393	0.554309	0.987859	8.03566	15.9596	13.136	10.8552	12.0299	10.5966	8.80592	6.68347
Polq	-0.268151	0.292914	0.976482	48.2139	31.9193	54.9766	55.482	45.7137	45.6979	30.5617	44.5565
Stard6	-0.268125	0.652196	0.991617	4.01783	10.6398	11.1899	9.64904	12.0299	9.60318	5.69795	0
Sclt1	-0.267926	0.0989121	0.905368	135.267	119.697	121.63	118.201	123.908	101.33	92.2032	95.7964
Far1	-0.267858	0.00456909	0.822451	885.262	893.74	900.06	955.255	826.455	696.065	715.352	802.017
Cep68	-0.267805	0.139269	0.948172	99.1064	106.398	90.979	101.315	79.3975	95.7007	73.5554	71.2904
Ephb6	-0.267717	0.321955	0.976482	88.3922	79.7982	39.8945	54.2759	57.7436	46.6913	61.1235	42.3287
Slc39a12	-0.267683	0.0774642	0.896453	567.853	433.57	430.569	352.19	334.432	342.403	435.634	365.363
Gm44168	-0.267603	0.293145	0.976482	40.1783	34.5792	41.3541	38.5962	37.2927	28.4784	32.6337	35.6452
Hipk2	-0.267528	0.149681	0.948886	344.194	329.833	290.938	248.463	268.267	286.44	161.615	296.301
Gm10037	-0.267489	0.560509	0.987859	14.732	10.6398	10.2169	9.64904	7.21795	10.2655	9.84191	8.91129
Cth	-0.267414	0.522833	0.987859	25.4462	13.2997	12.6495	18.092	24.0598	12.5835	11.9139	8.91129
Cd63	-0.267336	0.0362266	0.866547	749.995	651.686	573.119	537.934	536.534	472.874	581.191	485.666
Fam69a	-0.267254	0.0604589	0.874649	172.767	186.196	178.066	182.126	175.637	134.445	152.809	133.669
Fam13b	-0.267249	0.0318128	0.866547	393.747	409.631	413.541	416.115	374.13	383.796	308.725	276.25
Ccdc151	-0.267061	0.605375	0.990742	18.7499	7.97982	9.24386	4.82452	7.21795	9.27204	8.28793	8.91129
Fam126a	-0.26692	0.257674	0.969966	77.678	87.7781	49.6249	56.6881	50.5257	48.0159	54.9075	69.0625
Crem	-0.26679	0.203123	0.954787	83.0351	82.4582	72.4913	66.3372	67.3675	68.878	65.7854	37.873
Ppp2r3a	-0.266789	0.105317	0.916331	445.979	412.291	269.531	306.357	322.402	264.253	279.2	320.807
Ccdc112	-0.266642	0.256564	0.969966	50.8925	79.7982	52.544	50.6575	54.1346	48.3471	37.2957	51.2399
Cbx5	-0.266415	0.0225336	0.866547	1347.31	992.158	1028.01	1014.36	949.161	889.122	837.081	982.47
Mrpl33	-0.266391	0.118541	0.924947	85.7137	101.078	93.4116	107.346	79.3975	78.4812	82.3613	80.2017
Rnd2	-0.266349	0.458312	0.983843	700.441	303.233	271.964	273.792	299.545	332.8	375.029	278.478
Dzip3	-0.266318	0.0116912	0.866547	902.672	750.103	817.838	919.072	784.351	732.491	651.12	654.98
Aifm2	-0.266301	0.341977	0.976482	48.2139	39.8991	35.5159	39.8023	39.6987	25.4981	29.5257	49.0121
Snx5	-0.266286	0.0440652	0.866547	504.907	566.568	394.567	412.497	398.19	381.809	410.77	343.085
Pcdhgb8	-0.266263	0.392007	0.97921	32.1426	13.2997	38.9215	38.5962	30.0748	30.1341	25.8998	20.0504
Atl1	-0.266222	0.0565637	0.874101	553.121	422.931	363.43	391.992	341.65	372.537	376.065	336.401
Hecw1	-0.266128	0.0856871	0.896453	352.23	239.395	242.286	271.379	259.846	240.08	193.73	229.466
Pdss1	-0.2661	0.102369	0.908143	139.285	130.337	122.603	138.705	131.126	115.238	95.8292	95.7964
Zfp941	-0.26605	0.176044	0.949956	163.392	106.398	103.142	110.964	93.8334	111.264	110.333	75.746
Ttc26	-0.266014	0.456662	0.983843	34.8212	34.5792	35.0294	14.4736	19.2479	28.4784	31.5977	13.3669
Far1os	-0.265888	0.433096	0.983843	24.107	23.9395	32.5968	20.5042	28.8718	21.8555	14.5039	24.5061
Arg2	-0.265562	0.529466	0.987859	10.7142	10.6398	18.0012	26.5349	9.62394	18.5441	13.4679	13.3669
Klf12	-0.265265	0.328939	0.976482	48.2139	31.9193	42.3271	42.2146	38.4957	37.7504	23.8278	44.5565
Gm17705	-0.265253	0.63894	0.991617	9.37493	13.2997	11.1899	4.82452	10.8269	3.97373	11.9139	4.45565
Trim27	-0.265225	0.215537	0.957959	74.9995	77.1383	54.9766	57.8943	51.7287	57.9502	48.6916	55.6956
Lmf2	-0.265018	0.191892	0.952987	54.9103	85.1181	65.68	74.7801	55.3376	57.288	55.4255	62.3791
Nek3	-0.264992	0.429852	0.983843	20.0891	29.2594	32.1102	27.741	18.0449	29.803	24.3458	13.3669
Zfp36l1	-0.264866	0.277965	0.975338	60.2674	61.1787	47.6788	62.7188	58.9466	47.6848	51.2815	24.5061
Agbl3	-0.264789	0.130673	0.938381	103.124	119.697	88.5464	95.2843	89.0214	80.7992	85.4692	71.2904
Ccpg1os	-0.264776	0.514744	0.987859	20.0891	18.6196	20.4338	9.64904	16.8419	13.5769	17.6118	6.68347
Gramd1c	-0.264717	0.502499	0.98668	21.4284	10.6398	17.5147	16.8858	10.8269	11.59	19.1658	15.5948
Acsl5	-0.264665	0.354567	0.978328	85.7137	55.8588	54.4901	38.5962	44.5107	51.3274	63.7134	26.7339
Adamts5	-0.264603	0.490182	0.986143	25.4462	10.6398	13.6225	21.7104	16.8419	14.9015	13.4679	15.5948
Hacd4	-0.264268	0.408382	0.983843	33.4819	26.5994	28.2181	27.741	32.4808	25.8292	15.0219	26.7339
Txlng	-0.264138	0.0491376	0.871226	191.517	199.496	203.851	213.485	193.682	158.949	156.435	173.77
Adamts9	-0.264104	0.58798	0.989883	20.0891	10.6398	19.9473	10.8552	21.6539	14.9015	12.9499	0
Vcan	-0.264067	0.125228	0.933869	200.891	218.115	155.2	199.012	194.885	150.008	125.873	173.77
2900097C17Rik	-0.263954	0.0476571	0.868669	885.262	715.524	594.526	611.508	566.609	624.869	548.039	588.145
Ints8	-0.263952	0.0437923	0.866547	238.391	202.156	217.96	224.34	208.118	188.09	166.277	178.226
NA	-0.263949	0.0220521	0.866547	6756.65	5644.4	4837.46	5475.83	5374.97	4280.37	4488.95	4774.23
Smarcad1	-0.263889	0.0583612	0.874101	188.838	210.135	192.661	221.928	182.855	171.864	145.039	182.682
Wdr66	-0.263803	0.6119	0.990742	17.4106	13.2997	12.6495	10.8552	12.0299	8.94089	19.6838	0
Trim36	-0.263718	0.300003	0.976482	38.839	42.5591	46.2193	41.0084	34.8868	30.4653	43.5116	31.1895
C130083M11Rik	-0.263618	0.482016	0.986143	13.3928	31.9193	30.6507	20.5042	31.2778	19.5375	17.0938	11.1391
Sstr1	-0.263393	0.682124	0.992289	22.7677	7.97982	2.91911	6.03065	4.81197	7.28517	11.9139	6.68347
Cox6b1	-0.263229	0.0665389	0.88683	577.228	492.089	480.681	469.185	419.844	422.871	510.744	307.44
Zranb3	-0.263116	0.455612	0.983843	29.4641	31.9193	17.0282	30.1533	19.2479	26.1604	24.3458	11.1391
Terf1	-0.263032	0.135149	0.943101	97.7672	98.4178	97.3038	119.407	97.4423	83.1172	91.1672	66.8347
Rgs10	-0.262712	0.324882	0.976482	83.0351	55.8588	39.408	62.7188	50.5257	46.029	60.6055	35.6452
Gm42664	-0.262386	0.272999	0.974496	50.8925	45.219	74.9239	77.1924	50.5257	58.2814	60.0875	37.873
Qk	-0.262237	0.00251043	0.747015	2320.97	2154.55	1946.56	2046.8	1883.89	1683.21	1732.18	1757.75
Hspa13	-0.262193	0.0418071	0.866547	366.962	284.614	289.479	297.914	281.5	248.689	235.688	278.478
Ints12	-0.262111	0.12478	0.933869	135.267	101.078	106.061	97.6966	95.0364	96.363	88.5772	84.6573
Zfp120	-0.262017	0.125079	0.933869	139.285	143.637	115.305	141.117	116.69	95.3695	105.153	140.353
Trim56	-0.261957	0.256816	0.969966	53.5711	66.4985	58.8688	56.6881	68.5705	43.0487	44.5476	40.1008
C730034F03Rik	-0.261763	0.610898	0.990742	9.37493	15.9596	7.7843	12.0613	13.2329	10.9278	6.73394	2.22782
Gm37226	-0.26168	0.505243	0.98668	17.4106	23.9395	17.5147	10.8552	18.0449	12.2523	11.3959	17.8226
Apod	-0.261523	0.389702	0.97921	1663.38	2556.2	1350.09	1092.75	1222.24	1202.72	1854.42	1267.63
Fam149a	-0.261472	0.242887	0.963218	127.231	79.7982	69.5722	97.6966	72.1795	74.5075	95.3112	62.3791
Gm44423	-0.261469	0.540155	0.987859	21.4284	15.9596	17.5147	15.6797	15.6389	9.93433	10.3599	31.1895
Setdb2	-0.261396	0.280247	0.975338	38.839	55.8588	50.1114	38.5962	37.2927	35.4324	37.8137	44.5565
9430041J12Rik	-0.261351	0.356803	0.978328	32.1426	29.2594	27.2451	30.1533	24.0598	24.1735	24.3458	26.7339
Nme7	-0.261337	0.275042	0.975027	66.9638	55.8588	48.6519	60.3065	54.1346	41.0619	58.5335	33.4174
Nsun6	-0.261212	0.354241	0.978328	37.4997	63.8386	41.3541	31.3594	34.8868	39.4062	38.3317	20.0504
Nrg1	-0.261143	0.217349	0.957959	70.9816	66.4985	67.1396	59.1004	52.9316	49.6716	66.8214	46.7843
Apoe	-0.261039	0.165504	0.949956	7568.25	6966.39	4857.89	4188.89	5148.81	5226.78	5866.82	3410.8
Nup98	-0.261033	0.0909631	0.898059	180.802	226.095	222.826	217.104	164.81	213.919	168.349	144.809
Gabrg2	-0.260965	0.0368704	0.866547	1410.26	1040.04	935.576	1143.41	1011.72	929.853	927.73	906.724
Cep112	-0.260896	0.55847	0.987859	16.0713	15.9596	7.7843	15.6797	10.8269	12.2523	9.32392	11.1391
Col4a2	-0.260766	0.48685	0.986143	58.9282	13.2997	34.0563	16.8858	26.4658	28.1473	26.4178	24.5061
St8sia3os	-0.260709	0.538015	0.987859	10.7142	18.6196	14.109	27.741	15.6389	19.5375	10.3599	11.1391
Slc1a2	-0.260702	0.0366828	0.866547	4958	3950.01	3266	3520.7	3278.15	3267.73	3046.33	3506.59
Gadd45a	-0.260658	0.333956	0.976482	30.8034	47.8789	39.408	45.833	28.8718	30.7964	42.9936	28.9617
Dzank1	-0.260624	0.134209	0.943101	1558.92	893.74	862.111	891.331	826.455	834.483	842.261	1015.89
Nfkb2	-0.260565	0.576714	0.988634	14.732	34.5792	16.5416	9.64904	15.6389	18.8752	17.0938	2.22782
Itgb3	-0.260538	0.59904	0.990422	9.37493	18.6196	11.6765	4.82452	9.62394	9.60318	8.28793	6.68347
Vamp4	-0.260418	0.0380683	0.866547	547.764	502.729	396.026	453.505	413.829	357.967	394.195	416.603
Clec14a	-0.260391	0.559585	0.987859	13.3928	2.65994	18.4877	21.7104	15.6389	9.93433	12.4319	15.5948
Cd302	-0.26033	0.289631	0.976482	76.3387	71.8184	45.7328	54.2759	62.5556	50.3339	50.2456	33.4174
Zfp971	-0.260274	0.211551	0.955604	99.1064	119.697	108.494	126.644	132.329	86.0975	68.8934	98.0242
Hspd1-ps3	-0.260127	0.633675	0.991617	18.7499	5.31988	13.136	4.82452	4.81197	11.2589	6.73394	15.5948
Ttc23	-0.25989	0.489679	0.986143	32.1426	13.2997	16.0551	24.1226	20.4509	19.2064	19.6838	8.91129
Cdkl3	-0.259765	0.2615	0.969966	76.3387	69.1585	54.0036	48.2452	57.7436	51.9896	40.9216	55.6956
Cep192	-0.259697	0.160855	0.949956	89.7315	93.0979	113.359	92.8721	83.0064	89.4089	68.3754	93.5686
Wdr53	-0.259639	0.301423	0.976482	36.1605	47.8789	37.9485	38.5962	31.2778	31.7898	35.7417	31.1895
Chrnb1	-0.25962	0.516126	0.987859	13.3928	10.6398	19.9473	18.092	10.8269	14.5703	16.0579	11.1391
Ttll7	-0.259609	0.00177346	0.747015	1787.93	1651.82	1517.94	1684.96	1402.69	1362.99	1349.38	1434.72
Serpinb9	-0.259396	0.194988	0.952987	81.6959	74.4784	68.5992	57.8943	60.1496	54.3077	61.1235	60.1512
Adarb2	-0.259094	0.191836	0.952987	104.464	90.438	88.5464	82.0169	86.6154	84.1106	56.9795	80.2017
Gm37494	-0.259028	0.0402681	0.866547	431.247	566.568	538.576	588.592	476.385	448.038	382.281	476.754
Zfp119a	-0.258923	0.424298	0.983843	36.1605	13.2997	33.5698	28.9471	20.4509	21.8555	23.8278	37.873
Fam136a	-0.258839	0.215675	0.957959	77.678	69.1585	67.6261	66.3372	58.9466	55.3011	70.4474	42.3287
Tceal9	-0.258741	0.070967	0.894412	526.336	367.072	352.726	376.313	329.62	319.223	377.619	325.262
Scai	-0.258669	0.0401046	0.866547	479.461	414.951	501.601	575.324	455.934	428.501	355.863	425.514
Impad1	-0.258618	0.0406603	0.866547	1071.42	787.343	771.132	803.283	721.795	658.315	687.38	817.611
Tldc2	-0.258544	0.623237	0.991617	6.69638	13.2997	12.163	14.4736	9.62394	11.2589	13.4679	0
Pou2f2	-0.258482	0.214419	0.957959	65.6245	58.5187	76.87	71.1617	61.3526	48.3471	63.1954	64.6069
Mrc1	-0.258411	0.482975	0.986143	28.1248	34.5792	18.0012	14.4736	25.2628	15.8949	15.0219	22.2782
Gm16091	-0.258386	0.631465	0.991617	9.37493	5.31988	9.73038	18.092	2.40598	8.94089	9.84191	17.8226
Plce1	-0.258293	0.127293	0.934823	251.784	324.513	196.067	195.393	216.539	202.66	170.938	204.96
Map3k11	-0.258139	0.171587	0.949956	83.0351	90.438	74.4374	101.315	64.9616	71.5272	79.2533	69.0625
H2-T24	-0.25776	0.267827	0.971476	56.2496	63.8386	50.1114	61.5127	51.7287	55.3011	36.2597	46.7843
4833412K13Rik	-0.257587	0.602634	0.990624	5.35711	7.97982	15.0821	20.5042	7.21795	11.9212	8.28793	17.8226
Lrrc51	-0.256861	0.495759	0.986488	14.732	13.2997	17.5147	27.741	13.2329	16.5572	17.6118	13.3669
Pdss2	-0.256853	0.281846	0.975338	42.8568	37.2392	48.6519	53.0697	33.6838	37.0882	41.9576	44.5565
Gm12183	-0.256839	0.452789	0.983843	29.4641	18.6196	39.8945	20.5042	21.6539	24.5047	18.6478	35.6452
Sec61g	-0.256808	0.196367	0.952987	112.499	170.236	109.467	100.109	84.2094	95.0384	124.319	91.3408
Cacybp	-0.256745	0.107779	0.916331	462.05	292.594	316.724	288.265	327.214	259.617	283.862	271.794
Hltf	-0.256574	0.0366802	0.866547	308.034	247.375	309.426	288.265	273.079	243.391	235.688	222.782
Gng12	-0.256506	0.0761853	0.896453	286.605	252.694	202.392	232.783	226.162	202.329	197.874	175.998
Slc25a40	-0.25643	0.126401	0.933869	117.856	85.1181	115.305	133.88	93.8334	95.3695	94.2752	106.936
Pdlim4	-0.256425	0.480192	0.986143	37.4997	18.6196	25.299	18.092	20.4509	23.1801	26.4178	8.91129
Frmd3	-0.256368	0.336846	0.976482	40.1783	55.8588	38.435	30.1533	32.4808	35.4324	35.7417	24.5061
Gm45854	-0.256283	0.549977	0.987859	17.4106	18.6196	11.6765	12.0613	16.8419	12.9146	7.76993	11.1391
C130074G19Rik	-0.256149	0.434789	0.983843	20.0891	23.9395	21.4068	21.7104	18.0449	18.5441	16.5759	20.0504
Camk2n1	-0.256009	0.14826	0.94857	1888.38	1234.21	953.577	1147.03	1283.59	987.141	1114.73	982.47
Itga9	-0.255937	0.581627	0.988634	12.0535	10.6398	17.0282	12.0613	12.0299	12.2523	14.5039	2.22782
Fam43b	-0.255718	0.596164	0.990422	16.0713	10.6398	9.24386	7.23678	7.21795	8.94089	7.76993	13.3669
Map2k4	-0.255676	0.0425875	0.866547	618.746	470.81	450.03	505.369	421.047	447.707	456.872	372.047
Abcb1b	-0.255609	0.53625	0.987859	22.7677	18.6196	11.6765	12.0613	10.8269	12.5835	16.0579	11.1391
Eef1e1	-0.255388	0.174727	0.949956	223.659	138.317	143.523	144.736	144.359	146.366	146.075	98.0242
Slc7a2	-0.255357	0.0764719	0.896453	271.873	311.213	233.043	255.7	238.192	199.349	197.874	267.339
Dcdc2a	-0.25524	0.407154	0.983843	53.5711	29.2594	41.8406	20.5042	33.6838	26.1604	31.5977	35.6452
Atp7a	-0.255137	0.208793	0.955078	69.6424	63.8386	81.7352	67.5433	55.3376	68.5469	54.3895	62.3791
Fut10	-0.255119	0.243053	0.963218	85.7137	61.1787	75.4104	63.9249	63.7586	73.514	48.6916	53.4678
Gm9833	-0.255109	0.430491	0.983843	50.8925	63.8386	37.462	34.9778	55.3376	47.6848	26.4178	17.8226
Suclg2	-0.254684	0.195267	0.952987	135.267	146.297	114.818	77.1924	99.8483	102.324	101.527	80.2017
Rinl	-0.254659	0.603484	0.990624	12.0535	13.2997	8.75734	8.44291	6.01496	10.5966	8.80592	6.68347
Taok1	-0.25454	0.00875282	0.838674	925.44	1101.22	990.066	1104.82	869.763	854.683	798.231	937.914
Mettl23	-0.254361	0.244541	0.963218	64.2853	63.8386	65.1935	53.0697	56.5406	55.3011	53.8715	33.4174
Naca	-0.254345	0.0767452	0.896453	1182.58	1071.96	822.703	952.843	855.327	849.716	996.623	648.297
Il4	-0.254298	0.219903	0.957959	69.6424	95.7579	71.0318	96.4904	78.1945	56.2945	68.3754	77.9738
Zfp958	-0.254183	0.217776	0.957959	92.4101	77.1383	95.8442	77.1924	68.5705	60.5994	70.4474	104.708
Pnldc1	-0.254125	0.58129	0.988634	8.03566	15.9596	9.24386	14.4736	8.42094	9.60318	10.3599	8.91129
Tnfaip2	-0.253903	0.550943	0.987859	29.4641	13.2997	16.0551	9.64904	20.4509	14.5703	10.3599	13.3669
Plscr2	-0.25379	0.425261	0.983843	30.8034	29.2594	20.9203	26.5349	18.0449	20.5309	26.9358	20.0504
Fbxo4	-0.253738	0.307976	0.976482	44.1961	37.2392	44.2732	39.8023	44.5107	33.4456	32.6337	31.1895
Eps15	-0.253726	0.00907978	0.844248	1795.97	1513.51	1476.58	1770.6	1467.65	1389.81	1355.08	1281
Gstm6	-0.253676	0.586208	0.989224	21.4284	15.9596	11.1899	10.8552	18.0449	6.29174	14.5039	11.1391
Zfp133-ps	-0.253644	0.62799	0.991617	12.0535	2.65994	15.5686	12.0613	13.2329	11.9212	8.80592	2.22782
Tpgs2	-0.25363	0.100126	0.905368	149.999	111.718	133.306	153.179	109.472	124.179	111.887	118.075
Sgtb	-0.253623	0.0387118	0.866547	332.141	380.372	322.562	285.853	267.064	295.381	277.128	245.061
NA	-0.253573	0.313805	0.976482	62.946	53.1988	39.408	69.9556	55.3376	40.0685	50.2456	40.1008
Garem2	-0.25357	0.227645	0.961301	66.9638	58.5187	58.3823	59.1004	48.1197	55.6322	51.7995	42.3287
Cx3cl1	-0.253566	0.221402	0.957959	215.623	140.977	133.306	109.758	97.4423	131.133	142.449	126.986
Carnmt1	-0.253398	0.292761	0.976482	80.3566	47.8789	46.2193	57.8943	54.1346	41.7242	51.2815	49.0121
Gm21992	-0.253268	0.513212	0.987859	18.7499	13.2997	22.3799	42.2146	25.2628	23.5112	12.4319	24.5061
Dubr	-0.252974	0.48198	0.986143	36.1605	18.6196	17.5147	22.9165	28.8718	17.5506	16.5759	17.8226
Prcp	-0.252849	0.333759	0.976482	64.2853	90.438	44.2732	39.8023	55.3376	43.711	45.5836	46.7843
Nudt12	-0.252691	0.299929	0.976482	80.3566	63.8386	54.9766	49.4514	62.5556	38.4127	55.9435	53.4678
Prrg3	-0.252557	0.334867	0.976482	129.91	71.8184	55.4632	66.3372	62.5556	74.5075	55.9435	77.9738
Inpp5d	-0.252503	0.486034	0.986143	32.1426	53.1988	21.4068	14.4736	28.8718	22.1867	20.2018	24.5061
Med21	-0.252427	0.190029	0.952987	100.446	188.856	110.926	126.644	114.284	94.3761	109.815	113.619
Gm9967	-0.252397	0.527245	0.987859	12.0535	18.6196	16.5416	13.2674	13.2329	12.9146	13.4679	8.91129
Gm42067	-0.252377	0.636844	0.991617	16.0713	5.31988	13.6225	9.64904	6.01496	13.2458	13.4679	2.22782
Rbm12b2	-0.252365	0.131222	0.938381	103.124	125.017	116.765	119.407	103.457	85.4352	94.2752	115.847
Gm29237	-0.252228	0.521581	0.987859	16.0713	23.9395	18.0012	13.2674	15.6389	18.5441	9.84191	13.3669
Fam84a	-0.252188	0.238227	0.96139	87.053	63.8386	59.3553	69.9556	58.9466	66.8911	53.8715	49.0121
Fam91a1	-0.252091	0.0393975	0.866547	496.871	563.908	422.785	472.803	431.874	404.658	355.345	445.565
Aldh1a2	-0.251936	0.368142	0.978328	50.8925	29.2594	36.4889	36.1839	27.6688	37.7504	35.7417	22.2782
Tomm7	-0.251893	0.201159	0.954787	135.267	119.697	118.711	124.231	101.051	104.642	135.197	62.3791
Tpm4	-0.251875	0.0604661	0.874649	180.802	231.415	197.527	196.599	155.186	178.156	160.061	175.998
C1galt1	-0.251684	0.15488	0.949956	88.3922	109.058	91.4655	85.6353	78.1945	75.1697	84.9513	66.8347
[truncated: 12,198 more rows]
